# Supplementary material for: Contrasting heat stress response patterns of coral holobionts across the Red Sea suggest distinct mechanisms of thermal tolerance
Source: Research Square preprint supplement (doi:10.21203/rs.3.rs-117181/v1), 2020-12-18
Supplement: Supplementary file 1 [file DataS3_ITS2_SymPortal.xlsx]

## Sheet: ITS2 type profiles
ITS2 type profile UID		23937	24018	24019	24991	24017	24973	24021	24944	24022
Clade		A	A	A	A	A	A	A	A	A
Majority ITS2 sequence		A1	A1	A1g/A1	A1	A1	A1/A1cl	A1	A1	A1
Associated species		S. microadriaticum	S. microadriaticum	S. microadriaticum	S. microadriaticum	S. microadriaticum	S. microadriaticum	S. microadriaticum	S. microadriaticum	S. microadriaticum
ITS2 type abundance local		22	18	15	15	6	3	3	1	1
ITS2 type abundance DB		43	18	40	40	16	4	8	5	8
ITS2 type profile		A1-A1z	A1-A1dv-A1dw-A1dl	A1g/A1-A1l-A1cr-A1o-A1dp-A1p-A1dq-A1dn	A1-A1ds-A1z-A1dr-A1bh	A1-A1dm	A1/A1cl-A1z	A1-A1z-A1do	A1-A1du-A1z-A1ds-A1dr	A1-A1ea
45834	ICN1-30	0	0.788	0	0	0	0	0	0	0
45835	ICN1-33	0	0.809	0	0	0	0	0	0	0
45839	ICN1-36	0	0.835	0	0	0	0	0	0	0
45837	ICN2-30	0	0.879	0	0	0	0	0	0	0
45838	ICN2-33	0	0.87	0	0	0	0	0	0	0
45842	ICN2-36	0	0.884	0	0	0	0	0	0	0
45840	ICN3-30	0	0.816	0	0	0	0	0	0	0
45841	ICN3-33	0	0.799	0	0	0	0	0	0	0
45845	ICN3-36	0	0.804	0	0	0	0	0	0	0
45843	ICN4-30	0	0	0	0	0	0.964	0	0	0
45844	ICN4-33	0	0	0	0	0	0.965	0	0	0
45848	ICN4-36	0	0	0	0	0	0.967	0	0	0
45846	ICN5-30	0	0.871	0	0	0	0	0	0	0
45847	ICN5-33	0	0.856	0	0	0	0	0	0	0
45851	ICN5-36	0	0.882	0	0	0	0	0	0	0
45849	ICN6-30	0	0.873	0	0	0	0	0	0	0
45850	ICN6-33	0	0.872	0	0	0	0	0	0	0
45854	ICN6-36	0	0.879	0	0	0	0	0	0	0
45852	ICN7-30	0	0.84	0	0	0	0	0	0	0
45853	ICN7-33	0	0.819	0	0	0	0	0	0	0
45836	ICN7-36	0	0.855	0	0	0	0	0	0	0
45855	AF1-30	0.882	0	0	0	0	0	0	0	0
45856	AF1-33	0.883	0	0	0	0	0	0	0	0
45857	AF1-36	0.871	0	0	0	0	0	0	0	0
45858	AF2-30	0.85	0	0	0	0	0	0	0	0
45859	AF2-33	0.858	0	0	0	0	0	0	0	0
45860	AF2-36	0.857	0	0	0	0	0	0	0	0
45861	AF3-30	0.853	0	0	0	0	0	0	0	0
45862	AF3-33	0.849	0	0	0	0	0	0	0	0
45863	AF3-36	0.847	0	0	0	0	0	0	0	0
45864	AF4-30	0.866	0	0	0	0	0	0	0	0
45865	AF4-33	0.868	0	0	0	0	0	0	0	0
45866	AF4-36	0.868	0	0	0	0	0	0	0	0
45867	AF5-30	0.844	0	0	0	0	0	0	0	0
45868	AF5-33	0.84	0	0	0	0	0	0	0	0
45869	AF5-36	0.84	0	0	0	0	0	0	0	0
45870	AF6-30	0.8	0	0	0	0	0	0	0	0
45871	AF6-33	0.793	0	0	0	0	0	0	0	0
45872	AF6-36	0	0	0	0	0	0	0	0	0.801
45873	AF7-30	0.807	0	0	0	0	0	0	0	0
45874	AF7-33	0.803	0	0	0	0	0	0	0	0
45875	AF7-36	0.806	0	0	0	0	0	0	0	0
45876	ExT1-30	0	0	0.99	0	0	0	0	0	0
45877	ExT1-33	0	0	0.986	0	0	0	0	0	0
45878	ExT1-36	0	0	0.981	0	0	0	0	0	0
45882	ExT2-30	0	0	0.983	0	0	0	0	0	0
45883	ExT2-33	0	0	0.982	0	0	0	0	0	0
45884	ExT2-36	0	0	0.983	0	0	0	0	0	0
45888	ExT3-30	0	0	0	0	0.947	0	0	0	0
45889	ExT3-33	0	0	0	0	0.948	0	0	0	0
45890	ExT3-36	0	0	0	0	0.949	0	0	0	0
45894	ExT4-30	0	0	0	0	0	0	0.842	0	0
45895	ExT4-33	0	0	0	0	0	0	0.846	0	0
45896	ExT4-36	0	0	0	0	0	0	0.851	0	0
45900	ExT5-30	0	0	0.987	0	0	0	0	0	0
45901	ExT5-33	0	0	0.987	0	0	0	0	0	0
45902	ExT5-36	0	0	0.982	0	0	0	0	0	0
45906	ExT6-30	0	0	0.989	0	0	0	0	0	0
45907	ExT6-33	0	0	0.989	0	0	0	0	0	0
45908	ExT6-36	0	0	0.981	0	0	0	0	0	0
45912	ExT7-30	0	0	0.991	0	0	0	0	0	0
45913	ExT7-33	0	0	0.982	0	0	0	0	0	0
45914	ExT7-36	0	0	0.982	0	0	0	0	0	0
45879	PrT1-30	0	0	0	0.949	0	0	0	0	0
45880	PrT1-33	0	0	0	0.958	0	0	0	0	0
45881	PrT1-36	0	0	0	0.951	0	0	0	0	0
45885	PrT2-30	0	0	0	0.956	0	0	0	0	0
45886	PrT2-33	0	0	0	0.965	0	0	0	0	0
45887	PrT2-36	0	0	0	0.965	0	0	0	0	0
45891	PrT3-30	0	0	0	0.951	0	0	0	0	0
45892	PrT3-33	0	0	0	0.942	0	0	0	0	0
45893	PrT3-36	0	0	0	0.956	0	0	0	0	0
45897	PrT4-30	0	0	0	0.945	0	0	0	0	0
45898	PrT4-33	0	0	0	0.956	0	0	0	0	0
45899	PrT4-36	0	0	0	0.957	0	0	0	0	0
45903	PrT5-30	0.911	0	0	0	0	0	0	0	0
45904	PrT5-33	0	0	0	0	0	0	0	0.957	0
45905	PrT5-36	0.916	0	0	0	0	0	0	0	0
45909	PrT6-30	0	0	0	0.957	0	0	0	0	0
45910	PrT6-33	0	0	0	0.956	0	0	0	0	0
45911	PrT6-36	0	0	0	0.962	0	0	0	0	0
45915	PrT7-30	0	0	0	0	0.953	0	0	0	0
45916	PrT7-33	0	0	0	0	0.955	0	0	0	0
45917	PrT7-36	0	0	0	0	0.96	0	0	0	0
Sequence accession / SymPortal UID		883-930	883-9195-9682-4911	965/883-5444-5893-10912-10914-921-10915-3660	883-70735-930-66507-2055	883-2796	883/2061-930	883-930-7327	883-2069-930-70735-66507	883-7626
Average defining sequence proportions and [stdev]		0.960[0.055]-0.040[0.055]	0.597[0.047]-0.210[0.019]-0.145[0.044]-0.048[0.006]	0.289[0.027]/0.176[0.036]-0.165[0.051]-0.089[0.016]-0.086[0.026]-0.070[0.015]-0.048[0.009]-0.042[0.009]-0.035[0.008]	0.619[0.018]-0.148[0.011]-0.123[0.012]-0.090[0.009]-0.019[0.003]	0.901[0.011]-0.099[0.011]	0.488[0.251]/0.503[0.251]-0.008[0.002]	0.908[0.010]-0.050[0.006]-0.042[0.004]	0.898[0.045]-0.029[0.005]-0.029[0.016]-0.026[0.020]-0.019[0.012]	0.924[0.099]-0.076[0.099]
Species references
S. microadriaticum
meta_info_summary
data_set_info

## Sheet: ITS2 seq abund
	sample_name	raw_contigs	post_qc_absolute_seqs	post_qc_unique_seqs	post_taxa_id_absolute_symbiodinium_seqs	post_taxa_id_unique_symbiodinium_seqs	size_screening_violation_absolute	size_screening_violation_unique	post_taxa_id_absolute_non_symbiodinium_seqs	post_taxa_id_unique_non_symbiodinium_seqs	post_med_absolute	post_med_unique	noName Clade A	noName Clade B	noName Clade C	noName Clade D	noName Clade E	noName Clade F	noName Clade G	noName Clade H	noName Clade I	A1	A1g	A1dv	A1z	A1l	A1dw	A1ds	A1cl	A1cr	A1dr	A1o	A1dp	A1p	A1dl	A1dq	A1dn	A1dm	A1dt	A1am	A1dy	A1bh	70739_A	A1ct	58464_A	3263_A	6081_A	2771_A	3525_A
45834	ICN1-30	2.46198	1.03983	0.0191926	1.03983	0.0191926	0	0	0	0	1	0.00207245	0.125969	0	0	0	0	0	0	0	0	0.452964	0	0.180032	0	0	0.16102	0	0	0	0	0	0	0	0.0252298	0	0	0	0	0.0346909	0	0	0	0.00837989	0.0200036	0	0	0	0
45835	ICN1-33	3.10288	1.02431	0.0197154	1.02431	0.0197154	0	0	0	0	1	0.00340943	0.124963	0	0	0	0	0	0	0	0	0.456419	0	0.181886	0	0	0.158464	0	0	0	0	0	0	0	0.0317225	0	0	0	0	0.0283131	0	0	0	0.0102283	0.0195672	0	0	0	0
45839	ICN1-36	2.33544	1.03865	0.0222461	1.03824	0.0221117	0	0	0.000403253	0.000134418	1	0.00107534	0.0856912	0	0	0	0	0	0	0	0	0.462531	0	0.19672	0	0	0.172323	0	0	0	0	0	0	0	0.0351502	0	0	0	0	0.0308488	0	0	0	0.0100141	0.0208347	0	0	0	0
45837	ICN2-30	2.16513	1.03483	0.0191551	1.03483	0.0191551	0	0	0	0	1	0.00113568	0.0586008	0	0	0	0	0	0	0	0	0.557541	0	0.170427	0	0	0.136205	0	0	0	0	0	0	0	0.0449727	0	0	0	0	0.0199879	0	0	0	0.0122653	0.00696548	0	0	0	0
45838	ICN2-33	2.47846	1.0341	0.020555	1.0341	0.020555	0	0	0	0	1	0.00149491	0.0640007	0	0	0	0	0	0	0	0	0.551621	0	0.17126	0	0	0.13286	0	0	0	0	0	0	0	0.0439129	0	0	0	0	0.0217696	0	0	0	0.0145754	0.00607306	0	0	0	0
45842	ICN2-36	2.53973	1.03376	0.0214561	1.03376	0.0214561	0	0	0	0	1	0.00125685	0.0523386	0	0	0	0	0	0	0	0	0.546548	0	0.177754	0	0	0.140138	0	0	0	0	0	0	0	0.0491965	0	0	0	0	0.0207379	0	0	0	0.0132867	0.0067331	0	0	0	0
45840	ICN3-30	2.86786	1.03125	0.0190739	1.03125	0.0190739	0	0	0	0	1	0.00229806	0.104791	0	0	0	0	0	0	0	0	0.470872	0	0.192692	0	0	0.142595	0	0	0	0	0	0	0	0.035505	0	0	0	0	0.029645	0	0	0	0.00930714	0.0293002	0	0	0	0
45841	ICN3-33	2.81857	1.04135	0.0212964	1.04135	0.0212964	0	0	0	0	1	0.00206761	0.115063	0	0	0	0	0	0	0	0	0.441538	0	0.202006	0	0	0.148248	0	0	0	0	0	0	0	0.0407319	0	0	0	0	0.0295668	0	0	0	0.010855	0.0276026	0	0	0	0
45845	ICN3-36	2.57993	1.0279	0.021391	1.02539	0.0208907	0	0	0.00250188	0.000500375	1	0.00250188	0.119089	0	0	0	0	0	0	0	0	0.437203	0	0.201776	0	0	0.141231	0	0	0	0	0	0	0	0.0437828	0	0	0	0	0.0315236	0	0	0	0.0136352	0.0268952	0	0	0	0
45843	ICN4-30	2.05732	1.01018	0.0185292	1.01018	0.0185292	0	0	0	0	1	0.000672043	0.0136329	0	0	0	0	0	0	0	0	0.343126	0	0	0.00633641	0	0	0	0.62404	0	0	0	0	0	0	0	0	0	0	0	0	0.0128648	0	0	0	0	0	0	0
45844	ICN4-33	2.40182	1.00796	0.018666	1.00796	0.018666	0	0	0	0	1	0.00099552	0.0143106	0	0	0	0	0	0	0	0	0.352663	0	0	0.00671976	0	0	0	0.613614	0	0	0	0	0	0	0	0	0	0	0	0	0.0126929	0	0	0	0	0	0	0
45848	ICN4-36	2.82567	1.01184	0.0224644	1.01184	0.0224644	0	0	0	0	1	0.00107614	0.00699489	0	0.000538068	0	0	0	0	0	0	0.366156	0	0	0.011703	0	0	0	0.600888	0	0	0	0	0	0	0	0	0	0	0	0	0.0131827	0	0	0	0	0	0	0
45846	ICN5-30	3.06284	1.02822	0.0205122	1.02744	0.0202508	0	0	0.000783904	0.000261301	1	0.00195976	0.0589234	0	0	0	0	0	0	0	0	0.543507	0	0.182258	0	0	0.125686	0	0	0	0	0	0	0	0.0435067	0	0	0	0	0.0316175	0	0	0	0.0145022	0.00901489	0	0	0	0
45847	ICN5-33	3.42986	1.04234	0.0209236	1.04234	0.0209236	0	0	0	0	1	0.00173332	0.0673517	0	0	0	0	0	0	0	0	0.537204	0	0.175808	0	0	0.13297	0	0	0	0	0	0	0	0.0463043	0	0	0	0	0.0278569	0	0	0	0.0125046	0.00978086	0	0	0	0
45851	ICN5-36	2.82221	1.03329	0.0201587	1.03329	0.0201587	0	0	0	0	1	0.00156067	0.0498114	0	0	0	0	0	0	0	0	0.550917	0	0.181038	0	0	0.130316	0	0	0	0	0	0	0	0.0495513	0	0	0	0	0.0277019	0	0	0	0.0106646	0	0	0	0	0
45849	ICN6-30	2.44008	1.03651	0.0197482	1.03651	0.0197482	0	0	0	0	1	0.00135882	0.0615998	0	0	0	0	0	0	0	0	0.562007	0	0.168222	0	0	0.131171	0	0	0	0	0	0	0	0.0435728	0	0	0	0	0.0207446	0	0	0	0.0126823	0.00661292	0	0	0	0
45850	ICN6-33	2.19088	1.03449	0.0188532	1.03449	0.0188532	0	0	0	0	1	0.0013901	0.0630756	0	0	0	0	0	0	0	0	0.54848	0	0.171156	0	0	0.140921	0	0	0	0	0	0	0	0.0413553	0	0	0	0	0.0212858	0	0	0	0.0137272	0.00799305	0	0	0	0
45854	ICN6-36	2.41636	1.02964	0.0230029	1.02964	0.0230029	0	0	0	0	1	0.00153994	0.0618864	0	0	0	0	0	0	0	0	0.543407	0	0.172955	0	0	0.140231	0	0	0	0	0	0	0	0.0486044	0	0	0	0	0.0214629	0	0	0	0.0114533	0.00654475	0	0	0	0
45852	ICN7-30	3.32044	1.12737	0.0236284	1.02185	0.0216864	0	0	0.105519	0.00194206	1	0.00258942	0.0878783	0	0	0	0	0	0	0	0	0.586826	0	0.183849	0	0	0.0475805	0	0	0	0	0	0	0	0.0401359	0	0	0	0	0.0131089	0	0	0	0.0111669	0	0	0	0	0
45853	ICN7-33	2.92793	1.1412	0.022905	1.04148	0.0213687	0	0	0.0997207	0.00153631	1	0.00223464	0.0891061	0	0	0	0	0	0	0	0	0.580447	0	0.185335	0	0	0.0432961	0	0	0	0	0	0	0	0.0439944	0	0	0	0	0.0129888	0	0	0	0.0113128	0	0	0	0	0
45836	ICN7-36	2.47042	1.08285	0.0209921	1.03444	0.0199462	0	0	0.0484088	0.00104587	1	0.00112057	0.0639474	0	0	0	0	0	0	0	0	0.577992	0	0.204766	0	0	0.0590916	0	0	0	0	0	0	0	0.04303	0	0	0	0	0.014941	0	0	0	0.0119528	0	0	0	0	0
45855	AF1-30	2.33163	1.04292	0.0178358	1.04204	0.0177562	0	0	0.000875866	7.96242e-05	1	0.00095549	0.051915	0	0	0	0	0	0	0	0	0.885341	0	0	0.0341588	0	0	0	0	0	0	0	0	0	0	0	0	0	0.0270722	0	0	0	0	0	0	0	0	0.00676805	0.0124214
45856	AF1-33	2.16888	1.03033	0.0162104	1.03033	0.0162104	0	0	0	0	1	0.00100865	0.0630403	0	0	0	0	0	0	0	0	0.875432	0	0	0.0347262	0	0	0	0	0	0	0	0	0	0	0	0	0	0.0262968	0	0	0	0	0	0	0	0	0.00871758	0.0101585
45857	AF1-36	2.5605	1.03496	0.0158272	1.03334	0.0156866	0	0	0.0016179	0.000140687	1	0.00119584	0.0725943	0	0	0	0	0	0	0	0	0.866911	0	0	0.033202	0	0	0	0	0	0	0	0	0	0	0	0	0	0.0263787	0	0	0	0	0	0	0	0	0.0103405	0.00998875
45858	AF2-30	2.34601	1.04656	0.0185044	1.04504	0.0184199	0	0	0.00152091	8.44951e-05	1	0.00101394	0.0833122	0	0	0	0	0	0	0	0	0.851711	0	0	0.0364174	0	0	0	0	0	0	0	0	0	0	0	0	0	0.0276299	0	0	0	0	0	0	0.0188424	0.0185889	0.0086185	0.0122518
45859	AF2-33	2.16796	1.03765	0.0163606	1.03658	0.0162178	0	0	0.00107166	0.000142888	1	0.000857327	0.0871615	0	0	0	0	0	0	0	0	0.854326	0	0	0.0345788	0	0	0	0	0	0	0	0	0	0	0	0	0	0.0239337	0	0	0	0	0	0	0.0190755	0.0166464	0.00893049	0.0122169
45860	AF2-36	1.88151	1.04131	0.0142007	1.03845	0.0136936	0	0	0.00285859	0.00050717	1	0.000599382	0.0851123	0	0	0	0	0	0	0	0	0.854673	0	0	0.0347642	0	0	0	0	0	0	0	0	0	0	0	0	0	0.0249896	0	0	0	0	0	0	0.0188114	0.0161372	0.00751533	0.0115727
45861	AF3-30	2.82922	1.03565	0.0173675	1.03451	0.0171389	0	0	0.0011426	0.000228519	1	0.00129494	0.10032	0	0	0	0	0	0	0	0	0.856566	0	0	0.0258988	0	0	0	0	0	0	0	0	0	0	0	0	0	0.0168342	0	0	0	0	0	0	0.0117307	0.0111213	0.0104357	0.00624619
45862	AF3-33	2.61112	1.03531	0.0197959	1.03531	0.0197959	0	0	0	0	1	0.00173469	0.0988776	0	0	0	0	0	0	0	0	0.854082	0	0	0.0247959	0	0	0	0	0	0	0	0	0	0.00826531	0	0	0	0.0139796	0	0	0	0	0	0	0.0107143	0.0072449	0.0106122	0.00642857
45863	AF3-36	2.13005	1.05587	0.0185655	1.05272	0.017865	0	0	0.00315264	0.000700587	1	0.00113845	0.0914266	0	0	0	0	0	0	0	0	0.862247	0	0	0.0290743	0	0	0	0	0	0	0	0	0	0	0	0	0	0.0172519	0	0	0	0	0	0	0.0124354	0.0153253	0.0111218	0.00726859
45864	AF4-30	1.8902	1.04509	0.0135826	1.04509	0.0135826	0	0	0	0	1	0.000671384	0.072716	0	0	0	0	0	0	0	0	0.876517	0	0	0.0286629	0	0	0	0	0	0	0	0	0	0	0	0	0	0.022104	0	0	0	0	0	0	0.0132727	0.00531942	0.00877963	0.00810825
45865	AF4-33	2.19706	1.04342	0.0160161	1.04342	0.0160161	0	0	0	0	1	0.000913464	0.0720419	0	0	0	0	0	0	0	0	0.882224	0	0	0.0238719	0	0	0	0	0	0	0	0	0	0	0	0	0	0.0204007	0	0	0	0	0	0	0.0127276	0.00651605	0.00907375	0.00876926
45866	AF4-36	1.98711	1.04951	0.0148416	1.04951	0.0148416	0	0	0	0	1	0.00068764	0.0681909	0	0	0	0	0	0	0	0	0.885795	0	0	0.0251562	0	0	0	0	0	0	0	0	0	0	0	0	0	0.0208584	0	0	0	0	0	0	0.0131225	0.00469887	0.00888201	0.0103146
45867	AF5-30	1.90687	1.04059	0.0160191	1.04059	0.0160191	0	0	0	0	1	0.000956366	0.0971309	0	0	0	0	0	0	0	0	0.850149	0	0	0.0285117	0	0	0	0	0	0	0	0	0	0	0	0	0	0.0231919	0	0	0	0	0	0	0.0147041	0.00824866	0.00926479	0.00830843
45868	AF5-33	2.14311	1.03434	0.0184197	1.03434	0.0184197	0	0	0	0	1	0.00150025	0.104434	0	0	0	0	0	0	0	0	0.836889	0	0	0.031922	0	0	0	0	0	0	0	0	0	0	0	0	0	0.0267545	0	0	0	0	0	0	0.0155026	0.00641774	0.0100017	0.00875146
45869	AF5-36	2.04141	1.04048	0.0198614	1.04048	0.0198614	0	0	0	0	1	0.00135227	0.105899	0	0	0	0	0	0	0	0	0.846095	0	0	0.0277214	0	0	0	0	0	0	0	0	0	0	0	0	0	0.020284	0	0	0	0	0	0	0.0166498	0.00600068	0.00853617	0.0104801
45870	AF6-30	2.10484	1.03322	0.0169211	1.03322	0.0169211	0	0	0	0	1	0.00138131	0.145935	0	0	0	0	0	0	0	0	0.786795	0	0	0.0397127	0	0	0	0	0	0	0	0	0	0	0	0	0	0.0275572	0	0	0	0	0	0	0.0145038	0.00628496	0.00994544	0.0100145
45871	AF6-33	2.49885	1.05302	0.0206973	1.05013	0.0200187	0	0	0.00288404	0.000678599	1	0.00178132	0.114429	0	0	0	0	0	0	0	0	0.801849	0	0	0.0312155	0	0	0	0	0	0	0	0	0	0	0	0	0	0.0259564	0	0	0	0	0	0	0.00458054	0.0276529	0.00593774	0.00653151
45872	AF6-36	2.2893	1.04116	0.018452	1.04116	0.018452	0	0	0	0	1	0.00150288	0.110044	0	0	0	0	0	0	0	0	0.804292	0	0	0.0256325	0	0	0	0	0	0	0	0	0	0	0	0	0	0.024547	0	0	0	0	0	0	0	0.0286382	0.00943475	0.00692995
45873	AF7-30	1.94979	1.02849	0.0179838	1.02817	0.0179193	0	0	0.00032229	6.44579e-05	1	0.000580121	0.029135	0	0	0	0	0	0	0	0	0.820227	0	0	0.00960423	0	0	0	0	0	0	0	0	0	0	0	0	0	0.0101843	0	0.13085	0	0	0	0	0	0	0.00728374	0.00476989
45874	AF7-33	2.2352	1.04802	0.0207067	1.03541	0.0193563	0	0	0.0126041	0.00135044	1	0.000675219	0.0299347	0	0	0	0	0	0	0	0	0.818741	0	0	0.012304	0	0	0	0	0	0	0	0	0	0	0	0	0	0.00982819	0	0.129192	0	0	0	0	0	0	0.00660215	0.0055518
45875	AF7-36	2.29246	1.03002	0.0187457	1.0298	0.0186695	0	0	0.000228606	7.62021e-05	1	0.000990627	0.0299474	0	0	0	0	0	0	0	0	0.819553	0	0	0.0106683	0	0	0	0	0	0	0	0	0	0	0	0	0	0.0118113	0	0.126267	0	0	0	0	0	0	0.00701059	0.00533415
45876	ExT1-30	4.00961	1.01025	0.0108887	1.01025	0.0108887	0	0	0	0	1	0.00144115	0	0	0	0	0	0	0	0	0	0.176461	0.30008	0	0	0.155965	0	0	0	0.0965572	0	0.0755805	0.0558847	0.053803	0	0.0480384	0.0376301	0	0	0	0	0	0	0	0	0	0	0	0
45877	ExT1-33	3.05367	1.01453	0.0137453	1.01453	0.0137453	0	0	0	0	1	0.00117816	0	0	0	0	0	0	0	0	0	0.167954	0.28865	0	0	0.170703	0	0	0	0.0967404	0	0.076188	0.0645372	0.0582537	0	0.0420212	0.0349522	0	0	0	0	0	0	0	0	0	0	0	0
45878	ExT1-36	2.69425	1.0215	0.013875	1.0195	0.013375	0	0	0.002	0.0005	1	0.001125	0	0	0	0	0	0	0	0	0	0.167875	0.290875	0	0	0.1525	0	0	0	0.097125	0	0.076125	0.067625	0.06175	0	0.045625	0.0405	0	0	0	0	0	0	0	0	0	0	0	0
45882	ExT2-30	2.78234	1.01902	0.0147567	1.01764	0.0145262	0	0	0.00138344	0.000230574	1	0.00103758	0	0	0	0	0	0	0	0	0	0.157252	0.303781	0	0	0.169933	0	0	0	0.0973023	0	0.0766659	0.0700945	0.0472677	0	0.0409269	0.0367766	0	0	0	0	0	0	0	0	0	0	0	0
45883	ExT2-33	2.60972	1.01829	0.012024	1.01829	0.012024	0	0	0	0	1	0.00112725	0	0	0	0	0	0	0	0	0	0.155185	0.299724	0	0	0.169213	0	0	0	0.0961924	0	0.0776553	0.0727705	0.0494739	0	0.0433367	0.0364479	0	0	0	0	0	0	0	0	0	0	0	0
45884	ExT2-36	2.95355	1.01705	0.0137139	1.01705	0.0137139	0	0	0	0	1	0.00111193	0	0	0	0	0	0	0	0	0	0.165802	0.28762	0	0	0.164813	0	0	0	0.0964912	0	0.0826538	0.071658	0.0460835	0	0.0427477	0.04213	0	0	0	0	0	0	0	0	0	0	0	0
45888	ExT3-30	1.91182	1.0147	0.0150704	1.01451	0.0150081	0.000186823	6.22743e-05	0	0	1	0.000373646	0.0302653	0	0	0	0	0	0	0	0	0.871653	0	0	0.00940341	0	0	0	0	0	0	0	0	0	0	0	0	0.0886785	0	0	0	0	0	0	0	0	0	0	0
45889	ExT3-33	2.09757	1.01093	0.0195563	1.01009	0.0194512	0.000841131	0.000105141	0	0	1	0.00073599	0.0313321	0	0	0	0	0	0	0	0	0.876354	0	0	0.0106193	0	0	0	0	0	0	0	0	0	0	0	0	0.0816949	0	0	0	0	0	0	0	0	0	0	0
45890	ExT3-36	2.41406	1.0075	0.0201602	1.00594	0.020031	0.00155079	0.000129232	0	0	1	0.000904627	0.0364435	0	0	0	0	0	0	0	0	0.871414	0	0	0.0087878	0	0	0	0	0	0	0	0	0	0	0	0	0.0833549	0	0	0	0	0	0	0	0	0	0	0
45894	ExT4-30	2.61559	1.02442	0.0172074	1.01932	0.0168673	0	0	0.005101	0.000340067	1	0.00115623	0.0478134	0	0	0	0	0	0	0	0	0.78739	0	0	0.0388356	0	0	0	0	0	0	0	0	0.0295178	0.0296538	0	0	0	0	0	0	0	0	0	0	0	0	0	0
45895	ExT4-33	2.475	1.03539	0.0190492	1.03539	0.0190492	0	0	0	0	1	0.000985303	0.0357172	0	0	0	0	0	0	0	0	0.79752	0	0	0.0432712	0	0	0	0	0	0	0	0	0.0339108	0.0282453	0	0	0	0	0	0	0	0	0	0	0	0	0	0
45896	ExT4-36	3.31437	1.04743	0.0194439	1.03725	0.0184445	0	0	0.0101763	0.000999455	1	0.00118117	0.0377976	0	0	0	0	0	0	0	0	0.804834	0	0	0.0415228	0	0	0	0	0	0	0	0	0.0276213	0.027167	0	0	0	0	0	0	0	0	0	0	0	0	0	0
45900	ExT5-30	3.23002	1.01295	0.0123223	1.01295	0.0123223	0	0	0	0	1	0.0014218	0	0	0	0	0	0	0	0	0	0.131754	0.293681	0	0	0.174408	0	0	0	0.0943128	0	0.0867299	0.085624	0.0505529	0	0.050237	0.0327014	0	0	0	0	0	0	0	0	0	0	0	0
45901	ExT5-33	2.64888	1.01308	0.0147929	1.01308	0.0147929	0	0	0	0	1	0.000954381	0	0	0	0	0	0	0	0	0	0.129414	0.294999	0	0	0.18076	0	0	0	0.092384	0	0.0887574	0.0798817	0.0506776	0	0.0474327	0.0356938	0	0	0	0	0	0	0	0	0	0	0	0
45902	ExT5-36	2.35873	1.01831	0.0160519	1.01831	0.0160519	0	0	0	0	1	0.000811615	0	0	0	0	0	0	0	0	0	0.125079	0.29128	0	0	0.188565	0	0	0	0.0886464	0	0.0864821	0.0898187	0.047254	0	0.0486969	0.034178	0	0	0	0	0	0	0	0	0	0	0	0
45906	ExT6-30	3.56711	1.01075	0.0100373	1.01075	0.0100373	0	0	0	0	1	0.0014339	0	0	0	0	0	0	0	0	0	0.159019	0.295956	0	0	0.133783	0	0	0	0.111844	0	0.0744193	0.0845999	0.0496128	0	0.0490393	0.0417264	0	0	0	0	0	0	0	0	0	0	0	0
45907	ExT6-33	3.11639	1.01086	0.0115688	1.01086	0.0115688	0	0	0	0	1	0.00141084	0	0	0	0	0	0	0	0	0	0.162246	0.293172	0	0	0.157449	0	0	0	0.0984763	0	0.0883183	0.074351	0.0454289	0	0.0447235	0.0358352	0	0	0	0	0	0	0	0	0	0	0	0
45908	ExT6-36	2.66554	1.02937	0.0166602	1.01926	0.0151194	0	0	0.0101117	0.00154083	1	0.000866718	0	0	0	0	0	0	0	0	0	0.157454	0.291891	0	0	0.152542	0	0	0	0.0993837	0	0.0899461	0.0786787	0.0456471	0	0.0399653	0.0444915	0	0	0	0	0	0	0	0	0	0	0	0
45912	ExT7-30	5.53102	1.00894	0.00731509	1.00894	0.00731509	0	0	0	0	1	0.00243836	0	0	0	0	0	0	0	0	0	0.123273	0.262801	0	0	0.211867	0	0	0	0.0953671	0	0.0894067	0.0777567	0.0547277	0	0.0512056	0.0335952	0	0	0	0	0	0	0	0	0	0	0	0
45913	ExT7-33	3.03976	1.01828	0.0121068	1.01792	0.0119881	0	0	0.000356083	0.000118694	1	0.00106825	0	0	0	0	0	0	0	0	0	0.12451	0.280237	0	0	0.206291	0	0	0	0.0860534	0	0.0883086	0.0840356	0.0468843	0	0.0527003	0.0309792	0	0	0	0	0	0	0	0	0	0	0	0
45914	ExT7-36	2.57522	1.01824	0.0150255	1.01824	0.0150255	0	0	0	0	1	0.000850501	0	0	0	0	0	0	0	0	0	0.133056	0.277925	0	0	0.195804	0	0	0	0.0867511	0	0.101021	0.0787186	0.045549	0	0.04536	0.0358155	0	0	0	0	0	0	0	0	0	0	0	0
45879	PrT1-30	2.29918	1.01641	0.0187901	1.01613	0.0186984	0	0	0.000274977	9.1659e-05	1	0.00100825	0.0303391	0	0	0	0	0	0	0	0	0.613107	0.00577452	0	0.100458	0	0	0.144271	0	0	0.0797434	0	0	0	0	0	0	0	0	0	0	0.0263061	0.0131072	0	0	0	0	0	0
45880	PrT1-33	3.05341	1.0158	0.0182909	1.01536	0.0181446	0	0	0.000438982	0.000146327	1	0.00146327	0.0269242	0	0	0	0	0	0	0	0	0.623646	0	0	0.104331	0	0	0.133158	0	0	0.0857477	0	0	0	0	0	0	0	0	0	0	0.0261926	0.0111209	0	0	0	0	0	0
45881	PrT1-36	2.30716	1.01736	0.018645	1.01736	0.018645	0	0	0	0	1	0.000803665	0.0281283	0	0	0	0	0	0	0	0	0.623242	0.00450052	0	0.104557	0	0	0.141445	0	0	0.0769107	0	0	0	0	0	0	0	0	0	0	0.0212167	0.0122157	0	0	0	0	0	0
45885	PrT2-30	2.66736	1.01662	0.0204135	1.01662	0.0204135	0	0	0	0	1	0.0011777	0.0236849	0	0	0	0	0	0	0	0	0.599581	0.00431824	0	0.117639	0	0	0.15297	0	0	0.0847946	0	0	0	0	0	0	0	0	0	0	0.0170113	0.015441	0	0	0	0	0	0
45886	PrT2-33	3.07566	1.01441	0.0175845	1.01415	0.0174987	0	0	0.000257334	8.5778e-05	1	0.000686224	0.0209298	0	0	0	0	0	0	0	0	0.631326	0	0	0.121547	0	0	0.135015	0	0	0.0723966	0	0	0	0	0	0	0	0	0	0	0.0187854	0.0116658	0	0	0	0	0	0
45887	PrT2-36	2.76722	1.01381	0.0202184	1.01381	0.0202184	0	0	0	0	1	0.000722087	0.0220236	0	0	0	0	0	0	0	0	0.60899	0	0	0.124289	0	0	0.146313	0	0	0.0818666	0	0	0	0	0	0	0	0	0	0	0.0165177	0.0136294	0	0	0	0	0	0
45891	PrT3-30	2.3815	1.02011	0.0186761	1.01988	0.0186008	0	0	0.000225921	7.53069e-05	1	0.000677762	0.0262821	0	0	0	0	0	0	0	0	0.594472	0.00429249	0	0.12034	0	0	0.151066	0	0	0.0856239	0	0	0	0	0	0	0	0	0	0	0.017923	0.0167934	0	0	0	0	0	0
45892	PrT3-33	22.8196	1.00668	0.0178174	1.00668	0.0178174	0	0	0	0	1	0.0155902	0.0512249	0	0	0	0	0	0	0	0	0.538976	0	0	0.169265	0	0	0.104677	0	0	0.122494	0	0	0	0	0	0	0	0	0	0	0.013363	0.0423163	0	0	0	0	0	0
45893	PrT3-36	2.80404	1.01281	0.01679	1.01281	0.01679	0	0	0	0	1	0.000994146	0.0269524	0	0	0	0	0	0	0	0	0.584668	0.00463935	0	0.128687	0	0	0.153209	0	0	0.0846128	0	0	0	0	0	0	0	0	0	0	0.0172319	0.0159063	0	0	0	0	0	0
45897	PrT4-30	2.87237	1.01541	0.0174097	1.01541	0.0174097	0	0	0	0	1	0.00117633	0.0338784	0	0	0	0	0	0	0	0	0.594518	0.00646983	0	0.114339	0	0	0.13716	0	0	0.0964592	0	0	0	0	0	0	0	0	0	0	0.0171745	0.0168216	0	0	0	0	0	0
45898	PrT4-33	2.74845	1.01609	0.0182805	1.01609	0.0182805	0	0	0	0	1	0.000856898	0.0233267	0	0	0	0	0	0	0	0	0.596972	0.00485576	0	0.121108	0	0	0.152147	0	0	0.0846425	0	0	0	0	0	0	0	0	0	0	0.0169475	0.0148529	0	0	0	0	0	0
45899	PrT4-36	2.46766	1.0145	0.0186486	1.0145	0.0186486	0	0	0	0	1	0.000810811	0.023964	0	0	0	0	0	0	0	0	0.584865	0.00522523	0	0.125135	0	0	0.156667	0	0	0.0873874	0	0	0	0	0	0	0	0	0	0	0.0167568	0.0154955	0	0	0	0	0	0
45903	PrT5-30	2.3773	1.01013	0.0193656	1.01013	0.0193656	0	0	0	0	1	0.00100167	0.0524207	0	0	0	0	0	0	0	0	0.910295	0	0	0.0097941	0	0	0	0	0	0	0	0	0	0	0	0	0	0	0	0	0	0	0	0	0	0	0	0
45904	PrT5-33	2.06804	1.00688	0.0170764	1.00688	0.0170764	0	0	0	0	1	0.000894055	0.036835	0	0	0	0	0	0	0	0	0.869379	0	0	0.0261064	0	0	0.019848	0	0	0.0163612	0	0	0	0	0	0	0	0	0	0	0	0	0	0	0	0	0	0
45905	PrT5-36	2.85831	1.00159	0.017669	1.00159	0.017669	0	0	0	0	1	0.00101937	0.0519878	0	0	0	0	0	0	0	0	0.910975	0	0	0.00690905	0	0	0	0	0	0	0	0	0	0	0	0	0	0	0	0	0	0	0	0	0	0	0	0
45909	PrT6-30	2.43228	1.01812	0.0183045	1.01812	0.0183045	0	0	0	0	1	0.000739577	0.0257927	0	0	0	0	0	0	0	0	0.615235	0	0	0.110289	0	0	0.156143	0	0	0.0758066	0	0	0	0	0	0	0	0	0	0	0.0167329	0.0150689	0	0	0	0	0	0
45910	PrT6-33	2.41789	1.01608	0.0191337	1.01608	0.0191337	0	0	0	0	1	0.00105646	0.0291114	0	0	0	0	0	0	0	0	0.603005	0	0	0.118441	0	0	0.144031	0	0	0.0849865	0	0	0	0	0	0	0	0	0	0	0.0204249	0.0159643	0	0	0	0	0	0
45911	PrT6-36	2.73839	1.00796	0.0191806	1.00796	0.0191806	0	0	0	0	1	0.00117432	0.02988	0	0	0	0	0	0	0	0	0.603993	0	0	0.117432	0	0	0.144833	0	0	0.0861169	0	0	0	0	0	0	0	0	0	0	0.0177453	0.0161795	0	0	0	0	0	0
45915	PrT7-30	2.35392	1.01118	0.0158966	1.01118	0.0158966	0	0	0	0	1	0.000524063	0.0298716	0	0	0	0	0	0	0	0	0.866626	0	0	0.00611407	0	0	0	0	0	0	0	0	0	0	0	0	0.0973884	0	0	0	0	0	0	0	0	0	0	0
45916	PrT7-33	2.10834	1.01148	0.0161303	1.01148	0.0161303	0	0	0	0	1	0.000481502	0.0291309	0	0	0	0	0	0	0	0	0.875211	0	0	0.00489527	0	0	0	0	0	0	0	0	0	0	0	0	0.0907632	0	0	0	0	0	0	0	0	0	0	0
45917	PrT7-36	2.95204	1.00742	0.0159555	1.00742	0.0159555	0	0	0	0	1	0.000556586	0.025974	0	0	0	0	0	0	0	0	0.877365	0	0	0.00695733	0	0	0	0	0	0	0	0	0	0	0	0	0.0897032	0	0	0	0	0	0	0	0	0	0	0
seq_accession																						883	965	9195	930	5444	9682	70735	2061	5893	66507	10912	10914	921	4911	10915	3660	2796	2054	4873	1845	2055	70739	8104	58464	3263	6081	2771	3525
meta_info_summary
data_set_info
[truncated: 88 more columns]

## Sheet: ITS2 seq
>A1
AATGGCCTCTTGAACGTGCATTGCGCTCTTGGGATATGCCTGAGAGCATGTCTGCTTCAGTGCTTCTACTTTCATTTTCTGCTGCTCTTGTTATCAGGAGCAGTGTTGCTGCATGCTTCTGCAAGTGGCACTGGCATGCTAAATATCAAGTTTTGCTTGCTGTTGTGACTGATCAACATCTCATGTCGTTTCAGTTGGCGAAACAAAAGCTCATGTGTGTTCTTAACACTTCCTA
>A1g
AATGGCCTCTTGAACGTGCATTGTGCTCTTGGGATATGCCTGAGAGCATGTCTGCTTCAGTGCTTCTACTTTCATTTTCTGCTGCTCTTGTTATCAGGAGCAGTGTTGCTGCATGCTTCTGCAAGTGGCACTGGCATGCTAAATATCAAGTTTTGCTTGCTGTTGTGACTGATCAACATCTCATGTCGTTTCAGTTGGCGAAACAAAAGCTCATGTGTGTTCTTAACACTTCCTA
>A1dv
AATGGCCTCTTGAACGTGCATTGCGCTCTTGGGATACGCCTGAGAGCATGTCTGCTTCAGTGCTTCTACTTTCATTTTCTGCTGCTCTTGTTATCAGGAGCAGTGTTGCTGCATGCTTCTGCAAGTGGCACTGGCATGCTAAATATCAAGTTTTGCTTGCTGTTGTGACTGATCAACATCTCATGTCGTTTCAGTTGGCGAAACAAAAGCTCATGTGTGTTCTTAACACTTCCTA
>A1z
AATGGCCTCTTGAATGTGCATTGCGCTCTTGGGATATGCCTGAGAGCATGTCTGCTTCAGTGCTTCTACTTTCATTTTCTGCTGCTCTTGTTATCAGGAGCAGTGTTGCTGCATGCTTCTGCAAGTGGCACTGGCATGCTAAATATCAAGTTTTGCTTGCTGTTGTGACTGATCAACATCTCATGTCGTTTCAGTTGGCGAAACAAAAGCTCATGTGTGTTCTTAACACTTCCTA
>A1l
AATGGCCTCTTGAACGTGCATTGTGCTCTTGGGATATGCCTGAGAGCATGTCTGCTTCAGTGCTTCTACTTTCATTTTCTGCTGCTCTTGTTATCAGGAGCAGTGTTGCTGCATGCTTCTGCAAGTGGCACTGGCATGCTAAATATCAAGTTTTGCTTGCTGTTGTGACTGATCAACATCTCATGTCGTTTCAATTGGCGAAACAAAAGCTCATGTGTGTTCTTAACACTTCCTA
>A1dw
AATGGCCGCTTGAACGTGCATTGCGCTCTTGGGATATGCCTGAGAGCATGTCTGCTTCAGTGCTTCTACTTTCATTTTCTGCTGCTCTTGTTATCAGGAGCAGTGTTGCTGCATGCTTCTGCAAGTGGCACTGGCATGCTAAATATCAAGTTTTGCTTGCTGTTGTGACTGATCAACATCTCATGTCGTTTCAGTTGGCGAAACAAAAGCTCATGTGTGTTCTTAACACTTCCTA
>A1ds
AATGGCCTCTTGAACGTGCATTGCGCTCTTGGGATATGCCTGAGAGCATGTCTGCTTCAGTGCTTCTACTTTCATTTTCTGCTGCTCTTGTTATCAGGAGCAGTGTTGCTGCATGCTTCTGCAAGTGGCACTGGCATGCTAAATATCAAGTTTTGCTTGCTGTTGTGACTGATATCAACATCTCATGTCGTTTCAGTTGGCGAAACAAAAGCTCATGTGTGTTCTTAACACTTCCTA
>A1cl
AATGGCCTCTTGAACGTGCATTGCGCTCTTGGGATATGCCTGAGAGCATGTCTGCTTCAGTGCTTCTACTTTCATTTTCTGCTGCTCTTGTTATCAGGAGCAGTGTTGCTGCATGCTTCTGCAAGTGGCACTGGCATGCTAAACATCAAGTTTTGCTTGCTGTTGTGACTGATCAACATCTCATGTCGTTTCAGTTGGCGAAACAAAAGCTCATGTGTGTTCTTAACACTTCCTA
>A1cr
AATGGCCTCTTGAACGCGCATTGCGCTCTTGGGATATGCCTGAGAGCATGTCTGCTTCAGTGCTTCTACTTTCATTTTCTGCTGCTCTTGTTATCAGGAGCAGTGTTGCTGCATGCTTCTGCAAGTGGCACTGGCATGCTAAATATCAAGTTTTGCTTGCTGTTGTGACTGATCAACATCTCATGTCGTTTCAGTTGGCGAAACAAAAGCTCATGTGTGTTCTTAACACTTCCTA
>A1dr
AATGGCCTCTTGAACGTGCATTGCGCTCTTGGGATATGCCTGAGAGCATGTCTGCTTCAGTGCTTCTACTTTCATTTTCTGCTGCTCTTGTTATCAGGAGCAGTGTTGCTGCATGCTTCTGCAAGTGGCACTGGCATGCTAAATATCAAGTTTTGCTTGCTGTTGTGACTGATCAACATCTCATGTCGTTTCAGTTGGCGAAACAAAAGCTCATGTGTGTTTTAACACTTCCTA
>A1o
AATGGCCTCTTGAACGCGCATTGCGCTCTTGGGATATGCCTGAGAGCATGTCTGCTTCAGTGCTTCTACTTTCATTTTCTGCTGCTCTTGTTATCAGGAGCAGTGTTGCTGCATGCTTCTGCAAGTGGCACTGGCATGCTAAATATCAAGTTTTGCTTGCTGTTGTGACTGATCAACATCTCATGCCGTTTCAGTTGGCGAAACAAAAGCTCATGTGTGTTCTTAACACTTCCTA
>A1dp
AATGGCCTCTTGAACGTGCATTGTGCTCTTGGGATATGCCTGAGAGCATGTCTGCTTCAGTGCTTCTACTTTCATTTTCTGCTGCTCTTGTTATCAGGAGCAGTGTTGCTGCATGCTTCTGCAAGTGGCACTGGCATGCTAAATATCAAGTTTTGCTTGCTGTTGTGACTGATCAACATCTCATGCCGTTTCAGTTGGCGAAACAAAAGCTCATGTGTGTTCTTAACACTTCCTA
>A1p
AATGGCCTCTTGAACGTGCATTGCGCTCTTGGGATATGCCTGAGAGCATGTCTGCTTCAGTGCTTCTACTTTCATTTTCTGCTGCTCTTGTTATCAGGAGCAGTGTTGCTGCATGCTTCTGCAAGTGGCACTGGCATGCTAAATATCAAGTTTTGCTTGCTGTTGTGACTGATCAACATCTCATGTCGTTTCAATTGGCGAAACAAAAGCTCATGTGTGTTCTTAACACTTCCTA
>A1dl
AATGGCCTCTTGAACGTGCATTGCGCTCTTGGGATATGCCTGAGAGCATGTCTGCTTCAGTGCTTCTACTTTCATTTTCTGCTGCTCTTGTTATCAGGAGCAGTGTTGCTGCATGCTTCTGCAAGTGGCACTGGCATGCTAAATATCAAGTTTTGCTTGCTGTTGTGACTGACCAACATCTCATGTCGTTTCAGTTGGCGAAACAAAAGCTCATGTGTGTTCTTAACACTTCCTA
>A1dq
AATGGCCTCTTGAACGCGCATTGCGCTCTTGGGATATGCCTGAGAGCATGTCTGCTTCAGTGCTTCTACTTTCATTTTCTGCTGCTCTTGTTATCAGGAGCAGTGTTGCTGCATGCTTCTGCAAGTGGCACTGGCATGCTAAATATCAAGTTTTGCTTGCTGTTGTGACTGATCAACATCTCATGTCGTTTCAATTGGCGAAACAAAAGCTCATGTGTGTTCTTAACACTTCCTA
>A1dn
AATGGCCTCTTGAACGTGCATTGCGCTCTTGGGATATGCCTGAGAGCATGTCTGCTTCAGTGCTTCTACTTTCATTTTCTGCTGCTCTTGTTATCAGGAGCAGTGTTGCTGCATGCTTCTGCAAGTGGCACTGGCATGCTAAATATCAAGTTTTGCTTGCTGTTGTGACTGATCAACATCTCATGCCGTTTCAGTTGGCGAAACAAAAGCTCATGTGTGTTCTTAACACTTCCTA
>A1dm
AATGGCCTCTTGAACGTGCATTGCGCGCTCTTGGGATATGCCTGAGAGCATGTCTGCTTCAGTGCTTCTACTTTCATTTTCTGCTGCTCTTGTTATCAGGAGCAGTGTTGCTGCATGCTTCTGCAAGTGGCACTGGCATGCTAAATATCAAGTTTTGCTTGCTGTTGTGACTGATCAACATCTCATGTCGTTTCAGTTGGCGAAACAAAAGCTCATGTGTGTTCTTAACACTTCCTA
>A1dt
AATGGCCTCTTGAACGTGCATTGCGCTCTTGGGATATGCCTGAGAGCATGTCTGCTTCAGTGCTTCTACTTTCATTTTCTGCTGCTCTTGTTATCAGGAGCAGTGTTGCTGCATGCTTCTGCAAGTGGCACTGGCATGCTAAATATCAAGTTTTGCTTGCTGTTGCGACTGATCAACATCTCATGTCGTTTCAGTTGGCGAAACAAAAGCTCATGTGTGTTCTTAACACTTCCTA
>A1am
AATGGCCTCTTGAACGTGCATTGCGCTCTTGGGATATGCCTGAGAGCATGTCTGCTTCAGTGCTTCTACTTTCATTTTCTGCTGCTCTTGTTATCAGAAGCAGTGTTGCTGCATGCTTCTGCAAGTGGCACTGGCATGCTAAATATCAAGTTTTGCTTGCTGTTGTGACTGATCAACATCTCATGTCGTTTCAGTTGGCGAAACAAAAGCTCATGTGTGTTCTTAACACTTCCTA
>A1dy
AATGGCCTCTTGAACGTGCATTGCGCTCTTGGGATATGCCTGAGAGCATGTCTGCTTCAGTGCTTCTACTTTCATTTTCTGCTGCTCTTGTTATCAGGAGCAGTGTTGCTGCATGCTTCTGCAAGTGGCACTGGCATGCTAAATATCAAGTTTTGCTTGCTATTGTGACTGATCAACATCTCATGTCGTTTCAGTTGGCGAAACAAAAGCTCATGTGTGTTCTTAACACTTCC
>A1bh
AATGGCCTCTTGAACGTGCATTGCGCTCTTGGGATATGCCTGAGAGCATGTCTGCTTCAGTGCTTCTACTTTCATTTTCTGCTGCTCTTGTTATCAGGAGCAGTGTTGCTGCATGCTTCTGCAAGTGGCACTGGCATGCTAAATATCAAGTTTTGCTTGCTGTTGTAACTGATCAACATCTCATGTCGTTTCAGTTGGCGAAACAAAAGCTCATGTGTGTTCTTAACACTTCCTA
>70739_A
AATGGCCTCTTGAATGTGCATTGCGCTCTTGGGATATGCCTGAGAGCATGTCTGCTTCAGTGCTTCTACTTTCATTTTCTGCTGCTCTTGTTATCAGGAGCAGTGTTGCTGCATGCTTCTGCAAGTGGCACTGGCATGCTAAATATCAAGTTTTGCTTGCTGTTGTGACTGATCAACATCTCATGTCGTTTCAGTTGGCGAAACAAAAGCTCATGTGTGTTTTAACACTTCCTA
>A1ct
AATGGCCTCTTGAACGTGCATTGCGCTCTTGGGATATGCCTGAGAGCATGTCTGCTTCAGTGCTTCTACTTTCATTTTCTGCTGCTCTTGTTATCAGGAGCAGTGTTGCTGCGTGCTTCTGCAAGTGGCACTGGCATGCTAAATATCAAGTTTTGCTTGCTGTTGTGACTGATCAACATCTCATGTCGTTTCAGTTGGCGAAACAAAAGCTCATGTGTGTTCTTAACACTTCCTA
>58464_A
ATGGCCTCTTGAACGTGCATTGCGCTCTTGGGATATGCCTGAGATCATGTCTGCTTCAGTGCTTCTACTTTCATTTTCTGCTGCTCTTGTTATCAGGAGCAGTGTTGCTGCATGCTTCTGCAAGTGGCACTGGCATGCTAAATATCAAGTTTTGCTTGCTGTTGTGACTGATCAACATCTCATGTCGTTTCAGTTGGCGAAACAAAAGCTCATGTGTGTTCTTAACACTTCCTA
>3263_A
AATGGCCTCTTGAACGTGCATTGCGCTCTTGGGATATGCCTGAGAGCATATCTGCTTCAGTGCTTCTACTTTCATTTTCTGCTGCTCTTGTTATCAGGAGCAGTGTTGCTGCATGCTTCTGCAAGTGGCACTGGCATGCTAAATATCAAGTTTTGCTTGCTGTTGTGACTGATCAACATCTCATGTCGTTTCAGTTGGCGAAACAAAAGCTCATGTGTGTTCTTAACACTTCCTA
>6081_A
AATGGCCTCTTGAACGTGCATTGCGCTCTTGGGATATGCCTGAGAGCATGTCTGCTTCAGTGCTTCTACTTTCATTTTCTGCTGCTCTTGTTATCAGGAGCAGTGTTGCTGCATGCTTCTGCAAGTGGCACTGGCATGCTACATATCAAGTTTTGCTTGCTGTTGTGACTGATCAACATCTCATGTCGTTTCAGTTGGCGAAACAAAAGCTCATGTGTGTTCTTAACACTTCCTA
>2771_A
AATGGCCTCTTGAACGTGCATTGCGCTCTTGGGATATGGCCTGAGAGCATGTCTGCTTCAGTGCTTCTACTTTCATTTTCTGCTGCTCTTGTTATCAGGAGCAGTGTTGCTGCATGCTTCTGCAAGTGGCACTGGCATGCTAAATATCAAGTTTTGCTTGCTGTTGTGACTGATCAACATCTCATGTCGTTTCAGTTGGCGAAACAAAAGCTCATGTGTGTTCTTAACACTTCCTA
>3525_A
AATGGCCTCTTGAACGTGCATTGCGCTCTTGGGATATGCCTGAGAGCATGTCTGCTTCAGTGCTTCTACTTTCATTTTCTGCTGCTCTTGTTATCAGGAGCAGTGTTGCTGCATGCTTCTGCAAGTGGCACTGGCATGCTAAATATCAAGTTTTGCTTGCTGTTGTGACTGATCAACATCTCATGTCGTTTCGGTTGGCGAAACAAAAGCTCATGTGTGTTCTTAACACTTCCTA
>12061_A
AATGGCCTCTTGAACGTGCATTGCGCTCTTGGGATATGCCTGAGAGCATGTCTGCTTCAGTGCTTCTACTTTCATTTTCTGCTGCTCTTGTTATCAGGAGCAGTGTTGCTGCATGCTTCTGCAAGTGGCACTGGCATGCTAAATATCAAGTTTTGCTTGCTGTTGTGACTGATCAACATCTCATGTCGTTTCAGTTGGCGAAACAAAAGCTCATGTTTGTTCTTAACACTTCCTA
>A1do
AATGGCCTCTTGAACGTGCATTGCGCTCTTGGGATATGCCTGAGAGCATGTCTGCTTCAGTGCTTCTACTTTCATTTTCTGCTGCTCTTGTTATCAGGAGCAGTGTTGCTGCATGCTTCTGCAAGTGGCACTGGCATGCTAAATATCAAGTTTTGCTTGCTGTTGTGACTGATCAACATCTCATGTTGTTTCAGTTGGCGAAACAAAAGCTCATGTGTGTTCTTAACACTTCCTA
>70740_A
AATGGCCTCTTGAACGTGCATTGCGCTCTTGGGATATGCCTGAGAGCATGTCTGCTTCAGTGCTTCTACTTTCATTTTCTGCTGCTCTTGTTATCAGGAGCAGTGTTGCTGCATGCTTCTGCAAGTGGCACTGGCATGCTAAATATCAAGTTTTGCTTGCTGTTGTGACTGATATCAACATCTCATGTCGTTTCAGTTGGCGAAACAAAAGCTCATGTGTGTTTTAACACTTCCTA
>30814_A
AATGGCTTCTTGAACGTGCATTGCACTCTTGGGATATGCCTGAGAGCATGTCTGCTTCAGTGCTTCTACTTTCATCTTCTGCTGCTCTTGTTATCAGGAGCGGTGTTGCTGCATGCTTCTGCAAGTGGCACTGGCATGCTAAATATCAAGTTTTGCTAGCTGTTGTGACTGATCAACATCTCATGTCGTTTCAGTTGGCGAAACACAAGCTCATGTGTGTTCTTAACACTTCCTA
>70812_A
AATGGCCTCTTGAACGTGCATTGCGCTCTTGGGATATGCCTGAGAGCATGTCTGCTTCAGTGCTTCTACTTTCATTTTCTGCTGCTCTTGTTATCAGGAGCAGTGTTGCTGCAAGTGGCACTGGCATGCTAAATATCAAGTTTTGCTTGCTGTTGTGACTGATCAACATCTCATGTCGTTTCAGTTGGCGAAACAAAAGCTCATGTGTGTTCTTAACACTTCCTA
>70792_A
AATGGCCTCTTGAACGTGCATTGCGCTCTTGGGATACGCCTGAGAGCATGTCTGCTTCAGTGCTTCTACTTTCATTTTCTGCTGCTCTTGTTATCAGGAGCAGTGTTGCTGCATGCTTCTGCAAGTGGCACTGGCATGCTAAATATCAAGTTTTGCTTGCTGTTGTGACTGACCAACATCTCATGTCGTTTCAGTTGGCGAAACAAAAGCTCATGTGTGTTCTTAACACTTCCTA
>9429_A
AATGGCCTCTTGAACGTGCATTGCGCTCTTGGGATATGCCTGAGAGCATGTCTGCTTCAGTGCTTCTACTTTCATTTTCTGCTGCTCTTGTTATCAGGAGCAGTGTTGCTGCATGCTTCTGCAAGTGGCACTGGCATGCTAAATATCAAGTTTTGCTTGCTGTTGTGACTGATCAACATCTCATGTCGTTTCAGTTGGCGAAACAAAAGCTCATGTGTGTTTCTTAACACTTCCTA
>A1du
AATGGCCTCTTGAACGTGCATTGCGCTCTTGGGATATGCCTGAGAGCATGTCTGCTTCAGTGCTTCTACTTTCATTTTCTGCTGCTCTTGTTATCAGGAGCAGTGTTGCTGCATGCTTCTGCAAGTGGCACTGGCATGCTAAATATCAAGCTTTGCTTGCTGTTGTGACTGATCAACATCTCATGTCGTTTCAGTTGGCGAAACAAAAGCTCATGTGTGTTCTTAACACTTCCTA
>70795_A
AATGGCCTCTTGAACGTGCATTGCGCTCTTGGGATATGCCTGAGAGCATGTCTGCTTCAGTGCTTCTACTTTCATTTTCTGCTGCTCTTGTTATCAGAAGCAGTGTTGCTGCATGCTTCTGCAAGTGGCACTGGCATGCTAAATATCAAGTTTTGCTTGCTGTTGTGACTGATCAACATCTCATGTTGTTCCAGTTGGCGAAACAAAAGCTCATGTGTGTTCTTAACACTTCCTA
>70793_A
AATGGCCGCTTGAACGTGCATTGCGCTCTTGGGATACGCCTGAGAGCATGTCTGCTTCAGTGCTTCTACTTTCATTTTCTGCTGCTCTTGTTATCAGGAGCAGTGTTGCTGCATGCTTCTGCAAGTGGCACTGGCATGCTAAATATCAAGTTTTGCTTGCTGTTGTGACTGATCAACATCTCATGTCGTTTCAGTTGGCGAAACAAAAGCTCATGTGTGTTCTTAACACTTCCTA
>70791_A
AATGGCCGCTTGAACGTGCATTGCGCTCTTGGGATATGCCTGAGAGCATGTCTGCTTCAGTGCTTCTACTTTCATTTTCTGCTGCTCTTGTTATCAGGAGCAGTGTTGCTGCATGCTTCTGCAAGTGGCACTGGCATGCTAAATATCAAGTTTTGCTTGCTGTTGTGACTGACCAACATCTCATGTCGTTTCAGTTGGCGAAACAAAAGCTCATGTGTGTTCTTAACACTTCCTA
>A1dz
AATGGCCTCTTGAACGTGCATTGCGCTCTTGGGATATGCCTGAGAGCATGTCTGCTTCAGTGCTTCTACTTTCATTTTCTGCTGCTCTTGTTATCAGGAGCAGTGTTGCTGCATGCTTCTGCAAGTGGCACTGGCATGCTAAATATCAAGTTTTGCTTGCTGTTGTGACTGATCAACATCTCATGTCGTTTCAGTTGGCGAAACAAAAACTCATGTGTGTTCTTAACACTTCCTA
>A1dx
AATGGCCTCTTGAACGTGCATTGCGCGCGCTCTTGGGATATGCCTGAGAGCATGTCTGCTTCAGTGCTTCTACTTTCATTTTCTGCTGCTCTTGTTATCAGGAGCAGTGTTGCTGCATGCTTCTGCAAGTGGCACTGGCATGCTAAATATCAAGTTTTGCTTGCTGTTGTGACTGATCAACATCTCATGTCGTTTCAGTTGGCGAAACAAAAGCTCATGTGTGTTCTTAACACTTCCTA
>70790_A
AATGGCCTCTTGAACGTGCATTGCGCTCTTGGGATATGCCTGAGAGCATGTCTGCTTCAGTGCTTCTACTTTCATTTTCTGCTGCTCTTGTTATCAGAAGCAGTGTTGCTGCATGCTTCTGCAAGTGGCACTGGCATGCTAAATATTAAGTTTTGCTTGCTGTTGTGACTGATCAACATCTCATGTCGTTTCAGTTGGCGAAACAAAAGCTCATGTGTGTTCTTAACACTTCCTA
>1842_A
AATGGCCTCTTGAACGTGCATTGCGCTCTTGGGATATGCCTGAGAGCATGTCTGCTTCAGTGCTTCTACTTTCATTTTCTGCTGCTCTTGTTATCAGGAGCAGTGTTGCTGCATGCTTCTGCAAGTGGCACTGGCATGCTAAATATCAAGTTTTGCTTGCTGTTGTGACTGATCAACATCTCATGTCGTTTCAGTTGGCGAAACAAAAGCTCATGCGTGTTCTTAACACTTCCTA
>6528_A
AATGGCCTCTTGAACGTGCATTGCGCTCTTGGGATATGCCTGAGAGCATGTCTGCTTCAGTGCTTCTACTCTCATTTTCTGCTGCTCTTGTTATCAGGAGCAGTGTTGCTGCATGCTTCTGCAAGTGGCACTGGCATGCTAAATATCAAGTTTTGCTTGCTGTTGTGACTGATCAACATCTCATGTCGTTTCAGTTGGCGAAACAAAAGCTCATGTGTGTTCTTAACACTTCCTA
>7367_A
AATGGCCTCTTGAACGTGCATTGCGCTCTTGGGATATGCCTGAGAGCATGTCTGCTTCAGTGCTTCTACTTTCATTTTCTGCTGCTCTTGTTATCAGGAGCAGTGTTGCTGCATGCTTCTGCAAGTGGCACTGGCATGCTAAATATCAAGTTTTGCTTGCTGTTGTGACTGATCAACATGTCATGTCGTTTCAGTTGGCGAAACAAAAGCTCATGTGTGTTCTTAACACTTCCTA
>2932_A
AATGGCCTCTTGAACGTGCATTGCGCTCTTGGGATATGCCTGAGAGCATGTCTGCTTCAGTGCTTCTACTTTCATTTTCTGCTGCTCTTGTTATCAGGAGCAGTGTTGCTGCATGCTTCTGCAAGTGGCACTGGCATGCTAAATATCAAGTTTTGCTTGCTGTTGTGACTGATCAACATCTCATGTCGTTTCAGTTGGCGAAGCAAAAGCTCATGTGTGTTCTTAACACTTCCTA
>70794_A
AATGGCCTCTTGAACGAGCATTGCTCTCTTGGGATATGCCTGAGAGCATGTCTGCTTCAGTGCTTCTACTCTCATTTTCTGCTGCTCTTGTTATCAGGAGCAGTGTTGCTGCATGCTTCTGCAAGTGGCACTGGCATGCTAAATATCAAGTTTTGCTTGCTGTTGTGACTGATCAACATCTCATGTCGTTTCAGTTGGCGAAACAAAAGCTCATGTGTGTTCTTAACACTTCCTA
>70814_A
AATGGCCTCTTGAACGTGCATTGCGCTCTTGGGATATGCCTGAGAGCATGTCTGCTTCAGTGCTTCTACTTTCATTTTCTGCTGCTCTTGTTATCAGGAGCAGTGTTGCTGCATGCTTCTGCAAGTGGCACTGGCATGCTACATATCAAGTTTTGCTTGCTGTTGTGACTGATCAACATCTCATGTCGTTTCAGTTGGCGAAACAAAAGCTCATGCGTGTTCTTAACACTTCCTA
>70798_A
AATGGCCTCTTGAACGTGCATTGCGCTCTTGGGATATGCCTGAGAGCATGTCTGCTTCAGTGCTTCTACTTTCATTTTCTGCTGCTCTTGTTATCAGAAGCAGTGTTGCTGCATGCTTCTGCAAGTGGCACTGGCATGCTAAATATCAAGTTTTGCTTGCTGTTGTGACTGATCAACATCTCATGTTGTTTCAGTTGGCGAAACAAAAGCTCATGTGTGTTCTTAACACTTCCTA
>4527_A
AATGGCCTCTTGAACGTGCATTGCGCTCTTGGGATATGCCTGAGAGCAAGTCTGCTTCAGTGCTTCTACTTTCATTTTCTGCTGCTCTTGTTATCAGGAGCAGTGTTGCTGCATGCTTCTGCAAGTGGCACTGGCATGCTAAATATCAAGTTTTGCTTGCTGTTGTGACTGATCAACATCTCATGTCGTTTCAGTTGGCGAAACAAAAGCTCATGTGTGTTCTTAACACTTCCTA
>70796_A
AATGGCCTCTTGAACGTGCATTGCGCTCTTGGGATATGCCTGAGAGCATGTCTGCTTCAGTGCTTCTACTTTCATTTTCTGCTGCTCTTGTTATCAGGAGCAGTGTTGCTGCATGCTTCTGCAAGTGGCACTGGCATGCTAAATATCAAGTTTTGCTTGCTGTTGTGACTGATCAACATCTCATGTTGTTCCAGTTGGCGAAACAAAAGCTCATGTGTGTTCTTAACACTTCCTA
>8504_A
AATGGCCTCTTGAACGTGCATTGCGCTCTTGGGATATGCCTGAGAGCATGTCTGCTTCAGTGCTTCTACTTTCATTTTCTGCTGCTCTTGTTATCAGGAGCAGTGTTGCTGCATGCTTCTGCAAGTGGCACTGGCATGCTAAATATCAAGTTTTGCTTGCTGTTGTGACTGATCAACATCTCATGTCGTTACAGTTGGCGAAACAAAAGCTCATGTGTGTTCTTAACACTTCCTA
>A1ea
AATGGCCTCTTGAACGTGCATTGCGCTCTTGGGATATGCCTGAGAGCATGTCTGCTTCAGTGCTTCTACTTTCATTTTCTGCTGCTCTTGTTATCAGGAGCAGTGTTGCTGCATGCTTCTGCAAGTGGCACTGGCATGCTAAATATCAAGTTTTGCTTGCTGTTGTGACTGATTAACATCTCATGTCGTTTCAGTTGGCGAAACAAAAGCTCATGTGTGTTCTTAACACTTCCTA
>10098_A
AATGGCCTCTTGAACGTGCATTGCGCTCTTGGGATATTGTCTGAGAGCATGTCTGCTTCAGTGCTTCTACTTTCATTTTCTGCTGCTCTTGTTATCAGGAGCAGTGTTGCTGCATGCTTCTGCAAGTGGCACTGGCATGCTAAATATCAAGTTTTGCTTGCTGTTGTGACTGATCAACATCTCATGTCGTTTCAGTTGGCGAAACAAAAGCTCATGTGTGTTCTTAACACTTCCTA
>10096_A
AATGGCCTCTTGAACGTGCATTGCGCTCTTGGGATATGCCTGAGAGCATGTCTGCTTCAGTGCTTCTACTTTCATTTTCTGCTGCTCTTGTTATCAGGAGCAGTGTTGCTGCATGCTTCTGCAATTGGCACTGGCATGCTAAATATCAAGTTTTGCTTGCTGTTGTGACTGATCAACATCTCATGTCGTTTCAGTTGGCGAAACAAAAGCTCATGTGTGTTCTTAACACTTCCTA
>10672_A
AATGGCCTCTTGAACGTGCATTGCGCTCTTGGGATATGCCTGAGAGCATGTCTGCTTCAGTGCTTCTACTTTCATTTTCTGCTGCTCTTGTTATCAGGAGCAGTGTTGCTGCATGCTTCTGCAAGTGGCACTGGCATGCTAAATATCAAGTTTTGCTTGCTGTTGTGACTGATCAACATCTCATGTCGTTTCAGTGGGCGAAACAAAAGCTCATGTGTGTTCTTAACACTTCCTA
>54515_A
AATGGCTTCTTGAACGTGCATTGCACTCTTGGGATATGCCTGAGAGCATGTCTGCTTCAGTGCTTCTACTTTCATCTTCTGCTGCTCTTGTTATCAGGAGCGGTGTTGCTGCATGCTTCTGCAAGTGGCACTGGCATGCTAAATATCAAGTTTTGCTTGCTGTTGTGACTGATCAACATCTCATGTCGTTTCAGTTGGCGAAACAAAAGCTCATGTGTGTTCTTAACACTTCCTA
>3056_A
AATGGCCTCTTGAACGTGCATTGCGCTCTTGGGATATGCCTGAGAGCATGTCTGCTTCAGTGCTTCTACTTTCATTTTCTGCTGCTCTTGCTATCAGGAGCAGTGTTGCTGCATGCTTCTGCAAGTGGCACTGGCATGCTAAATATCAAGTTTTGCTTGCTGTTGTGACTGATCAACATCTCATGTCGTTTCAGTTGGCGAAACAAAAGCTCATGTGTGTTCTTAACACTTCCTA
>54877_A
ATGGCTTCTTGAACGTGCATTGCACTCTTGGGATATGCCTGAGAGCATGTCTGCTTCAGTGCTTCTACTTTCATTTTCTGCTGCTCTTGTTATCAGGAGCAGTGTTGCTGCATGCTTCTGCAAGTGGCACTGGCATGCTAAATATCAAGTTTTGCTTGCTGTTGTGACTGATCAACATCTCATGTCGTTTCAGTTGGCGAAACAAAAGCTCATGTGTGTTCTTAACACTTCCTA
>54878_A
ATGGCCTCTTGAACGTGCATTGCGCTCTTGGGATATGCCTGAGAGCATGTCTGCTTCAGTGCTTCTACTTTCATTTTCTGCTGCTCTTGTTATCAGGAGCAGTGTTGCTGCATGCTTCTGCAAGTGGCACTGGCATGCTAAATATCAAGTTTTGCTAGCTGTTGTGACTGATCAACATCTCATGTCGTTTCAGTTGGCGAAACACAAGCTCATGTGTGTTCTTAACACTTCCTA
>3515_A
AATGGCCTCTTGAACGTGCATTGCGCTCTTGGGATATGCCTGAGAGCATGTCTGCTTCAGTGCTTCTACTTTCATTTTCTGCTGCTCTTGTTATCAGGAGCAGTGTTGCTGCATGCTTCTGCAAGTGGCACTGGCATGCTAAATATCATGTTTTGCTTGCTGTTGTGACTGATCAACATCTCATGTCGTTTCAGTTGGCGAAACAAAAGCTCATGTGTGTTCTTAACACTTCCTA
>70808_A
AATGGCCTCTTGAACGTGCATTGCGCTCTTGGGATATGCCTGAGAGCATGTCTGCTTCAGTGCTTCTACTTTCATTTTCTGCTGCTCTTGTTATCAGGAGCAGTGTTGCTGCGTGCTTCTGCAAGTCGCACTGGCATGCTAAATATCAAGTTTTGCTTGCTGTTGTGACTGATCAACATCTCATGTCGTTTCAGTTGGCGAAACAAAAGCTCATGTGTGTTCTTAACACTTCCTA
>16790_A
AATGGCCTCTTGAACGTGCATTGCGCTCTTGGGATATGCCTGAGAGCATGTCTGCTTCAGTGCTTCTACTTTGATTTTCTGCTGCTCTTGTTATCAGGAGCAGTGTTGCTGCATGCTTCTGCAAGTGGCACTGGCATGCTAAATATCAAGTTTTGCTTGCTGTTGTGACTGATCAACATCTCATGTCGTTTCAGTTGGCGAAACAAAAGCTCATGTGTGTTCTTAACACTTCCTA
>9390_A
AATGGCCTCTTGAACGTGCATTGCGCTCTTGGGATATGCCTGAGAGCATGTCTGCTTCAGTGCTTCTACTTTCATTTTCTGCTGCTCTTGTTATCAGGAGCAGTGTTGCTGCATGCTTCTGCAAGTGGCACTGGCATGCTGAATATCAAGTTTTGCTTGCTGTTGTGACTGATCAACATCTCATGTCGTTTCAGTTGGCGAAACAAAAGCTCATGTGTGTTCTTAACACTTCCTA
>70742_A
AATGGCCTCTTGAACGTGCATTGCGCTCTTGAGATATGCCTGAGAGCATGTCTGCTTCAGTGCTTCTACTTTCATTTTCTGCTGCTCTTGTTATCAGGAGCAGTGTTGCTGCATGCTTCTGCAAGTGGCACTGGCATGCTAAATATCAAGTTTTGCTTGCTGTTGTGACTGATCAACATCTCATGTCGTTTCAGTTGGCGAAACAAAAGCTCATGTGTGTTCTTAACACTTCCTA
>70741_A
AATGGCCTCTTGAACGTGCATTGCGCTCTTGGGATATGCCTGAGAGCATGTCTGCTTCAGTGCTTCTACTTTCATTTTCTGCTGCTCTTGTTATCAGGAGCAGTGTTGCTGCATGCTTCTGCAAGTGGCACTGGCATGCTAAATATCAAGTTTTGCTTGCTGTTGTGACTGATCAACATCTCATGTCGTTTCAGTTGAACCCGCCGAACATCTCATGTCGTTTCAGTTGGCGAAACAAAAGCTCATGTGTGTTCTTAACACTTCCTA
>70815_A
AATGGCCTCTTGAACGTGCATTGCGCTCTTGGGAGCTTCAGTGCTTCTACTTTCATTTTCTGCTGCTCTTGTTATCAGGAGCAGTGTTGCTGCATGCTTCTGCAAGTGGCACTGGCATGCTAAATATCAAGTTTTGCTTGCTGTTGTGACTGATCAACATCTCATGTCGTTTCAGTTGGCGAAACAAAAGCTCATGTGTGTTCTTAACACTTCCTA
>55166_A
ATGGCCTCTTGAACGTGCATTGCGCTCTTGGGATATGCCTGAGAGCATGTCTGCTTCAGTGCTTCTACTTTCATTTTCTTCTGCTCTTGTTATCAGGAGCAGTGTTGCTGCATGCTTCTGCAAGTGGCACTGGCATGCTAAATATCAAGTTTTGCTTGCTGTTGTGACTGATCAACATCTCATGTCGTTTCAGTTGGCGAAACAAAAGCTCATGTGTGTTCTTAACACTTCCTA
>13902_A
AATGGCCTCTTGAACGTGCATTGCGCTCTTGGGATATGCCTGAGAGCATGTCTGCTTCAGTGCTTCTACTTTCATTTTCTGCTGCTCTTGTTATCAGGAGCAGTGTTGCTGCATGCTTCTGCAAGTGGCACTGGCATGCTAAATATCAAGTTTTGCTTGCTGTTGTGACTGATCAACATCTCATGTCGTTTCAGTTGGCGAAACAAAAGCTCATGTGTGTTCTTAACACTTCCGA
>1042_A
AATGGCCTCTTGAACGTGCATTGCGCTCTTGGGATATGCCTGAGAGCATGTCTGCTTCAGTGCTTCTACTTTCATTTTCTGCTGCTCTTGTTATCAGGAGCAGTGTTGCTGCATGCTTCTGCAAGTGGCACTGGCATGCTAAATATCAAGTTTTGCTTGCTGTTGTGACTGATCAACATCTCATGTCGTTTCAGTTGGCGAAACAAAAGCTCATGTGTGTTCTCAACACTTCCTA
>10539_A
AATGGCCTCTTGAACGTGCATTGCGCTCTTGGGATATGCCTGAGAGCATGTCTGCTTCAGTGCTTCTACTTTCATTTTCTGCTGCTCTTGTTATCAGGAGCAGTGTTGCTGCATGCTTCTGCAAGTGGCACTGGCATGCTAAATATCAAGTTTTGCTTGCTGTTGTGACTGATCAACATCTCATGTCGTTTCAGTTGGCGTAACAAAAGCTCATGTGTGTTCTTAACACTTCCTA
>1481_A
AATGGCCCCTTGAACGTGCATTGCGCTCTTGGGATATGCCTGAGAGCATGTCTGCTTCAGTGCTTCTACTTTCATTTTCTGCTGCTCTTGTTATCAGGAGCAGTGTTGCTGCATGCTTCTGCAAGTGGCACTGGCATGCTAAATATCAAGTTTTGCTTGCTGTTGTGACTGATCAACATCTCATGTCGTTTCAGTTGGCGAAACAAAAGCTCATGTGTGTTCTTAACACTTCCTA
>70801_A
AATGGCCTCTTGAACGTGCATTGCGCTCTTGGGATATGCCTGAGAGCATGTCTGCTTCAGTGCTTCTACTTTCATTTTCTGCTGCTCTTGTTATCAGGAGCAGTGTTGCTGCATGCTTCTGCAAGTGGCACTGGCATGCTAAATATCAAATTTTGCTTGCTGTTGTGACTGATCAACATCTCATGTCGTTTCAGTTGGCGAAACAAAAGCTCATGTGTGTTTCTTAACACTTCCTA
>55719_A
ATGGCCTCTTGAACGTGCATTGCGCTCTTGGGATATGCCTGAGAGCATGTCTGCTTCAGTGCTTCTACTTTCATTTTCTGCTGCTCTTGTTATCAGGAGCAGTGTTGCTGCATGCTTCTGCAAGTGGCACTGGCATGCTAAATATCAAGTTTTGCTTGCTGTTGTGACTGATCAACATCTCATGTCCTTTCAGTTGGCGAAACAAAAGCTCATGTGTGTTCTTAACACTTCCTA
>70805_A
AATGGCCTCTTGAAGGTGCATTGCGCTCTTGGGATATGCCTGAGAGCATGTCTGCTTCAGTGCTTCTACTTTCATTTTCTGCTGCTCTTGTTATCAGGAGCAGTGTTGCTGCATGCTTCTGCAAGTGGCACTGGCATGCTAAACATCAAGTTTTGCTTGCTGTTGTGACTGATCAACATCTCATGTCGTTTCAGTTGGCGAAACAAAAGCTCATGTGTGTTCTTAACACTTCCTA
>8177_A
AATGGCCTCTTGAACGTGCATTGCGCTCTTGGGATATGCCTGAGAGCATGTCTGCTTCAGTGCTTCTACTTTCATTTTCTGCTGCTCTTGTTATCAGGAGCAGTGTTGCTGCATGCTTCTGCAAGTGGCACTGGCATGCTAAATATCAAGTTTTGCTTGCTGTTGTGACTGATCAACATCTCATGTCGTTTCAGTTGGCGAAACACAAGCTCATGTGTGTTCTTAACACTTCCTA
>70797_A
AATGGCCTCTTGAACGTGCATTGCGCTCTTGGGATACGCCTGAGAGCATGTCTGCTTCAGTGCTTCTACTTTCATTTTCTGCTGCTCTTGTTATCAGGAGCAGTGTTGCTGCATGCTTCTGCAAGTGGCACTGGCATGCTAAATATCAAGTTTTGCTTGCTGTTGTGACTGATCAACATCTCATGTTGTTCCAGTTGGCGAAACAAAAGCTCATGTGTGTTCTTAACACTTCCTA
>70810_A
AATGGCCTCTTGAACGTGCATTGCGCTCTTGGGATACGCCTGAGAGCATGTCTGCTTCAGTGCTTCTACTTTCATTTTCTGCTGCTCTTGTTATCAGGAGCAGTGTTGCTGCATGCTTCTGCAAGTGGCACTGGCATGCTAAATATCAAGTTTTGCTTGCTGTTGTGACTGATCAACATCTCATGTCGTTTCAGTTGGCGAAACAAAAACTCATGTGTGTTCTTAACACTTCCTA
>70804_A
AATGGCCTCTTGAACGTGCATTGCGCTCTTGGGATATGCCTGAGAGCATGTCTGCTTCAGTGCTTCTACTTTCATTTTCTGCTGCTCTTGTTATCAGAAGCAGTGTTGCTGCATGCTTCTGCAAGTGGCACTGGCATGCTAAATATCAAGTTTTGCTTGCTGTTGTGACTGATCAACATCTCATGTTGTTTCAGTTGGGGAAACAAAAGCTCATGTGTGTTCTTAACACTTCCTA
>70813_A
AATGGCCTCTTAAACGTGCATTGCGCTCTTGGGATATGCCTGAGAGCATGTCTGCTTCAGTGCTTCTACTTTCATTTTCTGCTGCTCTTGTTTTCAGGAGCAGTGTTGCTGCATGCTTCTGCAAGTGGCACTGGCATGCTAAATATCAAGTTTTGCTTGCTGTTGTGACTGATCAACATCTCATGTCGTTTCAGTTGGCGAAACAAAAGCTCATGTGTGTTCTTAACACTTCCTA
>54511_A
AATGGCCTCTTGAACGTGCGTTGCGCTCTTGGGATATGCCTGAGAGCATGTCTGCTTCAGTGCTTCTACTTTAATTTTCTGCTGCTCTTGTTATCAGGAGCAGTGTTGCTGCATGCTTCTGCAAGTGGCACTGGCATGCTAAATATCAAGTTTTGCTTGCTGTTGTGACTGATCAACATCTCATGTCGTTTCAGTGGGCGAAACAAAAGCTCATGTGTGTTCTTAACACTTCCTA
>70807_A
AATGGCCTCTTGAACGTGCATTGCGCTCTTGGGATATGCCTGAGATCATGTCTGCTTCAGTGCTTCTACTTTCATTTTCTGCTGCTCTTGTTATCAGGAGCAGTGTTGCTGCATGCTTCTGCAAGTGGCACTGGCATGCTAAATATCAAGCTTTGCTTGCTGTTGTGACTGATCAACATCTCATGTCGTTTCAGTTGGCGAAACAAAAGCTCATGTGTGTTCTTAACACTTCCTA
>3283_A
AATGGCCTCTTGAACGTGCATTGCGCTCTTGGGATATGCCTGAGAGCATGTCTGCTTCAGTGCTTCTACTTTCATTTTCTGCTGCTCTTGTTATCAGGAGCAGTGTTGCTGCATGCTTCTGCAAGTGGCATTGGCATGCTAAATATCAAGTTTTGCTTGCTGTTGTGACTGATCAACATCTCATGTCGTTTCAGTTGGCGAAACAAAAGCTCATGTGTGTTCTTAACACTTCCTA
>70803_A
AATGGCCTCTTGAACGTGCATTGCGCTCTTGGGATATGCCTGAGAGCATGTCTGCTTCAGTGCTTCTACTTTCATTTTCTGCTGCTCTTGTTATCAGGAGCAGTGTTGCTGCATGCTTCTGCAAGTGGCACTGGCATGCTAAATATCAAGTTTTGCTTGCTGTTGTGACTGATCAACATCTCATGTTGTTTCAGTTGGGGAAACAAAAGCTCATGTGTGTTCTTAACACTTCCTA
>60672_A
ATGGCCTCTTGAATGTGCATTGCGCTCTTGGGATATGCCTGAGAGCATGTCTGCTTCAGTGCTTCTACTTTCATTTTCTGCTGCTCTTGTTATCAGGAGCAGTGTTGCTGCATGCTTCTGCAAGTGGCACTGGCATGCTAAATATCAAGTTTTGCTTGCTGTTGTAACTGATCAACATCTCATGTCGTTTCAGTTGGCGAAACAAAAGCTCATGTGTGTTCTTAACACTTCCTA
>8512_A
AATGGCCTCTTGAACGTGCATTGCGCTCTTGGGATATGCCTGAGAGCATGTCTGCTTCAGTGCTTCTACTTTCATTTTCTGCTGCTCTTGTTATCAGGAGCAGTGTTGCTGCATGCTTCTGCAAGTGGCACTGGCATGCTAAATATCAAGTTTTGCTTGCTGTTGTGACTGATCAACATCTCATGTCGTTTCAGTTGGCGAAACAAAAGCTCATGTGTGTTCTTGACACTTCCTA
>59815_A
ATGGCCTCTTGAACGTGCATTGCGCTCTTGGGATATGCCTGAGAGCATGTCTGCTTCAGTGCTTCTACTTTCATTTTCTGCTGCTCTTGTTTTCAGGAGCAGTGTTGCTGCATGCTTCTGCAAGTGGCACTGGCATGCTAAATATCAAGTTTTGCTTGCTGTTGTGACTGATCAACATCTCATGTCGTTTCAGTTGGCGAAACAAAAGCTCATGTGTGTTCTTAACACTTCCTA
>61370_A
ATGGCCTCTTGAATGTGCATTGCGCTCTTGGGATATGCCTGAGAGCATGTCTGCTTCAGTGCTTCTACTTTCATTTTCTGCTGCTCTTGTTATCAGGAGCAGTGTTGCTGCATGCTTCTGCAAGTGGCACTGGCATGCTAAACATCAAGTTTTGCTTGCTGTTGTGACTGATCAACATCTCATGTCGTTTCAGTTGGCGAAACAAAAGCTCATGTGTGTTCTTAACACTTCCTA
>70811_A
AATGGCCTCTTGAACGTGCATTGCGCTCTTGGGATATGCCTGAGAGCATGTCTGCCTCAGTGCTTCTACTTTCATTTTCTGCTGCTCTTGTTATCAGAAGCAGTGTTGCTGCATGCTTCTGCAAGTGGCACTGGCATGCTAAATATCAAGTTTTGCTTGCTGTTGTGACTGATCAACATCTCATGTTGTTTCAGTTGGCGAAACAAAAGCTCATGTGTGTTCTTAACACTTCCTA
>71023_A
AATGGCCTCTTGAACGTGCATTGCGCTCTTGGGATACGCCTGAGAGCATGTCTGCTTCAGTGCTTCTACTTTCATTTTCTGCTGCTCTTGTTATCAGGAGCAGTGTTGCTGCATGCTTCTGCAAGTGGCACTGGCATGCTAAATATCAAGTTTTGCTTGCTGTTGTGACTGATCAACATCTCATGTTGTTTCAGTTGGCGAAACAAAAGCTCATGTGTGTTCTTAACACTTCCTA
>2379_A
AATGGCCTCTTGAACGTGCATTGCGCTCTTGGGATATGCCTGAGAGCATGTCTGCTTCAGTGCTTCTACTTTCATTTTCTGCTGCTCTTGTTATCAGGAGCAGTGTTGCTGCATGCTTCTGCAAGTGGCACTGGCATGCTAAATATCAAATTTTGCTTGCTGTTGTGACTGATCAACATCTCATGTCGTTTCAGTTGGCGAAACAAAAGCTCATGTGTGTTCTTAACACTTCCTA
>1088_A
AATGGCCTCTTAAACGTGCATTGCGCTCTTGGGATATGCCTGAGAGCATGTCTGCTTCAGTGCTTCTACTTTCATTTTCTGCTGCTCTTGTTATCAGGAGCAGTGTTGCTGCATGCTTCTGCAAGTGGCACTGGCATGCTAAATATCAAGTTTTGCTTGCTGTTGTGACTGATCAACATCTCATGTCGTTTCAGTTGGCGAAACAAAAGCTCATGTGTGTTCTTAACACTTCCTA
>7561_A
AATGGCCTCTTGAACGTGCATTGCGCTCTTGGGATATGCCTGAGAGCATGTCTGCTTCAGTGCTTCTACTTTCATTTTCTGCTGCTCTTGTTATCAGGAGCAGTGTTGCTGCATGCTTCTGCAAGTGGCACTGGCATGCTAAATATCAAGTTTTGCTTGCTGTTGTGACTGATCAACATCTCATGTCGTTTCAGTTGGCGAAACAAAAGCGCATGTGTGTTCTTAACACTTCCTA
>1068_A
AATGGCCTCTTGAACGTGCATTGCGCTCTTGGGATATGCCTGAGAGCATGTCTGCTTCAGTGCTTCTACTTTCATTTTCTGCTGCTCTTGTTATCAGGAGCAGTGTTGCTGCATGCTTCTGCAAGTGACACTGGCATGCTAAATATCAAGTTTTGCTTGCTGTTGTGACTGATCAACATCTCATGTCGTTTCAGTTGGCGAAACAAAAGCTCATGTGTGTTCTTAACACTTCCTA
>70802_A
AATGGCCTCTTGAACGTGCATTGCGCTCTTGGGATACGCCTGAGAGCATGTCTGCTTCAGTGCTTCTACTTTCATTTTCTGCTGCTCTTGTTATCAGAAGCAGTGTTGCTGCATGCTTCTGCAAGTGGCACTGGCATGCTAAATATCAAGTTTTGCTTGCTGTTGTGACTGATCAACATCTCATGTCGTTTCAGTTGGCGAAACAAAAGCTCATGTGTGTTCTTAACACTTCCTA
>71024_A
AATGGCCGCTTGAACGTGCATTGCGCTCTTGGGATATGCCTGAGAGCATGTCTGCTTCAGTGCTTCTACTTTCATTTTCTGCTGCTCTTGTTATCAGGAGCAGTGTTGCTGCATGCTTCTGCAAGTGGCACTGGCATGCTAAATATCAAGTTTTGCTTGCTGTTGTGACTGATCAACATCTCATGTTGTTCCAGTTGGCGAAACAAAAGCTCATGTGTGTTCTTAACACTTCCTA
>70800_A
AATGGCCGCTTGAACGTGCATTGCGCTCTTGGGATATGCCTGAGAGCATGTCTGCTTCAGTGCTTCTACTTTCATTTTCTGCTGCTCTTGTTATCAGAAGCAGTGTTGCTGCATGCTTCTGCAAGTGGCACTGGCATGCTAAATATCAAGTTTTGCTTGCTGTTGTGACTGATCAACATCTCATGTCGTTTCAGTTGGCGAAACAAAAGCTCATGTGTGTTCTTAACACTTCCTA
>10920_A
AATGGCCTCTTGAACGTGCATTGCGCTCTTGGGATATGGCCTGAGAGCATGTCTGCTTCAGTGCTTCTACTTTCATTTTCTGCTGCTCTTGTTATCAGGAGCAGTGTTGCTGCATGCTTCTGCAAGTGGCACTGGCATGCTAAATATCAAGTTTTGCTTGCTGTTGTGACTGATCAACATCTCATGTCGTTTCAGTTGGCGAAACAAAAGCTCATGTTTGTTCTTAACACTTCCTA
>71025_A
AATGGCCTCTTGAACGTGCATTGCGCTCTTGGGATATGCCTGAGAGCATGTCTGCCTCAGTGCTTCTACTTTCATTTTCTGCTGCTCTTGTTATCAGAAGCAGTGTTGCTGCATGCTTCTGCAAGTGGCACTGGCATGCTAAATATCAAGTTTTGCTTGCTGTTGTGACTGATCAACATCTCATGTCGTTTCAGTTGGCGAAACAAAAGCTCATGTGTGTTCTTAACACTTCCTA
>959_A
AATGGCCTCTTGAACGTGCATTGCGCTCTTGGGATATGCCTGAGAGCATGTCTGCTTCAGTGCTTCTACTTTCATTTTCTGCTGCTCTTGTTATCAGGAGCAGTGTTGCTGCATGCTTCTGCAAGTGGCACTGGCATGCTAAATATCAAGTTTTGCTTGCTGTTGTGACTGATCATCATCTCATGTCGTTTCAGTTGGCGAAACAAAAGCTCATGTGTGTTCTTAACACTTCCTA
>54512_A
AATGGCCTCTTGAACGTGCGTTGCGCTCTTGGGATATGCCTGAGAGCATGTCTGCTTCAGTGCTTCTACTTTAATTTTCTGCTGCTCTTGTTATCAGGAGCAGTGTTGCTGCATGCTTCTGCAAGTGGCACTGGCATGCTAAATATCAAGTTTTGCTTGCTGTTGTGACTGATCAACATCTCATGTCGTTTCAGTTGGCGAAACAAAAGCTCATGTGTGTTCTTAACACTTCCTA
>70799_A
AATGGCCGCTTGAACGTGCATTGCGCTCTTGGGATATGCCTGAGAGCATGTCTGCTTCAGTGCTTCTACTTTCATTTTCTGCTGCTCTTGTTATCAGGAGCAGTGTTGCTGCATGCTTCTGCAAGTGGCACTGGCATGCTAAATATCAAGTTTTGCTTGCTGTTGTGACTGATCAACATCTCATGTTGTTTCAGTTGGCGAAACAAAAGCTCATGTGTGTTCTTAACACTTCCTA
>71027_A
AATGGCCGCTTGAACGTGCATTGCGCTCTTGGGATATGCCTGAGAGCATGTCTGCTTCAGTGCTTCTACTTTCATTTTCTGCTGCTCTTGTTATCAGAAGCAGTGTTGCTGCATGCTTCTGCAAGTGGCACTGGCATGCTAAATATCAAGTTTTGCTTGCTGTTGTGACTGATCAACATCTCATGTTGTTCCAGTTGGCGAAACAAAAGCTCATGTGTGTTCTTAACACTTCCTA
>70816_A
AATGGCCTCTTGAATGTGCATTGCGCTCTTGGGATATGCCTGAGAGCATGTCTGCTTCAGTGCTTCTACTTTCATTTTCTGCTGCTCTTGTTATCAGGAGCAGTGTTGCTGCATGCTTCTGCAAGTGGCACTGGCATGCTAAATATCAAGTTTTGCTTGCTGTTGTGACTGATCATCATCTCATGTCGTTTCAGTTGGCGAAACAAAAGCTCATGTGTGTTCTTAACACTTCCTA
>71026_A
AATGGCCTCTTGAACGTGCATTGCGCTCTTGGGATATGCCTGAGAGCATGTCTGCTTCAGTGCTTCTACTTTCATTTTCTGCTGCTCTTGTTATCAGAAGCAGTGTTGCTGCATGCTTCTGCAAGTGGCACTGGCATGCTAAATATCAAGTTTTGCTTGCTGTTGTGACTGATCAACATCTCATATCGTTTCAGTTGGCGAAACAAGAGCTCATGTGTGTTCTTAACACTTCCTA
>C15
AATGGCCTCCTGAACGTGCGTTGCACCCTTGGGATTTCCTGAGAGTATGTCTGCTTCAGTGCTTAACTTGCCCCAACTTTGCAAGCAGGATGTGTTTCTGCCTTGCGTTCTTATGAGCTATTGCCTTCTGCGCCAATGGCTTGTTAATTGCTTGGTTCTTGCAAAATGCTTTGCGCGCTGTTATTCAAGTTTCTACCTTCGCGGTTTTACTTGAGTGACGCTGCTCATGCTTGCAACCGCTGGGATGCAGGTGCATGCCTCTA
>C15r
AATGGCCTCCTGAACGTGCGTTGCACCCTTGGGATTTCCTGAGAGTATGTCTGCTTCAGTGCTTAACTTGCCCCAACTTTGCAAGCAGGATGTGTTTCTGCCTTGCGTTCTTATGAGCTATTGCCTTCTGCGCCAATGGCTTGTTAATTGCTTGGTTCTTGCAAAATGCTTTGCGCGCTGTTATTCAAGTTTCTACCTTCGCGGTTTTACTTGAGTGACGCTGCTCATGCTTGCAACCGCTGGGATGCAGGTGCATGCCTCCA
>C1
AATGGCCTCCTGAACGTGCGTTGCACTCTTGGGATTTCCTGAGAGTATGTCTGCTTCAGTGCTTAACTTGCCCCAACTTTGCAAGCAGGATGTGTTTCTGCCTTGCGTTCTTATGAGCTATTGCCCTCTGAGCCAATGGCTTGTTAATTGCTTGGTTCTTGCAAAATGCTTTGCGCGCTGTTATTCAGGTTTCTACCTTCGTGGTTTTACTTGAGTGACGCTGCTCATGCTTGCAACCGCTGGGATGCAGGTGCATGCCTCTA
>32423_C
AATGGCCTCCTGAACGTGCGTTGCACTCTTGGGATTTCCTGAGAGTATGTCTGCTTCAGTGCTTAACTTGCCCCAACTTTGCAAGTAGGATGTGTTTCTGCCTTGTGTTCTTATGAGCTATTGCCCTCTGAGCCAATGGCTTGTTAATTGCTTGGTTCTTGCAAAACGTTTTGCGCGCTGTTATTCAGGTTTCTACCTTCGTGGTTTTACTTGAGTGACGCTGCTCATGCTTGCAACCGCTGGGATGCAGCTGCATGCCTCTA
>C91e
AATGGCCTCCTGAACGTGCGTTGCACTCTTGGGATTTCCTGAGAGTATGTCTGCGTCAGTGCTTAACTTGCCCCAACTTTGCAAGCAGGATGTGTTTCTGCCTTGCGTTCTTATGAGCTATTGCCCTCTGCGCCAATGGCTTGTTAATTGCTTGGTTCTTGCAAAATGCTTTGCGCGCTGTTATTCAAGTTTCTACCTTCAAGTAGTTTTACTTGAGTGACGTTGCTCATGCTTGCGACCGCTGGGATGCAGGTGCATGCCTCTA
>C15h
AATGGCCTCCTGAACGTGCGTTGCACCCTTGGGATTTCCTGAGAGTATGTCTGCTTCAGTGCTTAACTTGCTCCAACTTTGCAAGCAGGATGTGTTTCTGCCTTGCGTTCTTATGAGCTATTGCCTTCTGCGCCAATGGCTTGTTAATTGCTTGGTTCTTGCAAAATGCTTTGCGCGCTGTTATTCAAGTTTCTACCTTCGCGGTTTTACTTGAGTGACGCTGCTCATGCTTGCAACCGCTGGGATGCAGGTGCATGCCTCTA
>D1
AATGGCCCCCTGAACGCGCATTGCACTCTTGGGACTTCCTGAGAGTATGTTTGCTTCAGTGCTTATTTTACCTCCTTGCAAGGTTCTGTCGCAACCTTGTGCCCTGGCCAGCCATGGGTTAACTTGCCCATGGCTTGCTGAGTAGTGATCTTTTAGAGCAAGCTCTGGCACGCTGTTGTTTGAGGCAGCCTATATTGAGGCTATTTCAAATGACGTTGCTACAAGCTTGATGTGTCCTTCTGCGCCGTTGCGCATCCCATA
>D3a
AATGGCCCCCTGAACGCGCATTGCACTCTTGGGACTTCCTGAGAGTATGTTTGCTTCAGTGCTTATTTTACCTCTTTGCAAGGTTCTGTCGCAACCTTGTGCCCTGGCCAGCCATGGGTTAACTTGCCCATGGCTTGCTTGAGTAGTGATCTTTTAGAGCAAGCTCTGGCACGCTGTTGTTTGAGGCAGCCTATATTGAGGCTATTTCAAATGACGTTGCTACAAGCTTGATGTGTCCTTCTGCGCCGTTGCGCATCCCATA
>D4
AATGGCCCCCTGAACGCGCATTGCACTCTTGGGACTTCCTGAGAGTATGTTTGCTTCAGTGCTTATTTTACCTCCTTGCAAGGTTCTGTCGCAACCTTGTGCCCTGGCCAGCCACGGGTTAACTTGCCCATGGCTTGCTGAGTAGTGATCTTTTAGAGCAAGCTCTGGCACGCTGTTGTTTGAGGCAGCCTATATTGAGGCTATTTCAAATGACGTTGCTACAAGCTTGATGTGTCCTTCTGCGCCGTTGCGCATCCCATA
>D3
AATGGCCCCCTGAACGCGCATTGCACTCTTGGGACTTCCTGAGAGTATGTTTGCTTCAGTGCTTATTTTACCTCTTTGCAAGGTTCTGTCGCAACCTTGTGCCCTGGCCAGCCATGGGTTAACTTGCCCATGGCTTGCTGAGTAGTGATCTTTTAGAGCAAGCTCTGGCACGCTGTTGTTTGAGGCAGCCTATATTGAGGCTATTTCAAATGACGTTGCTACAAGCTTGATGTGTCCTTCTGCGCCGTTGCGCATCCCATA
>D4c
AATGGCCCCCTGAACGCGCATTGCACTCTTGGGACTTCCTGAGAGTATGTTTGCTTCAGTGCTTATTTTACCTCCTTGCAAGGTTCTGTCGCAACCTTGTGCCCTGGCCAGCCACGGGTTAACTTGCCCATGGCTTGCTGAGTAGTGATCTTTTAGAGCAAGCTCTGGCACGCTGTTGTTTGAGGCAGCCTATATTGAGGCTATTTCAAATGACGTTGCTACAAGCTTGATGTGTCCTTCTGCGCTGTTGCGCATCCCATA
