# Supplementary material for: Contrasting heat stress response patterns of coral holobionts across the Red Sea suggest distinct mechanisms of thermal tolerance
Source: Research Square preprint supplement (doi:10.21203/rs.3.rs-117181/v1), 2020-12-18
Supplement: Supplementary file 2 [file DataS4_16S.xlsx]

## Sheet: stats_mothur
ID	total pair-ended obtained	contigs formed	after removing sequences < 200 bp	after removing singletons	after alignment	Pre-clustering	after removing chimeras	after removing non-bacterial reads
ICN1-30	106403	98665	98592	45364	45339	45339	45205	45205			Total number of OTUs	2400
ICN1-33	103279	95654	95401	31757	31681	31681	31559	31537			contaminants removed	136
ICN1-36	95940	88915	87894	27442	27442	27442	26044	26030			Number of OTUs used for the analysis	2264
ICN2-30	88559	82176	82131	36450	36444	36444	36251	36243
ICN2-33	93539	86727	86575	40817	40808	40808	40658	40620			Top 10 contaminants removed
ICN2-36	94662	87866	87659	37779	37777	37777	37025	37009			Rhodobacteraceae
ICN3-30	129442	119901	119842	40541	40479	40479	40395	40364			Erythrobacteraceae
ICN3-33	162724	151591	150323	67947	67912	67912	67745	67720			Flavobacteriaceae
ICN3-36	80883	75121	75047	26195	26195	26195	24097	24097			Xanthomonadaceae
ICN4-30	82539	76751	76710	21240	21238	21238	20781	20680			Caulobacteraceae
ICN4-33	128030	118993	117061	39891	39846	39846	39727	39549			Alteromonadaceae
ICN4-36	77733	72671	72598	25784	25784	25784	21850	21848			Moraxellaceae
ICN5-30	151217	140065	139534	42029	42023	42023	41963	41862			A
ICN5-33	95500	88426	87973	25142	25125	25125	25110	24992			Actinomycetales_unclassified
ICN5-36	61979	57762	57725	21006	20987	20987	17245	17243			Comamonadaceae
ICN6-30	113938	105808	105737	32226	32216	32216	31899	31876
ICN6-33	106855	99039	98224	43594	43536	43536	43444	43411
ICN6-36	70541	65925	65438	23982	23981	23981	21053	21053
ICN7-30	124700	115484	115417	52248	52212	52212	52147	52140
ICN7-33	94390	87531	86882	41238	41222	41222	41158	41157
ICN7-36	84406	78899	77891	29685	29684	29684	27266	27265
AF1-30	112700	105540	105276	43852	43852	43852	36035	36026
AF1-33	77898	72543	72480	25005	25005	25005	20638	20637
AF1-36	80438	74777	74735	28552	28552	28552	25042	25037
AF2-30	68431	64089	64052	18068	18068	18068	13511	13509
AF2-33	57503	53576	53520	20289	20289	20289	17244	17230
AF2-36	61922	57652	57597	24097	24097	24097	19745	19740
AF3-30	63690	59712	59661	16372	16372	16372	12378	12376
AF3-33	67915	63296	63270	20452	20452	20452	16461	16460
AF3-36	47098	43935	43909	11937	11937	11937	8912	8911
AF4-30	73304	68148	68101	28793	28793	28793	24768	24762
AF4-33	56997	53345	53305	15278	15278	15278	12710	12652
AF4-36	80675	75154	75013	27078	27077	27077	23909	23905
AF5-30	47584	44325	44311	17749	17749	17749	14642	14637
AF5-33	81452	76487	75500	21031	21031	21031	16313	16312
AF5-36	53247	49796	49777	16624	16624	16624	13112	13112
AF6-30	68857	64326	64289	17433	17433	17433	13428	13428
AF6-33	101203	94936	94739	36364	36364	36364	29088	29082
AF6-36	59777	55789	55726	12823	12823	12823	10039	10039
AF7-30	96236	89585	89544	37341	37341	37341	32380	32374
AF7-33	69115	64564	64531	21977	21977	21977	17146	17146
AF7-36	71581	66825	66777	21812	21812	21812	16745	16745
ExT1-30	93288	86435	86350	37288	37284	37284	35916	35916
ExT1-33	62209	57743	57713	21693	21693	21693	20226	20223
ExT1-36	64274	59925	59815	17176	17173	17173	15868	15867
PrT1-30	52502	48667	48650	23220	23219	23219	22035	22035
PrT1-33	72302	67140	67051	24311	23854	23854	22271	22254
PrT1-36	68662	63752	63705	19829	19829	19829	17753	17748
ExT2-30	53101	49332	49296	21284	21284	21284	19069	19065
ExT2-33	77597	71968	71920	22404	22403	22403	20529	20529
ExT2-36	123708	115566	115258	46179	46178	46178	41249	41230
PrT2-30	86348	80067	79268	28112	28111	28111	25678	25672
PrT2-33	84419	78107	78073	29660	29658	29658	28950	28944
PrT2-36	65056	60315	60273	24967	24967	24967	22836	22836
ExT3-30	103974	96681	96558	45820	45818	45818	44358	44345
ExT3-33	91624	84611	84592	37250	37248	37248	35970	35957
ExT3-36	76880	71378	71322	27742	27741	27741	25666	25607
PrT3-30	125547	116239	116137	51073	51068	51068	49219	49213
PrT3-33	72868	67644	67593	30379	30369	30369	27694	27686
PrT3-36	74901	69676	69626	26110	26109	26109	23514	23496
ExT4-30	100834	94027	93864	35582	35566	35566	33178	33156
ExT4-33	96747	89583	89485	28150	28143	28143	26618	26618
ExT4-36	83969	77898	77843	24497	24496	24496	23136	23127
PrT4-30	68261	63218	63193	27972	27972	27972	25467	25460
PrT4-33	57746	53613	53598	21906	21906	21906	20757	20756
PrT4-36	72295	67331	67273	24125	24125	24125	21973	21969
ExT5-30	64953	60389	60348	23135	23135	23135	20426	20423
ExT5-33	56728	52637	52619	18474	18474	18474	15907	15906
ExT5-36	69784	64786	64761	26580	26578	26578	24806	24797
PrT5-30	67768	62983	62936	21261	21261	21261	19884	19872
PrT5-33	66491	61723	61675	20062	20062	20062	18174	18171
PrT5-36	99077	92629	91970	38062	38060	38060	34072	34031
ExT6-30	69201	64140	64117	22869	22869	22869	21143	21136
ExT6-33	44352	41336	41332	14358	14358	14358	11569	11569
ExT6-36	57669	53397	53383	20356	20356	20356	17629	17627
PrT6-30	80992	75349	75273	33051	33050	33050	30951	30946
PrT6-33	65263	60476	60453	26569	26569	26569	24605	24604
PrT6-36	103324	96153	96070	37435	37434	37434	34948	34926
ExT7-30	73417	67909	67879	27766	27766	27766	25661	25450
ExT7-33	72234	67006	66922	24552	24549	24549	22493	22439
ExT7-36	71230	66009	65954	19312	19310	19310	18017	17964
PrT7-30	91067	85008	84473	30088	30088	30088	27261	27254
PrT7-33	75633	70250	70199	22122	22122	22122	18648	18643
PrT7-36	79461	73781	73738	26276	26276	26276	24293	24289
neg-PCR	5954	5351	3924	728	728	728	728	728
neg-kit	18603	17059	16639	2430	2430	2430	2394	2394
neg-seawater	87595	80280	79687	23351	23351	23351	23323	23283
	6994790	6501937	6483575	2410850	2409897	2409897	2213730	2212182

## Sheet: OTU_table
Group	ICN1-30	ICN1-33	ICN1-36	ICN2-30	ICN2-33	ICN2-36	ICN3-30	ICN3-33	ICN3-36	ICN4-30	ICN4-33	ICN4-36	ICN5-30	ICN5-33	ICN5-36	ICN6-30	ICN6-33	ICN6-36	ICN7-30	ICN7-33	ICN7-36	AF1-30	AF1-33	AF1-36	AF2-30	AF2-33	AF2-36	AF3-30	AF3-33	AF3-36	AF4-30	AF4-33	AF4-36	AF5-30	AF5-33	AF5-36	AF6-30	AF6-33	AF6-36	AF7-30	AF7-33	AF7-36	ExT1-30	ExT1-33	ExT1-36	PrT1-30	PrT1-33	PrT1-36	ExT2-30
Otu0001	42890	17737	33	32804	37485	53	32226	62044	32	4482	23813	36	24634	19510	24	4117	39448	19	48749	39735	16	2258	1129	3762	59	1090	982	1124	3057	62	2681	737	1828	2406	422	158	399	2160	149	4375	630	141	143	72	13	15791	3802	8905	3
Otu0002	114	64	13410	5	68	20654	75	80	15942	146	519	11303	495	27	8509	875	15	15464	19	87	13545	13766	10061	3448	5453	3253	6221	4324	5521	3770	5608	3209	3503	5845	7964	6235	6616	14343	4832	13275	8372	7820	987	2104	2555	104	1203	553	9855
Otu0003	21	172	57	12	144	73	52	231	90	68	474	77	0	0	66	4	89	30	54	56	145	2768	915	1981	356	1580	1307	418	483	135	2166	675	2353	641	352	333	345	888	149	1778	349	326	7924	5557	2152	1446	3734	1514	2334
Otu0004	1	125	84	5	81	45	2	331	49	115	561	66	241	110	89	1	147	49	0	19	175	6761	2417	5745	1793	4951	3293	972	1781	503	5422	1999	6309	1569	1030	1035	1270	2456	636	4339	917	1078	6815	3275	1553	1050	2141	1179	1053
Otu0005	0	0	0	0	0	0	0	0	0	0	0	2	0	0	0	0	0	1	0	0	2	1686	755	2473	253	916	1398	591	198	168	1288	358	2001	452	205	206	230	736	166	566	291	1115	2487	633	881	102	2102	211	246
Otu0006	0	0	0	112	14	0	0	0	4	0	0	0	0	0	0	0	9	0	1	0	0	0	0	0	0	0	0	0	0	0	0	0	0	0	0	0	0	0	0	0	0	0	0	5	5	115	13	221	4
Otu0007	0	0	546	790	16	564	0	0	249	606	0	237	0	0	75	1122	0	107	1	0	294	305	286	510	229	225	478	134	1450	109	248	1157	268	160	362	119	309	238	161	544	243	274	1733	606	876	300	719	300	233
Otu0008	0	39	6904	0	52	8192	13	89	2183	9	26	5003	1	30	3681	89	86	1146	14	78	4057	398	301	868	86	320	691	92	92	66	405	141	737	136	48	158	116	291	76	206	161	451	712	164	235	72	157	97	151
Otu0009	0	54	180	19	11	235	23	0	0	0	125	88	1	0	0	128	24	0	26	8	78	621	132	1089	117	212	434	81	112	59	409	285	607	169	85	56	34	395	136	362	118	169	2639	560	784	411	1110	397	198
Otu0010	0	0	0	1	0	0	0	0	5	0	82	4	0	0	2	0	0	0	0	11	3	746	237	575	137	592	316	88	141	92	608	196	679	177	147	139	185	289	100	518	107	181	1213	842	341	215	450	206	277
Otu0011	0	0	178	0	9	602	0	0	516	0	0	279	0	10	478	0	0	649	0	0	835	535	49	182	189	512	609	120	194	103	950	231	300	472	187	115	203	232	175	846	314	69	222	838	1616	26	243	185	331
Otu0012	9	134	498	54	608	165	155	625	1563	31	3588	1766	167	116	1356	5	191	386	0	87	2087	42	269	60	44	14	16	8	11	25	8	79	26	133	272	183	278	525	77	77	70	72	151	530	277	158	639	95	877
Otu0013	0	0	0	3	11	0	76	18	0	40	96	0	136	58	1	0	46	0	92	0	0	42	26	120	9	122	20	70	128	6	191	129	255	107	49	11	1	14	0	24	26	0	1026	223	190	328	655	156	8
Otu0014	0	0	0	0	0	0	0	0	0	384	0	0	0	0	1	0	6	0	0	0	0	119	54	194	52	65	77	19	41	3	101	49	135	31	12	22	13	43	13	109	7	15	454	169	226	104	252	55	68
Otu0015	457	3166	254	654	356	635	1809	1143	72	497	1791	31	5231	1760	19	641	773	29	1161	285	124	0	0	0	0	0	0	0	0	0	0	0	0	0	0	0	0	0	0	0	0	0	0	0	0	0	0	0	0
Otu0016	0	0	15	0	0	0	0	0	3	0	0	8	0	0	0	0	0	0	0	0	0	1284	802	528	458	419	613	801	377	372	392	182	415	406	129	460	713	889	307	639	838	720	998	265	184	98	455	96	94
Otu0017	0	0	4	21	0	0	0	0	0	268	0	1	0	0	1	53	0	0	0	0	0	223	142	301	50	119	206	53	55	30	117	69	179	50	22	46	44	150	46	145	93	92	1750	498	370	186	834	192	136
Otu0018	72	0	55	0	18	38	0	0	21	0	89	30	0	0	36	0	0	18	0	0	67	162	56	158	21	149	154	26	52	19	221	93	217	36	22	11	16	51	10	78	52	26	344	227	88	80	280	21	110
Otu0019	1	0	515	0	0	376	0	0	279	29	0	420	0	0	178	0	0	470	0	15	433	413	321	501	66	266	500	72	116	39	323	148	455	83	65	155	84	282	77	360	165	328	594	134	82	84	150	0	121
Otu0020	0	0	0	0	0	0	0	0	0	0	0	0	0	0	0	0	0	0	0	0	0	266	315	299	352	296	163	58	59	776	292	119	1220	84	25	1032	168	92	67	258	139	1575	17	81	20	10	16	7	48
Otu0021	1	0	0	0	0	0	0	0	0	0	0	0	0	0	0	11108	16	0	0	0	0	0	0	0	0	0	0	0	0	0	0	0	0	0	0	0	0	0	0	0	0	0	0	0	0	0	0	0	0
Otu0022	0	0	0	0	0	0	0	8	0	0	0	0	0	0	0	0	0	0	0	0	0	56	36	15	12	68	50	19	16	14	66	8	130	22	2	15	18	0	12	86	11	18	937	405	172	68	22	61	184
Otu0023	23	0	172	0	0	173	0	0	146	0	0	91	0	0	191	0	0	124	0	0	398	0	155	49	275	0	0	191	127	97	0	0	83	235	93	111	266	181	137	0	267	268	0	0	292	50	0	52	1298
Otu0024	47	234	199	39	126	173	21	143	182	8	2195	210	0	350	124	0	239	70	30	14	157	0	0	0	0	0	0	0	0	1	3	1	0	2	0	0	0	1	0	1	0	1	21	11	65	2	16	19	9
Otu0025	0	0	5	0	5	29	0	0	1	7	0	151	0	0	10	0	0	2	0	14	18	143	165	121	191	36	116	25	148	22	16	38	26	13	211	18	98	104	71	197	774	135	375	144	169	68	222	33	166
Otu0026	0	0	10	1	0	0	0	0	0	0	0	1	0	0	1	0	0	0	0	0	4	689	52	324	38	362	614	230	125	48	919	229	300	135	8	38	46	71	11	75	74	17	53	54	105	4	55	18	63
Otu0027	0	0	647	0	0	2029	0	0	839	0	0	509	0	0	490	0	0	147	0	0	698	0	0	0	0	0	0	0	0	0	1	0	0	0	23	0	0	0	0	0	3	0	0	0	5	0	0	0	0
Otu0028	0	50	223	161	174	318	0	0	162	0	74	219	0	10	87	102	14	50	0	17	109	22	21	17	105	5	5	8	30	4	17	16	2	9	33	4	13	25	5	268	338	60	329	130	82	87	77	54	40
Otu0029	0	0	27	0	17	86	0	37	45	0	0	13	0	0	411	9	0	454	0	0	1072	309	97	140	55	169	323	28	75	29	404	182	252	128	67	32	40	64	29	66	51	11	2	28	8	0	1	0	1
Otu0030	0	0	0	0	0	0	0	0	0	0	0	0	0	0	0	0	0	0	0	0	0	22	12	20	15	11	8	2	16	0	9	5	16	4	3	10	9	20	1	36	0	4	106	69	73	35	117	9	34
Otu0031	0	0	3	0	0	11	0	0	3	0	0	0	0	0	3	4750	8	0	0	0	44	0	0	0	0	0	0	0	0	0	0	0	0	0	0	0	0	2	0	0	1	0	0	0	0	0	3	0	0
Otu0032	0	0	0	0	0	0	0	0	0	0	0	0	0	0	0	0	0	0	0	0	0	2	1	3	1	1	3	1	0	0	1	0	4	0	0	0	0	3	0	1	2	6	84	37	50	9	321	22	16
Otu0033	0	0	29	186	6	27	11	0	12	564	0	32	0	0	14	968	0	15	0	0	28	82	77	48	131	13	7	22	156	27	33	385	18	35	101	50	73	51	106	267	112	84	0	0	4	0	11	0	3
Otu0034	0	0	0	6	8	0	0	0	0	0	0	0	0	0	0	0	4	0	0	0	0	7	6	7	2	1	3	3	10	0	22	3	22	8	8	1	1	10	0	9	1	0	399	70	30	206	81	92	14
Otu0035	0	1461	0	0	0	0	2301	0	0	16	0	0	0	0	0	0	0	0	0	0	0	0	0	0	0	4	0	0	0	0	0	0	0	0	0	0	0	0	0	0	0	0	0	0	0	0	0	0	0
Otu0036	0	0	3	0	0	0	0	0	0	0	0	1	0	0	1	0	0	0	0	0	0	15	441	32	203	42	14	226	253	191	15	8	31	134	446	271	103	541	215	30	229	120	0	42	3	0	2	0	1
Otu0037	0	0	0	0	0	0	0	0	0	0	0	2	0	0	1	0	0	0	0	0	0	132	76	147	15	119	94	19	27	18	69	54	159	57	45	25	23	79	9	49	35	103	166	49	47	34	97	33	64
Otu0038	20	320	6	19	27	16	52	65	0	37	49	10	0	50	1	46	37	5	68	83	13	37	46	20	1	17	9	2	0	0	51	12	17	12	1	1	2	7	1	203	34	5	0	0	0	20	65	1	16
Otu0039	1	15	15	0	16	19	0	5	4	0	30	4	2	0	3	1	5	0	0	12	23	102	27	70	28	74	48	35	22	8	154	28	91	18	6	17	36	40	2	60	30	10	48	52	27	11	69	21	56
Otu0040	0	0	0	0	0	0	0	0	0	1297	1889	0	0	0	1	0	0	0	0	0	0	0	0	0	0	0	0	0	0	0	0	0	0	0	0	0	0	0	0	0	0	0	0	0	0	0	0	315	0
Otu0041	0	0	1	4	0	0	0	0	0	3273	0	1	78	0	0	0	21	0	0	0	1	1	0	0	1	0	0	0	3	0	0	2	0	0	3	1	0	7	1	26	0	0	0	0	0	0	0	0	0
Otu0042	0	0	23	0	0	0	0	0	2	0	8	25	0	0	5	0	0	764	0	0	55	0	1	0	364	1	0	7	0	28	1	0	0	4	114	0	0	1713	0	0	0	0	0	0	0	0	0	0	0
Otu0043	360	667	2	0	50	14	775	97	1	96	31	1	409	66	0	149	109	0	104	12	20	0	0	0	0	1	0	0	0	0	0	0	0	0	0	0	0	0	0	0	0	0	0	0	0	5	1	1	0
Otu0044	0	0	0	0	0	0	0	0	0	0	0	0	0	0	0	4	0	0	0	0	0	0	0	0	0	0	0	0	0	0	0	0	0	0	0	0	0	0	0	0	0	0	0	0	0	0	0	0	0
Otu0045	51	0	18	5	16	2	11	0	19	4	18	18	0	0	23	14	0	11	7	2	29	113	23	4	60	21	10	48	14	11	25	15	16	23	12	6	68	81	25	136	250	32	49	55	10	12	19	0	38
Otu0046	0	0	0	0	0	0	0	0	0	0	0	0	0	0	0	0	0	0	0	0	0	41	4	144	8	21	114	4	3	10	31	4	38	5	4	7	4	11	7	46	3	29	95	27	35	4	69	6	14
Otu0047	14	108	5	16	40	62	81	114	5	19	167	1	470	266	2	23	58	1	126	31	3	8	4	6	0	9	3	2	2	0	3	2	4	2	0	0	0	3	0	5	0	0	25	14	2	12	14	0	1
Otu0048	0	0	0	0	0	0	0	0	0	0	0	0	0	0	0	0	10	0	0	0	0	225	42	90	28	127	93	45	49	12	287	64	184	75	18	30	24	76	7	277	37	10	10	4	9	8	9	9	16
Otu0049	0	0	5	0	0	62	0	0	97	0	1	28	0	0	186	0	0	87	0	0	201	17	0	0	499	2	0	18	76	13	15	1	5	48	40	45	1	0	267	0	1	29	0	0	0	0	0	0	3
Otu0050	0	0	0	0	0	0	0	0	0	0	0	0	0	0	0	0	0	0	0	0	0	53	16	37	8	45	37	8	11	4	33	10	37	11	4	10	15	14	0	0	10	8	158	61	64	44	65	10	15
Otu0051	0	0	527	0	0	486	0	0	245	0	6	146	0	0	62	0	0	88	0	0	271	6	0	0	0	0	3	1	0	3	3	1	7	4	2	3	0	0	3	6	2	4	27	9	35	1	16	2	0
Otu0052	0	0	43	0	0	82	0	0	71	0	0	42	27	0	140	0	0	72	0	0	301	14	4	1	40	4	4	290	29	21	35	0	5	3	136	134	383	10	55	1	9	2	0	204	36	0	0	0	0
Otu0053	0	0	0	0	0	0	0	0	0	0	0	0	0	0	0	0	0	0	0	0	0	4	0	0	0	0	0	0	0	0	3	0	0	0	0	0	0	0	0	0	0	0	50	1	16	0	12	6	5
Otu0054	0	90	0	0	0	0	0	0	0	0	0	0	0	0	0	0	0	0	0	0	0	0	0	0	0	0	0	0	0	0	0	0	0	0	0	0	0	0	0	0	0	0	0	0	0	0	5	2175	0
Otu0055	0	0	0	0	0	0	0	0	0	0	0	0	0	0	0	2183	0	0	0	0	0	0	0	0	4	1	0	0	2	0	0	0	0	0	2	0	0	45	3	0	0	1	0	0	0	4	0	0	0
Otu0056	0	0	0	0	0	0	0	0	0	0	0	0	0	0	0	1	0	0	0	0	0	0	0	0	0	0	0	0	0	0	0	0	0	0	0	0	0	0	0	0	0	0	0	0	0	88	161	0	0
Otu0057	0	0	0	0	0	0	0	0	0	0	0	0	0	0	0	0	0	0	0	0	0	21	30	32	10	7	13	1	14	1	5	13	20	10	21	9	2	7	5	12	4	8	274	49	40	29	101	32	11
Otu0058	0	0	0	0	0	0	0	0	0	0	0	0	0	0	0	0	0	0	0	0	0	24	3	0	0	125	7	246	0	503	16	0	46	3	916	151	0	33	98	0	10	0	0	0	0	0	0	0	0
Otu0059	11	1516	2	17	0	4	39	97	0	13	3	0	26	14	0	29	14	0	41	0	3	0	2	0	0	0	0	0	0	0	0	1	0	0	0	0	0	0	0	0	0	0	0	0	2	0	4	0	1
Otu0060	0	0	0	0	0	0	0	0	0	0	0	0	0	0	0	0	0	0	0	0	0	0	0	0	0	0	0	0	0	0	0	0	0	0	0	0	0	0	0	0	0	0	0	0	0	0	0	0	0
Otu0061	0	0	48	0	0	246	0	0	241	0	0	86	0	0	46	0	0	121	0	0	256	5	0	2	119	12	3	64	25	90	6	6	10	14	5	52	19	187	92	3	4	5	0	0	0	0	0	2	0
Otu0062	0	0	0	0	0	0	0	0	0	0	0	4	0	0	0	0	0	0	0	0	3	155	58	72	27	97	110	45	17	12	102	41	117	25	20	41	37	82	7	34	25	56	39	0	4	1	26	2	12
Otu0063	22	165	12	69	64	50	212	67	7	76	146	12	616	137	0	54	117	2	91	55	2	0	0	0	0	0	0	0	0	0	0	0	2	0	0	0	0	0	0	0	0	0	0	0	0	0	0	0	0
Otu0064	88	358	24	51	37	23	163	126	9	69	85	2	400	226	0	45	32	7	108	24	8	0	0	0	0	0	0	0	0	0	0	0	0	0	0	0	0	0	0	0	0	0	0	0	0	0	0	0	0
Otu0065	0	0	0	0	0	0	0	0	0	0	0	0	0	0	0	0	0	0	0	0	0	5	1	1	2	6	2	0	1	1	14	1	0	2	1	1	1	0	0	4	1	0	22	4	5	3	35	5	14
Otu0066	0	0	0	0	0	0	0	0	0	0	0	0	0	0	0	0	0	0	0	0	0	3	1	6	0	1	1	0	0	0	0	0	2	0	0	2	1	0	2	0	4	2	61	20	55	1	29	2	7
Otu0067	0	0	103	4	116	47	0	0	124	17	139	197	0	94	164	6	82	39	0	13	136	42	9	4	2	2	0	0	0	3	4	108	0	1	18	25	47	6	36	21	3	0	0	0	0	0	7	0	10
Otu0068	0	13	0	0	0	2	0	0	0	1728	0	0	17	0	0	0	0	0	4	0	0	0	0	0	0	0	0	0	0	0	0	0	0	0	0	0	0	0	0	0	0	0	0	0	0	0	0	0	0
Otu0069	32	144	11	53	31	66	96	124	5	44	154	2	449	152	2	47	76	3	95	28	10	0	0	0	0	0	0	0	0	0	0	0	0	0	0	0	0	0	0	0	0	0	0	0	0	0	0	0	0
Otu0070	0	0	0	0	0	0	0	0	0	4	0	0	1421	127	0	48	0	0	8	0	0	0	0	0	1	0	0	0	0	0	0	0	0	0	0	0	0	0	0	2	0	0	0	0	0	0	0	0	0
Otu0071	0	0	34	0	0	12	0	0	106	0	0	15	0	0	16	0	0	59	0	0	40	21	4	30	11	25	65	1	1	3	88	29	53	34	12	7	5	12	4	17	5	4	30	4	32	0	6	8	16
Otu0072	9	80	5	11	6	24	12	64	3	7	35	0	262	126	0	14	22	0	55	18	3	0	1	0	0	0	0	0	0	0	1	0	1	0	1	0	0	0	0	3	0	0	11	0	1	6	5	6	0
Otu0073	0	0	0	0	0	0	0	0	0	0	0	3	0	0	0	0	0	1	0	0	3	9	8	1	26	14	2	14	19	8	14	2	17	5	11	3	9	3	1	17	60	20	0	16	18	1	37	4	119
Otu0074	0	0	0	0	0	0	0	0	0	0	0	0	0	0	0	0	0	0	0	0	0	21	10	2	11	3	4	2	18	0	6	26	6	0	10	4	1	10	4	16	2	2	211	54	37	20	51	14	11
Otu0075	0	0	0	0	0	0	0	0	1	0	0	1	0	0	0	0	0	1	0	0	140	0	0	0	0	1	0	0	0	0	0	2	0	0	0	0	0	0	11	0	0	0	0	0	1237	0	0	0	0
Otu0076	45	116	11	37	36	30	126	105	5	24	168	4	431	66	0	47	41	0	46	54	9	0	0	0	0	0	0	0	0	0	0	0	0	0	0	0	0	0	0	0	0	0	0	0	0	0	0	0	0
Otu0077	0	0	0	0	0	0	0	0	0	0	0	0	0	0	0	0	0	0	0	0	0	7	3	6	0	7	1	2	2	0	2	1	5	1	0	0	0	3	0	11	6	1	35	1	9	28	21	6	28
Otu0078	51	142	39	65	23	43	76	115	1	45	103	6	269	105	0	33	130	0	124	8	8	0	0	0	0	0	0	0	0	0	0	0	0	0	0	0	0	0	0	0	0	0	0	0	0	0	0	0	0
Otu0079	0	55	0	0	0	0	0	0	0	820	0	0	0	0	0	380	0	0	0	0	0	0	6	7	13	1	0	0	6	0	0	2	1	0	2	0	1	20	3	12	1	0	0	0	1	0	0	0	0
Otu0080	3	0	0	0	0	0	0	0	0	0	0	0	0	0	0	0	0	0	0	0	0	80	13	46	17	131	96	13	7	3	223	27	96	38	4	10	4	0	0	20	23	0	0	8	1	3	14	4	0
Otu0081	0	0	0	0	0	0	0	0	0	0	0	0	0	0	0	0	0	0	0	0	0	12	4	0	137	27	4	578	201	170	6	0	7	0	66	102	0	4	8	4	0	0	0	0	0	0	0	0	0
Otu0082	0	0	0	0	0	0	0	0	0	6	0	4	0	0	1	1129	0	0	0	0	0	9	6	10	1	0	3	0	1	1	0	3	0	0	2	0	2	2	1	0	0	4	31	0	2	0	0	3	1
Otu0083	13	456	4	20	6	21	27	7	0	54	55	2	328	0	2	1	9	0	41	0	0	2	3	2	0	2	9	0	1	0	13	1	2	0	0	0	0	3	0	0	0	0	0	1	1	2	2	1	1
Otu0084	0	0	0	0	0	0	0	0	0	0	0	0	0	0	0	0	0	0	0	0	0	27	14	23	1	19	9	4	11	0	25	4	8	5	4	1	2	5	3	77	3	2	87	24	21	13	40	4	11
Otu0085	0	0	0	0	0	0	0	0	0	0	0	0	0	0	0	0	0	0	0	0	0	0	0	0	0	0	0	0	0	0	0	0	0	0	0	0	0	0	0	0	0	0	0	0	0	0	0	0	0
Otu0086	0	0	0	0	0	0	0	0	0	0	0	0	0	0	0	0	0	0	0	0	0	0	6	10	4	3	0	6	12	1	0	3	0	4	8	1	0	17	4	3	0	1	0	0	0	0	8	0	1
Otu0087	80	112	4	51	16	45	98	78	8	44	101	2	123	57	4	40	83	1	1	20	9	3	0	0	0	1	1	0	1	0	9	1	3	0	1	1	0	3	0	2	0	0	5	0	2	4	1	1	0
Otu0088	0	0	0	0	0	0	0	0	0	0	0	0	0	0	0	0	0	0	0	0	0	0	0	0	0	0	0	0	0	0	0	0	0	0	0	0	0	0	0	0	0	0	0	0	0	0	0	0	1
Otu0089	39	118	19	29	0	34	133	69	4	37	107	2	166	130	1	39	93	1	37	12	5	0	0	0	0	0	0	0	0	0	0	0	0	0	0	0	0	0	0	0	0	0	0	0	0	0	0	0	0
Otu0090	15	0	1	2	2	0	16	0	1	7	16	1	0	0	0	0	9	0	0	6	3	22	3	7	8	16	19	11	3	6	43	17	31	11	14	1	18	39	8	15	14	1	7	24	11	7	17	3	32
Otu0091	0	0	0	0	0	0	0	0	0	0	0	0	0	0	0	0	0	0	0	0	0	3	1	2	0	3	1	0	0	0	0	1	0	1	0	0	0	1	1	1	2	0	38	28	3	17	48	2	6
Otu0092	0	0	0	0	0	0	0	0	0	0	0	0	0	0	0	0	0	0	0	0	0	7	0	2	118	2	0	35	0	48	0	0	1	0	51	395	29	0	362	0	0	0	0	0	0	0	0	0	0
Otu0093	0	0	0	0	0	0	0	0	0	1039	0	0	0	0	0	3	0	0	0	0	0	0	0	0	0	0	0	0	0	0	0	1	0	0	0	0	0	0	0	0	0	0	0	0	0	0	0	0	0
Otu0094	0	0	3	0	0	0	0	0	2	0	0	5	0	0	0	0	0	0	0	0	2	13	9	0	12	10	1	13	0	3	1	0	8	27	1	0	1	2	29	9	570	7	4	11	2	0	1	0	20
Otu0095	0	0	73	0	0	45	0	0	102	0	0	160	0	0	241	0	0	93	0	0	210	0	0	0	0	0	0	0	0	0	0	0	0	0	0	0	1	0	0	0	0	0	0	6	0	0	4	0	0
Otu0096	0	120	15	0	99	21	0	131	10	0	182	6	0	132	6	0	44	4	0	42	33	1	0	0	1	0	2	0	0	0	0	1	0	0	2	0	1	0	1	0	1	1	14	0	0	0	0	1	0
Otu0097	0	0	0	0	0	0	0	0	0	0	0	0	0	0	0	0	0	0	0	0	0	51	18	6	28	7	29	77	22	18	29	3	3	7	2	34	111	5	6	20	22	33	39	25	8	0	54	17	0
Otu0098	0	0	0	0	0	0	0	0	0	0	0	0	0	0	0	0	0	0	0	0	0	1	3	0	0	0	0	0	0	0	1	4	0	0	4	0	1	0	1	0	0	0	76	19	14	20	43	9	9
Otu0099	0	0	0	0	0	0	0	0	0	0	0	0	0	0	0	0	0	0	0	0	0	0	0	0	0	0	0	0	0	0	0	0	0	0	0	0	16	0	0	0	0	0	0	854	0	0	0	0	0
Otu0100	0	0	0	0	0	0	0	0	0	0	0	0	0	0	0	0	27	0	0	0	0	4	0	2	0	0	0	2	0	0	6	2	112	1	0	0	0	0	0	0	1	0	0	0	0	90	18	86	0
Otu0101	13	24	2	18	23	14	13	74	5	8	101	0	18	60	0	3	2	0	29	6	4	0	1	2	0	1	1	0	0	0	4	0	0	2	0	0	0	0	0	0	0	0	6	5	0	5	2	2	0
Otu0102	0	0	0	0	0	0	0	0	0	0	0	0	0	0	0	0	0	0	0	0	0	0	0	0	36	2	0	211	12	145	0	0	0	28	142	95	34	0	135	0	0	3	0	0	0	0	0	0	0
Otu0103	0	0	0	0	0	4	0	0	0	0	0	0	0	0	0	683	0	0	4	0	0	1	3	8	0	1	3	0	0	0	0	9	4	0	1	0	0	0	0	5	0	1	19	4	5	0	1	1	3
Otu0104	0	0	0	0	0	0	0	0	0	0	0	0	0	0	0	0	0	0	0	0	0	0	0	0	1	4	0	0	0	0	5	0	0	1	0	0	0	0	0	0	0	0	39	10	17	11	20	4	0
Otu0105	0	0	0	0	0	0	0	0	0	0	0	0	0	0	0	0	0	0	0	0	0	0	0	0	0	0	0	0	0	0	0	0	0	0	0	0	0	0	0	2	0	0	0	0	0	0	0	0	0
Otu0106	0	0	0	0	0	0	0	0	0	0	0	0	0	0	1	0	0	0	0	0	0	0	0	0	1	0	0	0	0	175	0	0	0	0	0	1	0	0	179	7	6	326	0	0	0	0	0	0	0
Otu0107	0	0	0	0	0	0	12	0	0	0	0	0	0	0	0	0	0	0	0	0	0	47	46	2	4	4	15	14	32	14	31	2	14	7	3	5	0	4	3	5	0	3	8	20	8	8	9	0	103
Otu0108	0	0	0	0	0	0	0	0	0	0	0	0	0	0	0	0	0	0	0	0	0	0	0	0	0	0	0	0	0	0	0	0	0	0	0	0	0	0	0	0	0	0	63	16	19	15	33	5	2
Otu0109	0	0	0	0	0	0	0	0	0	0	0	0	0	0	0	0	0	0	0	0	0	25	11	14	11	7	7	4	0	7	6	1	3	8	4	7	10	16	5	7	6	9	15	6	9	6	11	4	17
Otu0110	0	0	12	0	0	53	0	0	0	0	0	0	0	0	0	0	0	2	0	0	2	2	8	1	13	0	1	2	21	4	0	0	0	22	13	38	5	5	7	4	5	7	0	7	44	0	0	0	8
Otu0111	0	0	0	0	0	0	0	0	0	0	0	0	0	0	0	0	0	0	0	0	0	10	0	11	1	2	1	2	2	0	0	1	4	0	3	0	1	0	0	1	0	6	31	16	18	10	28	0	2
Otu0112	0	0	0	0	0	0	0	0	0	0	0	0	0	0	0	0	0	0	0	0	0	0	0	0	1	0	0	0	0	0	0	0	0	0	695	0	0	0	0	3	0	0	0	0	0	0	0	0	0
Otu0113	0	0	14	0	0	18	0	0	63	0	0	14	0	0	51	0	0	14	0	0	131	13	5	3	23	6	1	19	31	7	22	3	11	13	0	26	51	10	46	13	12	0	0	7	0	4	5	5	7
Otu0114	27	137	5	32	0	14	54	68	3	28	0	1	119	36	0	0	51	2	74	3	1	0	0	0	0	0	0	0	0	0	0	0	0	0	0	0	0	0	0	0	0	0	0	0	0	0	0	0	0
Otu0115	0	0	0	0	0	0	0	0	0	0	0	0	0	0	0	0	0	0	0	0	0	0	0	16	0	0	8	0	0	0	0	0	0	1	0	2	1	0	0	0	3	0	0	18	28	0	2	8	0
Otu0116	0	0	0	0	0	0	0	0	0	0	0	0	0	0	0	0	0	0	0	0	0	0	0	0	0	0	0	0	0	0	0	0	0	0	0	0	0	0	0	0	0	0	0	0	0	0	0	0	0
Otu0117	0	0	0	0	0	0	0	0	0	0	0	0	0	0	2	0	0	0	0	0	0	18	17	9	9	0	3	0	8	0	0	434	2	0	2	0	7	0	1	0	5	2	48	0	1	0	10	0	1
Otu0118	0	0	0	0	0	0	0	0	0	15	0	0	42	0	0	567	11	1	0	0	0	0	0	0	0	0	0	0	0	0	0	0	0	0	0	0	0	0	0	0	0	0	0	0	0	0	0	0	0
Otu0119	0	0	0	0	0	0	0	0	0	164	434	0	29	0	0	0	0	0	0	0	0	0	0	0	0	0	0	0	0	0	0	0	0	0	0	0	0	0	0	0	0	0	0	0	0	0	0	0	0
Otu0120	0	0	18	0	0	11	0	0	37	0	0	7	0	0	9	0	0	90	0	0	49	24	102	5	17	0	2	3	6	0	0	0	2	0	15	2	11	84	9	4	18	6	9	2	9	0	0	0	0
Otu0121	0	0	1	0	0	0	0	0	2	0	0	0	0	0	0	0	0	0	0	0	0	32	6	13	45	15	0	89	17	8	6	5	8	21	6	36	6	21	0	10	13	10	8	3	20	0	1	3	0
Otu0122	0	0	0	0	0	0	0	0	0	0	0	0	0	0	0	0	0	0	0	0	0	10	37	1	91	1	0	9	20	0	1	1	1	0	4	1	45	5	3	13	72	0	0	20	3	0	10	0	53
Otu0123	0	0	9	0	0	54	0	0	27	0	0	4	0	0	1	0	0	2	0	0	38	12	166	12	0	12	1	5	20	16	12	5	12	5	45	8	4	10	2	17	6	10	0	2	2	0	3	0	0
Otu0124	0	241	0	19	0	15	60	0	1	0	0	0	67	0	0	9	0	0	190	0	0	0	0	0	0	0	0	0	0	0	0	0	0	0	0	0	0	0	0	0	0	0	0	0	0	0	0	9	0
Otu0125	6	36	4	11	43	10	76	103	2	21	43	2	110	29	1	37	21	2	23	30	4	0	0	0	0	0	0	0	0	0	0	0	0	0	0	0	0	0	0	0	0	0	0	0	0	0	0	0	0
Otu0126	4	0	0	0	2	2	0	0	0	5	0	0	0	7	0	0	0	0	0	0	0	5	3	7	0	6	6	1	2	0	7	2	4	2	0	1	0	5	0	6	1	0	30	9	1	4	10	7	0
Otu0127	0	48	20	0	12	8	0	9	5	0	164	3	0	0	3	0	41	4	0	38	12	4	2	1	9	1	9	1	2	1	1	21	1	8	11	4	2	2	9	31	31	0	0	8	0	4	0	2	0
Otu0128	0	0	0	0	0	0	0	0	0	0	1	0	0	0	0	0	0	0	0	0	0	6	2	5	2	4	3	0	7	0	0	0	3	1	1	0	0	6	1	3	4	3	72	17	13	17	35	8	6
Otu0129	38	122	0	1	3	1	94	24	1	12	0	0	176	8	2	25	14	0	39	1	0	0	0	0	0	0	0	0	0	0	0	0	0	0	0	0	0	0	0	0	0	0	0	0	0	0	0	0	0
Otu0130	4	116	2	13	11	21	10	36	3	28	72	1	203	0	0	0	17	1	21	14	2	0	0	0	0	0	0	0	0	0	0	0	0	0	0	0	0	0	0	0	0	0	0	0	0	0	0	0	0
Otu0131	0	0	5	11	5	15	0	0	0	65	0	4	0	18	3	97	0	0	0	0	5	7	5	26	4	15	9	1	9	1	3	11	8	2	0	3	1	15	3	26	8	1	17	19	5	3	13	0	0
Otu0132	30	22	3	1	5	0	39	26	2	4	50	0	307	35	1	9	4	0	11	11	0	0	0	0	0	0	0	0	0	0	0	0	0	0	0	0	0	0	0	0	0	0	0	0	0	0	0	0	0
Otu0133	0	0	0	0	0	0	0	0	0	0	0	0	0	0	0	0	0	0	0	0	0	0	0	0	0	0	0	0	0	0	0	0	0	0	0	0	0	0	0	0	0	0	115	25	13	3	39	6	5
Otu0134	0	0	0	0	0	0	0	0	2	526	0	0	0	0	0	0	0	0	0	0	0	1	0	0	1	0	0	0	4	0	0	0	0	0	0	0	0	0	1	0	0	0	0	0	0	0	0	0	0
Otu0135	0	0	0	0	0	0	0	0	0	0	0	0	0	0	0	0	0	0	0	0	0	3	1	6	1	1	1	1	1	0	7	3	4	1	3	0	1	0	1	2	0	1	95	10	10	1	9	7	5
Otu0136	94	0	0	0	262	0	0	5	0	0	0	0	0	0	0	0	15	0	0	0	0	7	0	0	0	0	1	7	23	1	10	0	5	14	11	0	0	4	1	40	2	1	0	0	0	2	0	1	0
Otu0137	0	0	60	0	0	28	0	0	29	0	0	46	53	0	22	0	0	10	0	0	92	1	0	7	5	0	12	0	1	3	4	0	4	0	12	0	16	3	0	25	3	1	0	0	8	0	0	0	0
Otu0138	0	0	8	0	0	32	0	0	31	0	0	37	0	0	96	0	0	16	0	0	111	8	0	1	0	6	3	0	0	0	1	0	0	1	0	1	5	0	0	0	0	0	0	38	0	0	1	0	26
Otu0139	0	0	0	0	0	0	0	0	0	0	0	0	0	0	0	0	0	0	0	0	0	0	0	0	0	0	0	0	0	0	0	0	0	0	0	0	0	0	0	0	0	0	58	40	0	14	16	6	9
Otu0140	0	0	0	0	0	0	0	0	0	0	0	0	0	0	0	0	0	0	0	0	0	2	1	1	0	3	0	1	1	0	5	1	0	0	0	0	1	2	0	3	3	1	28	17	1	0	7	0	4
Otu0141	0	0	0	0	0	0	0	0	0	474	0	0	0	0	0	0	0	0	0	0	0	0	0	0	0	0	0	0	0	0	0	0	0	0	0	0	0	0	0	0	0	0	0	0	0	0	0	0	0
Otu0142	4	0	0	0	4	0	0	178	0	0	0	0	0	0	0	0	0	0	0	0	0	2	2	5	2	11	6	2	15	1	10	2	12	4	2	1	2	12	1	15	7	1	52	1	0	2	11	0	0
Otu0143	0	0	0	0	0	0	0	0	0	26	0	0	0	0	0	0	0	3	0	0	2	2	1	3	4	1	3	6	9	8	4	1	6	16	2	24	1	10	2	4	0	4	0	4	1	0	1	0	1
Otu0144	4	88	2	1	4	0	43	39	2	4	15	0	177	8	1	5	16	0	2	1	0	0	0	0	0	0	0	0	0	0	0	0	0	0	0	0	0	0	0	0	0	0	0	0	0	0	0	0	0
Otu0145	3	0	6	0	0	8	0	0	0	0	0	4	26	0	0	0	0	0	0	0	1	19	17	9	7	8	1	11	4	0	2	46	14	1	0	18	8	1	6	7	7	14	0	1	22	0	10	1	42
Otu0146	0	0	0	0	0	0	0	0	8	0	0	9	0	0	18	0	0	19	0	0	0	0	0	0	39	0	0	33	0	12	0	0	0	15	27	0	41	0	32	0	131	52	0	0	0	0	0	0	0
Otu0147	0	95	10	3	0	0	8	0	0	4	0	0	0	0	0	0	0	0	0	0	0	0	0	0	0	0	0	0	0	0	0	0	0	0	0	0	0	0	0	0	0	0	0	1	0	1	0	0	0
Otu0148	0	0	0	0	0	0	0	0	0	442	0	0	0	0	0	0	0	0	0	0	0	0	0	0	0	0	0	0	0	0	0	0	0	0	0	0	0	0	0	0	0	0	0	0	0	0	0	0	0
Otu0149	0	0	0	0	0	0	0	0	0	0	0	0	0	0	0	436	0	0	0	0	0	0	0	0	0	0	0	0	0	0	0	0	0	1	1	2	0	0	0	2	0	0	0	0	0	0	0	0	0
Otu0150	0	0	0	0	0	0	0	0	0	0	0	0	0	0	0	0	0	0	0	0	0	5	1	3	2	39	6	15	4	3	19	11	10	4	0	1	0	41	48	87	16	4	0	0	0	0	0	0	0
Otu0151	3	11	15	5	0	24	0	0	4	0	17	28	0	0	24	0	0	12	8	0	52	1	1	3	4	3	1	8	17	0	6	4	3	0	2	0	3	0	0	29	64	7	0	3	0	6	0	0	11
Otu0152	0	0	0	0	0	0	0	0	0	430	0	0	0	0	0	0	0	0	0	0	0	0	0	0	0	0	0	0	0	0	0	0	0	0	0	0	0	0	0	0	0	0	0	0	0	0	0	0	0
Otu0153	0	0	0	0	0	0	0	0	0	0	0	0	0	0	0	0	0	0	0	0	0	2	29	0	92	0	0	25	7	16	0	1	3	12	35	4	16	121	17	0	32	15	0	0	0	0	0	0	0
Otu0154	0	0	50	0	0	12	0	0	20	0	0	31	0	0	22	0	0	11	0	0	60	0	0	4	0	1	2	0	0	1	0	1	5	0	0	2	0	1	0	0	0	2	35	4	2	0	3	1	1
Otu0155	0	0	0	0	0	13	0	0	0	9	0	0	403	0	0	0	0	0	0	0	0	0	0	0	0	0	0	0	0	0	0	0	0	0	0	0	0	0	0	0	0	0	0	0	0	0	0	0	0
Otu0156	0	0	0	0	0	0	0	0	0	0	0	0	0	0	0	0	0	0	0	0	0	1	0	2	1	0	0	1	0	0	3	0	3	0	0	0	1	1	0	0	0	0	7	10	1	0	6	5	7
Otu0157	0	0	0	109	4	0	0	0	0	0	0	0	0	0	0	0	0	0	0	0	0	13	14	1	14	12	7	1	8	1	12	0	4	7	3	10	4	24	11	4	6	3	7	0	1	2	1	0	0
Otu0158	0	0	0	0	0	0	0	0	0	0	0	0	0	0	0	0	0	0	0	2	0	6	2	9	0	5	4	1	0	0	20	6	7	1	0	0	0	11	0	8	0	2	8	3	1	4	7	4	3
Otu0159	0	1	8	1	23	2	0	3	25	7	47	40	2	1	15	0	1	2	0	1	30	2	5	0	0	1	1	0	0	0	0	0	0	1	6	1	14	16	0	0	1	1	0	6	2	3	6	4	12
Otu0160	7	0	2	0	0	0	0	0	21	3	27	2	13	0	7	0	0	7	0	2	22	7	1	1	9	0	0	0	3	2	0	2	0	2	13	29	1	0	13	8	36	0	0	0	0	0	0	0	0
Otu0161	11	69	8	13	28	3	22	21	5	20	0	1	46	10	6	26	11	0	57	8	11	0	0	1	0	0	1	0	0	0	0	0	0	0	0	0	0	0	0	0	0	0	0	1	0	0	2	0	0
Otu0162	0	0	0	0	0	0	0	0	0	0	0	0	0	0	0	0	0	0	0	0	0	21	20	41	6	19	15	1	12	3	8	15	13	3	11	2	2	19	2	27	5	2	25	6	7	4	2	1	0
Otu0163	0	0	0	0	0	0	0	0	0	0	0	0	0	0	0	0	0	0	0	0	0	35	0	0	0	5	12	0	0	0	15	0	0	0	0	0	0	0	0	18	0	0	0	18	0	0	2	0	0
Otu0164	23	58	0	3	4	0	74	16	0	14	12	0	42	42	0	6	30	0	6	0	0	0	0	0	0	0	0	0	0	0	0	0	0	0	0	0	0	0	0	0	0	0	5	0	1	0	0	0	0
Otu0165	0	0	0	0	0	0	0	0	0	0	0	0	0	0	0	0	0	0	0	0	0	0	0	0	0	0	0	0	4	0	0	0	0	1	1	0	0	0	0	0	0	0	76	6	6	0	4	6	2
Otu0166	0	8	7	0	8	1	0	0	1	0	1	5	0	5	7	0	0	0	0	2	14	12	4	4	3	3	1	1	2	0	13	4	2	6	2	0	3	3	0	10	1	3	4	23	5	0	4	0	20
Otu0167	0	0	0	0	0	0	0	0	0	0	0	0	0	0	0	0	0	0	0	0	0	0	0	0	1	0	0	0	0	0	1	0	0	0	0	0	0	0	0	0	0	0	26	1	2	1	7	0	13
Otu0168	0	0	0	0	0	0	0	0	0	0	0	0	0	0	0	0	0	0	0	0	0	0	0	0	0	0	0	0	0	0	0	0	0	0	0	0	0	0	0	0	0	0	0	0	0	0	0	0	0
Otu0169	0	0	0	0	0	0	0	0	1	0	0	0	0	0	0	0	0	0	0	0	0	4	0	0	4	0	0	1	18	1	0	0	0	0	21	0	8	174	2	2	47	7	0	0	3	0	0	0	17
Otu0170	0	0	126	0	0	68	0	0	79	0	0	15	0	0	4	0	0	19	0	5	24	0	0	0	0	0	0	0	0	0	0	0	0	0	0	0	0	0	0	0	0	0	0	0	0	0	0	0	0
Otu0171	0	0	0	0	0	0	0	0	0	0	0	0	0	0	0	0	0	0	0	0	0	6	2	8	2	3	2	1	4	0	3	0	2	0	0	1	1	9	0	14	1	0	3	5	3	0	5	0	5
Otu0172	0	0	0	0	0	0	0	0	0	0	0	0	0	0	0	0	0	0	0	0	0	11	0	1	9	3	0	5	2	2	0	9	0	9	15	3	4	0	3	0	11	2	6	0	6	0	9	4	10
Otu0173	0	0	0	19	0	0	0	0	0	0	0	0	0	0	0	317	0	0	0	0	0	0	0	0	0	0	0	0	0	0	0	0	0	0	0	0	0	0	0	0	0	0	0	0	0	0	0	0	0
Otu0174	0	0	0	0	0	0	0	0	0	0	0	0	0	0	0	0	0	0	0	0	0	5	3	0	0	0	0	0	0	0	2	0	3	2	0	1	0	0	1	0	0	1	6	22	1	1	8	5	4
Otu0175	0	0	0	0	0	0	0	0	0	0	0	0	0	0	0	0	0	0	0	0	0	0	0	0	0	0	0	0	0	0	0	0	0	0	0	0	0	0	0	4	0	0	0	4	0	0	0	0	0
Otu0176	0	0	0	0	0	0	0	0	0	0	0	1	0	0	0	0	0	64	0	0	0	0	0	0	0	0	0	0	0	75	0	0	0	0	5	33	18	0	81	0	5	8	0	0	0	0	0	0	0
Otu0177	45	68	0	10	1	32	28	3	2	4	15	1	34	0	0	14	1	0	4	4	1	0	0	0	0	1	0	0	0	0	0	0	0	0	0	0	0	0	0	2	0	0	0	0	0	0	0	0	1
Otu0178	69	91	0	0	0	0	63	0	0	0	0	0	41	0	0	12	18	0	0	0	0	0	0	0	0	0	0	0	0	0	0	0	0	0	0	0	0	0	0	0	0	0	0	0	0	0	0	0	0
Otu0179	0	0	0	0	0	0	0	0	0	0	0	0	0	0	0	0	0	0	0	0	0	0	0	0	0	0	0	0	0	0	0	0	0	0	0	0	0	0	0	0	0	0	0	0	0	0	0	0	0
Otu0180	0	0	0	0	0	0	0	0	0	0	0	0	0	0	0	0	0	0	0	0	0	5	0	1	0	2	0	0	2	0	0	6	0	0	1	0	0	0	0	15	0	0	11	10	1	2	12	2	5
Otu0181	0	0	0	0	6	0	0	3	6	0	0	3	0	0	3	0	0	1	0	4	4	0	0	0	0	0	0	4	0	0	0	0	2	0	0	0	2	0	0	0	0	1	5	2	3	0	0	0	28
Otu0182	0	0	0	0	0	1	0	0	0	0	0	0	0	0	8	0	0	3	0	0	0	0	0	0	79	0	0	1	0	39	0	0	0	0	20	38	26	38	4	0	0	17	0	0	0	0	0	0	0
Otu0183	0	0	0	0	0	0	0	0	0	0	0	0	0	0	0	0	0	0	0	0	0	0	0	0	0	0	0	0	0	69	0	0	0	0	0	1	0	0	62	0	0	156	0	0	0	0	0	0	0
Otu0184	6	10	2	6	0	0	8	23	1	5	34	0	107	63	0	0	0	0	16	2	1	0	0	0	0	0	0	0	0	0	0	0	0	0	0	0	0	0	0	0	0	0	0	0	0	0	0	0	0
Otu0185	0	0	0	0	9	0	0	41	1	0	0	0	0	0	3	0	8	2	0	0	4	12	8	2	12	3	0	2	1	5	0	3	0	8	27	4	7	2	2	8	0	9	13	0	0	0	4	0	0
Otu0186	3	111	0	6	0	2	5	0	1	5	33	0	0	0	0	3	44	0	0	0	4	0	0	0	0	0	0	0	0	0	0	0	0	0	0	0	0	0	0	1	0	0	0	0	0	1	0	0	0
Otu0187	0	0	0	0	0	0	0	0	0	0	0	0	0	0	0	0	0	0	0	0	0	2	0	0	1	0	0	0	0	0	0	0	0	0	0	0	0	1	2	0	0	1	45	13	7	4	8	1	2
Otu0188	0	0	0	0	0	0	0	0	0	0	0	0	0	0	0	0	0	0	0	0	0	0	0	0	2	7	0	67	0	162	1	0	3	1	0	14	5	3	0	0	0	4	0	0	0	0	0	0	0
Otu0189	31	22	0	0	0	12	38	0	0	2	0	3	32	0	0	13	90	0	11	0	0	0	0	0	0	0	0	0	0	0	0	0	0	0	0	0	0	0	0	0	0	0	0	0	0	0	0	0	0
Otu0190	4	0	0	178	26	0	0	2	0	0	0	0	0	22	0	6	0	0	20	0	0	0	0	0	0	1	0	1	0	0	4	0	0	0	0	0	0	1	0	1	0	0	0	0	0	0	0	0	0
Otu0191	0	0	0	0	3	0	0	0	0	0	0	0	0	0	0	0	0	0	0	0	0	0	0	0	0	0	0	0	0	0	0	0	0	0	0	0	0	0	0	0	0	0	0	0	0	0	0	0	0
Otu0192	0	0	0	0	0	0	0	0	0	0	0	0	0	0	0	0	0	0	0	0	0	2	0	4	0	2	2	0	1	0	0	2	2	0	0	0	0	0	0	2	0	0	0	6	2	5	10	0	2
Otu0193	0	0	0	0	0	0	0	0	0	0	0	0	0	0	0	0	0	0	0	0	0	1	1	0	34	0	3	0	2	0	0	0	2	0	1	0	4	2	0	1	2	1	0	3	4	0	1	0	2
Otu0194	0	0	3	0	0	0	0	0	1	173	0	0	0	0	0	0	0	1	0	0	0	0	10	0	9	0	0	1	15	0	0	5	2	0	0	2	2	8	5	5	4	0	0	0	0	0	0	0	0
Otu0195	4	0	3	0	2	0	0	12	0	10	10	2	0	24	0	4	0	0	16	13	0	2	0	0	0	0	0	0	3	0	0	0	0	0	0	0	0	0	0	4	0	0	0	0	0	0	0	1	0
Otu0196	0	0	0	0	0	0	0	0	0	0	0	0	0	0	0	0	0	0	0	0	0	1	5	0	52	0	0	10	5	5	0	0	0	0	21	17	8	14	10	0	74	7	0	0	0	0	0	0	0
Otu0197	0	0	0	0	0	0	0	0	0	0	0	0	0	0	0	0	0	0	0	0	2	0	0	0	0	1	0	2	4	8	0	0	0	1	225	0	0	0	1	0	0	0	0	0	0	0	0	0	0
Otu0198	0	0	0	0	0	0	0	0	0	0	0	0	0	0	0	0	0	0	0	0	0	0	0	0	20	0	0	1	1	6	0	0	0	1	65	117	0	0	10	1	0	20	0	0	0	0	0	0	0
Otu0199	1	0	2	4	3	12	5	0	0	1	4	1	0	15	0	2	0	0	26	1	0	0	0	4	0	0	0	0	1	0	0	0	2	0	0	0	0	0	0	0	0	0	0	3	0	0	0	0	1
Otu0200	0	4	1	9	0	6	18	0	0	8	38	2	100	0	0	0	0	0	0	0	0	0	0	0	0	0	0	0	0	0	0	0	0	0	0	0	0	0	0	0	0	0	0	0	0	0	0	0	0
Otu0201	0	0	0	0	0	0	0	0	0	0	0	0	0	0	0	0	0	0	0	0	0	144	0	85	0	0	0	0	0	0	0	0	0	0	0	0	0	0	0	0	0	0	0	0	0	0	0	0	0
Otu0202	0	23	0	1	27	0	0	8	0	0	23	0	0	0	0	0	27	0	0	0	3	0	0	1	0	1	0	0	0	0	0	0	2	1	0	0	0	0	0	0	0	0	21	1	7	0	4	1	5
Otu0203	0	0	0	0	0	0	0	0	0	0	0	0	0	0	0	0	0	0	0	0	0	7	3	8	4	4	5	1	0	2	0	0	6	2	1	1	0	1	0	0	3	1	8	4	0	0	2	1	0
Otu0204	0	0	0	0	0	0	0	0	0	0	0	0	0	0	0	0	0	0	0	0	0	7	4	10	1	2	5	2	0	4	4	2	0	0	0	1	0	5	1	0	0	11	0	4	5	0	0	0	3
Otu0205	0	4	0	0	12	0	0	0	0	0	10	0	0	0	0	0	0	0	0	5	0	0	0	2	0	0	0	0	0	0	0	0	2	0	0	0	0	0	0	0	0	0	8	6	16	5	5	1	2
Otu0206	0	0	0	0	0	0	0	0	0	0	0	0	0	0	0	0	0	0	0	0	0	0	0	0	4	0	0	3	2	0	0	0	2	20	10	0	0	1	0	0	170	10	0	0	0	0	0	0	0
Otu0207	0	0	4	6	0	0	0	10	0	0	1	0	172	0	0	1	0	0	0	0	0	0	0	0	0	0	1	0	0	0	3	0	1	0	0	0	0	0	0	0	0	0	3	0	0	0	0	0	0
Otu0208	0	0	0	0	0	0	0	0	0	0	0	0	0	0	0	0	0	0	0	0	0	2	2	0	0	0	0	0	0	0	0	2	0	0	0	0	0	0	0	1	0	0	0	0	0	0	0	0	0
Otu0209	0	27	0	5	3	0	0	45	0	12	58	0	0	43	1	16	0	0	0	2	2	0	0	0	0	0	0	0	0	0	0	0	0	0	0	0	0	0	0	0	0	0	0	0	0	0	0	0	0
Otu0210	0	0	0	0	0	0	0	0	0	0	0	0	0	0	0	0	0	0	0	0	0	4	0	2	0	1	0	0	0	0	0	0	0	0	0	0	0	17	1	11	8	0	0	0	0	7	7	0	0
Otu0211	0	0	0	0	0	0	0	0	0	0	0	0	0	0	0	0	0	0	0	0	0	0	1	1	0	1	2	0	2	0	0	1	2	0	0	0	0	2	0	0	1	0	9	0	0	3	5	1	3
Otu0212	0	39	0	0	3	8	28	0	0	0	2	0	35	0	0	0	6	0	0	0	0	0	0	0	0	0	0	0	0	0	0	0	0	0	0	0	0	0	0	0	0	0	0	0	0	0	0	0	0
Otu0213	0	0	0	0	0	0	193	0	0	0	0	0	0	0	0	0	0	0	0	0	0	0	0	0	0	0	0	0	0	0	0	0	0	0	0	0	0	0	0	0	0	0	0	0	0	0	0	0	0
Otu0214	0	0	0	0	0	0	0	0	0	0	0	0	0	0	0	0	0	0	0	0	0	0	0	0	0	0	0	0	0	0	0	0	0	0	0	0	0	0	0	0	0	0	0	2	3	1	6	0	2
Otu0215	0	0	0	0	0	0	0	0	0	0	0	0	0	0	0	0	0	0	0	0	0	3	0	3	0	2	3	0	2	0	3	0	4	1	0	0	0	3	0	1	0	0	6	4	0	0	1	1	0
Otu0216	1	0	1	1	0	7	1	8	0	0	26	0	52	1	0	1	9	1	11	5	0	0	0	1	0	0	0	0	0	0	0	0	2	0	0	0	0	0	0	1	0	0	5	1	0	0	2	0	0
Otu0217	0	0	0	1	0	0	0	0	0	169	0	0	0	0	0	0	0	0	0	0	1	0	0	0	1	0	0	0	0	0	0	2	0	0	0	0	0	0	0	5	0	0	0	1	0	0	0	0	0
Otu0218	0	0	1	0	0	10	0	0	0	0	0	0	0	0	1	0	0	0	0	0	0	2	0	0	26	1	1	1	4	7	1	0	3	0	0	2	3	5	12	1	1	0	0	0	0	0	0	0	0
Otu0219	0	0	0	0	0	0	0	0	0	0	0	0	0	0	0	0	0	0	0	0	0	0	0	0	0	0	0	0	0	0	0	0	0	0	0	0	0	0	0	0	0	0	12	1	0	2	2	1	2
Otu0220	0	0	0	0	0	0	0	0	0	180	0	0	0	0	0	0	0	0	0	0	0	0	0	0	0	0	0	0	0	0	0	0	0	0	0	0	0	0	0	0	0	0	0	0	0	0	0	0	0
Otu0221	0	0	0	0	0	0	0	0	0	0	0	0	0	0	0	0	0	0	0	0	0	0	0	6	0	0	2	0	0	1	0	0	4	0	0	1	0	3	0	0	0	0	19	2	2	0	2	0	0
Otu0222	0	79	0	0	0	0	5	0	0	0	0	0	81	7	0	2	0	0	0	0	0	0	0	0	0	0	0	0	0	0	0	0	0	0	0	0	0	0	0	0	2	0	0	0	0	0	0	0	0
Otu0223	0	132	0	0	8	0	0	0	0	0	28	0	0	9	0	0	0	0	0	0	0	0	0	0	0	0	0	0	0	0	0	0	0	0	0	0	0	0	0	0	0	0	0	0	0	0	0	0	0
Otu0224	9	105	0	0	55	6	0	0	1	0	0	0	0	0	0	0	0	1	0	0	0	0	0	0	0	0	0	0	0	0	0	0	0	0	0	0	0	0	0	0	0	0	0	0	0	0	0	0	0
Otu0225	0	0	0	0	0	0	0	0	0	154	0	0	0	0	0	0	0	0	0	0	0	0	0	0	0	0	0	1	0	0	0	0	0	0	0	0	0	0	1	3	0	0	0	0	2	0	0	0	0
Otu0226	0	0	0	0	0	0	38	0	0	0	0	0	0	0	0	0	108	0	0	0	0	0	0	0	0	0	0	0	0	0	0	0	0	0	0	0	0	0	0	0	0	0	0	0	0	0	0	0	0
Otu0227	0	0	0	0	0	0	0	0	0	0	0	0	0	0	0	0	0	0	0	0	0	19	0	4	3	8	10	8	2	5	58	3	14	19	3	6	0	2	0	4	4	1	0	0	0	0	0	0	0
Otu0228	0	0	0	0	0	0	0	0	0	0	0	0	0	0	0	0	0	0	0	0	0	1	0	2	0	0	0	0	0	0	0	0	1	1	0	0	0	1	0	1	0	0	7	1	10	1	6	0	0
Otu0229	0	152	0	0	0	0	0	0	0	0	0	0	0	0	0	0	0	0	15	0	1	0	0	0	0	0	0	0	0	0	0	0	0	0	0	0	0	0	0	0	0	0	0	0	0	0	0	0	0
Otu0230	0	0	0	0	0	0	0	0	0	0	0	0	0	0	0	92	0	0	0	0	0	1	3	2	3	1	0	0	8	0	0	1	1	0	0	4	0	24	2	2	0	1	0	0	0	0	3	0	0
Otu0231	10	15	0	7	10	8	0	39	0	9	44	0	0	0	1	5	8	0	2	0	3	0	0	1	0	0	0	0	0	0	0	0	2	0	0	0	0	0	0	1	0	0	0	0	0	1	0	0	0
Otu0232	0	0	162	0	0	7	0	0	0	0	0	0	0	0	0	0	0	0	0	0	0	0	0	0	0	0	0	0	0	0	0	0	0	0	0	0	0	0	0	0	0	0	0	0	0	0	0	0	0
Otu0233	0	0	33	3	0	31	0	0	31	0	0	3	0	0	5	0	0	24	0	0	15	0	0	0	2	0	0	0	0	0	0	1	0	0	0	0	0	7	0	0	0	0	2	0	0	0	0	0	0
Otu0234	0	0	0	0	0	0	0	0	0	0	0	0	0	0	0	0	0	0	0	0	0	0	10	0	25	0	0	4	1	4	0	0	0	0	45	3	4	3	8	0	57	1	0	0	0	0	0	0	0
Otu0235	0	0	0	0	0	0	0	0	0	119	0	0	0	0	0	21	0	0	0	0	0	2	0	1	2	1	0	1	2	1	0	6	0	0	4	4	0	0	2	0	0	0	0	0	0	0	0	0	0
Otu0236	0	0	0	0	0	0	0	0	0	0	0	0	0	0	0	0	0	0	0	0	0	0	0	2	0	4	0	0	0	0	0	0	0	0	0	0	158	0	0	1	0	1	0	0	0	0	0	0	0
Otu0237	0	0	10	2	0	0	0	0	0	0	0	0	0	0	0	0	0	0	0	0	8	17	3	0	8	4	0	8	1	2	0	0	0	1	0	4	4	42	5	3	2	15	0	0	0	0	1	0	3
Otu0238	0	0	0	0	0	0	0	0	0	0	0	0	0	0	0	0	0	0	0	0	0	0	0	0	0	0	0	0	7	1	0	0	0	0	0	0	0	0	0	0	0	0	0	70	0	0	76	0	0
Otu0239	0	0	0	0	0	0	0	0	0	0	0	0	0	0	0	0	0	0	0	0	0	0	0	0	0	0	0	0	0	0	0	0	0	0	0	0	0	0	0	0	0	0	25	18	5	0	9	1	1
Otu0240	0	0	0	0	0	0	0	0	0	0	0	0	0	0	0	0	0	0	0	0	0	0	0	0	0	0	0	0	0	0	0	0	0	0	0	0	0	0	0	0	0	0	0	0	0	0	0	0	0
Otu0241	0	0	0	0	0	0	0	0	0	0	0	0	0	0	0	0	0	0	0	0	0	6	0	0	21	0	0	9	1	22	0	0	0	0	18	61	0	0	24	0	0	0	0	0	0	0	0	0	0
Otu0242	0	37	0	0	0	0	0	0	0	0	0	0	121	0	0	0	1	0	0	0	0	0	0	0	0	0	0	0	0	0	0	0	0	0	0	0	0	0	0	0	0	0	0	0	0	0	0	0	0
Otu0243	0	0	4	0	0	4	0	0	0	0	0	0	0	0	0	0	0	0	0	0	0	0	0	0	4	2	0	2	0	3	0	0	2	5	8	31	4	16	20	0	7	8	0	0	0	0	0	0	0
Otu0244	0	21	9	0	0	6	0	0	0	0	0	0	0	0	0	0	0	0	0	0	5	8	4	3	0	1	2	0	1	2	0	0	0	1	3	2	1	5	5	1	5	2	0	0	0	1	0	0	0
Otu0245	0	0	40	0	0	53	0	0	0	0	0	16	0	0	10	0	0	0	0	0	36	0	0	0	0	0	0	0	0	0	0	0	0	0	0	0	0	0	0	0	0	0	0	0	0	0	0	0	0
Otu0246	0	0	0	0	0	0	0	0	0	0	0	0	0	0	0	0	0	0	0	0	0	0	2	0	0	13	0	0	0	0	0	2	2	0	1	0	0	1	0	2	0	0	0	0	0	0	0	0	0
Otu0247	0	0	0	0	0	0	0	0	1	4	19	1	128	0	0	0	0	0	0	0	0	0	0	0	0	0	0	0	0	0	0	0	0	0	0	0	0	0	0	0	0	0	0	0	0	0	0	0	0
Otu0248	0	0	32	0	0	26	0	0	63	0	0	8	0	0	3	0	0	1	0	0	14	0	0	0	0	0	0	0	0	0	0	0	0	0	0	0	0	0	0	0	0	0	0	0	0	0	0	0	0
Otu0249	0	0	0	0	0	0	0	0	0	0	0	0	0	0	0	0	0	0	0	0	0	0	0	0	0	0	0	0	147	0	0	0	0	0	0	0	0	0	0	0	0	0	0	0	0	0	0	0	0
Otu0250	0	0	0	0	0	0	0	0	0	0	0	0	0	0	0	0	0	0	0	0	0	7	1	9	0	27	15	0	0	0	46	0	13	8	1	4	0	0	1	4	8	0	0	0	0	0	0	0	0
Otu0251	0	0	0	0	0	0	0	0	0	0	0	0	0	0	0	0	0	2	0	0	0	0	0	0	16	0	1	23	13	6	0	0	0	0	9	0	27	21	6	0	0	10	0	0	0	0	0	0	0
Otu0252	0	0	0	0	0	0	0	0	0	0	0	0	0	0	0	0	0	0	0	0	0	0	0	0	0	0	0	0	0	0	0	0	0	0	0	0	0	0	0	0	0	0	0	0	0	0	0	0	0
Otu0253	0	0	0	0	0	0	0	0	0	0	0	0	0	0	0	1	0	0	0	0	0	3	1	2	0	5	1	0	0	0	0	5	3	3	1	0	1	0	0	0	1	0	12	2	5	4	4	1	1
Otu0254	0	0	0	0	0	0	0	0	0	0	0	0	0	0	0	0	0	3	0	0	0	0	0	1	1	0	1	0	0	11	2	0	0	0	8	19	31	3	6	1	2	39	0	1	3	0	0	0	2
Otu0255	0	48	1	0	0	0	0	0	0	0	25	0	39	0	0	0	0	0	0	0	0	0	0	0	0	0	0	0	0	0	0	0	0	0	0	0	0	0	0	0	0	0	0	0	0	0	0	0	0
Otu0256	0	0	34	0	0	10	0	0	7	0	0	9	0	0	12	0	0	0	0	0	60	0	0	0	0	0	0	0	0	0	0	0	0	0	0	0	0	0	0	0	0	0	0	0	0	0	0	0	1
Otu0257	0	0	0	0	0	0	0	0	0	0	0	0	0	0	0	0	0	0	0	0	0	3	3	11	0	8	7	0	2	0	0	1	6	1	0	0	0	1	2	1	0	2	0	0	0	1	5	0	2
Otu0258	0	0	0	0	0	0	0	0	0	0	0	0	0	0	0	0	0	0	0	0	0	0	0	0	0	0	0	0	0	0	0	0	0	0	0	0	0	0	0	0	0	0	1	0	2	0	0	1	0
Otu0259	0	0	0	0	0	0	0	0	0	0	0	0	0	0	0	0	0	0	0	0	0	0	0	0	7	0	0	30	0	43	0	0	0	0	58	0	0	0	0	0	0	0	0	0	0	0	0	0	0
Otu0260	0	21	6	0	4	5	0	15	4	0	46	3	0	0	0	0	0	1	0	0	6	1	0	0	1	1	0	0	0	0	0	1	0	0	0	0	0	0	0	4	4	0	0	2	0	0	0	0	0
Otu0261	0	0	0	0	11	1	6	5	0	5	0	0	44	39	0	3	0	0	0	0	0	2	0	1	0	0	0	0	0	0	0	0	1	0	0	0	0	0	0	1	0	0	0	0	0	0	0	0	0
Otu0262	0	0	0	0	0	0	0	0	0	0	0	0	0	0	0	0	0	0	0	0	0	0	0	0	0	0	0	0	0	0	0	0	0	0	0	0	0	0	0	0	0	0	18	0	3	0	4	2	0
Otu0263	0	0	0	0	0	0	0	0	0	0	0	0	0	0	0	0	0	0	0	0	0	0	1	0	0	0	0	0	0	0	0	0	2	0	1	1	0	0	0	0	0	1	0	0	3	0	0	2	0
Otu0264	0	0	16	0	0	28	0	0	15	0	0	9	0	0	4	0	0	5	0	0	27	0	0	0	0	0	0	0	0	0	0	1	0	0	0	0	1	0	0	0	0	0	0	0	0	0	0	1	0
Otu0265	0	0	0	0	0	0	0	0	1	0	0	0	0	0	0	0	0	1	0	0	0	0	0	0	14	0	0	0	0	15	0	0	0	0	13	0	19	0	11	0	0	41	0	0	0	0	0	0	9
Otu0266	7	11	0	23	0	0	15	0	3	7	0	0	34	0	0	0	8	0	6	3	0	0	0	0	0	0	0	0	0	0	0	0	0	0	1	0	0	0	0	0	0	0	0	0	0	0	0	0	0
Otu0267	0	0	0	0	0	0	0	0	0	0	0	0	0	0	0	0	0	0	0	0	0	0	0	0	0	0	0	0	0	0	0	0	0	0	0	0	0	1	0	0	0	0	0	0	4	0	0	0	0
Otu0268	0	0	0	0	0	0	0	71	0	0	0	29	0	0	0	0	0	0	0	0	0	0	0	0	0	0	0	1	19	2	1	0	0	0	2	0	4	0	2	0	0	0	0	0	0	0	0	0	0
Otu0269	0	0	0	0	0	0	0	0	0	0	0	0	0	0	0	0	0	0	0	0	0	0	0	0	0	0	0	0	0	0	0	0	0	0	0	0	0	0	0	0	0	0	0	0	1	0	1	0	0
Otu0270	0	0	0	9	0	0	0	0	3	43	0	0	0	0	0	12	0	0	0	0	0	1	0	0	2	1	0	3	16	2	0	4	0	0	3	9	0	5	1	1	3	1	0	0	0	0	1	0	0
Otu0271	0	0	0	0	0	0	0	0	0	0	21	0	0	0	0	0	0	0	0	0	0	0	0	0	0	0	0	0	0	0	0	0	0	0	0	0	0	0	0	0	0	0	0	0	0	0	0	0	0
Otu0272	0	0	0	0	0	38	0	0	8	0	14	1	0	18	1	0	0	0	0	6	0	0	1	0	2	0	0	1	4	0	0	2	0	0	2	1	0	0	0	4	9	1	0	0	5	1	0	0	0
Otu0273	0	0	0	0	0	0	0	0	0	0	0	0	0	0	0	0	0	0	0	0	0	0	0	0	0	0	0	0	0	0	0	0	0	0	0	0	0	0	0	0	0	0	0	0	12	0	0	0	0
Otu0274	0	0	0	0	0	0	0	0	0	0	0	0	0	0	0	0	0	0	0	0	0	0	0	0	0	0	0	0	0	0	0	0	0	0	0	0	0	0	62	0	0	65	0	0	0	0	0	0	0
Otu0275	0	0	0	0	0	0	0	0	0	0	0	0	0	0	0	0	0	0	0	0	35	0	0	0	0	0	0	0	0	0	0	0	0	0	92	0	0	0	0	0	0	0	0	0	0	0	0	0	0
Otu0276	0	0	0	0	0	0	0	0	0	0	0	0	0	0	0	0	0	0	0	0	0	6	2	0	13	2	0	0	9	0	0	5	3	2	0	2	4	0	3	30	4	0	0	1	0	0	0	0	0
Otu0277	0	0	1	0	0	0	0	0	2	0	0	3	0	0	0	90	0	0	0	0	0	0	0	0	0	0	0	0	0	0	0	26	0	0	0	0	0	0	0	3	1	0	0	0	0	0	0	0	0
Otu0278	0	0	0	8	0	0	0	0	0	0	0	0	0	0	0	1	0	0	0	0	4	0	1	0	5	0	0	0	1	0	0	14	3	0	0	0	1	25	1	59	0	2	0	0	0	0	0	0	0
Otu0279	0	0	0	10	0	0	0	0	0	0	0	0	1	8	0	0	0	0	0	0	0	0	0	0	0	0	0	0	0	0	0	0	0	0	0	0	0	0	0	0	0	0	0	0	0	0	0	0	0
Otu0280	0	75	0	0	0	0	0	9	0	0	0	0	0	41	0	0	0	0	0	0	0	0	0	0	0	0	0	0	0	0	0	0	0	0	0	0	0	0	0	0	0	0	0	0	0	0	0	0	0
Otu0281	0	0	0	0	0	0	0	0	0	0	0	0	0	0	0	0	0	0	0	0	0	1	0	1	4	1	2	0	0	0	2	1	3	0	0	0	0	0	0	14	0	0	0	0	0	2	7	0	3
Otu0282	0	14	0	0	1	0	0	5	0	0	7	0	38	0	0	0	2	0	0	2	0	0	0	0	0	0	0	0	0	0	0	0	0	0	0	0	0	0	0	0	0	0	0	0	0	0	0	0	0
Otu0283	0	0	0	0	0	0	0	0	0	0	0	0	0	0	0	0	0	0	0	0	0	0	0	0	0	0	0	0	0	0	0	0	0	0	0	0	0	0	0	0	0	0	0	0	0	0	0	0	0
Otu0284	0	0	0	0	0	0	0	0	0	0	0	0	0	0	0	0	0	0	0	0	0	0	0	0	0	0	0	0	0	0	1	0	1	0	0	0	0	0	0	3	0	0	13	0	1	0	0	0	2
Otu0285	0	0	0	0	0	0	0	0	0	0	0	0	0	0	0	0	0	0	0	0	0	0	0	0	0	0	0	0	0	0	0	0	0	0	0	0	0	0	0	0	0	0	0	0	0	0	0	0	0
Otu0286	3	16	5	2	0	6	0	12	0	3	0	0	0	13	0	0	0	0	5	4	0	0	0	0	0	0	0	0	0	0	0	0	0	0	0	0	0	0	0	0	0	0	0	0	1	0	0	0	0
Otu0287	2	0	2	5	20	0	22	0	0	7	40	0	0	0	11	0	0	2	8	0	0	0	0	0	0	0	0	0	0	0	0	0	0	0	0	0	0	0	0	0	0	0	0	0	0	0	0	0	0
Otu0288	0	0	0	0	0	0	0	0	0	4	0	0	0	0	0	0	0	0	0	0	0	1	0	4	4	0	1	1	0	0	0	7	0	0	2	0	0	13	0	18	0	1	0	0	2	0	1	0	0
Otu0289	0	0	0	0	0	0	0	0	0	0	0	0	82	0	0	0	0	0	0	0	1	0	0	0	0	0	0	0	0	0	0	0	0	0	0	0	0	0	1	0	0	0	0	0	0	0	0	2	0
Otu0290	0	0	14	0	0	0	0	0	2	0	0	32	0	0	37	0	0	14	0	0	8	0	0	0	0	0	0	0	0	0	0	0	0	0	0	0	0	0	0	0	0	0	0	0	0	0	0	0	0
Otu0291	0	0	0	0	0	0	0	0	28	0	0	0	0	0	22	0	0	65	0	0	0	0	0	0	0	0	0	0	0	0	0	0	0	0	0	0	0	0	0	0	0	0	0	0	0	0	0	0	0
Otu0292	4	21	3	0	7	0	0	10	0	0	0	0	0	0	1	0	18	0	0	0	0	0	0	0	0	0	0	0	0	0	0	0	0	0	0	0	0	0	0	0	1	0	0	0	0	0	0	0	0
Otu0293	0	0	0	0	0	0	0	0	0	0	0	0	0	0	1	0	0	0	0	0	0	4	0	0	2	0	1	0	2	0	0	2	0	0	1	0	0	3	0	0	1	0	0	0	7	0	0	0	0
Otu0294	38	8	0	0	0	0	13	0	0	0	0	0	45	0	0	2	0	0	7	0	0	0	0	0	0	0	0	0	0	0	0	0	0	0	0	0	0	0	0	0	0	0	0	0	0	0	0	0	0
Otu0295	0	0	0	0	0	0	0	0	0	0	0	0	0	0	0	0	0	0	0	0	0	0	0	0	1	0	2	0	3	0	1	5	0	0	0	0	1	0	0	0	0	0	35	4	0	0	0	0	1
Otu0296	0	0	0	4	0	0	0	0	0	0	0	0	47	0	0	5	0	0	25	0	3	0	0	0	0	0	0	0	0	0	0	0	0	0	0	0	0	0	0	0	0	0	0	0	0	0	0	0	0
Otu0297	0	0	0	0	0	0	0	0	0	0	0	0	0	0	0	0	0	0	0	0	0	0	0	0	0	0	0	0	0	0	0	0	1	0	0	0	0	0	0	0	0	0	0	0	0	0	0	0	4
Otu0298	0	0	0	0	0	0	0	0	0	5	0	4	99	0	0	0	0	0	0	0	0	0	0	0	0	0	0	0	0	0	0	0	0	0	0	0	0	0	0	0	0	0	0	0	0	0	0	0	0
Otu0299	0	0	0	0	0	0	0	0	0	0	0	0	0	0	0	0	0	0	0	0	0	4	0	2	4	11	12	2	16	1	19	3	0	2	3	15	1	4	5	0	0	1	0	0	0	0	0	0	0
Otu0300	0	0	0	0	0	0	0	0	0	0	0	0	0	0	0	0	0	0	0	0	0	0	0	0	0	3	0	97	0	1	3	0	0	0	3	0	0	0	0	0	0	0	0	0	0	0	0	0	0
Otu0301	0	0	0	0	0	0	0	0	0	0	0	0	0	0	0	0	0	0	0	0	0	16	6	4	0	0	8	0	0	0	0	1	6	9	0	1	0	0	0	1	0	0	0	0	0	0	0	0	0
Otu0302	38	0	0	0	0	0	0	6	0	0	9	0	0	0	0	0	0	0	0	0	0	0	0	0	0	0	0	1	0	0	0	0	0	0	0	0	0	0	0	0	0	0	0	0	0	0	0	0	0
Otu0303	0	0	0	0	0	0	0	0	0	0	0	0	0	0	0	0	0	0	0	0	0	0	0	6	0	0	0	0	0	0	0	0	0	0	0	0	0	0	0	0	0	0	14	0	0	0	17	0	0
Otu0304	0	0	0	2	0	0	0	13	0	6	0	0	77	0	0	0	0	0	0	7	0	0	0	0	0	0	0	0	0	0	0	0	0	0	0	0	0	0	0	0	0	0	0	0	0	0	0	0	0
Otu0305	0	0	0	9	9	0	0	0	0	0	0	0	0	0	0	87	0	0	0	0	0	0	0	0	0	0	0	0	0	0	0	0	0	0	0	0	0	0	0	0	0	0	0	0	0	0	0	0	0
Otu0306	0	0	0	0	0	0	0	0	0	0	0	0	105	0	0	0	0	0	0	0	0	0	0	0	0	0	0	0	0	0	0	0	0	0	0	0	0	0	0	0	0	0	0	0	0	0	0	0	0
Otu0307	0	0	0	0	0	0	0	0	0	0	0	0	0	0	0	0	0	0	0	0	0	1	2	9	5	3	3	5	4	0	1	1	3	0	3	8	2	3	1	8	3	5	10	0	0	0	0	0	3
Otu0308	0	0	0	0	0	0	0	0	0	0	0	0	0	0	0	0	0	0	0	0	0	5	2	2	1	5	1	0	1	10	1	6	1	5	9	1	4	5	3	1	2	0	0	0	0	0	0	0	0
Otu0309	0	0	0	0	0	0	0	0	0	0	0	0	0	0	0	80	0	0	0	0	0	0	0	0	0	0	0	0	0	0	0	0	0	0	0	0	0	0	0	0	0	0	0	0	0	0	0	0	0
Otu0310	0	0	0	0	2	0	0	4	0	5	43	0	0	0	0	2	2	0	45	0	0	0	0	0	0	0	0	0	0	0	0	0	0	0	0	0	0	0	0	0	0	0	0	0	0	0	0	0	0
Otu0311	0	0	0	0	0	0	0	0	0	0	0	0	0	0	0	0	0	0	0	0	0	4	1	2	10	1	0	9	13	1	0	10	0	0	24	0	0	0	4	3	1	0	0	0	0	0	0	0	0
Otu0312	0	0	0	0	0	0	0	0	0	0	0	0	2	0	0	0	0	0	0	0	0	0	0	0	0	1	0	0	0	0	0	2	0	1	0	0	0	0	0	0	0	0	3	1	2	15	12	1	0
Otu0313	0	0	0	0	0	0	0	20	0	0	0	0	0	0	0	0	0	0	0	0	0	0	0	0	0	0	0	0	0	0	0	0	0	0	0	0	0	0	0	0	0	0	0	0	0	0	0	0	0
Otu0314	0	0	0	0	0	0	0	0	0	0	0	0	0	0	0	0	0	0	0	0	0	0	0	2	0	0	0	0	0	0	0	0	0	0	0	0	0	0	0	0	0	0	81	0	8	0	0	0	0
Otu0315	0	0	0	12	0	5	0	17	0	8	0	0	0	33	0	0	5	0	2	0	0	0	0	0	0	0	0	0	0	0	2	0	0	0	0	0	0	0	0	0	0	0	0	0	0	1	0	0	0
Otu0316	0	0	0	0	0	0	0	0	0	0	0	0	0	0	0	0	0	0	0	0	0	1	2	0	3	2	0	0	0	7	0	0	1	0	0	0	2	2	0	0	74	4	0	0	0	0	0	0	0
Otu0317	0	0	4	0	0	7	0	25	0	0	9	0	0	12	0	0	0	0	42	0	0	0	0	0	0	0	0	0	0	0	0	0	0	0	0	0	0	0	0	0	0	0	0	0	0	0	0	0	0
Otu0318	0	0	0	14	0	0	0	0	0	2	0	0	63	6	0	8	0	0	0	0	0	0	0	0	0	0	0	0	0	0	0	0	0	0	0	0	0	0	0	0	0	0	0	0	0	0	0	0	0
Otu0319	0	0	0	0	0	0	0	0	0	0	0	0	0	0	0	0	0	0	0	0	0	0	0	0	0	0	0	0	0	0	0	0	0	0	0	0	0	0	0	0	0	0	0	0	0	0	0	0	0
Otu0320	0	0	0	0	0	0	0	0	0	0	0	0	92	0	0	0	0	1	0	0	0	0	0	0	0	0	2	0	0	0	0	0	0	0	0	0	0	0	0	0	0	0	0	0	0	0	0	0	0
Otu0321	0	0	0	0	0	0	10	0	0	0	0	0	0	10	0	63	0	0	0	0	0	0	0	0	0	0	0	0	0	0	0	0	0	0	0	0	0	0	0	0	0	0	2	0	0	0	0	0	0
Otu0322	0	0	0	0	0	0	0	0	0	33	47	0	0	0	0	0	0	0	0	0	0	0	0	0	0	0	0	0	0	0	0	0	0	0	0	0	0	0	0	0	0	0	0	0	0	0	0	6	0
Otu0323	0	0	0	0	0	0	0	0	0	0	0	0	0	0	0	0	0	0	0	0	0	0	0	0	0	0	0	0	0	0	0	0	0	0	0	0	0	0	0	0	0	0	13	10	1	3	0	0	0
Otu0324	0	0	0	0	0	0	0	0	0	0	0	0	0	0	0	0	0	0	0	0	0	0	0	33	0	0	0	0	0	0	0	0	0	0	1	0	0	0	0	0	0	0	0	0	2	0	0	0	0
Otu0325	0	0	20	0	0	19	0	5	2	0	0	8	0	0	9	0	10	1	0	0	20	0	0	0	0	0	0	0	0	0	0	0	0	0	0	0	0	0	0	0	0	1	0	0	0	0	0	0	0
Otu0326	0	0	0	0	0	0	0	0	0	0	0	0	0	0	0	0	0	0	0	0	0	0	0	0	0	0	0	0	0	0	0	0	0	0	0	0	0	11	0	0	0	0	0	0	0	0	0	0	0
Otu0327	0	79	0	0	0	0	0	0	0	0	0	0	0	0	0	0	15	0	0	0	0	0	0	0	0	0	0	0	0	0	0	0	0	0	0	0	0	0	0	0	0	0	0	0	0	0	0	0	0
Otu0328	0	43	0	0	0	0	0	0	0	0	0	0	0	0	0	0	12	0	36	0	0	2	0	0	0	0	0	0	0	0	0	0	0	0	0	0	0	1	0	0	0	0	0	0	0	0	0	0	0
Otu0329	0	0	0	0	0	0	0	0	0	0	0	0	0	0	0	0	0	0	4	6	0	0	0	0	0	0	0	0	0	0	0	0	0	0	0	0	0	0	0	0	0	0	0	0	0	0	0	0	0
Otu0330	0	0	0	0	0	0	0	0	0	0	0	0	0	0	0	0	0	0	0	0	0	0	0	0	0	0	0	0	0	0	0	0	0	2	35	1	12	0	0	0	0	0	0	0	2	0	0	0	0
Otu0331	0	0	0	0	0	0	0	0	0	0	0	0	92	0	0	0	0	0	0	0	0	0	0	0	0	0	0	0	0	0	0	0	0	0	0	0	0	0	0	0	0	0	0	0	0	0	0	0	0
Otu0332	0	0	0	0	0	0	0	0	0	0	0	0	0	0	0	0	0	0	0	0	0	0	0	1	0	0	0	0	0	0	3	0	2	1	0	0	0	0	0	0	0	0	14	4	0	5	3	0	1
Otu0333	0	0	0	0	0	0	0	0	0	91	0	0	0	0	0	0	0	0	0	0	0	0	0	0	0	0	0	0	0	0	0	0	0	0	0	0	0	0	0	0	0	0	0	0	0	0	0	0	0
Otu0334	0	0	0	0	0	0	0	0	0	0	0	0	0	0	0	0	0	0	0	0	0	1	0	3	0	1	0	0	0	0	0	1	1	0	1	0	0	2	1	0	0	0	5	1	1	2	2	0	1
Otu0335	0	0	0	0	0	0	22	0	0	6	11	1	30	0	0	9	0	0	9	0	2	0	0	0	0	0	0	0	0	0	0	0	0	0	0	0	0	0	0	0	0	0	0	0	0	0	0	0	0
Otu0336	0	0	0	0	0	0	0	0	0	0	0	0	0	0	0	0	0	0	0	0	0	2	0	1	1	2	2	0	0	1	4	0	0	0	0	0	1	0	2	0	2	0	0	0	0	0	1	2	0
Otu0337	0	0	0	0	0	0	0	0	0	0	0	0	0	0	0	0	0	0	0	0	0	1	1	0	0	1	0	0	0	0	0	0	0	0	0	0	0	0	0	0	0	0	0	0	0	0	0	0	0
Otu0338	0	0	0	0	0	0	0	0	0	0	0	0	81	0	0	0	0	0	8	0	0	0	0	0	0	0	0	0	0	0	0	0	0	0	0	0	0	0	0	0	0	0	0	0	0	0	0	0	0
Otu0339	0	0	0	0	0	0	0	0	0	0	0	0	0	0	0	0	0	0	0	0	0	0	0	6	0	0	3	0	0	0	0	3	0	0	0	0	0	0	1	0	0	0	0	0	0	1	6	0	0
Otu0340	0	21	0	2	0	0	0	0	0	0	0	0	0	63	0	0	3	0	0	0	0	0	0	0	0	0	0	0	0	0	0	0	0	0	0	0	0	0	0	0	0	0	0	0	0	0	0	0	0
Otu0341	0	0	0	0	0	0	0	0	0	0	0	0	0	0	0	0	0	0	0	0	0	0	0	0	0	1	0	0	0	0	0	0	0	0	3	0	59	0	0	0	1	9	0	15	0	0	0	0	0
Otu0342	0	0	0	0	0	0	0	0	0	0	0	0	0	0	0	0	0	0	0	0	0	12	4	6	1	3	2	0	2	1	14	1	10	2	1	0	1	6	2	9	0	1	0	0	0	0	1	0	0
Otu0343	0	87	0	0	0	0	0	0	0	0	0	0	0	0	0	0	0	0	0	0	0	0	0	0	0	0	0	0	0	0	0	0	0	0	0	0	0	0	0	0	0	0	0	0	0	0	0	0	0
Otu0344	0	0	0	0	0	0	0	0	0	0	0	0	0	0	0	0	0	0	0	0	0	0	0	0	0	0	0	0	0	0	0	0	0	0	0	0	0	0	0	0	0	0	0	0	4	0	0	0	0
Otu0345	0	0	0	0	0	0	20	0	0	0	0	0	55	0	0	0	0	0	11	0	0	0	0	0	0	0	0	0	0	0	0	0	0	0	0	0	0	0	0	0	0	0	0	0	0	0	0	0	0
Otu0346	0	0	0	0	0	0	0	0	0	81	0	0	0	0	0	0	0	0	0	0	0	0	0	0	0	0	0	0	0	0	0	2	0	0	0	0	0	0	0	0	0	0	0	0	3	0	0	0	0
Otu0347	0	0	0	0	0	0	0	0	0	7	0	0	0	0	0	0	0	0	2	3	0	0	0	0	0	0	0	0	0	0	2	0	0	0	0	0	0	0	0	0	0	0	0	0	0	0	0	0	0
Otu0348	0	0	0	0	0	0	4	0	0	0	0	0	50	0	0	0	0	0	31	0	0	0	0	0	0	0	0	0	0	0	0	0	0	0	0	0	0	0	0	0	0	0	0	0	0	0	0	0	0
Otu0349	2	0	0	0	0	0	7	0	3	0	47	0	0	18	0	0	8	0	0	0	0	0	0	0	0	0	0	0	0	0	0	0	0	0	0	0	0	0	0	0	0	0	0	0	0	0	0	0	0
Otu0350	1	0	0	1	2	0	4	0	0	6	0	0	43	19	0	0	8	0	0	0	0	0	0	0	0	0	0	0	0	0	0	0	0	0	0	0	0	0	0	0	0	0	0	0	0	0	0	0	0
Otu0351	0	0	0	0	0	0	0	0	0	0	0	0	0	0	0	0	0	0	0	0	0	0	0	0	0	0	0	0	0	0	0	0	0	0	0	0	0	0	0	84	0	0	0	0	0	0	0	0	0
Otu0352	0	0	0	0	0	0	0	0	0	0	0	1	0	0	0	0	0	0	0	0	1	0	0	2	0	3	2	0	0	0	0	0	0	0	0	1	0	0	0	8	0	0	0	0	7	6	0	2	0
Otu0353	0	0	0	0	0	0	0	0	0	0	0	0	0	0	0	0	0	0	0	0	0	0	0	0	0	0	0	0	0	0	0	0	5	0	0	0	0	0	0	0	0	0	0	0	0	37	0	10	0
Otu0354	0	0	0	0	0	0	0	0	0	0	0	0	0	0	0	0	0	0	0	0	0	0	1	0	3	0	0	0	0	0	0	0	0	0	0	0	0	0	0	0	0	0	0	0	0	0	0	0	0
Otu0355	3	11	1	10	0	5	3	2	0	3	9	0	27	0	0	0	1	0	7	0	0	0	0	0	0	0	0	0	0	0	0	0	0	0	0	0	0	0	0	0	0	0	0	0	0	0	0	0	0
Otu0356	0	0	0	0	0	0	0	0	0	0	0	0	0	0	0	0	0	0	0	0	0	0	2	2	0	4	2	0	2	0	3	0	5	0	1	0	0	4	0	7	0	2	0	0	2	0	1	0	0
Otu0357	0	0	0	0	0	0	82	0	0	0	0	0	0	0	0	0	0	0	0	0	0	0	0	0	0	0	0	0	0	0	0	0	0	0	0	0	0	0	0	0	0	0	0	0	0	0	0	0	0
Otu0358	0	0	43	0	0	11	0	0	10	0	0	6	0	0	2	0	0	2	0	0	7	0	0	0	0	0	0	0	0	0	0	0	0	0	0	0	0	0	0	0	0	0	0	0	0	0	0	0	0
Otu0359	0	0	0	0	0	0	0	0	0	0	0	0	0	0	0	0	0	0	0	2	0	0	0	0	0	0	0	0	0	0	0	0	3	0	0	0	0	0	0	0	0	0	5	0	0	0	0	0	0
Otu0360	1	0	0	8	0	0	2	0	0	0	0	0	0	0	0	7	4	0	4	0	0	0	0	0	0	0	0	0	0	0	0	0	0	0	0	0	0	0	0	0	0	0	0	0	0	0	0	0	0
Otu0361	0	0	0	0	0	0	0	0	0	0	0	0	0	0	0	0	0	0	0	0	0	0	0	1	0	0	0	0	0	0	0	0	0	0	0	0	0	0	0	0	0	0	1	4	0	0	4	1	1
Otu0362	0	39	2	0	2	0	0	0	0	1	0	0	0	9	0	2	0	0	15	6	0	0	0	0	0	0	0	0	0	0	0	0	0	0	0	0	0	0	0	0	0	0	0	0	0	0	0	0	0
Otu0363	0	0	0	0	0	0	0	0	0	0	0	0	0	0	0	0	0	0	0	0	0	0	0	1	0	0	0	0	0	0	0	0	0	0	0	0	0	1	1	0	0	0	13	7	0	1	8	2	2
Otu0364	0	0	0	0	0	0	0	0	0	0	0	0	0	0	0	0	0	0	0	0	0	27	4	5	8	0	0	0	3	2	0	0	0	1	0	0	4	0	2	3	4	4	11	0	0	0	0	0	0
Otu0365	0	0	0	0	0	0	0	0	0	0	0	0	0	0	0	0	0	0	0	0	0	1	0	0	0	0	0	2	1	6	0	0	0	0	43	0	0	0	25	0	0	0	0	0	0	0	0	0	0
Otu0366	0	0	0	0	0	0	0	0	0	0	0	0	0	0	0	76	0	0	0	0	0	0	0	0	1	0	0	1	0	0	0	0	0	0	0	0	0	0	0	0	0	0	0	0	0	0	0	0	0
Otu0367	0	0	0	0	0	0	0	0	0	0	0	0	0	0	0	0	0	0	0	0	0	5	2	0	3	3	3	0	1	2	2	1	1	1	0	0	0	2	0	2	1	1	6	5	1	0	2	0	0
Otu0368	3	0	0	3	0	0	0	6	0	0	0	1	0	59	0	3	0	0	0	1	1	0	0	0	0	0	0	0	0	0	0	0	0	0	0	0	0	0	0	0	0	0	0	0	0	0	0	0	0
Otu0369	0	0	0	0	0	0	0	0	0	0	0	0	0	0	0	0	0	0	0	0	0	0	1	0	0	1	0	0	0	0	1	1	0	0	0	0	0	0	0	2	0	0	10	0	1	0	2	0	0
Otu0370	0	0	0	0	0	0	0	0	0	0	0	0	0	0	0	0	0	2	0	0	0	0	0	0	0	0	0	0	0	8	0	0	0	0	14	21	0	0	0	0	0	28	0	0	0	1	0	0	0
Otu0371	0	0	0	0	0	0	0	0	0	0	0	0	0	0	0	0	0	0	0	0	0	0	0	0	0	0	0	0	1	0	0	0	2	0	0	0	0	0	0	0	0	0	0	0	0	3	0	0	2
Otu0372	0	0	0	0	0	0	0	0	0	0	0	0	0	0	0	0	0	0	0	0	0	0	0	0	0	0	0	0	0	0	0	0	0	0	0	0	0	0	0	0	0	0	45	30	0	0	0	0	0
Otu0373	0	0	0	0	0	0	0	0	0	0	0	0	0	0	0	0	0	0	0	0	0	7	5	0	17	0	0	8	1	6	0	2	0	0	3	12	1	0	8	1	1	1	0	0	0	0	0	0	0
Otu0374	0	0	0	0	0	0	0	0	0	0	0	0	0	0	0	0	0	0	0	0	0	0	3	1	1	4	4	0	13	1	2	23	0	0	10	1	3	0	2	2	0	1	0	0	0	0	0	0	0
Otu0375	0	5	0	0	1	0	0	2	0	1	1	0	0	2	0	4	3	0	2	0	0	0	0	1	0	0	0	0	0	0	0	1	0	0	0	0	0	0	0	2	2	0	0	0	0	0	0	0	1
Otu0376	0	0	0	0	0	0	0	0	2	0	0	9	0	0	5	0	0	1	0	0	0	0	0	0	0	0	0	1	1	0	0	0	0	0	0	0	0	0	0	9	0	0	0	0	0	0	1	0	2
Otu0377	0	0	0	0	0	0	0	0	0	0	0	0	0	0	0	0	0	0	0	0	0	1	0	1	1	0	0	0	0	0	0	0	0	0	0	0	2	1	0	24	43	0	0	0	0	0	0	0	0
Otu0378	0	0	0	0	0	0	0	0	0	0	0	0	0	0	0	0	0	0	0	0	0	0	0	0	0	0	0	0	0	0	0	0	0	0	0	0	0	0	0	0	0	0	0	0	0	0	0	0	0
Otu0379	0	0	0	4	0	0	0	0	0	0	0	0	69	0	0	0	0	0	0	0	0	0	0	0	0	0	0	0	0	0	0	0	0	0	0	0	0	0	0	0	0	0	0	0	0	0	0	0	0
Otu0380	0	0	0	0	0	0	0	0	0	0	0	0	0	0	0	0	0	0	0	0	0	4	1	3	2	2	4	1	3	0	0	1	9	4	1	0	0	6	0	2	0	1	1	2	0	2	2	0	1
Otu0381	0	0	0	0	0	0	0	0	0	0	0	0	0	0	0	0	0	0	0	0	0	4	0	4	0	0	0	1	0	0	0	0	0	0	0	0	1	2	2	51	5	0	0	0	0	0	0	0	0
Otu0382	0	0	0	0	0	0	0	0	0	0	0	0	0	0	0	0	0	0	0	0	0	3	2	3	0	2	0	0	0	0	2	2	1	0	0	0	0	0	0	2	2	0	10	0	0	0	0	0	1
Otu0383	0	0	0	0	0	0	0	0	2	0	0	1	46	0	0	0	0	4	0	0	11	0	2	0	1	0	0	1	0	0	0	2	0	0	0	0	0	0	0	0	0	0	0	0	0	0	0	0	0
Otu0384	0	70	0	0	0	0	0	0	0	0	0	0	0	0	0	0	0	0	0	0	0	0	0	0	0	0	0	0	0	0	0	0	0	0	0	0	0	0	0	0	0	0	0	0	0	0	0	0	0
Otu0385	0	0	0	0	0	0	0	0	0	0	0	0	0	0	0	0	0	0	0	0	0	1	1	0	1	0	0	0	0	0	0	0	0	0	0	0	0	0	2	43	0	0	0	0	0	0	0	0	0
Otu0386	0	0	0	3	0	0	0	0	0	6	0	0	0	0	0	0	0	0	0	4	0	0	0	0	0	0	0	0	0	0	0	0	0	54	2	0	0	0	0	0	0	0	0	0	0	0	0	0	0
Otu0387	0	0	0	2	9	0	21	13	0	5	10	0	0	0	0	0	8	0	0	0	0	0	0	0	0	0	0	0	0	0	0	0	0	0	0	0	0	0	0	0	0	0	0	0	0	0	0	0	0
Otu0388	0	0	0	0	0	0	0	0	0	0	0	0	0	0	0	0	0	0	0	0	0	0	0	0	0	0	0	0	0	0	0	0	0	0	0	0	0	0	0	0	0	0	0	0	0	0	0	0	0
Otu0389	5	0	0	0	0	0	0	0	0	0	0	0	0	0	0	0	0	0	0	0	0	2	0	0	0	2	3	0	0	0	3	0	1	0	0	2	0	0	0	0	2	0	0	0	1	0	0	0	0
Otu0390	0	0	0	0	0	17	0	0	4	0	0	0	0	0	5	0	0	0	0	0	1	0	0	0	0	0	0	0	0	0	0	0	0	0	0	0	0	0	26	0	0	0	0	0	0	0	0	0	0
Otu0391	0	0	0	9	0	0	0	0	0	0	0	0	0	0	3	5	0	0	0	0	0	0	4	3	7	0	0	1	9	1	0	1	1	0	0	1	0	0	0	8	4	0	0	0	0	0	4	0	0
Otu0392	0	0	0	0	0	0	0	0	0	0	0	0	0	0	0	0	0	0	0	0	0	0	0	0	0	0	0	0	0	0	0	0	0	0	0	0	0	0	0	0	0	0	0	0	0	0	0	0	0
Otu0393	0	30	0	0	4	0	0	0	0	0	0	0	0	0	0	0	8	0	0	0	0	0	0	0	0	0	0	0	0	0	0	0	0	0	0	0	0	0	0	0	0	0	4	0	0	0	0	0	0
Otu0394	0	0	0	0	0	0	0	0	0	0	0	0	0	0	0	0	0	0	0	0	0	0	0	0	0	0	0	0	0	0	0	0	0	0	0	0	0	0	0	0	0	0	0	0	0	0	0	0	0
Otu0395	0	0	0	0	0	0	0	0	0	67	0	0	0	0	0	0	0	0	0	0	0	0	0	0	0	0	0	0	0	0	0	0	0	0	0	0	0	0	0	0	0	0	0	0	0	0	0	0	0
Otu0396	0	0	0	0	0	0	0	0	0	10	52	0	0	0	0	0	0	0	0	0	0	0	0	0	0	0	0	0	0	0	0	0	0	0	0	0	0	0	0	0	0	0	0	0	0	0	0	0	0
Otu0397	0	0	0	0	0	0	0	0	0	0	0	0	0	0	0	0	0	0	0	0	0	0	0	0	0	0	0	0	0	0	1	0	0	0	0	0	0	0	0	0	0	0	10	0	0	0	0	0	0
Otu0398	0	0	0	0	0	0	0	0	0	0	0	0	0	0	0	0	0	0	0	0	2	0	0	1	0	0	0	0	0	1	0	0	0	5	1	10	0	0	0	0	0	2	2	0	0	0	0	0	8
Otu0399	0	0	0	0	0	0	56	0	0	0	0	0	0	0	0	0	0	0	0	0	0	0	0	0	0	0	0	0	0	0	0	2	0	0	0	0	0	0	0	1	0	0	0	0	0	0	0	0	0
Otu0400	0	0	0	0	0	0	11	0	0	0	0	0	0	0	0	0	0	0	0	0	0	0	0	0	0	0	0	0	0	0	0	0	0	0	0	0	0	0	0	0	0	0	0	0	0	0	0	0	0
Otu0401	0	0	0	0	0	0	0	0	0	0	0	0	0	0	0	0	0	0	0	0	0	0	0	0	0	0	0	0	0	0	0	0	0	0	0	0	0	0	0	0	0	0	0	0	0	0	0	0	0
Otu0402	0	22	0	0	0	0	43	0	0	0	0	0	0	0	0	0	0	0	0	0	0	0	0	0	0	0	0	0	0	0	0	0	0	0	0	0	0	0	0	0	0	0	0	0	0	0	0	0	0
Otu0403	2	0	0	0	0	0	0	24	0	0	36	0	0	0	0	2	0	1	0	0	0	0	0	0	0	0	0	0	0	0	0	0	0	0	0	0	0	0	0	0	0	0	0	0	0	0	0	0	0
Otu0404	0	0	0	0	0	0	0	0	0	0	0	0	0	0	0	0	0	0	0	0	0	0	0	0	0	0	0	0	0	0	0	0	0	0	0	0	0	0	0	0	0	0	0	0	0	0	0	0	0
Otu0405	0	0	0	0	0	0	0	0	0	0	0	0	0	0	0	0	0	0	0	0	0	0	0	0	0	0	0	0	0	0	0	0	0	0	0	0	0	0	0	0	0	0	0	1	2	2	3	0	2
Otu0406	0	0	0	0	0	0	0	0	0	0	0	0	0	0	0	0	0	0	0	0	0	0	0	0	0	0	0	0	0	0	0	55	0	3	0	0	0	0	0	5	0	0	0	0	0	0	0	0	0
Otu0407	0	0	0	0	0	0	0	0	0	0	0	0	0	0	0	0	0	0	0	0	0	0	63	0	0	0	0	0	0	0	0	0	0	0	0	0	0	0	0	0	0	0	0	0	0	0	0	0	0
Otu0408	0	0	0	0	0	0	0	0	0	0	0	0	0	0	0	0	0	0	0	0	0	0	0	0	0	0	0	0	0	0	0	0	0	0	0	0	0	0	0	0	0	0	0	0	0	0	0	0	0
Otu0409	0	41	0	0	0	0	0	0	0	0	0	0	0	0	0	5	0	0	0	0	0	0	1	0	0	0	0	1	0	1	0	0	0	0	1	0	0	2	5	2	4	0	0	0	0	0	0	0	0
Otu0410	0	0	0	0	0	0	0	0	0	3	0	0	0	0	0	0	0	0	0	0	0	0	2	0	0	0	0	0	4	0	0	1	1	0	1	2	0	0	4	0	22	0	0	0	0	0	0	0	0
Otu0411	0	51	0	0	0	0	0	0	0	4	0	0	0	0	0	1	6	0	0	0	0	0	0	0	0	0	0	0	0	0	0	0	0	0	0	0	0	0	0	0	0	0	0	0	0	0	0	0	0
Otu0412	0	0	0	0	0	0	0	0	0	0	0	0	0	0	0	0	0	0	0	0	0	0	1	0	2	0	1	4	3	3	0	0	0	0	18	2	0	19	5	0	0	1	0	0	2	0	0	0	0
Otu0413	0	0	0	0	2	0	0	0	0	0	0	0	0	0	0	0	19	0	0	0	0	0	0	0	0	2	0	0	0	3	0	0	0	0	28	0	0	0	2	0	0	5	0	0	0	0	0	0	0
Otu0414	0	0	0	0	0	0	0	0	0	61	0	0	0	0	0	0	0	0	0	0	0	0	0	0	0	0	0	0	0	1	0	0	0	0	0	0	0	0	0	0	0	0	0	0	0	0	0	0	0
Otu0415	0	0	0	0	0	0	0	0	0	0	0	0	0	0	0	0	0	0	0	0	0	0	0	3	0	1	0	0	0	0	0	0	1	0	0	0	0	0	0	0	0	0	6	1	2	0	8	0	0
Otu0416	0	0	0	0	0	0	0	0	0	0	0	0	0	0	0	0	0	0	0	0	0	0	0	0	0	0	0	0	0	0	0	0	0	0	0	0	0	0	0	0	0	0	0	0	0	0	0	0	0
Otu0417	0	61	0	0	0	0	0	0	0	0	0	0	0	0	0	0	0	0	0	0	0	0	0	0	0	0	0	0	0	0	0	0	0	0	0	0	0	0	0	0	0	0	0	0	0	0	0	0	0
Otu0418	0	0	0	0	0	11	0	0	0	0	15	0	0	0	0	0	0	0	0	0	2	0	0	0	5	0	0	0	0	0	0	2	1	0	3	0	1	6	4	8	0	0	0	0	0	0	0	0	0
Otu0419	0	0	0	0	0	0	0	0	0	0	0	0	61	0	0	0	0	0	0	0	0	0	0	0	0	0	0	0	0	0	0	0	0	0	0	0	0	0	0	0	0	0	0	0	0	0	0	0	0
Otu0420	0	0	0	0	0	0	0	0	0	0	0	0	0	0	0	0	0	0	0	0	0	0	0	0	0	0	0	0	0	0	0	0	0	0	0	0	0	0	0	0	0	0	0	0	0	0	0	0	0
Otu0421	0	0	0	0	0	0	0	0	0	0	0	0	0	0	0	0	0	0	0	0	0	0	0	0	0	0	0	0	1	0	0	1	0	0	0	0	0	0	0	0	0	0	0	1	1	1	5	0	2
Otu0422	0	0	0	0	0	0	7	34	0	0	15	0	0	0	0	0	0	0	0	0	2	2	0	0	0	0	0	0	0	0	0	0	0	0	0	0	0	0	0	0	0	0	0	0	0	0	0	0	0
Otu0423	2	0	1	2	0	0	2	1	0	0	6	0	20	0	0	0	0	0	0	0	0	0	0	0	0	0	0	0	0	0	0	0	0	0	0	0	0	0	0	0	0	0	0	0	0	0	1	0	0
Otu0424	0	0	0	0	0	0	0	0	0	0	0	0	0	0	0	0	60	0	0	0	0	0	0	0	0	0	0	0	0	0	0	0	0	0	0	0	0	0	0	0	0	0	0	0	0	0	0	0	0
Otu0425	0	0	0	0	0	2	0	0	0	0	0	0	0	0	0	0	0	0	0	0	0	1	0	0	8	0	0	0	0	0	1	1	0	0	0	0	0	2	0	12	0	0	0	1	0	0	0	0	0
Otu0426	0	0	0	8	0	0	7	5	0	0	0	0	33	0	0	2	0	0	0	4	0	0	0	0	0	0	0	0	0	0	0	0	0	0	0	0	0	0	0	0	0	0	0	0	0	0	0	0	0
Otu0427	0	0	0	0	6	0	0	0	0	0	33	0	0	13	0	0	2	0	0	5	0	0	0	0	0	0	0	0	0	0	0	0	0	0	0	0	0	0	0	0	0	0	0	0	0	0	0	0	0
Otu0428	0	0	0	0	0	0	0	0	0	25	0	0	0	0	0	0	0	0	0	0	0	0	0	0	0	0	0	0	0	0	0	0	0	0	0	0	0	0	0	0	0	0	0	0	0	0	0	0	0
Otu0429	0	0	0	0	0	0	0	0	0	0	58	0	0	0	0	0	0	0	0	0	0	0	0	0	0	0	0	0	0	0	0	0	0	0	0	0	0	0	0	0	0	0	0	0	0	0	0	0	0
Otu0430	0	0	0	0	0	0	0	0	0	58	0	0	0	0	0	0	0	0	0	0	0	0	0	0	0	0	0	0	0	0	0	0	0	0	0	0	0	0	0	0	0	0	0	0	0	0	0	0	0
Otu0431	0	0	0	2	0	0	0	21	0	0	0	0	35	0	0	0	0	0	0	0	0	0	0	0	0	0	0	0	0	0	0	0	0	0	0	0	0	0	0	0	0	0	0	0	0	0	0	0	0
Otu0432	2	3	0	4	0	0	3	9	0	1	5	0	21	8	0	1	0	0	1	0	0	0	0	0	0	0	0	0	0	0	0	0	0	0	0	0	0	0	0	0	0	0	0	0	0	0	0	0	0
Otu0433	0	0	0	0	0	0	0	0	0	54	0	0	0	0	0	0	0	0	0	0	0	0	0	0	0	0	0	0	0	0	0	2	0	0	0	0	1	0	0	0	0	0	0	0	0	0	0	0	0
Otu0434	0	0	0	0	0	0	0	0	0	0	0	0	0	0	0	0	0	0	0	0	0	0	0	0	0	0	0	0	0	0	0	0	0	0	1	0	0	0	0	0	0	0	0	0	2	0	3	0	0
Otu0435	0	0	0	0	0	0	0	0	0	0	0	0	0	0	0	0	0	0	0	0	0	0	0	0	0	0	0	0	0	0	0	0	0	1	0	0	0	0	0	0	0	1	0	0	0	0	2	0	0
Otu0436	0	0	0	0	0	0	0	0	0	0	0	0	0	0	0	0	0	0	0	0	0	0	0	0	0	0	0	0	0	0	0	0	0	0	0	0	0	0	0	0	0	0	0	0	0	0	0	0	0
Otu0437	0	0	0	0	0	0	0	0	0	0	0	0	0	0	0	2	0	0	0	0	0	0	0	0	0	0	0	0	0	0	0	0	0	0	0	0	0	0	0	0	0	0	0	0	0	0	0	0	0
Otu0438	0	0	0	0	0	0	0	0	0	0	0	0	0	0	0	0	0	0	0	0	0	0	0	0	0	0	0	0	0	0	0	0	0	0	0	0	0	0	0	0	0	0	0	0	0	0	0	0	0
Otu0439	2	0	0	0	7	11	0	0	0	0	17	0	0	10	0	0	0	0	0	0	0	0	1	0	0	0	0	0	0	0	1	0	0	0	0	0	0	0	0	0	0	0	0	0	2	0	0	0	0
Otu0440	0	0	0	0	0	0	0	0	0	0	0	0	0	0	0	0	0	0	0	0	0	0	0	0	0	0	0	0	0	0	0	0	0	0	0	0	0	0	0	0	0	0	0	0	0	0	0	0	0
Otu0441	0	41	0	0	0	0	10	0	0	0	0	0	0	0	0	5	0	0	0	0	0	0	0	0	0	0	0	0	0	0	0	0	0	0	0	0	0	0	0	0	0	0	0	0	0	0	0	0	0
Otu0442	0	0	1	0	0	7	0	0	0	0	33	6	0	0	2	0	0	0	0	0	2	0	0	0	0	0	0	0	0	0	0	3	0	0	0	0	0	0	0	0	0	0	0	0	0	0	0	0	0
Otu0443	0	0	0	0	0	0	0	0	0	0	0	0	0	0	0	0	0	0	0	0	0	0	0	0	0	0	0	0	0	0	0	0	0	0	0	0	0	0	0	0	0	0	10	2	0	2	0	0	2
Otu0444	0	11	0	13	0	0	0	4	1	2	24	0	0	0	0	0	0	0	0	0	0	0	0	0	0	0	0	0	0	0	0	0	0	0	0	0	0	0	0	0	0	0	0	0	0	0	0	0	0
Otu0445	0	0	0	0	0	0	0	0	0	52	0	0	3	0	0	0	0	0	0	0	0	0	0	0	0	0	0	0	0	0	0	0	0	0	0	0	0	0	0	0	0	0	0	0	0	0	0	0	0
Otu0446	0	0	0	0	0	0	0	0	0	0	0	0	55	0	0	0	0	0	0	0	0	0	0	0	0	0	0	0	0	0	0	0	0	0	0	0	0	0	0	0	0	0	0	0	0	0	0	0	0
Otu0447	0	0	0	0	0	0	0	0	0	0	0	0	0	0	0	0	0	0	0	0	0	0	0	0	0	0	0	0	0	0	0	0	0	0	0	0	0	0	0	0	0	0	0	0	0	0	0	0	0
Otu0448	0	0	0	0	0	0	0	0	0	0	0	0	0	0	0	2	0	1	0	0	0	0	1	0	0	0	0	0	3	0	0	0	0	0	0	0	0	0	0	0	0	0	0	31	0	0	13	0	0
Otu0449	0	0	0	0	0	0	0	0	0	0	0	0	0	0	0	0	0	0	0	0	0	7	4	2	1	2	2	1	0	1	0	3	0	0	1	0	0	2	1	6	0	0	0	0	0	0	0	0	0
Otu0450	0	0	0	0	0	0	0	0	0	0	0	0	0	0	0	0	0	0	0	0	0	0	0	2	0	1	0	0	0	0	0	0	0	0	1	0	0	0	0	0	0	0	6	0	0	0	0	0	2
Otu0451	0	0	0	0	0	0	0	0	0	0	0	0	0	0	0	0	0	0	0	0	0	2	2	0	2	0	0	0	0	0	0	0	0	0	21	0	0	0	0	0	0	1	0	0	0	0	22	0	0
Otu0452	0	0	0	0	0	0	0	0	0	0	0	0	0	0	0	0	0	0	0	0	0	0	0	0	0	0	0	0	0	0	0	0	0	0	0	0	0	0	0	0	0	0	0	0	1	0	0	0	0
Otu0453	0	0	0	3	0	0	0	31	0	0	16	0	0	0	0	0	0	0	0	0	0	0	0	0	0	0	0	0	0	0	0	0	0	0	0	0	0	0	0	0	0	0	0	0	0	0	0	0	0
Otu0454	0	0	0	0	0	0	0	0	0	0	0	0	0	0	0	0	0	0	0	0	0	0	0	0	0	3	0	50	0	0	0	0	1	0	0	0	0	0	0	0	0	0	0	0	0	0	0	0	0
Otu0455	0	0	0	0	0	0	0	0	0	0	0	0	0	0	0	0	0	0	0	0	0	0	0	0	0	0	0	0	0	0	0	0	0	0	0	0	0	0	0	0	0	0	0	0	1	0	0	0	0
Otu0456	0	0	0	0	0	0	0	0	0	0	0	0	0	0	0	0	0	0	0	0	0	0	0	0	0	0	0	0	0	0	0	0	0	0	0	0	0	0	0	0	0	0	13	0	0	0	2	0	2
Otu0457	0	0	0	1	0	0	10	0	0	0	0	0	0	0	0	0	0	0	0	0	2	0	0	0	0	0	0	0	0	0	0	0	0	0	0	0	0	0	0	0	0	0	0	0	0	0	0	0	0
Otu0458	0	0	0	0	0	0	0	0	0	0	0	0	0	0	0	0	0	0	0	0	0	4	5	0	2	1	5	1	14	0	5	3	3	0	4	2	0	0	0	0	0	1	0	0	0	0	0	0	0
Otu0459	0	41	0	0	0	0	0	0	0	0	0	0	0	11	0	0	0	0	0	0	0	0	0	0	0	0	0	0	0	0	0	0	0	0	0	0	0	0	0	0	0	0	0	0	0	0	0	0	0
Otu0460	0	0	0	0	0	0	0	0	0	0	0	0	0	0	0	0	0	0	0	0	0	0	0	0	0	0	0	0	51	0	0	0	0	0	0	0	0	0	0	1	0	0	0	0	0	0	0	0	0
Otu0461	0	0	0	0	0	0	0	0	0	0	0	0	51	0	0	0	0	0	0	0	0	0	0	0	0	0	0	0	0	0	0	0	0	0	0	0	0	0	0	0	0	0	0	0	0	0	0	0	0
Otu0462	0	0	0	0	0	0	0	0	0	0	0	0	0	0	0	0	0	0	0	0	0	0	0	0	0	0	0	0	0	0	0	0	0	0	0	0	0	0	0	0	0	0	0	0	0	0	0	0	0
Otu0463	0	0	0	0	0	0	0	0	0	0	0	0	0	0	0	0	0	0	0	0	0	0	0	0	0	0	0	0	0	0	0	0	0	0	0	0	0	0	0	0	0	0	0	0	0	0	0	0	0
Otu0464	0	0	0	0	0	0	0	0	0	0	0	0	47	0	0	4	0	0	0	0	0	0	0	0	0	0	0	0	0	0	0	0	0	0	0	0	0	0	0	0	0	0	0	0	0	0	0	0	0
Otu0465	0	0	0	0	0	0	0	0	0	0	0	0	0	0	0	0	0	0	0	0	0	0	0	0	0	0	0	0	0	0	0	0	0	0	0	0	0	0	0	0	0	0	0	0	0	0	0	0	0
Otu0466	0	4	0	0	0	0	0	0	0	0	0	0	0	0	0	0	0	0	0	0	0	6	0	0	3	0	0	0	3	1	0	3	0	0	2	1	1	9	1	2	4	1	0	0	0	0	0	0	0
Otu0467	0	0	0	0	0	0	0	0	0	0	0	0	0	0	0	4	0	0	0	0	0	0	0	1	1	0	0	0	1	2	0	0	0	0	1	1	2	0	2	10	5	0	0	0	0	0	0	0	0
Otu0468	0	0	0	0	0	0	0	0	0	25	0	0	0	0	0	0	0	1	0	0	0	7	1	0	0	0	0	0	0	0	0	13	1	0	1	0	0	0	0	0	0	0	0	0	0	0	0	0	0
Otu0469	0	0	0	1	0	0	0	0	0	0	0	0	0	0	0	0	0	0	0	0	0	0	0	0	0	0	0	0	0	0	0	0	0	0	0	0	0	0	0	0	0	0	0	0	0	0	0	0	0
Otu0470	0	0	0	0	0	0	0	0	0	0	0	0	0	0	0	0	0	0	0	0	0	0	0	0	0	0	0	0	0	0	0	0	0	0	0	0	0	0	0	0	0	0	0	6	1	0	0	0	0
Otu0471	0	0	0	0	0	0	0	0	0	0	0	0	0	0	0	0	0	0	0	0	0	0	0	0	0	0	0	0	0	0	0	50	0	0	0	0	0	0	0	0	0	0	0	0	0	0	0	0	0
Otu0472	0	0	0	0	0	0	0	0	0	0	0	0	0	0	0	0	0	0	0	0	0	0	0	0	0	0	0	0	0	0	0	0	0	0	0	0	0	0	0	0	0	0	0	0	0	0	50	0	0
Otu0473	1	11	0	0	0	0	1	2	0	3	3	1	19	0	0	1	0	0	5	1	1	0	0	0	0	0	0	0	0	0	0	0	0	0	0	0	0	0	0	0	0	0	0	0	0	0	0	0	0
Otu0474	0	0	0	0	0	0	0	0	0	0	0	0	0	0	0	0	0	0	0	0	0	1	0	0	0	0	0	0	0	0	0	2	0	0	0	0	0	0	0	0	0	0	2	0	1	0	2	0	0
Otu0475	0	0	0	0	0	0	0	0	0	0	0	0	0	0	0	0	0	0	0	0	0	0	0	0	0	0	0	0	0	0	0	0	0	0	0	0	0	0	0	0	0	0	0	0	0	0	0	0	0
Otu0476	0	0	0	0	0	0	0	0	0	0	0	0	0	0	0	0	0	0	0	0	0	0	0	0	0	0	0	0	0	0	0	0	0	0	0	0	0	0	0	0	0	0	0	0	0	0	0	0	0
Otu0477	0	0	0	0	0	0	0	0	0	0	0	0	0	0	0	0	0	0	0	0	0	0	0	0	0	0	0	0	0	0	0	0	0	0	0	0	0	0	0	0	0	0	0	0	1	4	0	0	1
Otu0478	0	0	0	0	0	0	0	0	0	0	0	0	0	0	0	0	0	0	0	0	0	0	0	0	0	0	0	0	0	0	0	0	0	0	0	0	0	0	0	0	0	0	0	0	0	0	0	0	0
Otu0479	0	0	0	0	0	0	0	0	0	49	0	0	0	0	0	0	0	0	0	0	0	0	0	0	0	0	0	0	0	0	0	0	0	0	0	0	0	0	0	0	0	0	0	0	0	0	0	0	0
Otu0480	0	45	0	0	0	0	0	0	0	0	0	0	0	0	0	0	0	0	4	0	0	0	0	0	0	0	0	0	0	0	0	0	0	0	0	0	0	0	0	0	0	0	0	0	0	0	0	0	0
Otu0481	0	0	0	0	0	0	0	0	0	0	0	1	0	0	0	0	0	0	0	0	0	0	0	0	0	0	0	0	0	0	0	0	0	0	0	0	0	0	0	0	0	0	0	1	1	0	3	1	0
Otu0482	0	0	0	0	0	0	0	0	0	0	0	0	0	0	0	0	0	0	0	0	0	0	0	0	0	0	0	0	0	0	0	0	0	0	0	0	0	0	0	7	1	0	0	0	1	0	0	5	0
Otu0483	0	0	2	0	0	0	0	0	0	5	0	0	0	0	1	0	0	0	0	0	0	0	1	0	1	0	0	0	3	0	0	8	0	0	0	1	0	10	0	0	0	0	5	0	0	1	0	0	0
Otu0484	0	0	0	0	0	0	0	24	0	0	0	0	24	0	0	1	0	0	0	0	0	0	0	0	0	0	0	0	0	0	0	0	0	0	0	0	0	0	0	0	0	0	0	0	0	0	0	0	0
Otu0485	0	0	0	0	20	0	0	0	0	0	0	0	0	28	0	0	0	0	0	0	0	0	0	0	0	0	0	0	0	0	0	0	0	0	0	0	0	0	0	0	0	0	0	0	0	0	0	0	0
Otu0486	0	0	0	0	0	0	0	0	1	6	0	0	41	0	0	0	0	0	0	0	0	0	0	0	0	0	0	0	0	0	0	0	0	0	0	0	0	0	0	0	0	0	0	0	0	0	0	0	0
Otu0487	0	0	0	0	0	0	0	0	0	0	0	0	0	0	0	0	0	0	0	0	0	0	0	0	11	0	0	1	0	0	0	4	0	1	1	0	3	0	0	4	4	0	0	9	0	0	0	0	2
Otu0488	0	0	0	0	0	0	0	0	0	0	0	0	0	0	0	0	0	0	0	0	0	0	0	0	0	0	0	0	0	0	0	0	0	0	0	0	0	0	0	0	0	0	0	0	0	0	0	0	0
Otu0489	0	0	0	0	0	0	0	0	0	0	0	0	0	0	0	0	0	0	0	0	0	0	0	0	0	0	0	0	0	0	0	0	0	0	0	0	0	0	0	0	0	0	0	0	0	0	0	0	0
Otu0490	0	0	0	0	0	0	0	0	0	0	0	0	0	0	0	0	0	0	0	0	0	0	0	0	0	0	0	0	0	0	0	0	0	0	0	0	0	0	0	0	0	0	0	0	0	0	0	0	0
Otu0491	0	0	2	0	6	3	0	2	0	2	10	0	10	6	0	0	5	0	0	1	0	0	0	0	0	0	0	0	0	0	0	0	0	0	0	0	0	0	0	0	0	0	0	0	0	0	0	0	0
Otu0492	0	0	0	0	0	0	0	0	0	47	0	0	0	0	0	0	0	0	0	0	0	0	0	0	0	0	0	0	0	0	0	0	0	0	0	0	0	0	0	0	0	0	0	0	0	0	0	0	0
Otu0493	0	0	0	0	0	0	2	0	0	0	30	0	0	0	0	0	10	0	4	0	1	0	0	0	0	0	0	0	0	0	0	0	0	0	0	0	0	0	0	0	0	0	0	0	0	0	0	0	0
Otu0494	0	0	0	0	0	0	0	0	0	16	0	0	0	0	0	0	0	0	0	0	0	0	0	5	0	0	0	0	0	0	0	0	0	0	0	0	0	0	0	0	0	0	0	0	0	0	0	0	0
Otu0495	0	0	0	0	0	0	0	0	0	0	0	0	0	0	0	0	0	0	0	0	0	1	2	1	2	3	0	0	0	0	0	0	1	0	0	0	0	0	1	0	0	1	0	0	0	0	0	0	0
Otu0496	0	0	0	0	0	0	0	0	0	0	0	0	0	0	0	0	0	0	0	0	0	0	0	0	0	0	0	0	0	0	0	0	0	0	0	0	0	0	0	0	0	0	0	0	0	0	0	0	0
Otu0497	0	0	0	0	0	0	0	7	0	0	40	0	0	0	0	0	0	0	0	0	0	0	0	0	0	0	0	0	0	0	0	0	0	0	0	0	0	0	0	0	0	0	0	0	0	0	0	0	0
Otu0498	0	0	0	0	0	0	0	0	0	0	0	0	0	0	0	0	46	0	0	0	0	0	0	0	0	0	0	0	0	0	0	0	0	0	0	0	0	0	0	0	0	0	0	0	0	0	0	0	0
Otu0499	0	0	0	0	0	0	0	0	0	0	0	0	0	0	0	0	0	0	0	0	0	0	0	0	0	0	0	0	0	0	0	0	0	0	0	0	0	0	0	0	0	0	0	0	0	0	0	0	0
Otu0500	0	0	0	0	0	0	0	0	0	0	0	0	0	0	0	0	0	0	0	0	0	0	0	0	0	0	1	0	0	14	0	0	0	0	0	22	0	0	6	0	0	0	0	0	0	0	0	0	0
Otu0501	0	0	0	0	0	0	0	0	0	0	0	0	0	0	0	0	0	0	0	0	0	0	0	0	0	0	0	0	0	0	0	0	0	0	0	0	0	0	0	0	0	0	0	0	0	0	0	0	0
Otu0502	0	0	0	0	0	0	0	0	0	0	0	0	46	0	0	0	0	0	0	0	0	0	0	0	0	0	0	0	0	0	0	0	0	0	0	0	0	0	0	0	0	0	0	0	0	0	0	0	0
Otu0503	0	0	0	0	0	7	0	0	0	0	0	0	36	0	0	0	0	0	0	3	0	0	0	0	0	0	0	0	0	0	0	0	0	0	0	0	0	0	0	0	0	0	0	0	0	0	0	0	0
Otu0504	0	0	0	1	0	0	0	0	5	0	0	0	27	5	0	0	0	0	3	2	0	0	0	0	0	0	0	0	0	0	0	0	0	0	0	0	0	0	0	0	0	0	0	0	0	2	0	0	0
Otu0505	0	0	0	0	0	0	0	0	0	0	0	0	0	0	0	0	0	0	0	0	0	0	0	0	3	0	0	0	0	0	0	0	3	0	0	0	0	0	0	40	0	0	0	0	0	0	0	0	0
Otu0506	0	0	0	0	0	0	0	0	0	0	0	0	0	0	0	0	0	0	0	0	0	1	0	0	2	0	0	4	0	11	0	0	0	0	11	2	0	4	0	1	0	10	0	0	0	0	0	0	0
Otu0507	0	0	0	0	0	0	6	0	0	0	0	0	0	0	0	0	3	0	0	0	0	0	0	0	0	0	0	0	0	0	0	0	0	0	0	0	0	0	0	0	0	0	0	0	0	0	0	0	0
Otu0508	0	0	0	0	0	0	0	0	0	0	0	0	0	0	0	0	0	0	0	0	0	0	0	0	0	0	0	0	0	0	0	0	0	0	45	0	0	0	0	0	0	0	0	0	0	0	0	0	0
Otu0509	0	0	0	0	0	0	0	7	0	0	0	0	0	0	0	0	18	0	0	0	0	0	0	0	0	0	0	0	0	0	0	0	0	0	0	0	0	0	0	0	0	0	0	0	0	0	0	0	0
Otu0510	3	0	0	0	0	3	10	0	1	0	23	0	3	0	0	0	2	0	0	0	0	0	0	0	0	0	0	0	0	0	0	0	0	0	0	0	0	0	0	0	0	0	0	0	0	0	0	0	0
Otu0511	0	0	0	0	0	0	0	0	0	0	0	0	0	0	0	0	0	0	0	0	0	2	3	1	0	0	0	1	1	0	0	1	0	9	6	1	0	0	1	0	0	0	3	0	0	0	0	0	0
Otu0512	2	0	0	0	0	6	0	0	0	0	0	0	37	0	0	0	0	0	0	0	0	0	0	0	0	0	0	0	0	0	0	0	0	0	0	0	0	0	0	0	0	0	0	0	0	0	0	0	0
Otu0513	0	0	0	0	0	0	0	0	0	0	0	0	0	0	0	0	0	0	0	0	0	0	2	0	10	0	0	0	2	0	0	0	0	3	0	3	1	24	0	0	0	0	0	0	0	0	0	0	0
Otu0514	0	43	0	0	0	0	0	0	0	2	0	0	0	0	0	0	0	0	0	0	0	0	0	0	0	0	0	0	0	0	0	0	0	0	0	0	0	0	0	0	0	0	0	0	0	0	0	0	0
Otu0515	0	0	0	0	0	0	3	0	0	0	0	0	0	0	0	0	3	0	0	0	0	0	0	0	0	0	0	0	0	0	0	0	0	0	0	0	0	0	0	0	0	0	0	0	0	1	0	8	0
Otu0516	0	0	0	1	0	0	0	0	0	0	0	0	0	0	0	0	8	0	0	0	0	0	0	2	0	0	0	0	0	0	0	0	0	5	25	0	0	1	0	0	1	0	1	0	0	0	0	0	0
Otu0517	0	0	0	0	0	0	0	0	0	44	0	0	0	0	0	0	0	0	0	0	0	0	0	0	0	0	0	0	0	0	0	0	0	0	0	0	0	0	0	0	0	0	0	0	0	0	0	0	0
Otu0518	0	0	0	0	0	0	0	0	0	41	0	0	0	0	0	2	0	0	0	0	0	0	0	0	0	0	0	0	0	0	0	1	0	0	0	0	0	0	0	0	0	0	0	0	0	0	0	0	0
Otu0519	0	0	0	0	0	0	0	19	0	0	0	0	19	0	0	0	3	0	0	0	3	0	0	0	0	0	0	0	0	0	0	0	0	0	0	0	0	0	0	0	0	0	0	0	0	0	0	0	0
Otu0520	0	0	0	0	0	0	0	0	0	0	0	0	0	0	0	0	0	0	0	0	0	0	0	0	0	3	0	0	0	0	0	0	0	0	0	0	0	1	0	1	0	0	5	0	1	0	0	0	0
Otu0521	0	0	0	0	0	0	0	0	0	0	0	0	44	0	0	0	0	0	0	0	0	0	0	0	0	0	0	0	0	0	0	0	0	0	0	0	0	0	0	0	0	0	0	0	0	0	0	0	0
Otu0522	0	0	0	0	0	0	0	0	0	0	0	0	0	0	0	44	0	0	0	0	0	0	0	0	0	0	0	0	0	0	0	0	0	0	0	0	0	0	0	0	0	0	0	0	0	0	0	0	0
Otu0523	0	0	0	0	0	0	0	0	0	0	0	0	0	0	0	0	0	0	0	0	0	0	0	0	0	0	0	0	0	0	0	0	0	0	0	0	0	0	0	0	0	0	0	0	2	4	0	0	0
Otu0524	0	0	0	0	0	0	0	0	0	0	0	0	0	0	0	43	0	0	0	0	0	0	0	0	0	0	0	0	0	0	0	0	0	0	0	0	0	0	0	0	0	0	0	0	0	0	0	0	0
Otu0525	0	0	0	0	0	0	0	0	0	0	0	0	0	0	0	0	0	0	0	0	0	0	0	0	0	0	0	0	0	0	0	43	0	0	0	0	0	0	0	0	0	0	0	0	0	0	0	0	0
Otu0526	0	0	0	0	0	0	0	0	0	5	0	0	36	0	0	0	0	0	0	0	0	0	0	0	0	0	0	0	0	0	0	0	0	0	0	0	0	0	0	0	0	0	0	0	0	0	0	0	0
Otu0527	0	0	0	0	0	0	0	0	0	0	0	0	0	0	0	0	0	0	0	0	0	0	0	0	0	0	0	0	0	0	0	0	0	0	0	0	0	0	0	0	0	0	4	0	0	0	3	3	0
Otu0528	0	0	0	0	0	0	0	0	0	0	0	0	0	0	0	0	0	0	0	0	0	1	1	5	0	4	0	0	1	0	0	0	5	1	0	1	2	13	1	2	0	3	0	0	0	0	0	0	0
Otu0529	0	0	0	0	0	0	0	0	0	0	0	0	0	0	0	0	0	0	0	0	0	0	0	0	0	0	0	0	1	0	0	0	0	0	0	0	0	0	0	1	0	0	0	0	0	0	35	0	0
Otu0530	0	0	0	0	0	0	0	0	0	0	0	0	0	0	0	0	0	0	0	0	0	0	1	0	0	0	2	0	0	0	0	0	0	0	0	0	0	0	0	0	1	0	0	0	0	0	6	0	0
Otu0531	1	20	0	0	0	0	0	0	0	0	8	0	13	0	0	0	0	0	0	0	0	0	0	0	0	0	0	0	0	0	0	0	0	0	0	0	0	0	0	0	0	0	0	0	0	0	0	0	0
Otu0532	0	0	0	0	0	0	0	0	0	0	0	0	0	0	0	0	0	0	0	0	0	0	0	0	0	0	0	0	0	0	0	0	0	0	0	0	0	0	0	0	0	0	5	0	0	0	0	1	0
Otu0533	0	0	0	6	0	0	0	0	0	0	0	0	0	0	0	3	1	0	0	0	0	0	1	0	1	0	0	0	1	0	0	9	0	0	1	0	0	4	0	5	1	0	0	0	0	0	0	0	0
Otu0534	0	0	0	0	0	0	0	0	0	42	0	0	0	0	0	0	0	0	0	0	0	0	0	0	0	0	0	0	0	0	0	0	0	0	0	0	0	0	0	0	0	0	0	0	0	0	0	0	0
Otu0535	0	0	0	0	0	0	0	0	0	0	0	0	0	0	0	0	0	0	0	0	0	0	0	0	0	0	0	0	0	0	0	0	0	0	0	0	0	0	0	0	0	0	0	0	0	0	0	0	0
Otu0536	0	0	0	0	0	0	0	0	0	0	0	0	0	0	0	39	0	0	0	0	0	0	0	0	0	0	0	0	0	0	0	0	0	0	0	1	0	0	1	0	0	0	0	0	0	0	0	0	0
Otu0537	0	0	0	0	0	0	0	0	0	0	0	0	0	0	0	0	0	0	0	0	0	0	0	0	0	0	0	0	0	0	0	0	0	0	0	0	0	0	0	0	0	0	0	0	0	0	0	0	0
Otu0538	0	0	0	0	0	0	0	0	0	0	0	0	0	0	0	0	0	0	0	0	0	0	0	0	0	1	0	1	0	0	0	0	0	0	0	0	0	0	0	3	0	0	37	0	0	0	0	0	0
Otu0539	0	0	0	0	0	0	0	0	0	0	0	0	0	0	0	0	0	0	0	0	0	0	0	0	0	0	0	0	0	0	0	0	0	0	0	0	0	0	0	0	0	0	0	0	0	0	0	0	0
Otu0540	0	0	0	0	0	0	0	0	0	41	0	0	0	0	0	1	0	0	0	0	0	0	0	0	0	0	0	0	0	0	0	0	0	0	0	0	0	0	0	0	0	0	0	0	0	0	0	0	0
Otu0541	0	0	5	0	0	21	0	0	5	0	0	3	0	0	0	0	0	5	0	0	1	0	0	0	0	0	0	0	0	0	0	0	0	0	0	0	0	0	0	0	0	0	0	0	0	2	0	0	0
Otu0542	0	42	0	0	0	0	0	0	0	0	0	0	0	0	0	0	0	0	0	0	0	0	0	0	0	0	0	0	0	0	0	0	0	0	0	0	0	0	0	0	0	0	0	0	0	0	0	0	0
Otu0543	0	0	0	0	0	0	0	0	0	0	0	0	0	0	0	0	0	0	0	0	0	0	0	0	0	0	0	0	0	0	0	0	0	0	0	0	0	0	2	0	0	0	22	0	0	0	0	0	1
Otu0544	0	0	0	1	0	0	0	0	0	0	0	0	0	0	0	29	0	0	0	0	2	0	0	0	0	0	0	0	0	0	0	0	0	0	0	0	0	0	0	0	0	0	5	0	0	0	0	0	0
Otu0545	0	0	0	18	1	1	0	0	1	0	11	0	0	0	2	0	0	0	0	0	0	0	0	0	0	1	0	0	0	0	0	0	0	0	0	1	0	0	0	0	0	0	0	0	0	0	0	0	0
Otu0546	0	0	0	0	0	0	0	0	0	0	0	0	0	0	0	0	0	0	0	0	0	0	0	0	0	0	0	0	0	0	0	0	0	0	0	0	0	0	0	0	0	0	0	0	0	0	0	0	0
Otu0547	0	0	0	0	0	0	0	0	0	0	0	0	0	0	0	0	0	0	0	0	0	0	1	6	1	1	0	0	0	0	0	0	1	0	0	0	0	0	0	0	0	0	0	0	0	2	1	0	0
Otu0548	0	0	0	2	0	0	0	24	0	6	0	0	0	0	0	0	8	0	0	0	0	0	0	0	0	0	0	0	0	0	0	0	0	0	0	0	0	0	0	0	0	0	0	0	0	0	0	0	0
Otu0549	0	0	0	2	0	0	0	4	0	0	0	0	33	0	0	1	0	0	0	0	0	0	0	0	0	0	0	0	0	0	0	0	0	0	0	0	0	0	0	0	0	0	0	0	0	0	0	0	0
Otu0550	0	0	0	0	0	0	0	0	0	0	0	0	0	0	0	0	0	0	0	0	0	0	0	0	0	0	0	0	0	0	0	0	0	0	0	0	0	0	0	0	0	0	0	0	0	0	0	0	0
Otu0551	4	15	0	1	0	0	1	1	0	2	0	0	11	0	0	0	1	0	0	1	1	0	0	0	0	0	0	0	0	0	0	0	0	0	0	0	0	0	0	0	0	0	0	0	0	0	0	0	0
Otu0552	0	0	0	0	0	0	0	0	0	0	0	0	0	0	0	0	0	0	0	0	0	0	0	0	0	0	0	0	0	0	0	0	0	0	0	0	0	0	0	0	0	0	0	0	0	0	0	0	0
Otu0553	0	0	0	0	0	0	0	29	0	0	11	0	0	0	0	0	0	0	0	0	0	0	0	0	0	0	0	0	0	0	0	0	0	0	0	0	0	0	0	0	0	0	0	0	0	0	0	0	0
Otu0554	0	0	0	0	0	0	0	0	0	0	0	0	0	0	0	0	0	0	0	0	0	0	0	0	0	0	0	0	0	0	0	0	0	0	0	0	0	0	0	0	0	0	0	0	0	0	0	0	0
Otu0555	4	0	0	31	0	0	0	0	0	0	0	0	0	0	0	0	0	0	0	0	0	0	0	0	0	0	1	0	0	0	0	0	0	0	0	0	0	0	0	0	0	0	0	0	0	0	0	0	0
Otu0556	0	0	0	0	0	2	0	0	0	2	0	0	35	0	0	0	0	0	0	0	0	0	0	0	0	0	0	0	0	0	0	0	0	0	0	0	0	0	0	0	0	0	0	0	0	0	0	0	0
Otu0557	0	0	0	0	0	0	0	0	0	0	0	0	0	0	0	0	0	0	0	0	0	0	0	10	0	0	0	0	0	0	0	0	0	0	0	0	1	2	0	0	0	0	0	0	0	0	0	0	0
Otu0558	0	0	0	0	0	0	0	0	0	0	0	0	0	0	0	0	0	0	0	0	0	0	0	0	0	0	0	0	0	0	0	0	0	0	0	0	0	0	0	39	0	0	0	0	0	0	0	0	0
Otu0559	0	0	0	0	0	0	0	0	0	0	0	0	0	0	0	0	0	0	0	0	0	0	0	0	0	0	0	0	2	0	0	6	0	0	0	1	0	0	0	10	0	0	0	0	0	0	2	0	0
Otu0560	0	0	0	0	0	0	0	0	0	0	0	0	0	0	0	0	0	0	0	0	0	0	0	0	0	0	0	0	0	0	0	0	0	0	0	0	0	1	0	0	0	0	0	4	0	3	4	0	0
Otu0561	0	0	0	0	0	0	0	0	0	0	0	0	0	0	0	0	0	0	0	0	0	3	3	0	2	1	3	0	0	0	0	0	0	0	0	0	3	0	3	0	1	1	1	0	1	0	2	0	0
Otu0562	0	0	0	0	0	0	0	0	0	0	0	1	0	0	0	0	0	0	0	0	0	0	0	0	0	0	0	0	0	0	0	0	0	0	0	0	1	27	1	0	0	0	3	0	0	0	0	0	0
Otu0563	0	0	0	0	0	0	0	0	0	0	0	0	0	0	0	0	0	0	0	0	0	0	0	0	0	0	0	0	0	0	0	0	0	0	0	0	0	0	0	0	0	0	0	0	0	5	1	0	0
Otu0564	0	0	0	0	0	0	0	0	0	0	0	0	0	0	0	0	35	0	0	0	0	0	0	0	0	0	0	0	0	0	0	0	0	0	0	0	0	0	0	0	0	0	0	0	0	0	0	0	0
Otu0565	0	0	0	0	0	0	0	0	0	0	0	0	0	0	0	0	0	0	0	0	0	4	0	2	0	0	3	0	0	2	0	2	0	0	0	1	0	2	1	0	0	3	0	0	0	0	0	0	0
Otu0566	0	0	0	0	0	0	0	0	0	0	0	0	0	0	0	0	0	0	0	0	0	0	0	0	0	0	0	0	0	3	0	3	0	0	0	0	0	0	0	0	0	1	0	0	0	0	0	0	0
Otu0567	0	0	0	0	0	0	0	0	0	0	0	0	0	0	0	0	0	0	0	0	0	0	0	0	0	0	0	0	0	0	0	0	0	0	0	0	0	0	0	0	0	0	0	0	0	0	0	0	0
Otu0568	0	0	0	0	2	0	0	0	0	0	0	0	34	0	0	2	0	0	0	0	0	0	0	0	0	0	0	0	0	0	0	0	0	0	0	0	0	0	0	0	0	0	0	0	0	0	0	0	0
Otu0569	0	0	0	0	0	0	0	0	0	0	0	0	0	0	0	0	0	0	0	0	0	0	0	0	0	0	0	0	0	0	0	0	0	0	0	0	0	0	0	0	0	0	0	0	0	0	0	0	0
Otu0570	0	0	0	0	0	0	0	0	0	0	0	0	0	0	0	0	0	0	0	0	0	0	0	0	0	0	0	0	0	0	0	1	14	0	0	0	0	0	0	22	0	0	0	0	0	0	0	0	0
Otu0571	0	0	0	0	0	0	0	0	0	0	0	0	0	0	0	0	0	0	0	0	0	3	0	0	0	0	1	0	0	0	0	0	1	0	0	0	0	24	0	8	0	0	0	0	0	0	0	0	0
Otu0572	0	0	0	0	0	0	0	0	0	0	0	0	0	0	0	0	0	0	0	0	0	2	0	0	0	0	0	0	0	0	0	0	0	0	0	0	21	0	14	0	0	0	0	0	0	0	0	0	0
Otu0573	0	0	0	0	0	0	0	0	0	0	0	0	37	0	0	0	0	0	0	0	0	0	0	0	0	0	0	0	0	0	0	0	0	0	0	0	0	0	0	0	0	0	0	0	0	0	0	0	0
Otu0574	0	0	0	0	0	0	0	0	0	0	0	0	0	0	0	32	0	0	0	0	0	0	0	0	0	0	0	0	0	0	2	0	0	0	0	0	1	0	0	0	0	0	0	0	0	0	0	0	0
Otu0575	0	0	0	0	0	0	0	0	0	0	0	0	0	0	0	0	0	0	0	0	0	0	0	0	0	0	0	0	0	0	0	0	0	0	0	0	0	0	0	0	0	0	0	0	0	0	0	0	0
Otu0576	0	0	0	0	0	0	0	0	0	0	26	0	11	0	0	0	0	0	0	0	0	0	0	0	0	0	0	0	0	0	0	0	0	0	0	0	0	0	0	0	0	0	0	0	0	0	0	0	0
Otu0577	0	0	0	0	0	0	0	0	0	0	0	0	0	0	0	0	0	0	0	0	0	0	0	0	1	0	0	0	0	0	0	0	0	0	0	0	0	0	0	0	0	0	0	0	1	0	0	0	0
Otu0578	0	0	0	4	0	0	0	0	0	0	0	0	13	7	0	1	5	0	7	0	0	0	0	0	0	0	0	0	0	0	0	0	0	0	0	0	0	0	0	0	0	0	0	0	0	0	0	0	0
Otu0579	0	0	0	0	0	0	0	0	0	34	0	0	0	0	0	0	0	0	0	0	0	0	0	0	0	0	0	0	0	0	0	0	0	0	0	0	0	0	0	3	0	0	0	0	0	0	0	0	0
Otu0580	0	0	0	0	0	0	12	0	0	0	24	0	0	0	0	0	0	0	0	0	0	0	0	0	0	0	0	0	0	0	0	0	0	0	0	0	0	0	0	0	0	0	0	0	0	0	0	0	0
Otu0581	0	0	0	0	0	0	0	0	0	0	0	0	0	0	0	6	0	0	0	0	0	0	0	0	0	0	0	0	0	0	0	0	0	0	0	0	0	0	0	0	0	0	0	0	0	0	0	0	0
Otu0582	0	0	0	0	0	0	0	0	0	36	0	0	0	0	0	0	0	0	0	0	0	0	0	0	0	0	0	0	0	0	0	0	0	0	0	0	0	0	0	0	0	0	0	0	0	0	0	0	0
Otu0583	0	0	0	0	0	0	0	0	0	6	0	0	0	0	0	0	0	0	0	0	0	6	5	0	5	0	0	1	1	0	0	1	0	0	3	1	0	0	4	3	0	0	0	0	0	0	0	0	0
Otu0584	0	0	0	0	0	0	0	0	0	0	0	0	0	0	0	0	0	0	0	0	0	0	0	0	0	0	0	0	0	0	0	0	0	0	0	0	0	0	0	0	0	0	0	0	0	0	0	0	0
Otu0585	0	0	0	0	0	0	0	0	0	0	0	0	36	0	0	0	0	0	0	0	0	0	0	0	0	0	0	0	0	0	0	0	0	0	0	0	0	0	0	0	0	0	0	0	0	0	0	0	0
Otu0586	0	0	0	0	0	0	0	0	0	0	0	0	0	0	0	36	0	0	0	0	0	0	0	0	0	0	0	0	0	0	0	0	0	0	0	0	0	0	0	0	0	0	0	0	0	0	0	0	0
Otu0587	0	0	0	0	0	0	0	0	0	0	0	0	0	0	0	0	35	0	0	0	0	0	0	0	0	0	0	0	0	0	0	0	0	0	0	0	0	0	0	0	0	0	0	0	0	0	0	0	0
Otu0588	0	0	0	0	0	0	0	0	0	0	0	0	0	0	0	0	0	0	0	0	0	0	0	0	0	0	0	0	11	0	0	1	0	0	5	0	0	3	0	0	2	0	0	0	0	0	0	0	0
Otu0589	0	0	0	0	0	0	0	0	0	0	0	0	0	0	0	0	0	0	0	0	0	0	0	0	0	0	0	0	0	0	0	0	0	0	0	0	0	0	0	0	0	0	7	1	1	0	0	0	0
Otu0590	0	0	0	0	0	0	0	0	0	0	0	0	0	0	0	0	0	0	0	0	0	0	4	0	0	0	0	0	0	0	0	3	1	0	0	0	1	0	0	2	0	0	0	0	0	0	0	0	0
Otu0591	0	25	0	0	0	0	0	0	0	0	0	0	0	0	0	0	10	0	0	0	0	0	0	0	0	0	0	0	0	0	0	0	0	0	0	0	0	0	0	0	0	0	0	0	0	0	0	0	0
Otu0592	0	0	0	0	0	0	0	0	0	0	0	0	0	0	0	0	0	0	0	0	0	0	0	0	0	0	0	0	0	0	0	0	0	0	0	0	0	0	0	35	0	0	0	0	0	0	0	0	0
Otu0593	0	0	0	0	0	0	0	0	0	0	0	0	0	0	0	0	0	0	0	0	0	0	0	0	0	0	0	0	0	0	0	0	0	0	34	0	1	0	0	0	0	0	0	0	0	0	0	0	0
Otu0594	0	0	0	0	0	0	0	0	0	0	0	0	0	0	0	0	0	0	0	0	0	0	0	0	0	0	0	0	0	0	0	0	0	0	0	0	0	0	0	0	0	0	0	0	0	0	0	0	0
Otu0595	0	0	0	0	0	0	0	0	0	0	0	0	0	0	0	0	0	0	0	0	0	0	1	1	1	0	0	1	2	1	0	0	0	0	1	2	0	6	0	12	0	3	0	0	0	2	0	0	0
Otu0596	0	0	0	0	0	0	0	0	0	0	0	0	0	0	0	0	0	0	0	0	0	0	0	0	0	0	0	0	0	0	0	0	0	0	0	0	0	0	0	0	0	0	0	0	0	0	0	0	0
Otu0597	0	0	0	0	0	0	0	0	0	0	0	0	0	0	0	0	0	0	0	0	0	0	0	0	0	0	0	0	0	0	0	0	0	0	0	0	0	0	0	0	0	0	0	0	0	0	0	0	0
Otu0598	0	0	0	0	0	0	0	0	0	0	0	0	0	0	0	0	0	0	0	0	0	0	0	0	0	0	0	0	0	0	0	0	0	0	0	0	0	0	0	0	0	0	12	0	1	1	0	1	0
Otu0599	0	0	0	3	0	0	0	0	0	0	0	0	0	0	0	0	0	0	3	0	0	0	0	0	0	0	0	0	0	0	0	0	0	0	0	0	0	0	0	0	0	0	0	0	0	0	0	0	0
Otu0600	2	19	0	8	0	0	0	2	0	0	0	0	0	0	0	1	0	0	0	0	0	0	0	0	0	0	0	0	0	0	0	0	0	0	0	0	0	0	0	0	0	0	0	0	0	0	0	0	0
Otu0601	0	0	0	0	0	0	0	0	0	0	0	0	0	0	0	0	0	0	0	0	0	0	0	0	0	0	0	0	0	0	0	0	0	0	0	0	0	0	0	0	0	0	0	0	1	0	0	0	1
Otu0602	0	0	0	0	0	0	0	0	0	3	11	0	0	0	0	0	0	0	0	0	0	0	0	0	0	0	0	0	0	0	0	1	2	0	0	0	1	0	0	0	0	0	2	0	0	0	0	0	0
Otu0603	0	0	0	0	0	0	0	0	0	0	0	0	0	0	0	33	0	0	0	0	0	0	0	0	0	0	0	0	0	0	0	0	0	0	0	0	0	0	0	0	0	0	0	0	0	0	0	0	0
Otu0604	0	0	0	0	0	0	0	0	0	0	2	0	22	0	0	7	0	0	0	0	0	0	0	0	0	0	0	0	0	0	0	0	0	0	0	0	0	0	0	0	0	0	0	0	0	0	0	0	0
Otu0605	0	0	0	0	0	0	0	0	0	0	0	0	0	0	0	0	0	0	0	0	0	1	1	4	0	1	1	1	0	0	0	0	0	0	2	0	0	0	0	3	1	0	0	0	0	0	0	0	0
Otu0606	0	0	0	0	0	0	0	0	0	0	0	0	0	0	0	0	0	0	0	0	0	0	0	0	0	0	0	0	0	0	0	0	0	0	0	0	0	0	0	26	0	0	0	0	0	0	0	0	0
Otu0607	0	0	0	0	0	0	0	0	0	0	0	0	0	0	0	0	0	0	0	0	0	0	0	0	0	0	0	0	0	1	0	0	0	0	7	0	1	4	0	1	6	9	0	0	0	0	0	0	0
Otu0608	0	0	0	0	0	7	0	0	1	3	1	0	0	0	0	0	0	0	0	0	0	0	0	0	0	0	1	0	0	0	0	0	0	0	0	0	0	0	0	0	0	0	0	0	0	0	0	0	0
Otu0609	0	18	2	2	0	0	0	3	0	0	0	0	0	0	0	0	3	0	0	0	0	0	0	0	0	0	0	0	0	0	0	0	0	0	0	0	0	0	0	0	0	0	0	0	0	0	0	0	0
Otu0610	0	0	0	0	0	0	0	0	0	0	0	0	32	0	0	0	0	0	0	0	0	0	0	0	0	0	0	0	0	0	0	0	0	0	0	0	0	0	0	0	0	0	0	0	0	0	0	0	0
Otu0611	0	0	0	0	0	0	0	0	0	0	0	0	0	0	0	0	0	0	0	0	0	0	0	0	0	0	0	0	0	0	0	0	0	0	0	0	0	0	0	32	0	0	0	0	0	0	0	0	0
Otu0612	0	0	0	0	0	0	0	0	0	0	0	0	0	0	0	0	0	0	0	0	0	0	0	0	0	0	0	0	0	0	0	0	0	0	0	0	0	0	0	0	0	0	0	0	0	0	0	0	0
Otu0613	0	0	0	0	0	0	0	0	0	0	0	0	1	0	0	0	0	0	0	0	0	0	0	0	0	0	0	0	1	0	1	1	1	0	0	0	0	1	0	0	0	0	1	0	0	0	0	0	0
Otu0614	0	0	0	3	0	0	0	13	0	0	0	0	0	0	0	4	0	0	12	0	0	0	0	0	0	0	0	0	0	0	0	0	0	0	0	0	0	0	0	0	0	0	0	0	0	0	0	0	0
Otu0615	5	0	0	0	0	0	12	0	0	0	0	0	0	9	0	6	0	0	0	0	0	0	0	0	0	0	0	0	0	0	0	0	0	0	0	0	0	0	0	0	0	0	0	0	0	0	0	0	0
Otu0616	0	0	0	0	0	0	0	0	0	0	0	0	0	0	0	0	0	0	0	0	0	0	0	1	0	3	0	0	0	0	0	0	0	0	1	0	0	0	0	0	0	0	0	0	0	0	1	0	0
Otu0617	0	0	0	0	0	0	0	0	0	0	0	0	0	0	0	0	0	0	0	0	0	3	2	1	4	0	0	5	0	1	0	0	0	0	0	1	7	0	0	1	0	0	1	0	0	0	0	0	0
Otu0618	0	0	0	0	0	0	0	0	0	0	0	0	0	0	0	0	0	0	0	0	0	0	0	0	0	0	0	0	0	0	0	0	0	0	0	0	0	0	0	0	0	0	0	3	5	0	0	0	0
Otu0619	0	0	0	0	0	0	0	0	0	0	0	0	0	0	0	0	0	0	0	0	0	0	0	0	0	0	0	0	0	0	0	0	0	0	31	0	0	0	0	0	0	0	0	0	0	0	0	0	0
Otu0620	0	0	0	0	0	0	0	0	0	2	0	0	0	0	0	0	0	0	0	1	0	4	1	1	0	0	0	1	2	0	0	2	0	0	0	0	0	0	3	1	2	0	0	2	0	1	0	0	0
Otu0621	0	0	0	0	0	0	0	0	0	0	0	0	0	0	0	0	0	0	0	0	0	0	0	0	0	0	0	0	0	0	0	0	0	0	0	0	0	0	0	31	0	0	0	0	0	0	0	0	0
Otu0622	0	0	0	0	0	0	0	0	0	0	0	0	0	0	0	0	0	0	0	0	0	0	0	0	0	0	0	0	0	0	0	0	0	0	0	0	0	0	0	24	0	0	0	0	0	0	0	0	0
Otu0623	0	0	0	0	0	0	0	0	0	0	0	0	0	0	0	0	0	0	0	0	0	0	0	0	0	0	0	0	0	0	0	0	0	0	0	0	0	0	0	0	0	0	0	0	0	0	0	0	0
Otu0624	0	0	0	0	0	0	0	0	0	0	0	0	0	0	0	0	0	0	0	0	0	0	0	0	0	0	0	0	0	0	0	0	0	0	0	0	0	31	0	0	0	0	0	0	0	0	0	0	0
Otu0625	0	0	0	22	0	0	0	0	0	0	0	0	0	0	0	0	8	0	0	0	0	0	0	0	0	1	0	0	0	0	0	0	0	0	0	0	0	0	0	0	0	0	0	0	0	0	0	0	0
Otu0626	0	0	0	0	0	0	0	0	0	0	0	0	0	0	0	0	0	0	0	0	0	0	0	0	0	0	0	0	0	0	0	0	0	0	0	0	0	0	0	0	0	0	0	0	0	0	31	0	0
Otu0627	0	0	0	0	0	0	0	0	0	0	0	0	0	0	0	0	0	0	0	0	0	0	0	0	0	0	0	0	0	0	0	31	0	0	0	0	0	0	0	0	0	0	0	0	0	0	0	0	0
Otu0628	0	0	0	0	0	0	0	0	0	0	0	0	0	0	0	0	0	0	0	0	0	0	0	0	0	0	0	0	0	0	0	31	0	0	0	0	0	0	0	0	0	0	0	0	0	0	0	0	0
Otu0629	0	0	0	0	0	0	0	0	1	0	0	14	0	0	0	0	0	3	0	0	2	5	0	0	0	0	0	0	0	0	0	0	0	0	0	1	3	0	1	1	0	0	0	0	0	0	0	0	0
Otu0630	0	0	0	0	0	0	0	0	0	0	0	0	0	0	0	0	0	0	0	0	0	0	0	0	0	0	0	0	0	0	0	0	0	0	0	0	0	0	0	0	0	0	0	0	0	0	0	0	0
Otu0631	0	0	0	0	0	0	0	0	0	0	0	0	0	0	0	0	0	0	0	0	0	0	0	0	0	0	0	0	0	0	0	0	0	0	0	0	0	1	0	0	0	0	0	0	5	0	0	0	1
Otu0632	0	0	0	0	0	3	0	0	0	0	0	0	0	0	0	0	0	0	0	0	1	0	0	0	0	0	0	0	3	0	0	0	0	2	13	0	0	1	0	0	2	0	0	0	0	0	0	1	0
Otu0633	0	0	0	0	0	0	0	0	0	0	0	0	0	0	0	0	0	0	0	0	0	0	0	0	0	0	0	0	0	0	0	0	0	0	0	0	0	0	0	0	0	0	0	0	0	0	31	0	0
Otu0634	0	0	0	0	0	0	0	0	0	0	0	0	0	0	0	31	0	0	0	0	0	0	0	0	0	0	0	0	0	0	0	0	0	0	0	0	0	0	0	0	0	0	0	0	0	0	0	0	0
Otu0635	0	0	0	0	0	0	0	0	0	0	0	0	0	0	0	0	0	0	0	0	0	0	0	0	0	0	0	0	0	0	0	0	0	0	0	0	0	0	0	0	0	0	0	0	0	0	29	0	0
Otu0636	0	0	0	0	0	0	0	30	0	0	0	0	0	0	0	0	0	0	0	0	0	0	0	0	0	0	0	0	0	0	0	0	0	0	0	0	0	0	0	0	0	0	0	0	0	0	0	0	0
Otu0637	0	0	0	0	0	0	0	27	0	0	0	0	0	0	0	0	0	0	0	0	3	0	0	0	0	0	0	0	0	0	0	0	0	0	0	0	0	0	0	0	0	0	0	0	0	0	0	0	0
Otu0638	0	0	0	0	0	0	0	0	0	0	0	0	30	0	0	0	0	0	0	0	0	0	0	0	0	0	0	0	0	0	0	0	0	0	0	0	0	0	0	0	0	0	0	0	0	0	0	0	0
Otu0639	0	0	0	0	0	0	0	0	0	0	0	0	30	0	0	0	0	0	0	0	0	0	0	0	0	0	0	0	0	0	0	0	0	0	0	0	0	0	0	0	0	0	0	0	0	0	0	0	0
Otu0640	0	0	0	0	0	0	0	0	0	30	0	0	0	0	0	0	0	0	0	0	0	0	0	0	0	0	0	0	0	0	0	0	0	0	0	0	0	0	0	0	0	0	0	0	0	0	0	0	0
Otu0641	0	0	0	0	0	0	0	0	0	0	0	0	0	0	0	0	0	0	0	0	0	0	0	0	0	0	1	0	0	0	0	29	0	0	0	0	0	0	0	0	0	0	0	0	0	0	0	0	0
Otu0642	0	0	0	0	0	0	0	0	0	0	0	0	0	0	0	0	0	0	0	0	0	0	2	1	0	0	0	0	1	0	0	4	0	5	13	0	0	0	0	0	0	1	0	0	0	0	0	0	0
Otu0643	0	0	0	0	0	0	0	0	0	0	10	0	0	0	0	0	0	0	0	0	0	0	0	0	0	0	0	0	20	0	0	0	0	0	0	0	0	0	0	0	0	0	0	0	0	0	0	0	0
Otu0644	0	0	0	0	0	0	0	0	0	0	0	0	0	0	0	0	0	0	0	0	0	0	0	0	0	4	0	0	1	0	0	0	0	0	0	0	1	0	0	2	2	1	0	0	0	0	0	0	0
Otu0645	0	0	0	0	0	0	0	0	0	0	0	0	0	0	0	0	0	0	0	0	0	0	0	0	0	0	0	0	0	0	0	0	0	0	0	0	0	0	0	0	0	0	0	0	0	0	0	0	0
Otu0646	0	0	0	0	0	0	0	0	0	0	0	0	0	0	0	0	0	0	0	0	0	0	0	0	0	0	0	0	0	0	0	0	0	0	0	0	0	0	0	0	0	0	0	0	0	0	0	0	0
Otu0647	0	0	0	0	0	0	0	0	0	0	0	0	0	0	0	0	0	0	0	0	0	0	2	0	0	1	0	0	0	0	0	0	0	0	0	0	0	0	0	0	0	0	0	4	0	1	0	0	0
Otu0648	0	0	0	0	0	0	0	0	0	0	0	0	0	0	0	0	0	0	0	0	0	0	0	0	0	0	0	0	0	0	0	0	0	0	0	0	0	0	0	0	0	0	0	0	0	0	0	0	0
Otu0649	0	0	0	0	0	0	0	0	0	0	0	0	0	0	0	0	0	0	0	0	0	0	1	0	0	0	0	1	0	3	0	0	0	0	3	0	2	0	7	0	5	7	0	0	0	0	0	0	0
Otu0650	0	0	0	0	0	0	0	0	0	0	0	0	0	0	0	0	0	0	0	0	0	0	0	0	0	0	0	0	0	0	0	0	0	0	0	0	0	0	0	0	0	0	0	0	0	0	0	0	0
Otu0651	0	0	0	0	0	0	0	0	0	0	0	0	0	29	0	0	0	0	0	0	0	0	0	0	0	0	0	0	0	0	0	0	0	0	0	0	0	0	0	0	0	0	0	0	0	0	0	0	0
Otu0652	0	0	0	0	0	0	0	0	0	0	0	0	0	0	0	0	0	0	0	0	0	1	1	0	13	0	0	3	0	1	0	0	0	0	0	5	0	0	3	2	0	0	0	0	0	0	0	0	0
Otu0653	0	0	0	0	0	0	0	0	0	0	0	0	0	0	0	0	29	0	0	0	0	0	0	0	0	0	0	0	0	0	0	0	0	0	0	0	0	0	0	0	0	0	0	0	0	0	0	0	0
Otu0654	0	0	0	0	0	0	0	0	0	0	0	0	0	0	0	0	0	0	0	0	0	0	0	0	0	0	0	0	0	0	0	0	0	0	0	0	0	0	0	8	0	0	0	2	0	1	1	0	0
Otu0655	0	0	0	0	0	0	0	0	0	0	0	0	0	0	0	0	0	0	0	0	0	4	0	1	0	0	0	0	1	0	4	3	1	1	1	1	2	1	1	1	0	0	0	0	0	1	1	1	1
Otu0656	0	0	0	0	0	0	0	4	0	0	20	0	0	0	0	0	3	0	0	0	0	0	0	0	0	0	0	0	0	0	0	0	0	0	0	0	0	0	0	0	0	0	2	0	0	0	0	0	0
Otu0657	0	0	0	0	0	0	0	0	0	0	0	0	0	0	0	0	0	0	0	0	0	0	1	0	0	0	0	0	0	0	0	0	0	0	0	0	0	28	0	0	0	0	0	0	0	0	0	0	0
Otu0658	0	0	0	0	0	0	0	0	0	3	0	0	0	26	0	0	0	0	0	0	0	0	0	0	0	0	0	0	0	0	0	0	0	0	0	0	0	0	0	0	0	0	0	0	0	0	0	0	0
Otu0659	0	0	1	0	0	0	0	0	0	0	0	0	0	0	0	0	0	0	0	0	0	0	0	0	0	0	0	0	0	0	0	0	1	0	0	0	0	3	0	0	0	0	0	0	0	0	0	0	0
Otu0660	0	0	0	0	0	0	0	0	0	0	0	0	29	0	0	0	0	0	0	0	0	0	0	0	0	0	0	0	0	0	0	0	0	0	0	0	0	0	0	0	0	0	0	0	0	0	0	0	0
Otu0661	0	0	0	13	0	0	0	0	0	4	0	0	0	0	0	0	0	0	0	0	0	0	0	1	0	0	0	0	0	0	0	2	0	0	0	0	0	0	0	1	0	0	0	0	0	0	0	0	0
Otu0662	0	0	0	0	0	0	0	0	0	0	0	0	0	0	0	0	0	0	0	0	0	0	0	0	0	0	0	0	0	0	0	0	0	0	0	0	0	0	0	0	0	0	6	2	0	0	5	0	0
Otu0663	0	0	0	0	0	0	0	0	0	0	0	0	0	28	0	0	0	0	0	0	0	0	0	0	0	0	0	0	0	0	0	0	0	0	0	0	0	0	0	0	0	0	0	0	0	0	0	0	0
Otu0664	0	0	0	0	0	0	0	0	0	0	0	0	0	0	0	0	0	0	0	0	0	0	0	0	0	0	0	0	0	0	0	0	0	0	0	0	0	0	0	0	0	0	0	0	0	0	0	0	0
Otu0665	0	0	0	0	0	0	0	0	0	0	0	0	0	0	0	0	0	0	0	0	0	0	0	0	0	0	0	0	0	0	0	0	0	0	0	0	0	0	0	0	0	0	0	0	0	0	0	0	0
Otu0666	0	0	0	0	0	0	0	0	0	0	0	0	0	0	0	0	0	0	0	0	0	0	0	8	0	1	0	0	0	0	0	10	0	0	1	0	0	0	0	0	0	0	0	0	0	0	0	0	0
Otu0667	0	0	0	0	0	0	0	0	0	0	0	0	0	0	0	0	0	0	0	0	0	0	0	0	4	0	0	1	0	10	0	0	0	0	5	2	4	0	2	0	0	0	0	0	0	0	0	0	0
Otu0668	0	0	0	0	0	0	0	0	0	0	0	0	0	0	0	0	0	0	0	0	0	0	0	0	0	0	0	0	0	0	0	0	0	0	0	0	0	0	0	0	0	0	0	0	2	0	0	0	0
Otu0669	0	0	0	0	0	0	0	0	0	0	0	0	0	0	0	0	0	0	0	0	0	0	0	0	0	0	0	0	0	0	0	0	0	0	0	0	0	0	0	0	0	0	0	0	0	0	0	0	0
Otu0670	0	0	0	0	0	10	0	0	0	0	0	4	0	0	2	0	0	0	0	0	5	0	0	0	0	0	0	0	0	0	0	0	0	0	1	3	0	0	0	0	1	0	0	0	0	0	0	0	0
Otu0671	0	0	0	0	0	0	0	0	0	12	0	0	0	0	0	13	0	0	0	0	0	0	0	0	0	0	0	0	0	0	0	0	0	0	0	0	0	0	0	1	0	0	0	0	0	0	0	0	0
Otu0672	0	0	0	0	0	0	0	0	0	0	0	0	0	0	0	0	0	0	0	0	0	0	0	0	0	0	0	0	0	0	0	0	0	0	0	0	0	0	0	6	0	0	0	0	0	0	0	0	0
Otu0673	0	0	0	0	0	0	0	0	0	0	0	0	0	0	0	0	0	0	0	0	0	0	0	0	0	0	0	0	28	0	0	0	0	0	0	0	0	0	0	0	0	0	0	0	0	0	0	0	0
Otu0674	0	0	0	0	0	0	0	0	0	0	0	0	0	0	0	0	0	0	0	0	0	3	0	3	4	0	0	3	0	1	0	3	0	1	4	4	0	1	0	0	0	0	0	0	0	0	0	0	0
Otu0675	1	2	0	0	3	0	7	9	1	0	0	0	0	5	0	0	0	0	0	0	0	0	0	0	0	0	0	0	0	0	0	0	0	0	0	0	0	0	0	0	0	0	0	0	0	0	0	0	0
Otu0676	0	0	0	0	0	0	0	0	0	0	0	0	0	0	0	0	0	0	0	0	0	0	0	0	0	0	0	1	0	0	0	0	0	0	0	2	0	0	0	0	0	0	0	0	0	0	0	0	0
Otu0677	0	0	0	0	0	2	0	0	0	0	0	0	0	0	1	0	0	2	0	0	0	0	0	0	1	0	0	0	2	0	0	0	0	1	0	0	2	10	0	0	4	0	0	0	0	0	0	0	0
Otu0678	0	0	0	0	0	0	0	0	0	0	0	0	0	0	0	0	0	0	0	0	0	0	0	0	0	0	0	0	0	17	0	0	0	0	0	0	5	0	5	0	0	0	0	0	0	0	0	0	0
Otu0679	0	0	0	0	0	0	27	0	0	0	0	0	0	0	0	0	0	0	0	0	0	0	0	0	0	0	0	0	0	0	0	0	0	0	0	0	0	0	0	0	0	0	0	0	0	0	0	0	0
Otu0680	0	27	0	0	0	0	0	0	0	0	0	0	0	0	0	0	0	0	0	0	0	0	0	0	0	0	0	0	0	0	0	0	0	0	0	0	0	0	0	0	0	0	0	0	0	0	0	0	0
Otu0681	0	0	0	0	0	0	0	0	0	0	0	0	27	0	0	0	0	0	0	0	0	0	0	0	0	0	0	0	0	0	0	0	0	0	0	0	0	0	0	0	0	0	0	0	0	0	0	0	0
Otu0682	0	0	0	0	0	0	0	0	0	0	0	0	0	0	0	0	0	0	0	0	0	0	0	0	0	0	0	0	0	0	0	0	0	0	0	0	0	27	0	0	0	0	0	0	0	0	0	0	0
Otu0683	0	0	0	0	0	0	0	0	0	0	0	0	0	17	0	10	0	0	0	0	0	0	0	0	0	0	0	0	0	0	0	0	0	0	0	0	0	0	0	0	0	0	0	0	0	0	0	0	0
Otu0684	0	27	0	0	0	0	0	0	0	0	0	0	0	0	0	0	0	0	0	0	0	0	0	0	0	0	0	0	0	0	0	0	0	0	0	0	0	0	0	0	0	0	0	0	0	0	0	0	0
Otu0685	0	0	0	0	0	0	0	0	0	0	0	0	0	0	0	0	0	0	0	0	0	0	0	0	0	0	0	0	0	0	0	0	0	0	0	0	0	0	0	0	0	0	0	0	4	0	0	0	0
Otu0686	0	26	0	0	0	0	0	0	0	0	0	0	0	0	0	0	0	0	0	0	0	0	0	0	0	0	0	0	0	0	0	0	0	0	0	0	0	0	0	0	0	0	0	0	0	0	0	0	0
Otu0687	0	0	0	0	0	0	0	0	0	0	0	0	0	0	0	0	0	0	0	0	0	0	0	0	0	0	0	0	0	0	0	0	0	0	0	0	0	0	0	0	0	0	0	0	0	0	0	0	0
Otu0688	0	0	0	0	0	0	0	0	0	0	0	0	0	0	0	0	0	0	0	0	0	0	0	0	0	0	0	0	0	0	0	0	0	0	0	0	0	0	0	0	0	0	0	0	0	0	0	0	0
Otu0689	0	0	0	0	0	0	0	0	0	0	0	0	0	0	0	0	0	0	0	0	0	0	0	0	0	0	0	0	0	0	0	0	0	0	0	0	0	0	0	0	0	0	0	0	0	0	0	0	0
Otu0690	0	0	0	0	0	2	0	0	0	0	0	0	23	0	0	0	0	0	0	0	0	0	0	0	0	0	0	0	0	0	0	0	0	0	0	0	0	0	0	0	0	0	0	0	0	0	0	0	0
Otu0691	0	0	0	0	0	0	0	18	0	0	0	0	0	0	0	0	0	0	0	0	0	0	0	0	0	0	0	0	0	1	0	0	0	0	0	0	0	0	0	0	0	0	0	0	0	0	0	0	0
Otu0692	0	0	0	0	0	0	0	0	0	0	0	0	25	0	0	0	0	0	0	0	0	0	0	0	0	0	0	0	0	0	0	0	0	0	0	0	0	0	0	0	0	0	0	0	0	0	0	0	0
Otu0693	0	0	0	0	0	0	0	25	0	0	0	0	0	0	0	0	0	0	0	0	0	0	0	0	0	0	0	0	0	0	0	0	0	0	0	0	0	0	0	0	0	0	0	0	0	0	0	0	0
Otu0694	0	0	0	0	0	0	0	0	0	0	0	0	0	0	0	0	0	0	0	0	0	0	0	0	0	0	0	0	0	0	0	0	0	25	0	0	0	0	0	0	0	0	0	0	0	0	0	0	0
Otu0695	0	0	0	0	0	0	0	0	0	0	0	0	0	0	0	0	0	0	0	0	0	4	0	0	0	0	0	0	0	0	0	0	0	0	0	0	0	0	0	0	0	0	0	2	0	0	0	0	0
Otu0696	0	0	0	0	0	0	0	0	0	0	25	0	0	0	0	0	0	0	0	0	0	0	0	0	0	0	0	0	0	0	0	0	0	0	0	0	0	0	0	0	0	0	0	0	0	0	0	0	0
Otu0697	0	0	0	0	0	0	0	0	0	0	0	0	0	0	0	0	0	0	0	0	0	0	0	0	0	0	0	0	0	0	0	0	0	0	0	0	0	0	0	0	0	0	0	0	0	0	1	0	0
Otu0698	0	0	0	1	0	0	0	0	0	1	0	0	18	0	0	0	5	0	0	0	0	0	0	0	0	0	0	0	0	0	0	0	0	0	0	0	0	0	0	0	0	0	0	0	0	0	0	0	0
Otu0699	0	0	1	1	0	6	0	0	0	0	0	0	0	8	0	0	0	0	0	0	9	0	0	0	0	0	0	0	0	0	0	0	0	0	0	0	0	0	0	0	0	0	0	0	0	0	0	0	0
Otu0700	1	0	2	0	0	0	0	0	0	0	0	0	0	0	0	0	0	2	0	0	0	1	0	0	0	0	0	0	0	0	0	0	0	0	0	3	0	0	16	0	0	0	0	0	0	0	0	0	0
Otu0701	0	0	0	1	0	0	0	0	0	6	0	0	0	0	0	0	0	0	0	0	0	0	1	2	1	0	0	0	0	0	0	5	0	2	0	0	0	0	2	0	0	1	0	0	0	0	0	0	0
Otu0702	0	0	0	0	0	0	0	0	0	0	10	0	0	0	0	2	0	0	0	0	0	0	0	0	0	0	0	0	0	0	0	0	0	0	0	0	0	0	0	0	0	0	12	0	0	0	0	0	0
Otu0703	0	0	0	0	0	0	0	0	0	0	0	0	0	0	0	0	0	0	0	0	0	0	0	0	0	0	0	0	4	0	0	20	0	0	0	0	0	0	0	0	0	0	0	0	0	0	0	0	0
Otu0704	0	0	0	0	0	0	0	0	0	0	0	0	0	0	0	0	0	0	0	0	0	7	1	4	2	0	0	0	4	1	0	0	0	0	4	1	0	0	0	0	0	0	0	0	0	0	0	0	0
Otu0705	0	0	0	0	0	0	0	0	0	0	0	0	0	0	0	0	0	0	0	0	0	0	0	0	0	0	0	0	0	0	0	0	0	0	0	0	0	0	0	0	0	0	0	0	0	0	24	0	0
Otu0706	0	0	0	0	0	0	0	0	0	0	0	0	0	0	0	0	0	0	0	0	0	0	0	0	0	0	0	0	0	0	0	0	0	0	0	0	0	0	0	0	0	0	0	0	0	0	0	0	0
Otu0707	0	0	0	0	0	0	0	0	0	0	0	0	0	0	0	0	0	0	0	0	0	0	0	0	0	0	0	0	0	0	0	0	0	0	0	0	0	0	0	0	0	0	0	0	0	0	0	0	0
Otu0708	0	0	0	0	0	0	0	0	0	0	0	0	0	0	0	0	0	0	0	0	0	0	0	0	1	0	0	0	0	0	0	3	0	0	1	1	0	1	1	4	1	0	0	0	0	0	0	0	0
Otu0709	0	0	0	0	0	0	0	0	0	0	0	0	0	0	0	0	24	0	0	0	0	0	0	0	0	0	0	0	0	0	0	0	0	0	0	0	0	0	0	0	0	0	0	0	0	0	0	0	0
Otu0710	0	0	0	0	0	0	0	0	0	2	0	0	0	0	0	0	0	0	0	0	0	0	3	0	3	0	0	0	1	0	0	0	0	0	0	0	0	9	2	1	0	0	0	0	0	0	0	0	0
Otu0711	0	0	0	0	0	0	0	0	0	0	0	0	0	0	0	0	0	0	0	0	0	1	3	5	0	0	0	0	3	0	0	0	0	0	1	1	0	0	0	0	0	0	0	0	0	0	3	0	0
Otu0712	0	0	0	0	0	0	0	0	0	0	0	0	0	0	0	24	0	0	0	0	0	0	0	0	0	0	0	0	0	0	0	0	0	0	0	0	0	0	0	0	0	0	0	0	0	0	0	0	0
Otu0713	0	0	0	0	0	0	0	0	0	0	24	0	0	0	0	0	0	0	0	0	0	0	0	0	0	0	0	0	0	0	0	0	0	0	0	0	0	0	0	0	0	0	0	0	0	0	0	0	0
Otu0714	0	0	0	0	0	0	0	0	0	0	0	0	0	0	0	0	0	0	0	0	0	0	0	0	0	0	0	0	0	0	0	10	0	0	0	0	0	1	0	5	0	0	0	0	0	0	7	0	0
Otu0715	0	0	0	0	0	0	0	0	0	0	0	0	0	0	0	0	0	0	0	0	0	0	0	1	0	2	0	0	0	0	0	0	1	0	0	0	0	0	1	0	0	0	0	2	0	2	0	0	0
Otu0716	0	0	0	0	0	6	0	0	0	7	9	0	0	0	0	1	0	0	0	0	0	0	0	0	0	0	0	0	0	0	0	0	0	0	0	0	0	0	0	0	0	0	0	0	0	0	0	0	0
Otu0717	0	0	0	0	0	0	0	0	0	0	0	0	0	0	0	0	0	0	0	0	0	0	0	0	0	0	0	0	0	0	0	0	0	0	0	0	0	0	0	0	0	0	0	0	0	0	0	0	0
Otu0718	0	0	0	0	0	0	0	0	0	0	0	0	23	0	0	0	0	0	0	0	0	0	0	0	0	0	0	0	0	0	0	0	0	0	0	0	0	0	0	0	0	0	0	0	0	0	0	0	0
Otu0719	7	16	0	0	0	0	0	0	0	0	0	0	0	0	0	0	0	0	0	0	0	0	0	0	0	0	0	0	0	0	0	0	0	0	0	0	0	0	0	0	0	0	0	0	0	0	0	0	0
Otu0720	0	0	0	0	0	0	0	0	0	0	0	0	0	0	0	0	0	0	0	0	0	0	0	0	0	0	0	0	0	0	0	0	0	0	0	0	0	0	0	0	0	0	0	0	0	0	0	0	0
Otu0721	0	0	0	2	0	0	0	0	0	0	0	14	0	0	0	0	7	0	0	0	0	0	0	0	0	0	0	0	0	0	0	0	0	0	0	0	0	0	0	0	0	0	0	0	0	0	0	0	0
Otu0722	0	0	0	0	16	0	0	7	0	0	0	0	0	0	0	0	0	0	0	0	0	0	0	0	0	0	0	0	0	0	0	0	0	0	0	0	0	0	0	0	0	0	0	0	0	0	0	0	0
Otu0723	0	0	0	0	0	0	0	0	0	0	0	0	0	0	0	0	0	0	0	0	0	0	0	0	0	0	0	0	0	0	0	0	0	0	0	0	0	0	14	0	0	9	0	0	0	0	0	0	0
Otu0724	0	0	0	0	0	0	0	0	0	0	0	0	0	0	0	0	0	0	0	0	0	0	0	0	0	0	0	0	0	0	0	0	0	0	0	0	0	0	0	0	0	0	8	0	0	0	1	2	0
Otu0725	0	0	0	0	0	0	0	0	0	23	0	0	0	0	0	0	0	0	0	0	0	0	0	0	0	0	0	0	0	0	0	0	0	0	0	0	0	0	0	0	0	0	0	0	0	0	0	0	0
Otu0726	0	0	0	0	0	0	0	0	0	0	0	0	0	0	0	0	0	0	0	0	0	0	4	2	0	0	0	0	0	0	0	1	0	0	0	2	0	0	3	10	0	0	0	0	1	0	0	0	0
Otu0727	0	0	0	0	0	0	0	0	0	0	0	0	0	0	0	0	0	0	0	0	0	0	1	0	1	0	0	0	0	0	0	0	0	0	0	0	0	0	0	0	0	0	0	0	0	0	0	0	0
Otu0728	0	0	0	0	0	0	23	0	0	0	0	0	0	0	0	0	0	0	0	0	0	0	0	0	0	0	0	0	0	0	0	0	0	0	0	0	0	0	0	0	0	0	0	0	0	0	0	0	0
Otu0729	0	0	0	0	0	0	0	0	0	0	0	0	0	0	0	0	0	0	0	0	0	0	0	0	0	0	0	0	0	0	0	0	0	0	0	0	0	0	0	0	0	0	0	0	0	0	0	0	0
Otu0730	0	0	0	0	0	0	0	0	0	0	0	0	0	0	0	0	0	0	0	0	4	0	8	0	0	0	0	0	0	0	1	0	0	0	3	1	2	0	0	0	0	0	0	0	0	0	0	0	0
Otu0731	0	22	0	0	0	0	0	0	0	0	0	0	0	0	0	0	0	0	0	0	0	0	0	0	0	0	0	0	0	0	0	0	0	0	0	0	0	0	0	0	0	0	0	0	0	0	0	0	0
Otu0732	0	0	0	0	0	0	0	0	0	0	0	0	0	0	0	0	0	0	0	0	0	0	0	0	0	0	0	0	0	0	0	0	0	22	0	0	0	0	0	0	0	0	0	0	0	0	0	0	0
Otu0733	0	0	0	0	0	0	0	1	0	0	0	0	17	0	0	2	0	0	0	0	2	0	0	0	0	0	0	0	0	0	0	0	0	0	0	0	0	0	0	0	0	0	0	0	0	0	0	0	0
Otu0734	0	0	0	0	0	0	0	0	0	0	0	0	0	0	0	0	0	0	0	0	0	6	0	0	0	0	0	0	0	0	0	0	1	0	0	5	0	0	0	2	0	0	0	0	0	0	0	0	0
Otu0735	0	0	0	0	0	0	0	0	0	0	0	0	0	0	0	0	0	0	0	0	0	0	0	0	0	0	0	0	22	0	0	0	0	0	0	0	0	0	0	0	0	0	0	0	0	0	0	0	0
Otu0736	0	0	0	0	0	0	0	0	0	0	0	0	0	0	0	0	0	0	0	0	0	0	0	0	0	0	0	0	1	0	0	1	0	0	0	0	0	0	0	0	0	0	0	0	0	0	14	0	0
Otu0737	0	0	0	0	0	0	0	0	0	0	0	0	0	0	0	0	0	0	0	0	0	0	0	0	0	0	0	0	0	0	0	0	0	0	0	0	0	0	0	0	0	0	0	0	0	0	0	0	0
Otu0738	0	0	0	0	0	0	0	0	0	0	0	0	0	0	0	0	0	0	0	0	0	0	0	0	0	0	0	0	0	0	0	0	0	0	0	0	0	0	0	0	0	0	0	0	0	0	0	0	0
Otu0739	0	0	0	0	0	0	0	0	0	0	0	0	0	0	0	0	0	0	0	0	0	2	0	0	1	0	0	0	0	0	1	0	0	0	1	0	0	0	0	2	0	0	0	0	0	0	1	0	0
Otu0740	0	0	0	0	0	0	0	2	0	0	16	0	0	4	0	0	0	0	0	0	0	0	0	0	0	0	0	0	0	0	0	0	0	0	0	0	0	0	0	0	0	0	0	0	0	0	0	0	0
Otu0741	0	0	0	0	0	0	14	0	0	8	0	0	0	0	0	0	0	0	0	0	0	0	0	0	0	0	0	0	0	0	0	0	0	0	0	0	0	0	0	0	0	0	0	0	0	0	0	0	0
Otu0742	3	0	0	0	0	0	0	0	0	0	0	0	0	0	0	0	0	0	0	0	0	0	0	0	0	0	0	0	0	0	0	0	0	0	0	0	0	0	0	0	0	0	0	0	0	0	0	0	0
Otu0743	0	0	0	0	0	0	0	0	0	0	0	0	0	0	0	0	0	0	0	0	0	0	0	0	0	0	0	0	0	0	0	0	0	0	0	0	0	0	0	0	0	0	0	0	0	0	0	0	0
Otu0744	0	0	0	0	0	0	0	0	0	0	0	0	0	0	0	22	0	0	0	0	0	0	0	0	0	0	0	0	0	0	0	0	0	0	0	0	0	0	0	0	0	0	0	0	0	0	0	0	0
Otu0745	0	0	0	0	0	0	0	0	0	0	0	0	0	0	0	0	0	0	0	0	0	0	0	0	0	0	0	0	0	0	0	0	0	0	0	0	0	0	0	0	0	0	0	0	0	0	21	0	0
Otu0746	0	4	0	0	0	0	0	7	0	0	0	0	0	0	0	0	0	0	0	0	0	0	0	3	0	0	0	0	0	0	0	0	0	0	0	0	0	0	0	1	0	0	0	0	0	0	0	0	0
Otu0747	0	0	0	0	0	0	0	0	0	0	0	0	0	0	0	0	0	0	0	0	0	0	0	0	0	0	0	1	0	0	0	0	0	0	0	4	0	0	0	0	2	14	0	0	0	0	0	0	0
Otu0748	0	0	0	0	0	0	0	0	0	0	0	0	0	0	0	0	0	0	0	0	0	0	0	0	0	0	0	0	0	0	0	0	0	0	0	0	0	7	0	2	0	0	0	0	0	0	1	0	0
Otu0749	0	0	0	0	0	0	0	0	1	0	0	0	0	0	0	6	0	0	0	0	0	0	0	0	0	0	0	0	0	0	0	0	0	0	0	0	0	0	0	0	0	0	0	0	0	0	0	0	0
Otu0750	0	0	0	0	0	0	0	0	0	0	0	0	15	6	0	0	0	0	0	0	0	0	0	0	0	0	0	0	0	0	0	0	0	0	0	0	0	0	0	0	0	0	0	0	0	0	0	0	0
Otu0751	0	0	0	0	0	0	0	0	0	0	0	0	0	0	0	0	0	0	0	0	0	0	0	0	0	0	0	0	0	0	0	0	0	0	0	0	0	0	0	0	0	0	0	0	0	0	0	0	0
Otu0752	0	0	0	0	0	0	0	0	2	0	0	0	0	0	0	0	3	1	0	0	0	0	0	0	2	0	2	0	0	0	0	4	0	0	0	0	0	0	0	0	0	0	0	0	0	0	0	0	0
Otu0753	0	0	0	0	0	0	0	0	0	0	0	0	0	0	0	4	0	0	0	0	0	0	0	0	1	7	0	0	3	0	0	0	0	0	0	0	0	0	0	0	0	1	0	0	0	0	0	0	0
Otu0754	0	0	0	0	0	0	0	0	0	0	0	0	21	0	0	0	0	0	0	0	0	0	0	0	0	0	0	0	0	0	0	0	0	0	0	0	0	0	0	0	0	0	0	0	0	0	0	0	0
Otu0755	0	0	0	0	0	0	0	0	0	0	0	0	0	0	0	0	0	0	0	0	8	0	0	0	0	4	0	0	0	0	0	0	0	0	0	0	0	0	0	0	0	0	0	0	0	0	0	0	0
Otu0756	0	0	0	0	0	0	0	0	0	0	0	0	0	0	0	0	0	0	0	0	0	0	0	0	0	0	0	0	0	0	0	0	0	0	0	0	0	0	0	0	0	0	0	0	0	0	0	0	0
Otu0757	0	0	0	0	0	0	0	0	0	0	0	0	0	0	0	0	0	0	0	0	0	0	0	0	0	0	0	0	0	0	0	0	0	0	0	0	0	0	0	0	0	0	0	0	0	0	0	0	0
Otu0758	0	0	0	0	0	0	0	0	0	15	0	0	0	0	0	0	0	0	0	0	0	0	0	0	1	0	0	0	0	0	0	0	0	0	0	0	0	0	0	1	0	0	0	0	0	0	0	0	0
Otu0759	0	0	0	0	2	1	1	0	1	3	0	0	5	0	0	3	0	0	3	0	0	0	0	0	0	0	0	0	0	0	2	0	0	0	0	0	0	0	0	0	0	0	0	0	0	0	0	0	0
Otu0760	0	20	0	0	0	0	0	0	0	0	0	0	0	0	0	0	0	0	0	0	0	0	0	0	0	0	0	0	0	0	0	0	0	0	0	0	0	0	0	0	0	0	0	0	0	0	0	0	0
Otu0761	0	0	0	0	0	1	0	0	0	0	0	0	0	0	0	0	0	0	0	0	0	0	0	0	0	0	0	0	0	0	0	0	0	0	0	0	0	0	0	0	0	0	0	0	0	0	0	0	0
Otu0762	0	20	0	0	0	0	0	0	0	0	0	0	0	0	0	0	0	0	0	0	0	0	0	0	0	0	0	0	0	0	0	0	0	0	0	0	0	0	0	0	0	0	0	0	0	0	0	0	0
Otu0763	0	0	0	0	0	0	0	0	0	0	0	0	0	0	0	0	0	0	0	0	0	1	0	3	0	0	1	0	0	0	1	0	1	0	0	0	0	0	0	0	0	0	2	0	0	2	0	0	0
Otu0764	0	0	0	0	0	0	0	0	0	0	0	0	0	0	0	0	0	0	0	0	0	0	0	0	2	0	0	0	10	0	0	1	0	0	4	0	0	0	0	2	0	1	0	0	0	0	0	0	0
Otu0765	0	0	0	0	0	0	0	0	0	0	0	0	0	20	0	0	0	0	0	0	0	0	0	0	0	0	0	0	0	0	0	0	0	0	0	0	0	0	0	0	0	0	0	0	0	0	0	0	0
Otu0766	0	0	0	0	0	0	0	20	0	0	0	0	0	0	0	0	0	0	0	0	0	0	0	0	0	0	0	0	0	0	0	0	0	0	0	0	0	0	0	0	0	0	0	0	0	0	0	0	0
Otu0767	0	0	0	0	0	0	0	0	0	0	0	0	0	0	0	0	0	0	0	0	0	0	0	0	0	0	0	0	0	0	0	0	0	0	0	0	0	0	0	0	0	0	0	0	0	0	0	0	0
Otu0768	0	0	0	0	0	0	0	0	0	0	0	0	20	0	0	0	0	0	0	0	0	0	0	0	0	0	0	0	0	0	0	0	0	0	0	0	0	0	0	0	0	0	0	0	0	0	0	0	0
Otu0769	0	0	0	0	0	0	0	0	0	0	0	0	0	0	0	0	0	0	0	0	0	0	0	0	0	0	0	0	0	0	0	0	0	0	0	0	0	0	0	0	0	0	0	0	0	0	0	0	0
Otu0770	0	0	0	0	0	0	0	0	0	0	0	0	20	0	0	0	0	0	0	0	0	0	0	0	0	0	0	0	0	0	0	0	0	0	0	0	0	0	0	0	0	0	0	0	0	0	0	0	0
Otu0771	0	0	0	0	3	0	0	0	0	0	2	0	0	0	0	0	2	0	0	0	0	1	0	0	0	0	0	1	0	0	0	0	1	0	0	0	0	0	0	0	0	0	0	0	0	0	0	0	0
Otu0772	0	0	0	0	0	0	0	0	0	0	8	0	0	11	0	0	0	0	0	0	0	0	0	0	0	0	0	0	0	0	0	0	0	0	0	0	0	0	0	0	0	0	0	0	0	0	0	0	0
Otu0773	0	0	0	0	0	0	0	0	0	0	0	0	0	0	0	0	0	0	0	0	0	0	0	0	0	1	0	0	0	0	0	3	0	0	0	0	0	0	1	6	0	1	0	0	0	0	0	0	0
Otu0774	0	0	0	0	0	0	0	0	0	0	0	0	0	0	0	0	0	0	0	0	0	0	0	1	0	0	0	0	0	0	0	0	0	0	0	0	0	0	0	0	0	0	0	0	0	0	0	0	0
Otu0775	0	0	0	0	0	0	0	0	0	18	0	0	0	0	0	0	0	0	0	0	0	0	0	0	0	0	0	0	0	0	0	0	0	0	0	0	0	0	0	1	0	0	0	0	0	0	0	0	0
Otu0776	0	0	10	0	0	0	0	0	0	0	0	3	0	0	1	0	0	0	0	0	5	0	0	0	0	0	0	0	0	0	0	0	0	0	0	0	0	0	0	0	0	0	0	0	0	0	0	0	0
Otu0777	0	0	0	0	0	0	0	0	0	0	0	0	0	0	0	0	0	0	0	0	0	0	0	0	1	0	0	0	0	0	1	0	0	0	0	0	0	0	0	0	1	0	0	0	0	0	0	1	0
Otu0778	0	0	0	0	0	0	0	0	0	0	0	0	0	0	0	0	0	0	0	0	0	0	0	0	0	0	0	0	0	0	0	0	0	0	0	0	0	0	0	13	0	0	0	0	0	0	0	0	0
Otu0779	0	0	0	0	0	0	0	19	0	0	0	0	0	0	0	0	0	0	0	0	0	0	0	0	0	0	0	0	0	0	0	0	0	0	0	0	0	0	0	0	0	0	0	0	0	0	0	0	0
Otu0780	0	0	0	0	0	0	0	0	0	0	0	0	0	0	0	0	0	1	0	0	0	0	0	0	0	0	0	0	0	1	1	0	0	0	2	3	3	0	2	0	0	0	0	0	0	0	0	0	4
Otu0781	0	19	0	0	0	0	0	0	0	0	0	0	0	0	0	0	0	0	0	0	0	0	0	0	0	0	0	0	0	0	0	0	0	0	0	0	0	0	0	0	0	0	0	0	0	0	0	0	0
Otu0782	0	0	0	0	0	0	0	0	0	0	0	0	0	0	0	0	0	0	0	0	0	0	0	0	0	5	0	0	0	4	0	0	0	0	0	8	0	0	0	0	1	0	0	0	0	0	0	0	0
Otu0783	0	0	0	0	0	0	0	0	0	0	0	0	0	0	0	0	0	0	0	0	0	0	0	0	4	0	0	2	0	0	0	0	0	0	0	0	0	10	0	0	0	1	0	0	0	0	0	0	0
Otu0784	0	0	0	1	0	0	0	0	0	0	0	0	0	0	0	0	0	0	0	0	0	0	0	0	0	0	0	0	1	0	0	5	1	0	1	0	0	0	0	7	1	0	0	0	1	0	1	0	0
Otu0785	0	0	0	0	0	0	0	0	0	0	0	0	0	0	0	0	0	0	0	0	0	0	0	0	0	0	0	0	0	0	0	0	0	0	0	0	0	0	0	0	0	0	0	0	0	0	0	0	0
Otu0786	0	18	0	0	0	0	0	0	0	0	0	0	0	0	0	0	0	0	0	0	0	0	0	0	0	0	0	0	0	0	0	0	0	0	0	0	0	0	0	0	0	0	0	0	0	0	0	0	0
Otu0787	0	0	0	0	0	0	0	0	0	0	0	0	0	0	0	0	0	0	0	0	0	0	0	0	0	0	0	0	0	0	0	0	0	0	0	0	0	0	0	0	0	0	0	0	1	0	0	0	0
Otu0788	0	0	0	0	0	0	0	0	0	0	0	1	0	0	1	0	0	0	0	0	0	0	0	0	0	0	0	0	0	6	0	0	0	3	0	4	0	0	0	0	0	1	0	0	0	0	0	0	0
Otu0789	0	0	0	0	0	1	0	0	0	0	0	1	0	0	1	0	0	0	0	0	0	0	0	0	0	0	0	0	0	0	0	7	0	0	0	0	0	0	0	8	0	0	0	0	0	0	0	0	0
Otu0790	0	0	0	0	0	0	0	0	0	0	0	0	0	0	0	0	0	0	0	0	0	0	0	0	0	0	0	0	0	0	0	0	0	0	0	0	0	0	0	0	0	0	0	0	0	0	0	0	0
Otu0791	0	0	0	0	0	0	0	0	0	0	0	0	0	0	0	0	0	0	0	0	0	0	0	0	0	0	0	0	0	0	0	0	0	0	0	0	0	0	0	0	0	0	0	0	0	0	0	0	0
Otu0792	0	0	0	0	0	0	0	0	0	0	0	0	0	0	0	0	0	0	0	0	0	0	0	0	0	0	0	0	0	0	0	0	0	0	0	0	0	0	0	0	0	0	0	0	0	0	0	0	0
Otu0793	0	0	0	0	0	0	0	0	0	0	0	0	0	0	0	18	0	0	0	0	0	0	0	0	0	0	0	0	0	0	0	0	0	0	0	0	0	0	0	0	0	0	0	0	0	0	0	0	0
Otu0794	0	0	0	0	0	0	0	0	0	0	0	0	0	0	0	0	0	0	0	0	0	0	0	0	5	0	0	0	5	0	0	0	0	0	0	0	0	0	1	0	0	0	0	0	0	0	0	0	0
Otu0795	0	0	0	0	0	0	0	0	0	0	0	0	18	0	0	0	0	0	0	0	0	0	0	0	0	0	0	0	0	0	0	0	0	0	0	0	0	0	0	0	0	0	0	0	0	0	0	0	0
Otu0796	0	0	0	0	0	0	0	0	0	0	0	0	0	0	0	0	0	0	0	0	0	0	0	0	0	0	0	0	0	0	0	0	0	0	0	0	0	0	0	0	0	0	0	0	0	0	0	0	0
Otu0797	0	0	0	0	0	0	0	0	0	0	0	0	0	0	0	17	0	0	0	0	0	0	0	0	0	0	0	0	0	0	0	0	0	0	0	0	0	0	0	0	0	0	0	0	0	0	0	0	0
Otu0798	0	0	0	0	0	0	0	0	0	0	0	0	0	0	0	0	0	0	0	0	0	0	0	0	0	0	0	0	0	0	0	0	0	0	0	0	0	0	0	0	0	0	0	0	0	0	0	0	0
Otu0799	0	0	0	0	0	0	0	0	0	0	0	0	0	0	0	0	0	0	0	0	0	0	2	1	3	0	0	0	3	0	0	0	0	0	0	1	0	1	1	0	0	0	0	0	0	0	0	0	0
Otu0800	0	0	0	0	0	0	0	0	0	0	0	0	0	0	0	0	0	0	0	0	2	0	0	0	6	0	0	0	0	0	0	0	0	0	0	0	0	0	6	0	0	3	0	0	0	0	0	0	0
Otu0801	0	0	0	0	0	0	0	0	0	0	0	0	0	0	0	0	18	0	0	0	0	0	0	0	0	0	0	0	0	0	0	0	0	0	0	0	0	0	0	0	0	0	0	0	0	0	0	0	0
Otu0802	0	0	0	0	0	0	0	0	0	0	0	0	0	0	0	0	0	0	0	0	0	0	0	0	0	0	0	0	17	0	0	0	0	0	0	0	0	0	0	0	0	0	0	0	0	0	0	0	0
Otu0803	0	0	0	0	0	0	0	0	0	0	0	0	0	0	0	0	0	0	0	0	0	0	0	0	0	0	0	0	0	0	0	0	0	0	0	0	0	0	0	0	0	0	0	0	0	0	0	0	0
Otu0804	0	13	0	0	0	0	2	0	0	0	0	0	0	0	0	0	0	0	0	0	2	0	0	0	0	0	0	0	0	0	0	0	0	0	0	0	0	0	0	0	0	0	0	0	0	0	0	0	0
Otu0805	0	0	0	5	0	0	0	3	0	0	0	0	0	0	0	0	0	0	0	0	0	0	0	0	1	0	0	0	0	0	1	0	0	0	0	0	0	0	0	0	6	0	0	0	0	0	0	0	0
Otu0806	0	0	0	0	0	0	0	0	0	0	0	0	0	0	0	0	0	0	0	0	0	0	0	0	0	0	0	0	0	0	0	0	0	0	0	0	0	0	0	0	0	0	3	0	1	1	0	0	0
Otu0807	0	0	0	0	0	0	10	0	0	0	0	0	0	0	0	0	0	0	0	0	0	0	0	2	1	0	0	0	1	0	0	2	0	0	1	0	0	0	0	0	0	0	0	0	0	0	0	0	0
Otu0808	0	0	0	0	0	0	0	0	0	0	0	0	0	0	0	0	0	0	0	0	0	0	0	0	0	0	0	0	0	0	0	0	0	0	0	0	0	0	0	0	0	0	0	0	0	0	0	0	0
Otu0809	0	0	0	0	0	0	0	0	0	0	17	0	0	0	0	0	0	0	0	0	0	0	0	0	0	0	0	0	0	0	0	0	0	0	0	0	0	0	0	0	0	0	0	0	0	0	0	0	0
Otu0810	0	0	0	0	0	0	0	0	0	0	0	0	0	0	0	0	0	0	0	0	0	0	0	0	0	0	0	0	0	0	0	0	0	0	0	0	0	0	0	0	0	0	0	0	0	0	0	0	0
Otu0811	0	0	0	0	0	0	0	0	0	0	0	0	0	0	0	0	0	0	0	0	0	0	0	0	0	0	0	0	0	0	0	0	0	0	0	0	0	0	0	0	0	0	13	0	0	0	0	0	0
Otu0812	0	0	0	0	0	0	0	0	0	0	0	0	0	0	0	0	0	0	0	0	0	0	0	0	0	0	0	0	0	0	7	0	0	1	0	0	0	0	0	0	0	0	0	0	0	0	0	4	0
Otu0813	0	0	0	0	0	0	0	0	0	0	0	0	0	0	0	0	0	0	0	0	0	0	0	0	0	0	0	0	0	0	0	0	0	0	0	0	0	0	0	0	0	0	0	0	0	0	0	0	0
Otu0814	0	0	0	0	0	0	0	0	0	0	0	0	0	0	0	0	0	0	0	0	0	0	0	0	0	0	0	0	0	0	0	0	0	0	0	0	0	0	0	0	0	0	0	0	0	0	17	0	0
Otu0815	0	0	0	0	0	0	0	0	0	0	17	0	0	0	0	0	0	0	0	0	0	0	0	0	0	0	0	0	0	0	0	0	0	0	0	0	0	0	0	0	0	0	0	0	0	0	0	0	0
Otu0816	0	0	1	0	0	0	0	0	0	5	0	0	0	11	0	0	0	0	0	0	0	0	0	0	0	0	0	0	0	0	0	0	0	0	0	0	0	0	0	0	0	0	0	0	0	0	0	0	0
Otu0817	0	0	0	0	0	0	0	0	0	0	0	0	0	0	0	0	0	0	0	0	0	0	0	0	0	0	0	15	0	2	0	0	0	0	0	0	0	0	0	0	0	0	0	0	0	0	0	0	0
Otu0818	0	0	0	0	0	0	0	0	0	0	0	0	0	0	0	0	0	0	0	0	0	0	0	0	0	0	0	0	0	0	0	0	0	0	0	0	0	0	0	0	0	0	0	0	0	0	0	0	0
Otu0819	0	0	0	0	0	0	0	0	2	0	0	0	0	0	0	0	0	0	0	0	0	2	0	2	0	0	0	0	0	0	0	0	0	1	3	2	0	0	0	0	0	0	0	0	0	0	0	0	1
Otu0820	0	0	0	0	0	0	0	0	0	0	0	0	0	0	0	0	0	0	0	0	0	0	0	0	0	0	0	0	0	0	0	0	0	0	0	0	0	0	0	0	0	0	0	1	1	0	0	0	0
Otu0821	0	0	0	0	0	0	0	0	0	0	0	0	0	0	0	0	0	0	0	0	0	0	2	3	0	2	6	0	1	0	0	0	0	0	0	0	0	0	0	1	2	0	0	0	0	0	0	0	0
Otu0822	0	0	0	0	0	0	0	0	0	0	0	0	0	0	0	0	0	0	0	0	0	0	0	0	0	0	0	0	0	0	1	0	0	1	0	2	0	0	0	0	0	0	0	1	2	0	0	0	0
Otu0823	0	0	0	0	0	0	0	0	0	0	0	0	0	0	0	0	0	0	0	0	0	0	0	0	0	0	0	0	0	0	0	0	0	0	0	0	0	0	0	0	0	0	0	0	0	0	0	0	0
Otu0824	0	10	0	5	0	0	0	0	0	0	0	0	0	0	0	0	0	1	0	0	1	0	0	0	0	0	0	0	0	0	0	0	0	0	0	0	0	0	0	0	0	0	0	0	0	0	0	0	0
Otu0825	0	0	0	0	0	0	0	0	0	0	0	0	0	0	0	0	0	0	0	0	0	1	0	0	0	0	0	0	0	0	0	0	0	0	0	0	15	0	0	0	0	0	0	0	0	0	0	0	0
Otu0826	0	0	0	0	0	0	0	0	0	0	0	0	0	0	0	0	0	0	0	0	0	0	0	0	0	0	0	0	0	0	0	0	0	0	0	0	0	0	0	10	0	0	0	0	0	0	0	0	0
Otu0827	0	0	0	0	0	0	0	0	0	0	0	0	0	0	0	0	0	0	0	0	0	0	0	0	0	0	0	1	0	2	0	0	0	0	0	0	0	0	0	13	0	0	0	0	0	0	0	0	0
Otu0828	0	0	0	0	0	0	0	0	0	0	0	0	0	0	0	0	16	0	0	0	0	0	0	0	0	0	0	0	0	0	0	0	0	0	0	0	0	0	0	0	0	0	0	0	0	0	0	0	0
Otu0829	0	0	0	0	0	0	0	0	0	0	0	0	0	0	0	0	0	0	0	0	0	0	0	0	0	0	1	0	0	0	0	0	0	0	14	0	1	0	0	0	0	0	0	0	0	0	0	0	0
Otu0830	0	0	0	0	0	0	0	0	0	0	0	0	16	0	0	0	0	0	0	0	0	0	0	0	0	0	0	0	0	0	0	0	0	0	0	0	0	0	0	0	0	0	0	0	0	0	0	0	0
Otu0831	0	0	0	0	0	0	0	0	0	0	0	0	0	0	0	0	0	0	0	0	0	0	0	0	0	0	0	0	6	0	0	2	0	0	4	0	1	0	0	0	0	0	0	0	0	0	0	0	0
Otu0832	0	0	0	0	0	0	0	0	0	0	0	0	0	0	0	0	0	0	0	0	0	0	0	0	0	0	0	0	0	0	1	0	0	0	0	0	0	0	0	0	0	0	0	0	0	0	0	0	0
Otu0833	0	0	0	0	0	0	0	0	0	0	0	0	0	0	0	0	0	0	0	0	0	9	0	0	0	0	0	0	0	0	0	0	0	0	0	0	0	0	0	7	0	0	0	0	0	0	0	0	0
Otu0834	0	0	0	0	0	0	0	0	0	0	0	0	16	0	0	0	0	0	0	0	0	0	0	0	0	0	0	0	0	0	0	0	0	0	0	0	0	0	0	0	0	0	0	0	0	0	0	0	0
Otu0835	0	0	0	0	0	0	0	0	0	0	0	0	0	0	0	0	0	0	0	0	0	3	0	0	0	1	0	0	0	0	1	1	0	0	0	0	1	0	0	0	0	0	0	1	1	0	2	0	0
Otu0836	0	0	0	0	0	0	0	0	0	0	0	0	0	0	0	0	0	0	0	0	0	0	0	0	0	0	0	0	0	0	0	0	0	0	0	0	0	0	0	0	0	0	0	0	0	0	0	0	0
Otu0837	0	0	0	0	0	0	0	0	0	0	0	0	0	0	0	0	0	0	0	0	0	0	0	0	3	0	0	1	0	3	1	0	0	0	0	1	2	2	0	0	0	1	0	0	0	0	0	0	0
Otu0838	0	16	0	0	0	0	0	0	0	0	0	0	0	0	0	0	0	0	0	0	0	0	0	0	0	0	0	0	0	0	0	0	0	0	0	0	0	0	0	0	0	0	0	0	0	0	0	0	0
Otu0839	0	0	0	0	0	0	0	0	0	0	0	0	0	0	0	0	0	0	0	0	0	1	0	0	0	0	0	0	0	0	0	0	0	0	6	0	0	0	2	0	0	7	0	0	0	0	0	0	0
Otu0840	4	8	0	0	2	0	0	2	0	0	0	0	0	0	0	0	0	0	0	0	0	0	0	0	0	0	0	0	0	0	0	0	0	0	0	0	0	0	0	0	0	0	0	0	0	0	0	0	0
Otu0841	0	0	0	0	0	0	0	0	0	0	0	0	0	0	0	0	0	0	0	0	0	0	0	0	0	0	1	0	0	1	0	0	0	0	0	0	0	0	0	0	0	0	0	0	0	0	0	0	0
Otu0842	0	0	0	0	0	0	0	0	0	0	0	0	0	0	0	0	0	0	0	0	0	0	0	0	0	0	0	0	0	0	0	2	0	0	0	0	0	0	0	7	7	0	0	0	0	0	0	0	0
Otu0843	0	0	0	0	0	0	0	0	0	0	9	0	0	7	0	0	0	0	0	0	0	0	0	0	0	0	0	0	0	0	0	0	0	0	0	0	0	0	0	0	0	0	0	0	0	0	0	0	0
Otu0844	0	0	0	0	0	0	0	0	0	0	0	0	0	0	0	0	0	0	0	0	0	0	0	0	0	0	0	0	0	0	0	0	0	0	0	0	0	0	0	0	0	0	2	0	0	0	2	0	0
Otu0845	0	0	0	0	0	0	0	0	0	0	0	0	0	0	0	0	0	0	0	0	0	0	0	0	0	0	0	0	0	4	0	0	0	0	0	0	0	2	4	0	0	5	0	0	0	0	0	0	0
Otu0846	0	0	0	0	0	0	0	0	0	16	0	0	0	0	0	0	0	0	0	0	0	0	0	0	0	0	0	0	0	0	0	0	0	0	0	0	0	0	0	0	0	0	0	0	0	0	0	0	0
Otu0847	6	0	0	0	7	0	0	0	0	0	0	0	0	0	0	0	0	0	0	0	0	0	0	0	0	0	0	0	0	0	0	0	0	0	0	0	0	0	0	0	0	0	0	0	0	0	0	0	0
Otu0848	0	0	0	0	0	0	0	0	0	0	0	0	0	0	0	0	0	0	0	0	0	0	0	0	3	0	0	0	2	0	0	0	0	0	0	0	0	0	0	0	0	0	0	0	0	0	0	0	0
Otu0849	0	0	0	0	0	4	1	4	0	0	0	0	0	2	0	0	0	0	0	0	0	0	0	0	0	0	0	0	0	0	0	0	1	0	0	0	0	0	0	0	0	0	0	0	0	0	0	0	0
Otu0850	0	0	0	0	0	0	0	0	0	0	0	0	0	0	0	0	0	0	0	0	0	0	0	0	0	0	0	0	0	0	0	0	0	0	0	0	0	15	0	0	0	0	0	0	0	0	0	0	0
Otu0851	0	0	0	0	0	0	0	0	0	0	0	0	0	0	0	0	0	0	0	0	0	0	0	0	0	1	0	0	0	0	0	0	0	0	0	0	0	0	0	0	0	0	0	0	0	0	0	0	0
Otu0852	0	0	0	0	0	0	0	0	0	0	0	0	0	0	0	0	0	0	0	0	0	0	0	0	0	0	0	1	0	12	0	0	0	0	0	2	0	0	0	0	0	0	0	0	0	0	0	0	0
Otu0853	0	0	0	0	0	0	0	0	0	4	0	0	0	0	0	0	0	0	0	0	0	0	0	0	0	0	0	0	0	0	0	0	1	0	0	0	0	0	0	1	0	0	0	0	0	0	7	0	0
Otu0854	0	0	0	0	0	0	0	0	0	0	0	0	0	0	0	0	0	0	0	0	0	3	3	1	0	0	0	0	0	0	0	0	0	0	0	1	0	0	0	2	0	0	0	0	0	0	0	0	0
Otu0855	0	0	0	0	0	0	0	0	0	0	0	0	0	15	0	0	0	0	0	0	0	0	0	0	0	0	0	0	0	0	0	0	0	0	0	0	0	0	0	0	0	0	0	0	0	0	0	0	0
Otu0856	0	0	0	0	0	0	0	0	0	0	0	0	0	0	0	0	0	0	0	0	0	0	0	0	0	0	0	0	0	0	0	0	0	0	0	0	0	0	0	0	0	0	1	0	2	0	4	0	0
Otu0857	0	0	0	0	0	0	0	0	0	0	15	0	0	0	0	0	0	0	0	0	0	0	0	0	0	0	0	0	0	0	0	0	0	0	0	0	0	0	0	0	0	0	0	0	0	0	0	0	0
Otu0858	0	0	0	0	0	0	0	0	0	0	0	0	0	0	0	0	0	0	0	0	0	0	0	0	0	0	0	0	0	0	0	0	0	0	0	0	0	0	0	0	0	0	2	1	0	2	0	0	0
Otu0859	0	13	0	0	0	0	0	0	0	0	0	0	0	0	0	0	0	0	0	0	0	0	0	0	0	0	0	0	0	0	0	0	1	0	0	0	0	0	0	0	0	0	0	0	0	0	0	0	0
Otu0860	0	0	0	0	0	6	0	0	5	0	0	0	0	0	0	0	0	0	0	0	0	0	0	0	0	0	0	0	0	0	0	0	0	0	0	0	1	0	0	0	0	0	0	0	0	0	0	0	0
Otu0861	0	0	0	0	0	6	0	0	0	0	0	0	0	0	0	0	0	0	9	0	0	0	0	0	0	0	0	0	0	0	0	0	0	0	0	0	0	0	0	0	0	0	0	0	0	0	0	0	0
Otu0862	0	0	0	0	0	0	0	0	0	13	0	0	0	0	1	0	0	0	0	0	0	0	0	0	0	0	0	0	0	0	0	0	0	0	0	0	0	0	1	0	0	0	0	0	0	0	0	0	0
Otu0863	0	11	0	0	0	0	1	0	0	3	0	0	0	0	0	0	0	0	0	0	0	0	0	0	0	0	0	0	0	0	0	0	0	0	0	0	0	0	0	0	0	0	0	0	0	0	0	0	0
Otu0864	0	0	0	0	0	0	0	12	0	2	0	0	0	0	0	0	0	0	0	0	1	0	0	0	0	0	0	0	0	0	0	0	0	0	0	0	0	0	0	0	0	0	0	0	0	0	0	0	0
Otu0865	0	0	0	0	0	0	0	0	0	0	0	0	0	0	0	0	0	0	0	0	0	0	0	0	0	1	0	0	4	0	0	0	0	0	0	3	0	0	2	5	0	0	0	0	0	0	0	0	0
Otu0866	0	15	0	0	0	0	0	0	0	0	0	0	0	0	0	0	0	0	0	0	0	0	0	0	0	0	0	0	0	0	0	0	0	0	0	0	0	0	0	0	0	0	0	0	0	0	0	0	0
Otu0867	0	12	0	0	0	0	0	0	0	0	0	0	0	0	0	0	0	0	3	0	0	0	0	0	0	0	0	0	0	0	0	0	0	0	0	0	0	0	0	0	0	0	0	0	0	0	0	0	0
Otu0868	0	0	0	0	0	0	0	0	0	0	0	0	0	0	0	0	0	0	0	0	0	0	0	0	0	0	0	0	0	0	0	0	0	0	0	0	0	0	0	0	0	0	0	0	0	0	0	0	0
Otu0869	0	0	0	0	0	0	0	0	0	0	0	0	0	0	0	0	0	0	0	0	0	0	0	5	1	0	0	0	0	1	0	0	1	0	0	0	0	0	1	0	0	0	0	0	0	0	0	0	0
Otu0870	0	0	0	0	0	0	0	0	0	0	0	0	0	0	0	0	0	0	0	0	0	0	0	0	0	0	0	0	0	0	0	0	0	0	0	0	0	0	0	0	0	0	0	0	2	0	0	1	0
Otu0871	0	0	0	0	0	0	0	0	0	0	0	0	0	15	0	0	0	0	0	0	0	0	0	0	0	0	0	0	0	0	0	0	0	0	0	0	0	0	0	0	0	0	0	0	0	0	0	0	0
Otu0872	0	0	0	0	0	0	0	0	0	0	0	0	0	0	0	0	0	0	0	0	0	0	0	0	0	0	0	0	0	0	0	1	0	0	0	0	0	0	0	0	0	0	0	0	0	0	0	0	0
Otu0873	0	0	0	0	0	0	0	0	0	0	0	0	0	0	0	0	0	0	0	0	0	0	0	0	0	0	0	0	0	0	0	0	0	0	0	0	0	0	0	0	0	0	0	0	0	0	1	1	0
Otu0874	0	0	0	0	0	0	0	0	0	0	0	0	15	0	0	0	0	0	0	0	0	0	0	0	0	0	0	0	0	0	0	0	0	0	0	0	0	0	0	0	0	0	0	0	0	0	0	0	0
Otu0875	0	0	0	0	0	0	0	0	0	0	0	0	0	0	0	0	0	0	0	0	0	0	0	0	1	0	0	0	1	0	0	1	0	0	0	0	1	7	0	0	0	0	0	0	0	0	0	0	0
Otu0876	0	0	0	0	0	0	0	0	0	0	0	0	0	0	0	0	0	0	0	0	0	0	0	0	0	0	0	0	0	0	0	0	0	0	0	0	0	0	0	0	0	0	0	0	0	0	0	0	0
Otu0877	0	15	0	0	0	0	0	0	0	0	0	0	0	0	0	0	0	0	0	0	0	0	0	0	0	0	0	0	0	0	0	0	0	0	0	0	0	0	0	0	0	0	0	0	0	0	0	0	0
Otu0878	1	0	0	0	0	0	1	12	0	0	0	0	0	0	0	1	0	0	0	0	0	0	0	0	0	0	0	0	0	0	0	0	0	0	0	0	0	0	0	0	0	0	0	0	0	0	0	0	0
Otu0879	0	0	0	0	0	0	0	0	0	0	0	0	0	0	0	0	0	0	0	0	0	0	0	0	0	0	0	0	0	0	0	15	0	0	0	0	0	0	0	0	0	0	0	0	0	0	0	0	0
Otu0880	0	0	0	0	0	0	0	0	0	0	0	0	0	0	0	0	0	0	0	0	0	0	0	0	1	0	0	0	0	0	0	0	0	0	0	0	1	7	0	6	0	0	0	0	0	0	0	0	0
Otu0881	0	0	0	0	0	0	0	0	0	0	0	0	0	0	0	0	0	0	0	0	0	0	0	0	0	0	0	0	0	0	0	0	0	0	0	0	0	0	0	0	0	0	0	0	0	0	0	0	0
Otu0882	0	0	0	0	0	0	0	0	0	0	0	0	0	0	0	0	0	0	0	0	0	0	0	0	0	1	0	0	0	0	0	0	0	0	0	0	0	0	0	0	0	0	0	2	0	0	0	0	0
Otu0883	0	0	0	0	0	0	0	0	0	0	0	0	0	0	0	0	0	0	0	0	0	0	0	0	0	0	0	0	0	0	0	0	0	0	0	0	0	0	0	0	0	0	0	0	0	0	0	0	0
Otu0884	0	0	0	0	0	0	0	0	0	0	0	0	0	0	0	0	0	0	0	0	0	0	0	0	0	0	0	0	0	0	0	0	0	0	0	0	0	0	0	0	0	0	0	0	0	0	0	0	0
Otu0885	0	0	8	0	0	0	0	0	0	0	0	0	0	0	0	2	0	0	0	0	5	0	0	0	0	0	0	0	0	0	0	0	0	0	0	0	0	0	0	0	0	0	0	0	0	0	0	0	0
Otu0886	0	0	0	1	0	3	0	0	1	0	0	0	0	0	0	0	0	0	0	9	0	0	0	0	0	0	0	0	0	0	0	0	0	0	0	0	0	0	0	0	0	0	0	0	0	0	0	0	0
Otu0887	0	0	0	0	0	0	0	0	0	0	14	0	0	0	0	0	0	0	0	0	0	0	0	0	0	0	0	0	0	0	0	0	0	0	0	0	0	0	0	0	0	0	0	0	0	0	0	0	0
Otu0888	0	0	0	0	0	0	0	0	0	0	0	0	0	0	0	0	0	0	0	0	8	0	0	0	0	0	0	0	0	0	0	0	0	0	0	0	0	0	0	0	0	0	0	0	0	0	0	0	0
Otu0889	0	0	0	0	9	0	0	0	0	0	5	0	0	0	0	0	0	0	0	0	0	0	0	0	0	0	0	0	0	0	0	0	0	0	0	0	0	0	0	0	0	0	0	0	0	0	0	0	0
Otu0890	0	0	0	0	0	0	0	0	0	0	0	0	0	0	0	0	0	0	0	0	0	0	0	0	0	1	0	0	0	0	1	0	0	0	0	0	0	0	0	0	0	0	0	2	0	0	0	0	0
Otu0891	0	0	0	0	0	0	0	0	0	0	0	0	0	0	0	0	0	0	0	0	0	0	0	0	0	0	0	0	0	0	0	0	0	0	0	0	0	0	0	0	0	0	0	0	0	0	14	0	0
Otu0892	0	0	0	0	0	0	0	0	0	0	0	0	0	0	0	0	0	0	0	0	0	0	0	0	0	0	0	0	0	0	0	0	0	0	0	0	0	0	0	0	0	0	0	0	0	0	8	0	0
Otu0893	0	0	0	0	0	0	0	0	0	0	0	0	0	0	0	0	0	0	0	0	0	0	0	0	0	0	0	0	0	0	0	0	0	0	0	0	0	0	0	0	0	0	0	0	0	0	0	0	0
Otu0894	0	0	0	0	0	0	0	0	0	0	0	0	0	0	0	0	0	0	0	0	0	0	0	0	0	0	0	0	0	0	0	0	0	0	0	0	0	0	0	0	0	0	0	0	0	0	0	0	0
Otu0895	0	0	0	0	0	0	0	0	0	0	0	0	0	0	0	14	0	0	0	0	0	0	0	0	0	0	0	0	0	0	0	0	0	0	0	0	0	0	0	0	0	0	0	0	0	0	0	0	0
Otu0896	0	0	0	0	0	0	0	0	0	0	0	0	0	0	0	0	14	0	0	0	0	0	0	0	0	0	0	0	0	0	0	0	0	0	0	0	0	0	0	0	0	0	0	0	0	0	0	0	0
Otu0897	0	0	0	0	0	0	0	0	0	0	0	0	0	0	0	0	14	0	0	0	0	0	0	0	0	0	0	0	0	0	0	0	0	0	0	0	0	0	0	0	0	0	0	0	0	0	0	0	0
Otu0898	0	0	0	0	0	0	0	0	0	0	0	0	14	0	0	0	0	0	0	0	0	0	0	0	0	0	0	0	0	0	0	0	0	0	0	0	0	0	0	0	0	0	0	0	0	0	0	0	0
Otu0899	0	0	0	0	0	0	0	0	0	2	0	2	0	0	0	0	0	0	0	0	0	0	0	0	0	0	0	0	0	0	0	3	0	0	0	0	0	0	0	0	0	0	0	0	0	0	0	0	0
Otu0900	0	0	0	0	0	0	0	0	0	0	0	0	0	0	0	0	0	0	0	0	0	0	0	0	0	0	0	0	0	0	0	0	0	0	0	0	0	0	0	0	0	0	0	1	0	0	2	0	0
Otu0901	0	13	0	0	0	0	0	0	0	0	0	0	0	0	0	0	0	0	0	0	1	0	0	0	0	0	0	0	0	0	0	0	0	0	0	0	0	0	0	0	0	0	0	0	0	0	0	0	0
Otu0902	2	0	0	0	0	0	0	0	0	3	0	0	0	0	0	0	0	0	6	0	0	0	0	0	0	0	0	0	0	0	0	0	0	0	0	0	0	0	0	0	0	0	0	0	0	0	0	0	0
Otu0903	0	0	0	0	0	0	0	0	0	0	0	0	0	0	0	0	0	0	0	0	0	0	0	0	0	0	0	0	0	0	0	0	0	0	0	0	0	0	0	0	0	0	0	0	0	0	0	0	0
Otu0904	0	5	0	0	0	0	0	0	0	4	0	0	0	0	0	5	0	0	0	0	0	0	0	0	0	0	0	0	0	0	0	0	0	0	0	0	0	0	0	0	0	0	0	0	0	0	0	0	0
Otu0905	0	0	0	0	0	0	0	0	0	0	0	0	0	14	0	0	0	0	0	0	0	0	0	0	0	0	0	0	0	0	0	0	0	0	0	0	0	0	0	0	0	0	0	0	0	0	0	0	0
Otu0906	0	0	0	0	0	0	0	10	0	0	0	0	0	0	0	0	0	0	0	0	0	0	0	0	0	0	0	0	0	0	0	0	0	0	0	0	0	0	0	0	0	0	0	0	1	0	0	0	1
Otu0907	0	0	0	0	0	0	0	0	0	0	0	0	0	0	0	0	0	0	0	0	0	0	0	0	0	0	0	0	0	0	0	0	0	0	0	0	0	0	0	0	0	0	0	0	0	0	0	0	0
Otu0908	0	10	0	0	0	0	0	0	0	0	0	0	0	0	0	1	0	0	0	3	0	0	0	0	0	0	0	0	0	0	0	0	0	0	0	0	0	0	0	0	0	0	0	0	0	0	0	0	0
Otu0909	8	0	0	0	0	0	4	0	0	0	0	0	0	0	0	0	0	0	1	0	0	0	0	0	0	0	0	0	0	0	0	0	0	0	0	0	0	0	0	0	0	0	0	0	0	0	0	0	0
Otu0910	0	0	0	0	0	0	0	0	0	0	0	0	0	0	0	0	0	0	0	0	0	1	0	0	0	0	0	0	0	0	0	0	0	0	0	0	0	0	0	0	0	0	0	0	0	2	0	0	0
Otu0911	0	0	0	0	0	0	0	0	0	0	0	0	0	0	0	0	0	0	0	0	0	1	0	0	0	0	1	0	0	0	6	2	1	0	0	0	0	0	0	0	0	0	0	0	0	0	1	0	0
Otu0912	0	0	0	0	0	0	0	0	0	0	0	0	0	0	0	0	0	0	0	0	0	0	0	0	0	0	0	0	0	0	0	0	0	0	0	0	0	0	0	0	0	0	0	1	0	0	0	0	0
Otu0913	0	0	0	0	0	0	0	0	0	0	0	0	0	0	0	0	0	0	0	0	0	0	0	0	0	0	0	0	0	0	0	0	1	0	1	0	0	0	0	0	0	0	0	0	0	0	0	0	0
Otu0914	0	13	0	0	0	0	0	0	0	0	0	0	0	0	0	0	0	0	0	0	0	0	0	0	0	0	0	0	0	0	0	0	0	0	0	0	0	0	0	0	0	0	0	0	0	0	0	0	0
Otu0915	0	0	0	0	1	0	0	5	0	0	0	0	0	0	0	0	4	0	0	0	0	0	0	0	0	0	0	0	0	0	0	0	0	0	0	0	0	0	0	0	0	0	0	0	0	0	0	0	0
Otu0916	0	0	0	0	0	0	0	0	0	0	0	0	0	0	0	0	0	0	0	0	0	0	0	0	3	0	0	0	0	6	0	0	0	0	0	0	0	0	0	0	0	4	0	0	0	0	0	0	0
Otu0917	0	0	0	0	0	10	0	0	0	0	0	1	0	0	0	0	0	0	0	0	2	0	0	0	0	0	0	0	0	0	0	0	0	0	0	0	0	0	0	0	0	0	0	0	0	0	0	0	0
Otu0918	0	0	0	0	0	0	0	0	0	0	0	0	0	0	0	0	0	7	0	0	0	0	0	0	0	0	0	0	0	0	0	0	0	0	0	0	0	0	0	0	0	0	0	0	0	0	0	0	0
Otu0919	0	0	0	0	0	0	0	0	0	0	0	0	8	0	0	0	0	0	0	5	0	0	0	0	0	0	0	0	0	0	0	0	0	0	0	0	0	0	0	0	0	0	0	0	0	0	0	0	0
Otu0920	0	0	0	0	0	0	0	0	0	0	0	0	0	0	0	0	0	0	0	0	0	0	0	1	0	0	0	1	1	0	0	1	0	1	1	1	0	0	0	0	0	0	0	0	0	0	0	0	0
Otu0921	0	0	0	0	0	0	0	0	0	0	0	0	0	0	0	0	0	0	0	0	0	1	0	0	0	0	0	0	0	0	0	0	0	0	0	0	0	0	0	0	0	0	0	0	1	0	0	0	1
Otu0922	0	0	0	8	0	0	0	0	0	0	0	0	0	0	0	0	0	0	0	0	0	2	0	0	1	0	0	0	0	0	0	0	0	0	0	0	0	0	2	0	0	0	0	0	0	0	0	0	0
Otu0923	0	0	0	0	0	0	0	0	0	0	0	0	0	0	0	0	0	0	0	0	0	0	0	0	0	0	0	0	0	0	0	0	0	0	0	0	0	10	3	0	0	0	0	0	0	0	0	0	0
Otu0924	0	0	0	0	0	0	0	0	0	0	0	0	0	0	0	0	0	0	0	0	0	0	2	0	2	0	0	0	0	0	0	0	1	2	2	2	0	2	0	0	0	0	0	0	0	0	0	0	0
Otu0925	0	0	0	0	0	0	0	0	0	0	0	0	0	0	0	0	0	0	0	0	0	1	0	0	0	1	0	0	0	0	2	0	0	0	0	0	0	0	0	0	0	0	1	1	0	0	0	0	0
Otu0926	0	0	0	0	0	0	0	13	0	0	0	0	0	0	0	0	0	0	0	0	0	0	0	0	0	0	0	0	0	0	0	0	0	0	0	0	0	0	0	0	0	0	0	0	0	0	0	0	0
Otu0927	0	0	0	0	0	0	0	0	0	0	0	0	0	0	0	0	0	0	0	0	0	0	0	0	0	0	0	0	0	0	0	0	0	0	0	0	0	0	0	0	0	0	12	0	0	0	0	0	0
Otu0928	0	0	0	0	0	0	0	0	0	0	0	0	13	0	0	0	0	0	0	0	0	0	0	0	0	0	0	0	0	0	0	0	0	0	0	0	0	0	0	0	0	0	0	0	0	0	0	0	0
Otu0929	0	0	0	0	0	0	0	0	0	0	13	0	0	0	0	0	0	0	0	0	0	0	0	0	0	0	0	0	0	0	0	0	0	0	0	0	0	0	0	0	0	0	0	0	0	0	0	0	0
Otu0930	0	0	0	0	0	0	0	0	0	0	0	0	0	0	0	0	0	0	0	0	0	0	0	0	0	0	0	0	0	0	0	0	0	0	0	0	0	0	0	3	0	0	0	0	1	0	0	0	0
Otu0931	0	0	0	0	0	0	0	13	0	0	0	0	0	0	0	0	0	0	0	0	0	0	0	0	0	0	0	0	0	0	0	0	0	0	0	0	0	0	0	0	0	0	0	0	0	0	0	0	0
Otu0932	0	0	0	0	0	0	0	0	0	0	0	0	0	13	0	0	0	0	0	0	0	0	0	0	0	0	0	0	0	0	0	0	0	0	0	0	0	0	0	0	0	0	0	0	0	0	0	0	0
Otu0933	0	13	0	0	0	0	0	0	0	0	0	0	0	0	0	0	0	0	0	0	0	0	0	0	0	0	0	0	0	0	0	0	0	0	0	0	0	0	0	0	0	0	0	0	0	0	0	0	0
Otu0934	0	0	0	0	0	0	0	0	0	0	0	0	0	0	0	0	0	0	0	0	0	0	0	0	0	0	0	0	0	0	0	0	0	0	0	0	0	0	0	0	0	0	0	0	0	0	0	0	0
Otu0935	0	3	0	0	0	2	0	0	0	0	0	0	0	0	0	0	0	0	5	0	0	0	0	0	0	0	0	0	0	0	0	0	0	0	0	0	0	0	0	0	0	0	0	0	0	0	0	1	0
Otu0936	0	0	0	0	0	0	0	0	0	0	0	0	0	0	0	0	0	0	0	0	0	1	0	0	0	0	0	0	0	0	0	2	0	0	0	0	0	0	0	3	0	0	0	0	0	0	0	0	0
Otu0937	0	0	0	0	0	0	0	0	0	0	0	0	0	0	0	0	0	0	0	0	0	0	0	0	0	0	0	0	0	0	0	0	0	0	0	0	0	0	0	13	0	0	0	0	0	0	0	0	0
Otu0938	0	0	0	0	0	0	0	0	0	0	0	0	0	0	0	13	0	0	0	0	0	0	0	0	0	0	0	0	0	0	0	0	0	0	0	0	0	0	0	0	0	0	0	0	0	0	0	0	0
Otu0939	0	0	0	0	0	0	13	0	0	0	0	0	0	0	0	0	0	0	0	0	0	0	0	0	0	0	0	0	0	0	0	0	0	0	0	0	0	0	0	0	0	0	0	0	0	0	0	0	0
Otu0940	0	0	0	0	0	0	0	0	0	0	0	0	0	0	0	0	0	0	13	0	0	0	0	0	0	0	0	0	0	0	0	0	0	0	0	0	0	0	0	0	0	0	0	0	0	0	0	0	0
Otu0941	0	0	0	0	0	10	0	0	3	0	0	0	0	0	0	0	0	0	0	0	0	0	0	0	0	0	0	0	0	0	0	0	0	0	0	0	0	0	0	0	0	0	0	0	0	0	0	0	0
Otu0942	0	0	0	0	0	0	0	0	0	0	0	0	0	0	0	0	0	0	0	0	0	0	0	0	0	0	0	0	5	0	0	0	0	0	0	0	0	0	0	0	0	0	0	0	0	0	0	0	0
Otu0943	0	0	0	0	0	0	0	0	0	13	0	0	0	0	0	0	0	0	0	0	0	0	0	0	0	0	0	0	0	0	0	0	0	0	0	0	0	0	0	0	0	0	0	0	0	0	0	0	0
Otu0944	0	0	0	0	0	0	0	0	0	0	0	0	0	4	0	0	0	0	0	9	0	0	0	0	0	0	0	0	0	0	0	0	0	0	0	0	0	0	0	0	0	0	0	0	0	0	0	0	0
Otu0945	0	0	0	2	0	0	0	11	0	0	0	0	0	0	0	0	0	0	0	0	0	0	0	0	0	0	0	0	0	0	0	0	0	0	0	0	0	0	0	0	0	0	0	0	0	0	0	0	0
Otu0946	0	0	0	0	0	0	0	0	0	0	0	0	0	0	0	0	0	0	0	0	0	0	0	0	0	0	0	0	0	0	0	0	0	0	0	0	0	0	0	0	0	0	0	3	2	1	0	0	0
Otu0947	0	11	0	0	0	0	0	0	0	0	0	0	0	0	0	0	2	0	0	0	0	0	0	0	0	0	0	0	0	0	0	0	0	0	0	0	0	0	0	0	0	0	0	0	0	0	0	0	0
Otu0948	0	0	0	0	0	0	0	0	0	0	0	0	0	0	0	0	0	0	0	0	0	0	0	0	0	0	0	0	0	0	0	0	0	0	0	0	0	0	0	0	0	0	0	1	0	1	1	0	0
Otu0949	0	0	0	0	0	0	0	0	0	0	0	0	0	0	0	0	6	0	0	0	0	0	0	0	0	0	2	0	0	0	0	0	0	0	0	0	0	2	0	0	0	0	0	0	0	0	0	0	0
Otu0950	0	0	0	0	0	0	0	0	0	0	0	0	0	0	0	0	0	0	0	0	0	0	0	0	0	0	0	0	0	0	0	0	0	0	0	0	0	0	0	0	0	0	7	0	0	0	0	0	1
Otu0951	0	0	0	0	0	0	0	0	0	2	7	0	0	0	0	0	3	0	0	0	0	0	0	0	0	0	0	0	0	0	0	0	0	0	0	0	0	0	0	0	0	0	0	0	0	0	0	0	0
Otu0952	0	0	0	0	0	0	0	0	0	0	0	0	0	0	0	0	0	0	0	0	0	0	0	0	0	0	0	0	1	0	0	1	0	0	2	1	0	0	0	0	1	0	0	0	0	0	0	0	0
Otu0953	0	0	0	0	0	0	0	0	0	0	0	0	0	0	0	0	0	0	0	0	0	0	0	0	0	0	0	0	0	0	0	0	0	0	0	0	0	0	0	0	0	0	0	0	0	0	0	0	0
Otu0954	0	0	0	0	0	0	0	0	0	0	0	0	0	0	0	0	0	0	0	0	0	0	0	0	0	0	1	3	0	2	0	0	0	0	0	2	2	0	0	0	0	0	0	0	1	0	0	0	0
Otu0955	0	0	0	0	0	0	0	0	0	0	0	0	0	0	0	0	0	0	0	0	0	0	0	0	0	0	0	0	0	0	0	0	0	0	0	0	0	0	0	12	0	0	0	0	0	0	0	0	0
Otu0956	0	0	0	0	0	0	0	0	0	0	0	0	0	0	0	0	0	0	0	0	0	0	0	0	0	0	0	0	0	0	0	0	0	0	0	0	2	0	0	0	0	10	0	0	0	0	0	0	0
Otu0957	0	0	0	0	0	0	0	0	0	0	0	0	0	0	0	0	0	0	0	0	0	0	0	0	0	0	0	0	0	0	0	0	0	0	0	0	0	0	0	0	0	0	0	0	0	0	0	0	0
Otu0958	0	0	0	0	0	0	0	0	0	0	0	0	0	0	0	0	0	0	0	0	0	2	0	0	0	0	0	0	1	0	0	0	0	0	2	0	0	0	0	0	0	1	2	0	0	0	0	0	0
Otu0959	0	0	0	0	0	0	0	0	0	0	0	0	0	12	0	0	0	0	0	0	0	0	0	0	0	0	0	0	0	0	0	0	0	0	0	0	0	0	0	0	0	0	0	0	0	0	0	0	0
Otu0960	0	0	0	0	0	0	0	0	0	10	0	0	0	0	0	0	0	0	0	0	0	0	0	0	0	0	0	0	0	0	0	0	0	0	0	0	0	0	0	2	0	0	0	0	0	0	0	0	0
Otu0961	0	0	0	0	0	0	0	12	0	0	0	0	0	0	0	0	0	0	0	0	0	0	0	0	0	0	0	0	0	0	0	0	0	0	0	0	0	0	0	0	0	0	0	0	0	0	0	0	0
Otu0962	0	0	0	0	0	0	0	0	0	0	0	0	0	0	0	0	0	0	0	0	0	0	0	0	0	0	0	0	0	0	0	0	0	0	0	0	0	0	0	0	0	0	0	0	0	0	0	0	0
Otu0963	0	0	0	0	0	1	0	6	0	0	5	0	0	0	0	0	0	0	0	0	0	0	0	0	0	0	0	0	0	0	0	0	0	0	0	0	0	0	0	0	0	0	0	0	0	0	0	0	0
Otu0964	0	0	0	0	0	0	0	0	0	0	0	0	0	0	0	0	0	0	0	0	0	0	0	0	0	0	0	0	0	0	0	0	0	0	0	0	0	0	0	0	0	0	0	0	0	0	0	0	0
Otu0965	0	0	0	0	0	0	0	0	0	0	0	0	0	0	0	0	0	0	0	0	0	0	0	0	0	0	0	0	0	0	0	0	0	0	0	0	0	0	0	0	0	0	7	1	0	2	0	0	0
Otu0966	0	0	0	0	0	0	0	0	0	0	12	0	0	0	0	0	0	0	0	0	0	0	0	0	0	0	0	0	0	0	0	0	0	0	0	0	0	0	0	0	0	0	0	0	0	0	0	0	0
Otu0967	0	0	0	0	0	0	0	12	0	0	0	0	0	0	0	0	0	0	0	0	0	0	0	0	0	0	0	0	0	0	0	0	0	0	0	0	0	0	0	0	0	0	0	0	0	0	0	0	0
Otu0968	0	0	0	0	0	0	0	0	0	0	0	0	0	12	0	0	0	0	0	0	0	0	0	0	0	0	0	0	0	0	0	0	0	0	0	0	0	0	0	0	0	0	0	0	0	0	0	0	0
Otu0969	0	0	0	0	0	0	0	0	0	0	0	0	0	0	0	0	0	0	0	0	0	0	0	0	0	0	0	0	0	0	0	0	0	0	0	0	0	0	0	0	0	0	2	0	0	0	0	1	0
Otu0970	0	0	0	0	0	0	0	0	0	0	0	0	0	0	0	0	0	0	0	0	0	0	0	0	0	0	0	0	0	0	0	0	0	0	0	0	0	0	0	0	0	0	0	0	1	0	0	0	0
Otu0971	0	0	0	0	0	0	0	0	0	0	0	0	0	0	0	0	0	0	0	0	0	0	0	0	0	0	0	0	0	0	0	0	0	0	0	0	0	0	0	0	0	0	0	0	0	0	0	0	0
Otu0972	0	12	0	0	0	0	0	0	0	0	0	0	0	0	0	0	0	0	0	0	0	0	0	0	0	0	0	0	0	0	0	0	0	0	0	0	0	0	0	0	0	0	0	0	0	0	0	0	0
Otu0973	0	0	0	0	0	0	0	0	0	0	0	0	0	0	0	5	0	0	0	0	0	0	0	0	0	0	0	0	0	1	0	0	1	0	0	0	0	3	0	0	0	0	0	0	0	0	0	0	0
Otu0974	0	0	0	0	0	0	0	0	0	0	0	0	0	0	0	0	0	0	0	0	0	0	0	0	0	0	0	0	0	0	0	0	0	0	0	0	0	0	0	0	0	0	0	0	0	0	0	0	0
Otu0975	0	0	0	0	0	0	0	0	0	0	0	0	0	0	0	0	12	0	0	0	0	0	0	0	0	0	0	0	0	0	0	0	0	0	0	0	0	0	0	0	0	0	0	0	0	0	0	0	0
Otu0976	0	0	0	0	0	0	7	0	0	0	0	0	0	0	0	0	5	0	0	0	0	0	0	0	0	0	0	0	0	0	0	0	0	0	0	0	0	0	0	0	0	0	0	0	0	0	0	0	0
Otu0977	0	12	0	0	0	0	0	0	0	0	0	0	0	0	0	0	0	0	0	0	0	0	0	0	0	0	0	0	0	0	0	0	0	0	0	0	0	0	0	0	0	0	0	0	0	0	0	0	0
Otu0978	0	0	0	0	0	0	0	0	0	0	0	0	0	0	0	0	0	0	0	0	0	10	1	1	0	0	0	0	0	0	0	0	0	0	0	0	0	0	0	0	0	0	0	0	0	0	0	0	0
Otu0979	0	0	0	0	0	0	0	0	0	0	0	0	0	0	0	0	0	0	0	0	0	0	0	0	0	0	0	0	0	0	1	1	0	0	0	0	0	0	0	0	0	1	0	0	0	0	0	0	0
Otu0980	0	0	0	0	0	0	0	0	0	0	0	0	0	0	0	0	0	0	0	0	0	0	0	0	0	0	0	0	0	0	0	0	0	0	0	0	0	0	0	0	0	0	0	0	0	0	12	0	0
Otu0981	0	0	0	0	0	0	0	0	0	0	0	0	0	0	0	0	0	0	0	0	0	0	0	0	0	0	0	0	0	0	0	0	0	0	0	0	0	0	0	0	0	0	0	0	0	0	0	0	0
Otu0982	0	0	0	0	0	0	0	0	0	0	0	0	0	0	0	0	0	0	0	0	0	0	0	0	0	0	0	0	0	0	0	0	0	0	0	0	0	0	0	0	0	0	0	0	0	1	0	2	0
Otu0983	0	0	0	0	0	0	0	0	0	0	0	0	0	0	0	1	0	0	0	0	0	0	0	0	0	0	0	0	0	0	0	2	0	1	0	2	0	0	0	2	2	0	0	0	0	0	0	0	0
Otu0984	0	0	0	0	0	9	0	0	0	0	0	0	0	0	0	0	0	0	0	0	0	0	0	0	0	0	0	0	0	0	0	0	0	0	0	0	0	0	0	0	0	0	0	0	0	0	0	0	0
Otu0985	0	0	0	0	0	0	0	8	0	0	0	0	0	0	0	3	0	0	0	0	0	0	0	0	0	0	0	0	0	0	0	0	0	0	0	0	0	0	0	0	0	0	0	0	0	0	0	0	0
Otu0986	0	0	0	0	0	0	0	0	0	0	11	0	0	0	0	0	0	0	0	0	0	0	0	0	0	0	0	0	0	0	0	0	0	0	0	0	0	0	0	0	0	0	0	0	0	0	0	0	0
Otu0987	0	0	0	0	0	0	0	0	0	0	0	0	0	0	0	11	0	0	0	0	0	0	0	0	0	0	0	0	0	0	0	0	0	0	0	0	0	0	0	0	0	0	0	0	0	0	0	0	0
Otu0988	0	0	0	0	0	0	0	0	0	0	0	0	0	0	0	0	0	0	0	0	0	1	0	0	0	0	0	0	0	1	2	0	1	0	0	0	5	1	0	0	0	0	0	0	0	0	0	0	0
Otu0989	0	0	0	0	0	0	0	0	0	0	0	0	0	0	0	0	0	0	0	0	0	0	0	0	0	0	0	0	0	0	0	0	0	0	0	0	0	0	0	0	0	0	0	0	0	0	0	0	0
Otu0990	0	0	0	0	0	0	0	0	0	0	0	0	0	0	0	0	0	0	0	0	0	0	0	0	0	0	0	0	0	0	0	0	0	0	0	0	1	2	1	7	0	0	0	0	0	0	0	0	0
Otu0991	0	0	0	0	0	0	0	0	0	0	0	0	0	0	0	0	0	0	0	0	0	0	0	0	0	0	0	0	0	0	0	0	0	0	0	0	0	0	0	0	0	0	0	0	0	0	11	0	0
Otu0992	0	0	0	5	0	0	0	0	0	0	0	0	0	0	0	0	0	0	0	0	0	2	0	1	1	0	0	0	0	0	0	0	0	0	0	0	0	2	0	0	0	0	0	0	0	0	0	0	0
Otu0993	0	0	0	0	0	0	0	0	0	0	0	0	0	0	0	0	0	0	0	0	11	0	0	0	0	0	0	0	0	0	0	0	0	0	0	0	0	0	0	0	0	0	0	0	0	0	0	0	0
Otu0994	1	0	0	1	0	0	0	0	0	0	8	0	0	0	0	0	1	0	0	0	0	0	0	0	0	0	0	0	0	0	0	0	0	0	0	0	0	0	0	0	0	0	0	0	0	0	0	0	0
Otu0995	0	0	0	0	0	0	0	0	0	0	11	0	0	0	0	0	0	0	0	0	0	0	0	0	0	0	0	0	0	0	0	0	0	0	0	0	0	0	0	0	0	0	0	0	0	0	0	0	0
Otu0996	0	0	0	0	0	0	0	0	0	0	0	0	0	0	0	0	0	0	0	0	0	1	0	0	0	0	0	1	0	0	0	0	0	0	0	1	0	1	0	0	0	0	6	0	0	0	0	0	0
Otu0997	0	0	0	0	0	0	0	0	0	0	2	0	0	0	0	9	0	0	0	0	0	0	0	0	0	0	0	0	0	0	0	0	0	0	0	0	0	0	0	0	0	0	0	0	0	0	0	0	0
Otu0998	0	0	0	0	0	0	0	0	0	0	0	0	0	0	0	0	0	0	0	0	0	0	4	2	2	0	0	0	0	0	0	0	1	0	0	0	0	1	0	0	0	0	0	0	0	0	0	0	0
Otu0999	0	0	0	0	0	0	0	0	0	11	0	0	0	0	0	0	0	0	0	0	0	0	0	0	0	0	0	0	0	0	0	0	0	0	0	0	0	0	0	0	0	0	0	0	0	0	0	0	0
Otu1000	0	8	0	0	0	0	0	0	0	0	0	0	0	0	0	0	0	0	0	0	0	0	0	0	0	0	0	0	0	0	0	0	0	0	0	0	0	0	0	0	0	0	0	0	1	0	0	0	0
Otu1001	0	0	0	0	0	0	0	0	0	0	0	0	0	0	0	0	0	0	0	0	0	0	0	0	0	0	0	0	0	0	0	0	0	0	2	0	0	0	1	0	0	0	0	0	0	0	0	0	0
Otu1002	0	0	0	0	0	0	0	0	0	0	0	0	0	0	0	0	0	0	0	0	0	0	0	0	0	0	0	0	0	0	0	0	0	0	5	0	0	0	0	0	0	0	6	0	0	0	0	0	0
Otu1003	0	0	0	0	0	0	0	0	0	0	0	0	0	0	0	0	0	0	0	0	0	0	0	0	0	0	0	0	0	0	0	0	0	0	0	0	0	0	0	0	0	0	0	0	11	0	0	0	0
Otu1004	0	0	0	0	0	0	0	0	0	0	0	0	0	0	0	0	0	0	0	0	0	0	0	0	0	0	0	0	0	0	0	0	0	0	0	0	0	0	0	0	0	0	0	0	0	0	0	0	0
Otu1005	0	0	0	0	0	0	0	0	0	0	0	0	0	0	0	0	0	0	0	0	0	0	0	0	0	0	0	0	0	0	0	0	0	0	0	0	0	0	0	0	0	0	5	0	0	0	0	0	0
Otu1006	0	0	0	0	0	0	0	0	0	0	0	0	0	0	0	0	0	0	0	0	0	0	0	0	0	0	0	0	0	0	0	0	0	0	0	0	0	0	0	0	0	0	0	0	0	0	2	0	0
Otu1007	0	0	0	0	0	0	0	0	0	0	0	0	0	0	0	0	0	0	0	0	0	0	0	0	0	0	0	0	0	0	0	0	0	0	0	0	0	0	0	0	0	0	0	0	0	0	11	0	0
Otu1008	0	11	0	0	0	0	0	0	0	0	0	0	0	0	0	0	0	0	0	0	0	0	0	0	0	0	0	0	0	0	0	0	0	0	0	0	0	0	0	0	0	0	0	0	0	0	0	0	0
Otu1009	0	0	0	0	0	0	0	0	0	0	0	0	0	0	0	0	0	0	0	0	0	0	4	0	0	0	0	0	2	0	0	0	1	1	0	0	0	2	0	0	0	0	0	0	0	0	1	0	0
Otu1010	0	0	0	0	0	0	0	0	0	0	0	0	0	0	0	0	0	0	0	0	0	0	0	0	0	0	0	0	0	0	0	11	0	0	0	0	0	0	0	0	0	0	0	0	0	0	0	0	0
Otu1011	0	0	0	0	0	0	0	0	0	0	0	0	0	0	0	0	0	0	0	0	0	0	0	0	0	0	0	0	0	0	0	0	0	0	0	0	0	0	0	0	0	0	0	0	0	0	0	0	0
Otu1012	0	0	0	0	0	0	0	0	0	0	0	0	0	0	0	0	0	0	0	0	0	0	0	0	0	1	0	0	0	0	0	0	0	0	0	0	0	0	0	0	0	0	0	0	0	0	0	0	0
Otu1013	0	0	4	0	0	2	0	0	0	0	0	0	0	0	1	0	0	1	0	0	0	0	0	0	0	0	0	0	0	0	0	0	0	0	0	0	0	0	0	0	0	0	0	0	0	0	0	0	0
Otu1014	0	0	0	0	0	0	0	0	0	0	0	0	0	0	0	0	11	0	0	0	0	0	0	0	0	0	0	0	0	0	0	0	0	0	0	0	0	0	0	0	0	0	0	0	0	0	0	0	0
Otu1015	0	0	0	0	0	0	0	0	0	0	0	0	0	0	0	0	0	0	0	0	0	4	0	0	0	0	0	0	0	0	0	0	0	1	0	0	0	0	0	0	0	0	0	0	0	0	0	0	0
Otu1016	0	0	0	0	0	0	0	0	0	0	0	0	0	0	0	0	0	0	0	0	0	0	0	0	0	0	0	0	0	0	0	0	0	0	0	0	0	0	0	0	0	0	0	0	0	0	0	0	0
Otu1017	0	6	0	0	0	0	5	0	0	0	0	0	0	0	0	0	0	0	0	0	0	0	0	0	0	0	0	0	0	0	0	0	0	0	0	0	0	0	0	0	0	0	0	0	0	0	0	0	0
Otu1018	0	0	0	0	0	0	0	5	0	4	0	0	0	0	0	2	0	0	0	0	0	0	0	0	0	0	0	0	0	0	0	0	0	0	0	0	0	0	0	0	0	0	0	0	0	0	0	0	0
Otu1019	0	0	0	0	0	0	0	0	0	0	0	0	0	0	0	0	0	0	0	0	0	1	0	0	0	0	0	0	0	0	0	0	0	0	0	0	0	1	4	0	0	5	0	0	0	0	0	0	0
Otu1020	0	0	0	0	0	0	0	0	0	0	0	0	0	0	0	0	0	0	0	0	0	0	0	0	0	0	0	0	0	0	0	0	0	0	0	0	0	0	0	0	0	0	0	3	0	0	5	0	0
Otu1021	0	0	0	0	0	0	0	0	0	0	0	0	0	0	0	0	0	0	0	0	0	0	0	0	1	0	0	0	0	0	0	0	0	0	0	0	0	0	0	0	0	0	0	0	0	0	0	0	0
Otu1022	0	0	0	0	0	0	0	0	0	0	0	0	0	0	0	0	0	0	0	0	0	0	0	0	0	0	0	0	0	0	0	0	0	0	0	0	0	0	0	0	0	0	0	0	1	0	0	0	0
Otu1023	0	0	0	0	0	0	11	0	0	0	0	0	0	0	0	0	0	0	0	0	0	0	0	0	0	0	0	0	0	0	0	0	0	0	0	0	0	0	0	0	0	0	0	0	0	0	0	0	0
Otu1024	0	0	0	0	0	0	0	0	0	0	0	0	0	0	0	0	0	0	0	0	0	0	0	0	0	0	0	0	0	0	0	0	0	0	0	0	0	0	0	0	0	0	0	0	0	11	0	0	0
Otu1025	0	0	0	0	0	0	0	0	0	0	11	0	0	0	0	0	0	0	0	0	0	0	0	0	0	0	0	0	0	0	0	0	0	0	0	0	0	0	0	0	0	0	0	0	0	0	0	0	0
Otu1026	0	0	0	0	0	0	0	0	0	0	0	0	0	0	0	0	0	1	0	0	0	0	0	0	2	0	0	0	0	0	0	0	0	0	0	0	0	0	1	0	2	2	0	0	0	0	0	0	0
Otu1027	0	0	0	0	0	0	0	0	0	0	0	0	0	0	0	0	0	0	0	0	0	0	0	0	0	0	0	0	1	0	0	0	0	0	0	0	0	8	0	0	0	0	0	0	0	0	0	0	0
Otu1028	0	0	0	0	0	0	0	0	0	0	0	0	0	0	0	0	0	0	0	0	0	0	0	0	0	0	0	0	0	0	0	0	0	0	0	0	0	0	0	0	0	0	0	0	0	0	0	0	0
Otu1029	0	10	0	0	0	0	0	0	0	0	0	0	0	0	0	0	0	0	0	0	0	0	0	0	0	0	0	0	0	0	0	0	0	0	0	0	0	0	0	0	0	0	0	0	0	0	0	0	0
Otu1030	0	0	0	0	1	0	0	0	0	0	0	0	0	0	0	0	8	0	0	0	0	0	0	0	0	0	0	0	0	0	0	0	0	0	0	0	0	0	0	0	0	0	1	0	0	0	0	0	0
Otu1031	0	0	0	1	0	0	8	0	0	0	0	0	0	0	0	0	0	0	0	0	0	0	0	0	0	0	0	0	0	0	0	0	0	0	0	0	0	0	0	0	0	0	0	0	0	0	0	0	0
Otu1032	0	0	0	0	0	0	0	0	0	0	0	0	0	0	0	0	0	0	0	0	0	0	0	0	0	0	0	0	0	0	0	10	0	0	0	0	0	0	0	0	0	0	0	0	0	0	0	0	0
Otu1033	0	0	0	0	0	0	0	0	0	0	0	0	0	0	0	0	0	0	0	0	0	0	0	0	0	0	0	0	0	0	0	0	0	0	0	0	0	0	0	0	0	0	0	0	0	0	0	0	0
Otu1034	0	9	0	1	0	0	0	0	0	0	0	0	0	0	0	0	0	0	0	0	0	0	0	0	0	0	0	0	0	0	0	0	0	0	0	0	0	0	0	0	0	0	0	0	0	0	0	0	0
Otu1035	0	0	0	0	0	7	0	0	0	0	0	1	0	0	0	0	0	0	0	0	0	0	0	0	0	0	0	0	0	0	0	0	0	0	0	0	0	0	0	0	0	0	0	0	0	0	0	0	0
Otu1036	0	0	0	0	0	0	0	0	0	0	0	0	0	0	0	0	0	0	0	0	0	0	0	0	0	0	0	0	0	0	0	0	0	0	0	0	0	0	0	0	0	0	0	0	0	0	0	0	0
Otu1037	0	0	0	0	0	0	0	0	0	8	0	0	0	0	0	0	0	0	0	0	0	0	0	0	0	0	0	0	0	0	0	0	0	0	0	0	0	0	0	2	0	0	0	0	0	0	0	0	0
Otu1038	0	0	0	0	0	0	0	0	0	0	0	0	0	0	0	0	0	0	10	0	0	0	0	0	0	0	0	0	0	0	0	0	0	0	0	0	0	0	0	0	0	0	0	0	0	0	0	0	0
Otu1039	0	0	0	0	0	0	0	0	0	0	0	0	0	0	0	0	0	0	0	0	0	0	0	0	0	0	0	0	0	0	0	0	0	0	0	0	0	0	0	10	0	0	0	0	0	0	0	0	0
Otu1040	0	0	0	0	0	0	0	0	0	0	0	0	0	0	0	0	0	0	0	0	0	0	0	0	0	0	0	0	0	0	0	10	0	0	0	0	0	0	0	0	0	0	0	0	0	0	0	0	0
Otu1041	0	0	0	0	0	0	0	0	0	0	0	0	0	0	0	0	0	0	0	0	0	0	0	0	0	0	0	0	0	0	0	0	0	0	0	0	0	0	0	0	0	0	0	0	0	0	10	0	0
Otu1042	0	0	0	0	0	0	0	0	0	0	0	0	0	0	0	0	0	0	0	0	0	0	0	0	5	0	0	0	3	1	0	0	0	1	0	0	0	0	0	0	0	0	0	0	0	0	0	0	0
Otu1043	0	0	0	0	0	0	0	0	0	0	0	0	0	0	0	0	0	0	0	0	0	0	0	0	0	1	0	0	0	0	0	0	1	0	4	0	0	0	0	0	0	0	0	0	0	0	0	0	0
Otu1044	0	0	0	0	0	0	0	0	0	0	0	0	10	0	0	0	0	0	0	0	0	0	0	0	0	0	0	0	0	0	0	0	0	0	0	0	0	0	0	0	0	0	0	0	0	0	0	0	0
Otu1045	0	0	0	0	0	0	0	0	0	0	0	0	0	0	0	0	0	0	0	0	0	0	0	0	0	0	0	0	0	0	0	0	0	0	0	0	0	0	0	0	0	0	0	0	0	0	0	0	0
Otu1046	0	0	0	0	2	0	0	0	0	0	0	0	0	0	0	0	1	0	0	1	0	0	0	0	0	0	0	0	0	0	0	0	0	0	0	0	0	0	0	0	0	0	0	0	0	0	0	0	0
Otu1047	0	0	0	0	0	0	0	0	0	0	0	0	0	0	0	0	0	0	0	0	0	0	0	0	0	0	0	0	0	0	0	0	0	0	0	0	0	0	0	0	0	0	0	0	0	0	0	0	0
Otu1048	0	0	0	0	0	0	0	0	0	0	0	0	0	0	0	0	0	0	0	0	0	1	0	0	0	0	0	0	0	0	0	0	0	0	0	0	0	1	0	0	0	0	0	0	0	0	0	1	0
Otu1049	0	0	0	0	0	0	0	0	0	0	10	0	0	0	0	0	0	0	0	0	0	0	0	0	0	0	0	0	0	0	0	0	0	0	0	0	0	0	0	0	0	0	0	0	0	0	0	0	0
Otu1050	0	0	0	0	5	0	0	0	0	0	0	0	0	0	0	0	0	0	5	0	0	0	0	0	0	0	0	0	0	0	0	0	0	0	0	0	0	0	0	0	0	0	0	0	0	0	0	0	0
Otu1051	0	0	0	0	0	0	0	0	0	0	0	0	0	0	0	0	0	0	0	0	0	1	0	0	0	0	0	0	0	0	0	0	0	0	0	0	0	0	0	6	0	0	3	0	0	0	0	0	0
Otu1052	0	0	0	0	0	0	0	0	0	0	0	0	0	0	0	0	0	0	0	10	0	0	0	0	0	0	0	0	0	0	0	0	0	0	0	0	0	0	0	0	0	0	0	0	0	0	0	0	0
Otu1053	0	10	0	0	0	0	0	0	0	0	0	0	0	0	0	0	0	0	0	0	0	0	0	0	0	0	0	0	0	0	0	0	0	0	0	0	0	0	0	0	0	0	0	0	0	0	0	0	0
Otu1054	0	0	0	0	0	0	0	0	0	0	0	0	10	0	0	0	0	0	0	0	0	0	0	0	0	0	0	0	0	0	0	0	0	0	0	0	0	0	0	0	0	0	0	0	0	0	0	0	0
Otu1055	0	0	0	0	0	0	0	0	0	1	0	0	0	0	0	0	0	0	0	0	0	0	0	0	0	0	0	0	0	0	0	0	0	0	0	0	0	0	0	0	0	0	0	0	0	0	0	0	0
Otu1056	0	0	0	0	0	0	0	0	0	1	0	0	0	0	0	0	0	0	0	0	0	0	0	0	0	0	0	0	0	0	0	0	0	0	0	0	0	0	0	0	0	0	0	0	0	0	0	0	0
Otu1057	0	10	0	0	0	0	0	0	0	0	0	0	0	0	0	0	0	0	0	0	0	0	0	0	0	0	0	0	0	0	0	0	0	0	0	0	0	0	0	0	0	0	0	0	0	0	0	0	0
Otu1058	0	0	0	0	0	0	0	0	0	0	0	0	0	0	0	0	0	0	0	0	0	0	0	0	0	0	0	0	0	0	0	8	0	0	0	0	0	0	0	2	0	0	0	0	0	0	0	0	0
Otu1059	0	0	0	0	0	0	0	0	0	0	7	0	0	0	0	0	0	0	3	0	0	0	0	0	0	0	0	0	0	0	0	0	0	0	0	0	0	0	0	0	0	0	0	0	0	0	0	0	0
Otu1060	0	1	0	0	0	0	0	0	0	0	0	0	0	5	0	3	0	0	0	0	0	0	0	0	0	0	0	0	0	0	0	0	0	0	0	0	0	0	0	0	0	0	0	0	0	0	0	0	0
Otu1061	0	0	0	0	0	0	10	0	0	0	0	0	0	0	0	0	0	0	0	0	0	0	0	0	0	0	0	0	0	0	0	0	0	0	0	0	0	0	0	0	0	0	0	0	0	0	0	0	0
Otu1062	0	0	0	0	0	0	0	0	0	0	0	0	0	0	0	0	0	0	0	0	0	0	0	0	0	0	0	0	0	0	0	0	0	0	0	0	0	0	0	0	0	0	10	0	0	0	0	0	0
Otu1063	0	0	0	0	0	0	0	0	0	0	0	0	0	0	0	0	10	0	0	0	0	0	0	0	0	0	0	0	0	0	0	0	0	0	0	0	0	0	0	0	0	0	0	0	0	0	0	0	0
Otu1064	0	7	0	0	0	0	0	0	0	0	0	0	0	0	0	0	2	0	0	0	1	0	0	0	0	0	0	0	0	0	0	0	0	0	0	0	0	0	0	0	0	0	0	0	0	0	0	0	0
Otu1065	0	0	0	0	0	0	0	0	0	0	0	0	0	0	0	0	0	0	0	0	0	0	0	0	0	0	0	0	0	0	0	1	0	0	0	0	0	0	0	0	0	0	0	0	0	0	0	0	0
Otu1066	0	0	0	0	0	0	0	0	0	0	0	0	0	0	0	0	0	0	0	0	0	0	0	0	1	0	0	0	0	0	0	0	2	0	4	0	0	0	1	0	0	0	0	0	0	0	0	0	0
Otu1067	0	0	0	0	0	0	0	0	0	0	0	0	0	0	0	10	0	0	0	0	0	0	0	0	0	0	0	0	0	0	0	0	0	0	0	0	0	0	0	0	0	0	0	0	0	0	0	0	0
Otu1068	0	0	0	0	0	0	0	0	0	0	0	0	0	0	0	0	0	0	0	0	0	0	0	0	0	0	0	0	0	0	0	10	0	0	0	0	0	0	0	0	0	0	0	0	0	0	0	0	0
Otu1069	0	0	0	0	0	0	0	0	0	0	0	0	0	0	0	0	0	0	0	0	0	0	0	0	0	0	0	0	0	0	0	0	0	0	0	0	0	0	0	0	0	0	0	2	0	0	0	1	0
Otu1070	0	0	0	0	0	0	0	0	0	0	0	0	0	0	0	0	0	2	0	0	0	0	0	0	4	0	0	1	0	0	0	0	0	0	1	0	1	0	0	0	0	0	0	0	0	0	0	0	0
Otu1071	0	0	0	0	0	0	0	10	0	0	0	0	0	0	0	0	0	0	0	0	0	0	0	0	0	0	0	0	0	0	0	0	0	0	0	0	0	0	0	0	0	0	0	0	0	0	0	0	0
Otu1072	0	0	0	0	0	0	0	0	0	0	0	0	0	0	0	0	0	0	0	0	0	0	0	0	0	0	0	0	0	0	0	0	3	0	0	0	0	0	0	0	0	0	0	0	0	0	0	0	0
Otu1073	0	0	0	0	0	0	0	0	0	0	0	0	0	0	0	0	0	1	0	0	1	2	0	0	0	0	0	2	0	0	2	0	0	1	0	0	0	0	0	0	0	0	0	0	0	0	0	0	0
Otu1074	0	9	0	0	0	0	0	0	0	0	0	0	0	0	0	0	0	0	0	0	0	0	0	0	0	0	0	0	0	0	0	0	0	0	0	0	0	0	0	0	0	0	0	0	0	0	0	0	0
Otu1075	0	0	0	0	0	0	9	0	0	0	0	0	0	0	0	0	0	0	0	0	0	0	0	0	0	0	0	0	0	0	0	0	0	0	0	0	0	0	0	0	0	0	0	0	0	0	0	0	0
Otu1076	0	0	0	0	0	0	0	0	0	0	0	0	0	0	0	0	0	0	0	0	0	0	0	0	0	0	0	0	0	1	0	0	0	0	0	0	3	3	0	0	0	1	0	0	0	0	0	0	0
Otu1077	1	0	0	0	0	0	7	0	0	0	0	0	0	0	0	0	0	0	0	0	1	0	0	0	0	0	0	0	0	0	0	0	0	0	0	0	0	0	0	0	0	0	0	0	0	0	0	0	0
Otu1078	0	0	0	0	0	0	0	0	0	9	0	0	0	0	0	0	0	0	0	0	0	0	0	0	0	0	0	0	0	0	0	0	0	0	0	0	0	0	0	0	0	0	0	0	0	0	0	0	0
Otu1079	0	0	0	0	0	0	0	7	0	0	0	0	0	0	0	0	0	0	2	0	0	0	0	0	0	0	0	0	0	0	0	0	0	0	0	0	0	0	0	0	0	0	0	0	0	0	0	0	0
Otu1080	0	0	0	1	0	0	2	0	0	0	0	0	0	4	0	0	2	0	0	0	0	0	0	0	0	0	0	0	0	0	0	0	0	0	0	0	0	0	0	0	0	0	0	0	0	0	0	0	0
Otu1081	0	0	0	0	0	0	0	0	0	0	0	0	0	0	0	0	0	0	0	0	0	0	0	0	0	0	1	0	0	0	0	0	0	0	0	0	0	0	0	0	0	0	0	0	1	0	0	3	0
Otu1082	0	0	0	0	0	0	0	0	0	0	0	0	0	0	0	0	0	0	0	0	0	0	0	0	0	0	0	0	0	0	0	0	0	0	0	0	0	0	0	0	0	0	0	0	0	0	0	0	0
Otu1083	2	0	2	0	0	0	4	0	0	0	0	0	0	0	0	1	0	0	0	0	0	0	0	0	0	0	0	0	0	0	0	0	0	0	0	0	0	0	0	0	0	0	0	0	0	0	0	0	0
Otu1084	0	6	0	0	0	0	0	0	0	0	0	0	0	0	0	0	0	0	0	0	0	0	0	0	0	0	0	0	0	0	0	2	0	0	1	0	0	0	0	0	0	0	0	0	0	0	0	0	0
Otu1085	1	0	0	4	0	0	4	0	0	0	0	0	0	0	0	0	0	0	0	0	0	0	0	0	0	0	0	0	0	0	0	0	0	0	0	0	0	0	0	0	0	0	0	0	0	0	0	0	0
Otu1086	0	0	0	0	0	0	0	0	0	0	0	0	0	0	0	0	0	0	0	0	0	0	5	0	0	0	0	0	4	0	0	0	0	0	0	0	0	0	0	0	0	0	0	0	0	0	0	0	0
Otu1087	0	0	0	0	0	0	0	0	0	9	0	0	0	0	0	0	0	0	0	0	0	0	0	0	0	0	0	0	0	0	0	0	0	0	0	0	0	0	0	0	0	0	0	0	0	0	0	0	0
Otu1088	3	0	0	0	0	3	0	0	0	0	0	0	2	0	0	0	1	0	0	0	0	0	0	0	0	0	0	0	0	0	0	0	0	0	0	0	0	0	0	0	0	0	0	0	0	0	0	0	0
Otu1089	0	0	0	0	0	0	0	0	0	0	0	0	0	0	0	0	0	0	0	0	0	0	0	0	0	0	0	0	0	0	0	0	0	0	0	0	0	0	0	0	0	0	0	0	0	0	0	0	0
Otu1090	0	0	0	0	0	0	0	0	0	0	0	0	0	9	0	0	0	0	0	0	0	0	0	0	0	0	0	0	0	0	0	0	0	0	0	0	0	0	0	0	0	0	0	0	0	0	0	0	0
Otu1091	0	0	0	0	0	0	0	0	0	0	0	0	0	0	0	2	0	0	0	0	0	0	0	0	0	0	0	0	0	0	0	0	0	0	0	0	0	0	0	0	0	0	0	0	0	0	0	0	0
Otu1092	0	0	0	0	0	0	0	0	0	3	0	0	0	0	0	0	0	0	0	0	0	0	0	0	0	0	0	0	0	0	0	0	0	0	0	0	0	0	0	0	0	0	0	6	0	0	0	0	0
Otu1093	0	0	0	0	0	0	0	0	4	0	0	0	0	0	2	0	0	0	0	0	2	0	0	0	0	0	0	0	0	0	0	0	0	0	0	0	0	0	0	0	0	0	0	0	0	0	0	0	0
Otu1094	0	0	0	0	0	0	0	0	1	0	0	0	0	0	3	0	0	0	0	0	0	0	0	1	0	0	1	0	0	1	0	0	0	0	0	0	0	1	0	0	0	0	0	0	0	0	0	0	0
Otu1095	0	0	0	0	0	0	0	0	0	0	0	0	0	0	0	0	0	0	0	0	0	0	0	0	0	0	0	0	0	0	0	0	0	0	0	0	0	0	0	0	0	0	0	0	0	0	0	0	0
Otu1096	0	0	0	0	0	0	6	0	0	0	0	0	0	0	0	0	2	0	1	0	0	0	0	0	0	0	0	0	0	0	0	0	0	0	0	0	0	0	0	0	0	0	0	0	0	0	0	0	0
Otu1097	0	0	0	0	0	0	0	0	0	0	0	0	0	0	0	0	0	0	0	0	0	0	0	0	0	0	0	0	0	0	0	0	0	0	4	0	0	0	0	0	0	0	0	0	0	0	0	0	0
Otu1098	0	0	0	0	0	0	0	9	0	0	0	0	0	0	0	0	0	0	0	0	0	0	0	0	0	0	0	0	0	0	0	0	0	0	0	0	0	0	0	0	0	0	0	0	0	0	0	0	0
Otu1099	0	0	0	0	0	0	0	0	0	0	0	0	0	0	0	0	0	0	0	0	0	0	0	0	0	0	0	0	0	0	0	0	0	0	0	0	0	0	0	0	0	0	0	2	1	0	0	0	0
Otu1100	0	0	0	0	0	0	0	0	0	0	0	0	0	0	0	0	0	0	0	0	0	0	0	0	0	0	0	0	0	0	0	0	0	0	0	0	0	0	0	0	0	0	0	0	0	0	0	0	0
Otu1101	0	0	0	0	0	0	0	9	0	0	0	0	0	0	0	0	0	0	0	0	0	0	0	0	0	0	0	0	0	0	0	0	0	0	0	0	0	0	0	0	0	0	0	0	0	0	0	0	0
Otu1102	0	0	0	0	0	2	0	0	0	0	0	0	0	0	0	0	0	0	0	0	0	0	0	0	0	0	0	0	0	0	0	0	0	0	0	0	0	0	0	0	0	0	0	0	0	0	0	0	0
Otu1103	0	0	0	0	0	0	0	0	0	0	0	0	0	0	0	0	0	0	0	0	0	0	0	0	0	0	0	0	0	0	0	0	0	0	0	0	0	0	0	0	0	0	0	0	0	0	0	0	0
Otu1104	0	0	0	0	0	0	0	0	0	0	5	0	0	0	0	0	0	0	4	0	0	0	0	0	0	0	0	0	0	0	0	0	0	0	0	0	0	0	0	0	0	0	0	0	0	0	0	0	0
Otu1105	0	0	0	0	0	0	0	0	0	0	0	0	9	0	0	0	0	0	0	0	0	0	0	0	0	0	0	0	0	0	0	0	0	0	0	0	0	0	0	0	0	0	0	0	0	0	0	0	0
Otu1106	0	0	0	0	0	0	0	0	0	0	9	0	0	0	0	0	0	0	0	0	0	0	0	0	0	0	0	0	0	0	0	0	0	0	0	0	0	0	0	0	0	0	0	0	0	0	0	0	0
Otu1107	0	0	0	0	0	0	0	0	0	0	0	0	0	0	0	0	0	0	0	0	0	0	0	0	0	0	0	0	0	0	0	0	0	0	0	0	0	0	0	9	0	0	0	0	0	0	0	0	0
Otu1108	0	0	0	0	0	0	0	0	0	0	0	0	0	0	0	0	0	0	0	0	0	0	0	0	0	0	0	0	0	0	0	0	0	0	0	0	0	0	0	9	0	0	0	0	0	0	0	0	0
Otu1109	0	0	0	0	0	0	0	0	0	0	0	0	0	0	0	0	0	0	0	0	0	0	0	0	0	0	0	0	0	0	0	0	0	0	0	0	0	0	0	0	0	0	0	0	0	0	0	0	0
Otu1110	0	0	0	0	0	0	0	0	0	0	0	0	0	0	0	0	0	0	0	0	0	0	0	0	0	0	0	0	0	0	0	0	0	0	0	0	0	0	0	0	0	0	0	0	0	0	0	0	0
Otu1111	0	0	0	0	0	0	0	0	0	0	0	0	0	0	0	0	0	0	0	0	0	0	0	0	0	0	0	0	0	0	0	0	0	0	0	0	0	0	0	0	0	0	0	0	0	0	0	0	0
Otu1112	0	0	0	0	0	0	0	0	0	0	0	0	0	0	0	0	9	0	0	0	0	0	0	0	0	0	0	0	0	0	0	0	0	0	0	0	0	0	0	0	0	0	0	0	0	0	0	0	0
Otu1113	0	0	0	0	0	0	0	0	0	0	0	0	0	0	0	0	0	0	0	0	0	0	0	0	0	0	0	0	0	0	0	0	0	0	0	0	0	0	0	0	0	0	0	7	0	0	0	0	0
Otu1114	0	0	0	0	0	0	0	0	0	2	0	0	7	0	0	0	0	0	0	0	0	0	0	0	0	0	0	0	0	0	0	0	0	0	0	0	0	0	0	0	0	0	0	0	0	0	0	0	0
Otu1115	0	0	0	0	0	0	0	0	0	0	0	0	0	0	0	0	0	0	0	0	0	0	0	0	0	0	0	0	0	0	0	0	0	0	0	0	0	0	0	0	0	0	0	0	0	0	0	0	0
Otu1116	2	4	0	0	0	0	0	0	0	0	0	0	0	3	0	0	0	0	0	0	0	0	0	0	0	0	0	0	0	0	0	0	0	0	0	0	0	0	0	0	0	0	0	0	0	0	0	0	0
Otu1117	0	0	0	0	0	0	0	0	0	4	0	0	5	0	0	0	0	0	0	0	0	0	0	0	0	0	0	0	0	0	0	0	0	0	0	0	0	0	0	0	0	0	0	0	0	0	0	0	0
Otu1118	0	0	0	0	0	0	0	0	0	0	0	0	0	0	0	0	0	0	0	0	0	1	0	0	0	0	0	0	0	0	0	0	0	0	0	0	0	0	0	0	0	0	1	3	0	0	0	0	0
Otu1119	0	0	0	0	0	0	0	0	0	0	0	0	0	0	0	0	0	0	0	0	0	0	0	0	0	0	0	0	0	0	0	9	0	0	0	0	0	0	0	0	0	0	0	0	0	0	0	0	0
Otu1120	0	0	0	0	0	0	0	0	0	0	0	0	0	0	0	0	0	0	0	0	0	0	0	0	0	5	0	0	0	0	0	0	0	1	2	0	0	1	0	0	0	0	0	0	0	0	0	0	0
Otu1121	0	0	0	0	0	0	0	0	0	0	0	0	0	0	0	0	0	0	0	0	0	0	0	0	0	0	0	0	0	0	0	0	0	0	0	0	0	0	0	0	0	0	0	0	1	2	0	0	0
Otu1122	0	0	0	0	0	0	0	0	0	3	6	0	0	0	0	0	0	0	0	0	0	0	0	0	0	0	0	0	0	0	0	0	0	0	0	0	0	0	0	0	0	0	0	0	0	0	0	0	0
Otu1123	0	0	2	0	0	0	0	0	0	0	0	1	0	0	0	0	0	0	0	0	0	0	0	0	0	0	0	0	0	0	0	0	1	0	0	0	0	0	0	0	0	0	0	0	0	0	0	0	0
Otu1124	0	0	0	0	0	0	0	0	0	0	9	0	0	0	0	0	0	0	0	0	0	0	0	0	0	0	0	0	0	0	0	0	0	0	0	0	0	0	0	0	0	0	0	0	0	0	0	0	0
Otu1125	0	0	0	0	0	0	0	0	0	0	0	0	0	0	0	0	0	0	0	0	0	0	0	0	0	0	0	0	0	0	0	8	0	0	0	0	0	0	0	0	0	0	0	1	0	0	0	0	0
Otu1126	0	0	0	0	0	0	0	0	0	4	0	0	0	0	0	5	0	0	0	0	0	0	0	0	0	0	0	0	0	0	0	0	0	0	0	0	0	0	0	0	0	0	0	0	0	0	0	0	0
Otu1127	0	0	0	0	0	0	0	9	0	0	0	0	0	0	0	0	0	0	0	0	0	0	0	0	0	0	0	0	0	0	0	0	0	0	0	0	0	0	0	0	0	0	0	0	0	0	0	0	0
Otu1128	0	0	0	0	0	0	0	0	0	0	0	0	0	0	0	0	9	0	0	0	0	0	0	0	0	0	0	0	0	0	0	0	0	0	0	0	0	0	0	0	0	0	0	0	0	0	0	0	0
Otu1129	0	0	0	0	0	0	0	0	0	0	0	0	9	0	0	0	0	0	0	0	0	0	0	0	0	0	0	0	0	0	0	0	0	0	0	0	0	0	0	0	0	0	0	0	0	0	0	0	0
Otu1130	0	0	0	0	0	0	0	0	0	0	0	0	0	0	0	0	0	0	0	0	0	0	0	0	0	0	0	0	0	0	0	0	0	0	0	0	0	0	0	0	0	0	2	0	0	0	1	0	0
Otu1131	0	0	0	0	0	0	0	0	0	0	0	0	0	0	0	0	0	0	0	0	0	0	0	0	0	0	0	0	0	3	0	0	0	0	0	2	0	0	0	0	0	4	0	0	0	0	0	0	0
Otu1132	0	0	1	0	0	0	0	0	0	0	0	0	7	0	0	0	0	0	0	0	0	0	0	0	0	0	0	0	0	0	0	0	0	0	0	0	0	0	0	0	0	0	0	0	0	0	0	0	0
Otu1133	0	0	0	0	0	0	0	0	0	0	0	0	0	0	0	0	0	0	0	0	0	0	0	0	0	0	1	0	0	0	0	1	0	0	0	0	0	0	0	7	0	0	0	0	0	0	0	0	0
Otu1134	0	0	0	0	0	0	0	0	0	0	0	0	0	0	0	0	0	0	0	0	0	0	0	0	0	0	0	0	0	0	0	0	0	2	0	1	0	0	0	0	1	0	0	0	0	0	0	0	1
Otu1135	0	0	0	0	0	0	0	0	0	0	0	0	2	4	0	3	0	0	0	0	0	0	0	0	0	0	0	0	0	0	0	0	0	0	0	0	0	0	0	0	0	0	0	0	0	0	0	0	0
Otu1136	0	0	0	0	0	0	0	0	0	0	0	0	0	0	0	0	0	0	0	0	0	0	0	0	0	0	0	0	0	0	0	0	0	0	0	0	0	0	0	0	0	0	0	0	0	0	0	0	0
Otu1137	0	0	0	0	0	0	0	0	0	0	0	0	0	0	0	0	0	0	0	0	0	0	0	0	0	0	0	0	0	0	0	0	0	0	1	0	0	0	0	0	0	0	0	0	0	0	0	0	0
Otu1138	0	0	0	0	0	0	0	0	0	0	0	0	0	0	0	0	0	0	0	0	0	0	0	0	0	0	0	0	0	0	0	0	0	0	0	0	0	0	0	0	0	0	0	0	0	0	0	0	0
Otu1139	0	0	0	3	0	0	0	0	0	0	0	0	0	0	0	0	0	0	0	0	0	0	0	0	0	0	0	0	0	0	0	0	0	0	0	0	0	0	0	0	0	0	0	0	0	0	0	0	0
Otu1140	0	0	0	0	0	0	0	0	0	0	0	0	0	0	0	0	0	0	0	0	0	0	0	0	0	0	0	0	0	0	0	0	0	0	0	0	0	0	0	0	0	8	0	0	0	0	0	0	0
Otu1141	0	0	0	0	0	0	0	0	0	0	0	0	0	8	0	0	0	0	0	0	0	0	0	0	0	0	0	0	0	0	0	0	0	0	0	0	0	0	0	0	0	0	0	0	0	0	0	0	0
Otu1142	0	0	0	0	0	0	0	0	0	0	0	0	0	0	0	0	0	0	0	0	0	0	0	0	0	0	0	0	0	0	0	0	0	0	0	0	0	0	0	0	0	0	7	0	0	0	1	0	0
Otu1143	0	0	0	0	0	0	0	0	0	0	0	0	8	0	0	0	0	0	0	0	0	0	0	0	0	0	0	0	0	0	0	0	0	0	0	0	0	0	0	0	0	0	0	0	0	0	0	0	0
Otu1144	0	0	0	0	0	0	0	0	0	0	0	0	0	0	0	0	0	0	0	0	0	0	0	0	0	0	0	0	0	0	0	0	0	0	0	0	0	0	0	0	0	0	0	0	0	0	0	0	0
Otu1145	0	0	0	0	0	0	0	0	0	0	0	0	0	0	0	0	8	0	0	0	0	0	0	0	0	0	0	0	0	0	0	0	0	0	0	0	0	0	0	0	0	0	0	0	0	0	0	0	0
Otu1146	0	8	0	0	0	0	0	0	0	0	0	0	0	0	0	0	0	0	0	0	0	0	0	0	0	0	0	0	0	0	0	0	0	0	0	0	0	0	0	0	0	0	0	0	0	0	0	0	0
Otu1147	0	0	0	0	0	0	0	0	0	0	8	0	0	0	0	0	0	0	0	0	0	0	0	0	0	0	0	0	0	0	0	0	0	0	0	0	0	0	0	0	0	0	0	0	0	0	0	0	0
Otu1148	0	0	0	0	0	0	0	0	0	0	0	0	0	0	0	0	0	0	0	0	0	0	0	0	0	0	0	0	6	0	0	0	0	0	0	0	0	0	0	0	0	0	0	0	0	0	0	0	0
Otu1149	0	2	0	0	0	0	0	0	0	0	0	0	0	0	0	0	6	0	0	0	0	0	0	0	0	0	0	0	0	0	0	0	0	0	0	0	0	0	0	0	0	0	0	0	0	0	0	0	0
Otu1150	0	0	0	0	0	0	0	0	0	0	0	0	0	0	0	0	0	0	0	0	0	4	0	0	0	1	0	0	0	0	1	0	1	0	0	0	0	1	0	0	0	0	0	0	0	0	0	0	0
Otu1151	0	1	0	0	3	0	0	0	0	0	0	0	0	0	0	0	0	0	0	0	0	0	0	0	0	0	0	0	0	0	0	0	0	0	0	0	0	0	0	0	0	0	1	0	0	1	0	0	0
Otu1152	0	0	0	0	0	0	0	0	0	0	0	0	0	0	0	0	0	0	0	0	0	0	3	0	1	0	0	0	0	0	0	0	0	0	0	0	0	0	0	0	0	0	0	0	0	0	0	0	0
Otu1153	0	0	0	0	0	0	0	0	0	0	0	0	0	0	0	0	0	0	0	0	0	0	0	0	0	0	0	1	0	0	0	0	0	0	0	1	5	0	0	1	0	0	0	0	0	0	0	0	0
Otu1154	0	0	0	0	0	0	0	0	0	0	0	0	0	0	0	0	0	0	0	0	0	0	0	0	0	0	0	0	0	0	0	0	0	0	0	0	0	0	0	8	0	0	0	0	0	0	0	0	0
Otu1155	0	0	0	0	0	0	0	0	0	0	0	0	0	0	0	8	0	0	0	0	0	0	0	0	0	0	0	0	0	0	0	0	0	0	0	0	0	0	0	0	0	0	0	0	0	0	0	0	0
Otu1156	0	0	0	0	0	0	0	0	0	0	0	0	0	0	0	0	0	0	0	0	0	0	0	0	0	0	0	0	0	0	0	0	0	0	1	0	0	0	7	0	0	0	0	0	0	0	0	0	0
Otu1157	0	0	0	0	0	0	0	0	0	0	8	0	0	0	0	0	0	0	0	0	0	0	0	0	0	0	0	0	0	0	0	0	0	0	0	0	0	0	0	0	0	0	0	0	0	0	0	0	0
Otu1158	0	0	0	0	0	0	0	0	0	0	0	0	0	0	0	0	0	0	0	0	0	0	0	0	0	0	0	0	0	0	0	0	0	0	0	0	0	0	0	0	0	0	0	0	0	3	0	0	0
Otu1159	0	8	0	0	0	0	0	0	0	0	0	0	0	0	0	0	0	0	0	0	0	0	0	0	0	0	0	0	0	0	0	0	0	0	0	0	0	0	0	0	0	0	0	0	0	0	0	0	0
Otu1160	0	0	0	0	0	0	0	0	0	0	0	0	0	0	0	0	0	0	0	0	0	0	0	0	0	0	0	0	0	0	1	0	0	0	0	0	0	0	0	2	2	0	0	1	0	0	1	0	0
Otu1161	0	0	0	0	0	0	0	0	2	0	0	0	0	0	4	0	0	2	0	0	0	0	0	0	0	0	0	0	0	0	0	0	0	0	0	0	0	0	0	0	0	0	0	0	0	0	0	0	0
Otu1162	0	0	0	0	3	0	2	3	0	0	0	0	0	0	0	0	0	0	0	0	0	0	0	0	0	0	0	0	0	0	0	0	0	0	0	0	0	0	0	0	0	0	0	0	0	0	0	0	0
Otu1163	0	0	0	0	0	0	0	0	0	0	0	0	0	0	0	0	0	0	0	0	0	0	0	0	0	0	0	0	0	0	0	0	0	0	0	0	0	0	0	0	0	0	0	0	0	0	0	0	0
Otu1164	0	0	0	0	0	0	0	0	0	0	0	0	0	0	0	0	0	0	0	0	0	0	0	0	0	0	0	0	0	0	0	0	0	0	0	0	0	0	0	0	0	0	0	0	0	0	8	0	0
Otu1165	0	0	0	0	0	0	0	0	0	0	0	0	0	0	0	0	0	0	0	0	0	0	0	0	4	0	0	0	0	0	0	0	0	0	0	0	0	0	0	0	0	0	0	0	0	0	1	0	0
Otu1166	0	1	0	0	0	0	0	0	0	1	1	0	5	0	0	0	0	0	0	0	0	0	0	0	0	0	0	0	0	0	0	0	0	0	0	0	0	0	0	0	0	0	0	0	0	0	0	0	0
Otu1167	0	0	0	0	0	0	0	0	0	0	0	0	0	0	0	0	0	0	0	0	0	0	0	0	0	0	0	0	0	0	0	0	0	0	0	0	0	0	0	5	1	2	0	0	0	0	0	0	0
Otu1168	1	0	0	0	0	0	0	0	0	0	0	0	0	0	0	0	0	0	1	0	0	0	1	0	0	0	0	0	0	0	0	0	0	0	0	0	0	0	0	1	0	0	0	0	0	0	0	0	0
Otu1169	0	0	0	0	0	0	0	0	0	0	0	0	0	0	0	0	0	0	0	0	0	0	0	0	0	0	0	0	0	0	0	0	0	0	0	0	0	0	0	0	0	0	0	0	0	0	0	0	0
Otu1170	0	0	0	0	0	0	0	0	0	0	0	0	0	0	0	0	0	0	0	0	0	0	1	0	0	0	0	0	1	0	0	2	0	0	0	0	0	0	0	0	0	0	0	0	0	0	0	0	0
Otu1171	0	0	0	0	0	0	0	0	0	0	0	0	0	0	0	0	0	0	0	0	0	0	0	0	0	0	0	0	0	0	0	0	0	0	0	0	0	0	0	0	0	0	0	0	0	0	0	0	0
Otu1172	0	0	0	0	0	0	0	0	0	0	0	0	0	0	0	0	8	0	0	0	0	0	0	0	0	0	0	0	0	0	0	0	0	0	0	0	0	0	0	0	0	0	0	0	0	0	0	0	0
Otu1173	0	0	0	0	0	0	0	0	0	0	0	0	0	0	0	0	0	0	0	0	0	0	0	0	0	0	0	0	0	0	0	0	0	0	0	0	0	0	0	0	0	0	0	0	0	0	0	0	0
Otu1174	2	0	0	0	0	0	0	0	0	0	0	0	0	0	0	0	0	0	0	0	0	0	0	0	0	0	0	0	0	0	0	0	0	0	0	0	0	0	0	0	0	0	0	0	0	0	0	0	0
Otu1175	0	0	0	0	0	0	0	0	0	0	0	0	0	0	0	0	0	0	0	0	0	0	0	0	0	0	0	0	0	0	0	0	0	0	0	0	0	0	0	0	0	0	0	0	0	0	0	0	0
Otu1176	0	0	0	0	0	0	0	0	0	0	0	0	0	8	0	0	0	0	0	0	0	0	0	0	0	0	0	0	0	0	0	0	0	0	0	0	0	0	0	0	0	0	0	0	0	0	0	0	0
Otu1177	0	0	0	0	0	0	0	0	0	0	0	0	0	0	0	0	0	0	0	0	0	0	0	0	0	0	0	0	0	0	0	0	0	0	0	0	0	0	0	0	0	0	0	2	0	0	0	0	0
Otu1178	0	0	0	0	0	0	0	0	0	0	8	0	0	0	0	0	0	0	0	0	0	0	0	0	0	0	0	0	0	0	0	0	0	0	0	0	0	0	0	0	0	0	0	0	0	0	0	0	0
Otu1179	0	0	0	0	0	0	0	0	0	0	0	0	0	0	0	0	0	0	0	0	0	0	0	0	0	0	0	0	0	0	0	0	0	0	0	0	0	0	0	0	0	0	0	0	0	0	0	0	0
Otu1180	0	0	0	0	0	0	8	0	0	0	0	0	0	0	0	0	0	0	0	0	0	0	0	0	0	0	0	0	0	0	0	0	0	0	0	0	0	0	0	0	0	0	0	0	0	0	0	0	0
Otu1181	0	0	0	0	0	8	0	0	0	0	0	0	0	0	0	0	0	0	0	0	0	0	0	0	0	0	0	0	0	0	0	0	0	0	0	0	0	0	0	0	0	0	0	0	0	0	0	0	0
Otu1182	0	0	0	0	0	0	0	0	0	0	0	0	0	0	0	0	0	0	0	0	0	0	0	0	0	0	0	0	0	0	0	0	0	0	0	0	0	0	0	0	0	0	0	0	0	0	0	0	0
Otu1183	0	0	0	0	0	0	0	0	0	0	0	0	0	0	0	0	0	0	0	0	0	0	0	0	0	0	0	0	0	0	0	8	0	0	0	0	0	0	0	0	0	0	0	0	0	0	0	0	0
Otu1184	0	0	0	0	0	0	0	0	0	2	3	0	2	0	0	0	1	0	0	0	0	0	0	0	0	0	0	0	0	0	0	0	0	0	0	0	0	0	0	0	0	0	0	0	0	0	0	0	0
Otu1185	0	0	0	0	0	0	0	0	0	0	0	0	0	0	0	0	0	0	0	0	0	0	0	0	0	1	0	7	0	0	0	0	0	0	0	0	0	0	0	0	0	0	0	0	0	0	0	0	0
Otu1186	0	0	0	0	0	0	0	0	0	0	0	0	0	0	0	0	0	0	0	0	0	0	0	0	0	0	0	0	0	0	0	0	0	0	0	0	0	0	0	0	0	0	0	0	0	0	0	0	0
Otu1187	0	0	0	0	0	0	7	0	0	0	0	0	0	0	0	0	0	0	0	0	0	0	0	0	0	0	0	0	0	0	0	0	0	0	0	0	0	0	0	0	0	0	0	0	0	0	0	0	0
Otu1188	0	0	0	0	0	0	0	0	0	0	0	0	0	7	0	0	0	0	0	0	0	0	0	0	0	0	0	0	0	0	0	0	0	0	0	0	0	0	0	0	0	0	0	0	0	0	0	0	0
Otu1189	0	0	0	0	0	0	0	0	0	0	7	0	0	0	0	0	0	0	0	0	0	0	0	0	0	0	0	0	0	0	0	0	0	0	0	0	0	0	0	0	0	0	0	0	0	0	0	0	0
Otu1190	0	0	0	0	0	0	0	0	0	0	0	0	0	0	0	0	0	0	0	0	0	1	0	0	0	0	0	0	0	0	0	0	0	0	0	0	0	0	0	0	0	0	2	0	0	0	0	0	0
Otu1191	0	0	0	0	0	0	0	0	0	0	0	0	0	0	0	0	0	0	0	0	0	0	0	0	0	0	0	0	0	0	0	2	0	0	0	0	0	0	0	5	0	0	0	0	0	0	0	0	0
Otu1192	0	0	0	0	3	0	0	0	0	0	0	0	0	0	0	0	0	0	0	0	0	0	0	0	0	0	0	0	0	0	0	0	0	0	0	0	0	0	0	0	0	0	0	0	0	0	0	0	0
Otu1193	0	0	0	0	0	0	0	0	0	0	0	0	0	0	0	0	0	0	0	0	0	0	0	0	0	1	2	0	0	0	1	0	0	0	0	0	0	0	1	0	0	1	0	0	0	0	0	0	0
Otu1194	0	0	0	0	0	0	0	0	0	0	0	0	0	0	0	0	0	0	0	0	0	0	0	0	0	0	0	0	0	0	1	0	0	0	0	5	0	0	0	0	0	0	0	0	0	0	0	0	0
Otu1195	0	0	0	0	0	0	0	0	0	0	0	0	0	0	0	0	0	0	0	0	0	0	0	0	0	0	0	0	0	0	0	0	0	0	0	0	0	0	0	0	0	0	0	0	0	0	7	0	0
Otu1196	0	0	0	0	0	0	0	0	0	0	0	0	0	0	0	0	0	0	0	0	0	0	0	0	0	0	0	0	0	0	0	0	0	0	0	0	0	0	0	0	0	0	0	0	0	0	0	0	0
Otu1197	0	0	0	0	0	0	0	0	0	0	0	0	0	0	0	0	0	0	0	0	0	0	2	0	0	0	0	0	0	0	0	0	0	0	1	0	0	0	0	0	0	0	0	0	0	0	0	0	2
Otu1198	0	0	0	0	0	0	0	0	0	0	0	0	0	0	0	0	0	0	0	0	0	0	0	0	0	0	0	0	0	0	0	0	0	1	3	0	0	0	0	0	0	0	0	2	0	0	0	0	0
Otu1199	0	0	0	0	0	0	3	0	0	0	0	0	0	4	0	0	0	0	0	0	0	0	0	0	0	0	0	0	0	0	0	0	0	0	0	0	0	0	0	0	0	0	0	0	0	0	0	0	0
Otu1200	0	0	0	0	0	0	0	0	0	0	0	0	0	0	0	0	0	0	0	0	0	0	0	0	0	0	0	0	0	0	0	0	0	0	0	0	0	0	0	0	0	0	0	0	0	0	0	0	0
Otu1201	0	0	0	0	0	0	0	0	0	0	0	0	0	0	0	0	0	0	0	0	0	0	0	0	0	0	0	0	0	0	0	0	0	0	0	0	0	0	0	0	0	0	0	0	0	0	0	0	0
Otu1202	0	0	0	0	0	0	0	0	0	0	0	0	0	0	0	0	0	0	0	0	0	0	0	0	0	0	0	7	0	0	0	0	0	0	0	0	0	0	0	0	0	0	0	0	0	0	0	0	0
Otu1203	0	0	0	0	0	0	0	0	0	0	0	0	0	0	0	0	0	0	0	0	0	0	0	0	0	0	0	0	0	0	0	0	0	0	3	0	0	0	0	0	0	2	0	0	0	0	0	0	0
Otu1204	0	0	0	0	0	0	0	0	0	0	0	0	0	0	0	0	0	0	0	0	0	0	0	0	0	0	0	0	0	0	0	0	0	0	0	0	0	0	0	0	0	0	0	0	0	0	0	0	1
Otu1205	0	0	0	0	0	0	0	0	0	0	0	0	0	0	0	0	0	0	0	0	0	0	1	0	2	0	0	0	0	0	0	0	1	0	0	0	0	0	0	0	0	1	0	0	0	0	0	0	0
Otu1206	0	0	0	0	2	0	0	0	0	0	0	0	0	0	1	4	0	0	0	0	0	0	0	0	0	0	0	0	0	0	0	0	0	0	0	0	0	0	0	0	0	0	0	0	0	0	0	0	0
Otu1207	0	0	0	0	0	0	0	0	0	0	0	0	0	7	0	0	0	0	0	0	0	0	0	0	0	0	0	0	0	0	0	0	0	0	0	0	0	0	0	0	0	0	0	0	0	0	0	0	0
Otu1208	0	0	0	0	0	7	0	0	0	0	0	0	0	0	0	0	0	0	0	0	0	0	0	0	0	0	0	0	0	0	0	0	0	0	0	0	0	0	0	0	0	0	0	0	0	0	0	0	0
Otu1209	0	0	0	0	0	0	0	0	0	0	0	0	0	0	0	0	0	0	0	0	0	0	0	0	0	0	0	0	0	0	0	0	0	0	0	0	0	0	0	0	0	0	0	0	0	2	0	0	0
Otu1210	0	0	0	0	0	0	0	0	0	0	0	0	0	0	0	0	0	0	0	0	0	0	0	0	0	0	0	0	0	0	0	0	0	0	0	0	0	0	0	0	0	0	0	0	0	0	0	0	0
Otu1211	0	0	0	0	0	0	0	0	0	0	0	0	0	0	0	0	0	0	0	0	0	0	0	0	0	0	0	0	0	0	0	0	0	0	0	0	0	0	0	0	0	0	0	0	0	0	0	0	0
Otu1212	0	0	0	0	0	0	0	0	0	0	0	0	0	0	0	0	0	0	0	0	0	0	0	1	2	0	0	1	2	0	0	0	0	0	0	0	0	0	1	0	0	0	0	0	0	0	0	0	0
Otu1213	0	0	0	0	0	0	0	0	0	0	0	0	0	0	0	0	0	0	0	0	0	0	0	0	0	0	0	0	0	0	0	0	0	0	0	0	0	0	0	0	0	0	0	0	0	0	7	0	0
Otu1214	0	0	0	0	0	0	0	0	0	0	0	0	0	0	0	0	0	0	0	0	0	0	0	0	0	0	0	0	0	0	0	0	0	0	0	0	0	0	0	0	0	0	0	0	0	0	0	0	0
Otu1215	0	0	0	0	0	0	0	0	0	0	7	0	0	0	0	0	0	0	0	0	0	0	0	0	0	0	0	0	0	0	0	0	0	0	0	0	0	0	0	0	0	0	0	0	0	0	0	0	0
Otu1216	0	0	0	0	0	0	0	0	0	0	0	0	0	0	0	0	0	0	0	0	0	0	0	0	0	0	0	0	0	0	0	0	0	0	0	0	0	0	0	0	0	0	7	0	0	0	0	0	0
Otu1217	0	0	0	0	0	0	0	0	0	0	0	0	0	0	0	0	0	0	0	0	0	1	1	0	1	0	0	0	0	0	0	0	0	0	0	0	0	4	0	0	0	0	0	0	0	0	0	0	0
Otu1218	0	0	0	0	0	0	0	1	0	0	4	0	0	0	0	0	0	0	0	0	0	0	0	0	0	0	0	0	0	0	0	0	0	0	0	0	0	0	0	0	0	0	0	0	0	0	0	0	0
Otu1219	0	0	0	0	0	0	0	0	0	0	0	0	0	0	0	0	0	0	0	0	0	0	0	0	0	0	0	2	0	0	0	0	0	0	0	2	0	0	2	0	0	1	0	0	0	0	0	0	0
Otu1220	0	0	0	2	0	0	0	0	0	0	0	0	0	0	0	0	0	0	0	0	0	0	0	0	0	0	0	0	0	0	0	0	0	0	0	0	0	0	0	0	0	0	0	0	0	0	0	0	0
Otu1221	0	0	0	0	0	0	0	0	0	0	0	0	0	0	0	0	0	0	0	0	0	0	0	0	0	0	0	3	0	0	0	0	0	0	0	0	0	0	0	0	0	0	0	0	0	0	0	0	0
Otu1222	0	0	0	0	0	0	0	0	0	7	0	0	0	0	0	0	0	0	0	0	0	0	0	0	0	0	0	0	0	0	0	0	0	0	0	0	0	0	0	0	0	0	0	0	0	0	0	0	0
Otu1223	0	0	0	0	0	0	0	0	0	0	0	0	0	0	1	0	0	0	0	0	0	0	0	0	0	1	2	0	1	1	0	0	0	0	0	1	0	0	0	0	0	0	0	0	0	0	0	0	0
Otu1224	0	0	0	0	0	0	0	0	0	0	0	0	0	0	0	0	0	0	0	0	0	0	0	0	0	0	0	0	0	0	0	3	0	0	0	0	0	0	0	1	0	0	0	0	3	0	0	0	0
Otu1225	0	6	0	0	0	0	0	0	0	0	0	0	0	0	0	1	0	0	0	0	0	0	0	0	0	0	0	0	0	0	0	0	0	0	0	0	0	0	0	0	0	0	0	0	0	0	0	0	0
Otu1226	0	0	0	0	0	0	0	0	0	0	0	0	0	0	0	7	0	0	0	0	0	0	0	0	0	0	0	0	0	0	0	0	0	0	0	0	0	0	0	0	0	0	0	0	0	0	0	0	0
Otu1227	0	0	0	0	0	0	0	0	0	0	0	0	0	0	0	0	7	0	0	0	0	0	0	0	0	0	0	0	0	0	0	0	0	0	0	0	0	0	0	0	0	0	0	0	0	0	0	0	0
Otu1228	0	0	0	0	0	0	0	7	0	0	0	0	0	0	0	0	0	0	0	0	0	0	0	0	0	0	0	0	0	0	0	0	0	0	0	0	0	0	0	0	0	0	0	0	0	0	0	0	0
Otu1229	0	0	0	0	0	0	0	0	0	0	0	0	0	0	0	0	0	0	0	0	0	0	0	0	0	0	0	0	0	0	0	0	0	0	0	7	0	0	0	0	0	0	0	0	0	0	0	0	0
Otu1230	0	0	0	1	0	0	4	0	0	0	0	0	0	2	0	0	0	0	0	0	0	0	0	0	0	0	0	0	0	0	0	0	0	0	0	0	0	0	0	0	0	0	0	0	0	0	0	0	0
Otu1231	0	0	0	0	0	0	0	0	0	0	0	0	0	0	0	0	0	0	0	0	0	0	0	0	0	0	0	0	0	0	0	0	0	0	0	0	0	0	0	0	0	0	0	0	0	0	0	0	0
Otu1232	0	0	0	0	0	0	0	7	0	0	0	0	0	0	0	0	0	0	0	0	0	0	0	0	0	0	0	0	0	0	0	0	0	0	0	0	0	0	0	0	0	0	0	0	0	0	0	0	0
Otu1233	0	0	0	0	0	7	0	0	0	0	0	0	0	0	0	0	0	0	0	0	0	0	0	0	0	0	0	0	0	0	0	0	0	0	0	0	0	0	0	0	0	0	0	0	0	0	0	0	0
Otu1234	0	0	0	0	0	0	7	0	0	0	0	0	0	0	0	0	0	0	0	0	0	0	0	0	0	0	0	0	0	0	0	0	0	0	0	0	0	0	0	0	0	0	0	0	0	0	0	0	0
Otu1235	0	0	0	0	0	0	0	0	0	7	0	0	0	0	0	0	0	0	0	0	0	0	0	0	0	0	0	0	0	0	0	0	0	0	0	0	0	0	0	0	0	0	0	0	0	0	0	0	0
Otu1236	0	0	0	0	0	0	0	0	0	0	0	0	0	0	0	0	0	0	0	0	0	0	0	0	0	0	0	0	0	0	0	0	1	0	0	0	0	0	0	0	0	0	0	0	0	0	0	0	0
Otu1237	0	0	0	0	0	0	7	0	0	0	0	0	0	0	0	0	0	0	0	0	0	0	0	0	0	0	0	0	0	0	0	0	0	0	0	0	0	0	0	0	0	0	0	0	0	0	0	0	0
Otu1238	0	0	0	0	0	0	0	0	0	0	0	0	0	0	0	0	0	0	0	0	0	0	0	0	0	0	0	0	0	0	0	0	0	0	0	0	0	0	0	0	0	0	0	0	0	0	0	6	0
Otu1239	0	0	0	0	0	0	0	0	0	0	0	0	0	0	0	7	0	0	0	0	0	0	0	0	0	0	0	0	0	0	0	0	0	0	0	0	0	0	0	0	0	0	0	0	0	0	0	0	0
Otu1240	0	0	0	0	0	0	0	0	0	0	0	0	0	0	0	0	0	0	0	0	0	0	0	0	0	0	0	0	0	0	0	0	0	0	0	0	0	3	0	0	0	0	0	0	0	0	0	0	0
Otu1241	0	0	0	0	0	0	0	0	0	0	0	0	0	0	0	0	0	0	0	0	0	0	0	0	0	0	0	0	0	0	0	1	3	0	0	0	0	0	0	0	0	0	0	0	0	0	0	0	0
Otu1242	0	0	0	0	0	0	0	0	0	0	6	0	0	0	0	0	0	0	0	0	0	0	0	0	0	0	0	0	0	0	0	0	0	0	0	0	0	0	0	0	0	0	0	0	0	0	0	0	0
Otu1243	0	0	0	0	0	0	0	0	0	0	0	0	0	0	0	0	0	0	0	0	0	0	0	0	0	0	0	0	0	0	0	0	0	0	0	0	0	0	0	0	0	0	0	0	0	0	0	0	0
Otu1244	0	0	0	0	0	0	0	0	0	0	0	0	0	0	0	0	0	0	0	1	0	0	0	0	0	0	0	0	0	0	0	0	0	0	0	0	0	0	0	0	0	0	0	0	0	0	0	0	0
Otu1245	0	0	0	0	0	0	0	0	0	2	0	0	0	0	0	0	0	0	1	0	0	0	0	0	0	0	0	0	0	0	0	0	0	0	0	0	0	0	0	0	0	0	0	0	0	0	0	0	0
Otu1246	0	0	0	0	0	6	0	0	0	0	0	0	0	0	0	0	0	0	0	0	0	0	0	0	0	0	0	0	0	0	0	0	0	0	0	0	0	0	0	0	0	0	0	0	0	0	0	0	0
Otu1247	0	0	0	0	0	0	0	0	0	0	0	0	0	0	0	0	0	0	0	0	0	0	0	0	0	0	0	0	0	0	0	0	0	0	0	0	0	0	0	0	0	0	0	0	0	0	0	0	1
Otu1248	2	0	0	0	0	0	0	0	0	0	0	0	0	0	0	0	0	0	4	0	0	0	0	0	0	0	0	0	0	0	0	0	0	0	0	0	0	0	0	0	0	0	0	0	0	0	0	0	0
Otu1249	0	0	0	0	0	0	0	0	0	0	0	0	0	6	0	0	0	0	0	0	0	0	0	0	0	0	0	0	0	0	0	0	0	0	0	0	0	0	0	0	0	0	0	0	0	0	0	0	0
Otu1250	0	0	0	0	0	0	0	0	0	0	0	0	0	6	0	0	0	0	0	0	0	0	0	0	0	0	0	0	0	0	0	0	0	0	0	0	0	0	0	0	0	0	0	0	0	0	0	0	0
Otu1251	0	0	0	0	0	0	0	0	0	0	0	0	0	0	0	0	0	0	0	0	0	0	0	0	0	0	0	0	0	0	0	0	0	0	0	0	0	0	0	0	0	0	0	6	0	0	0	0	0
Otu1252	0	0	0	0	0	0	0	0	0	0	0	0	0	0	0	0	0	0	0	0	0	0	0	0	0	0	0	0	0	0	0	0	0	0	0	0	0	0	0	0	0	0	0	0	0	0	0	0	0
Otu1253	0	0	0	0	0	0	0	0	0	0	0	0	0	0	0	0	6	0	0	0	0	0	0	0	0	0	0	0	0	0	0	0	0	0	0	0	0	0	0	0	0	0	0	0	0	0	0	0	0
Otu1254	0	0	0	0	0	0	0	0	0	0	0	0	0	0	0	0	0	0	0	0	0	0	0	0	0	0	0	0	0	0	0	6	0	0	0	0	0	0	0	0	0	0	0	0	0	0	0	0	0
Otu1255	0	0	0	0	0	0	3	0	0	0	0	0	0	0	0	0	3	0	0	0	0	0	0	0	0	0	0	0	0	0	0	0	0	0	0	0	0	0	0	0	0	0	0	0	0	0	0	0	0
Otu1256	0	0	0	0	0	0	0	0	0	0	0	0	0	0	0	0	0	0	0	0	0	0	0	0	0	0	0	0	0	0	0	0	0	0	0	0	0	0	0	0	0	0	0	0	0	0	0	0	0
Otu1257	0	0	0	0	0	0	0	0	0	0	0	0	0	0	0	0	0	0	0	0	0	0	0	0	0	0	0	0	0	0	0	0	0	0	0	0	0	0	0	0	0	0	0	0	0	0	0	0	0
Otu1258	0	0	0	0	0	0	0	0	0	0	0	0	0	0	0	0	0	0	0	0	0	0	0	0	0	0	0	0	0	0	0	0	0	0	0	0	0	0	0	0	0	0	0	0	0	0	1	1	0
Otu1259	0	0	0	0	0	0	0	0	0	0	6	0	0	0	0	0	0	0	0	0	0	0	0	0	0	0	0	0	0	0	0	0	0	0	0	0	0	0	0	0	0	0	0	0	0	0	0	0	0
Otu1260	0	0	0	0	0	0	0	0	0	6	0	0	0	0	0	0	0	0	0	0	0	0	0	0	0	0	0	0	0	0	0	0	0	0	0	0	0	0	0	0	0	0	0	0	0	0	0	0	0
Otu1261	0	0	0	0	0	0	0	0	0	0	0	0	0	0	0	0	0	0	0	0	0	0	0	0	0	0	0	0	0	0	0	4	0	0	1	0	0	0	0	0	1	0	0	0	0	0	0	0	0
Otu1262	0	0	0	0	0	0	0	0	0	0	0	0	0	0	0	0	0	0	0	0	0	0	0	0	0	0	0	0	0	0	0	0	0	0	0	0	0	0	0	2	0	0	0	1	0	1	0	0	0
Otu1263	0	0	0	0	0	0	0	0	0	0	0	0	0	0	0	0	0	0	0	0	0	0	0	0	0	0	0	0	0	0	0	0	0	0	0	0	0	0	0	0	0	0	0	0	0	0	6	0	0
Otu1264	0	0	0	0	0	0	0	0	0	0	0	0	0	0	0	0	0	0	0	0	0	0	0	0	0	0	0	0	0	0	0	0	0	0	0	0	0	0	0	0	0	0	0	0	0	0	0	0	0
Otu1265	0	0	0	0	0	0	0	0	0	0	0	0	0	0	0	0	0	0	0	0	0	0	0	0	0	0	0	0	0	0	0	0	0	0	0	0	0	0	0	4	1	0	0	0	0	0	0	0	0
Otu1266	0	0	0	0	0	0	0	0	0	0	0	0	0	0	0	0	0	0	0	0	0	0	0	0	0	0	0	0	0	0	0	0	0	0	0	0	0	0	0	0	0	0	0	0	0	1	0	0	3
Otu1267	0	0	0	0	0	0	0	0	0	0	0	0	0	0	0	0	0	0	0	0	0	0	0	0	0	0	0	0	0	0	0	0	0	0	0	0	0	0	0	0	0	0	0	0	0	0	0	0	0
Otu1268	0	0	0	0	0	0	0	0	0	0	0	0	0	0	0	0	0	0	0	0	0	0	0	0	0	0	0	0	0	0	0	0	0	0	0	0	0	0	0	0	0	0	0	0	0	0	0	0	0
Otu1269	6	0	0	0	0	0	0	0	0	0	0	0	0	0	0	0	0	0	0	0	0	0	0	0	0	0	0	0	0	0	0	0	0	0	0	0	0	0	0	0	0	0	0	0	0	0	0	0	0
Otu1270	0	0	0	0	0	0	0	0	0	0	0	0	0	0	0	0	0	0	0	0	0	0	0	0	0	0	0	0	0	0	0	0	1	0	0	0	0	0	0	0	0	0	0	0	0	0	0	0	0
Otu1271	0	0	0	0	0	0	0	0	0	0	0	0	0	0	0	0	0	0	0	0	0	0	0	0	1	0	0	0	0	0	0	0	0	0	0	0	0	0	0	0	0	0	0	0	0	0	2	0	0
Otu1272	0	0	0	0	0	0	0	0	0	0	0	0	0	0	0	0	0	0	0	0	0	0	0	0	0	0	0	0	0	0	0	0	0	0	0	0	0	0	0	0	0	0	0	0	0	0	0	0	0
Otu1273	0	0	0	0	0	0	4	0	0	0	0	0	0	0	0	0	0	0	0	0	0	0	0	1	0	0	0	0	0	0	0	0	0	0	0	0	0	0	0	0	0	0	0	0	0	0	0	0	0
Otu1274	0	0	0	0	0	0	0	0	0	0	0	0	0	0	0	0	0	0	0	0	0	0	0	0	0	0	0	0	1	0	0	2	0	0	0	0	0	0	0	0	1	0	0	0	0	0	0	0	0
Otu1275	0	0	0	0	0	0	0	0	0	0	0	0	0	0	0	0	0	0	0	0	0	0	3	0	2	0	0	0	0	0	0	0	0	0	0	0	0	0	1	0	0	0	0	0	0	0	0	0	0
Otu1276	0	0	0	0	0	0	0	0	0	0	6	0	0	0	0	0	0	0	0	0	0	0	0	0	0	0	0	0	0	0	0	0	0	0	0	0	0	0	0	0	0	0	0	0	0	0	0	0	0
Otu1277	0	0	0	0	0	0	0	0	0	0	0	0	0	0	0	0	0	0	0	0	0	0	0	1	0	0	0	0	0	0	0	0	0	0	0	0	0	0	0	0	0	0	0	0	0	0	0	0	0
Otu1278	0	0	0	0	0	0	0	0	0	0	0	0	0	0	0	0	0	0	0	0	0	0	0	0	0	0	0	0	0	0	0	0	0	0	1	0	0	0	0	0	0	5	0	0	0	0	0	0	0
Otu1279	0	0	0	0	0	0	0	0	0	0	0	0	0	0	0	0	0	0	0	0	0	0	0	0	0	0	0	0	0	0	0	0	0	0	0	0	0	0	0	0	0	0	0	0	0	0	0	0	0
Otu1280	0	4	0	0	0	0	0	0	0	0	2	0	0	0	0	0	0	0	0	0	0	0	0	0	0	0	0	0	0	0	0	0	0	0	0	0	0	0	0	0	0	0	0	0	0	0	0	0	0
Otu1281	0	0	0	0	0	0	0	0	0	0	0	0	0	0	0	0	0	0	0	0	0	0	0	0	0	0	0	0	0	0	0	0	0	0	0	0	0	0	0	0	0	0	0	0	1	0	0	0	0
Otu1282	0	0	0	0	0	0	0	0	0	0	0	0	0	0	0	0	0	0	0	0	0	1	0	0	1	0	0	0	1	0	0	3	0	0	0	0	0	0	0	0	0	0	0	0	0	0	0	0	0
Otu1283	0	0	0	0	0	0	0	0	0	0	0	0	0	0	0	0	0	0	0	0	0	0	0	0	0	0	0	0	0	0	0	6	0	0	0	0	0	0	0	0	0	0	0	0	0	0	0	0	0
Otu1284	0	0	0	0	0	0	0	0	0	0	0	0	0	0	0	0	0	0	0	0	1	0	0	0	0	0	0	0	0	0	0	0	0	0	0	0	0	0	0	0	0	0	0	0	0	0	0	0	0
Otu1285	0	0	0	0	0	0	0	0	0	0	0	0	0	0	0	0	0	0	0	0	0	0	0	0	0	0	0	0	0	0	0	0	0	0	0	0	0	0	0	4	0	0	0	0	0	0	0	0	0
Otu1286	0	0	0	0	0	0	0	0	0	6	0	0	0	0	0	0	0	0	0	0	0	0	0	0	0	0	0	0	0	0	0	0	0	0	0	0	0	0	0	0	0	0	0	0	0	0	0	0	0
Otu1287	0	0	0	0	0	0	0	0	0	0	0	0	0	0	0	0	0	0	0	0	0	0	0	0	0	0	0	0	4	0	0	0	0	0	1	0	0	0	1	0	0	0	0	0	0	0	0	0	0
Otu1288	0	0	0	0	0	0	0	0	0	0	0	0	0	0	0	0	6	0	0	0	0	0	0	0	0	0	0	0	0	0	0	0	0	0	0	0	0	0	0	0	0	0	0	0	0	0	0	0	0
Otu1289	0	0	0	0	0	0	0	0	0	0	0	0	0	0	0	0	0	0	0	0	0	0	0	0	0	0	0	0	0	0	0	0	0	0	0	0	0	0	0	0	0	0	0	0	0	0	0	0	0
Otu1290	0	0	0	0	0	0	0	4	0	0	0	0	0	0	0	2	0	0	0	0	0	0	0	0	0	0	0	0	0	0	0	0	0	0	0	0	0	0	0	0	0	0	0	0	0	0	0	0	0
Otu1291	0	0	0	0	0	0	0	0	0	0	0	0	0	6	0	0	0	0	0	0	0	0	0	0	0	0	0	0	0	0	0	0	0	0	0	0	0	0	0	0	0	0	0	0	0	0	0	0	0
Otu1292	0	0	0	0	0	0	0	0	0	0	0	0	0	0	0	0	0	0	6	0	0	0	0	0	0	0	0	0	0	0	0	0	0	0	0	0	0	0	0	0	0	0	0	0	0	0	0	0	0
Otu1293	0	0	0	0	0	0	0	0	0	0	0	0	0	0	0	0	0	0	0	0	0	0	0	0	0	0	0	0	0	0	0	0	0	0	0	0	0	0	0	0	0	0	0	0	0	0	3	0	0
Otu1294	0	0	0	0	0	0	6	0	0	0	0	0	0	0	0	0	0	0	0	0	0	0	0	0	0	0	0	0	0	0	0	0	0	0	0	0	0	0	0	0	0	0	0	0	0	0	0	0	0
Otu1295	0	0	0	0	0	0	0	0	0	6	0	0	0	0	0	0	0	0	0	0	0	0	0	0	0	0	0	0	0	0	0	0	0	0	0	0	0	0	0	0	0	0	0	0	0	0	0	0	0
Otu1296	6	0	0	0	0	0	0	0	0	0	0	0	0	0	0	0	0	0	0	0	0	0	0	0	0	0	0	0	0	0	0	0	0	0	0	0	0	0	0	0	0	0	0	0	0	0	0	0	0
Otu1297	0	0	0	0	0	0	0	0	0	0	0	0	0	0	0	0	0	2	0	0	0	0	0	0	0	0	0	0	0	0	0	0	0	0	0	0	0	0	0	0	0	0	0	0	0	0	0	0	0
Otu1298	0	0	0	0	0	0	0	6	0	0	0	0	0	0	0	0	0	0	0	0	0	0	0	0	0	0	0	0	0	0	0	0	0	0	0	0	0	0	0	0	0	0	0	0	0	0	0	0	0
Otu1299	0	0	0	0	5	0	0	0	0	0	0	0	0	0	0	1	0	0	0	0	0	0	0	0	0	0	0	0	0	0	0	0	0	0	0	0	0	0	0	0	0	0	0	0	0	0	0	0	0
Otu1300	0	0	0	0	0	0	0	0	0	0	0	0	0	6	0	0	0	0	0	0	0	0	0	0	0	0	0	0	0	0	0	0	0	0	0	0	0	0	0	0	0	0	0	0	0	0	0	0	0
Otu1301	0	0	0	0	0	0	0	0	0	0	0	0	0	6	0	0	0	0	0	0	0	0	0	0	0	0	0	0	0	0	0	0	0	0	0	0	0	0	0	0	0	0	0	0	0	0	0	0	0
Otu1302	0	0	0	0	0	0	0	0	0	0	0	0	0	0	0	0	0	0	0	0	0	0	0	0	0	0	0	0	0	0	0	0	0	0	0	0	0	0	0	0	0	0	1	0	0	0	0	0	0
Otu1303	0	0	0	0	0	0	0	0	0	0	0	0	0	0	0	0	0	0	0	0	0	0	0	0	0	0	0	0	1	0	0	0	0	1	0	0	0	0	1	3	0	0	0	0	0	0	0	0	0
Otu1304	0	0	0	0	0	0	0	0	0	0	0	0	0	0	0	0	0	0	0	0	0	0	0	0	0	0	0	0	0	0	0	0	0	0	0	0	0	0	0	0	0	0	0	1	0	0	0	1	0
Otu1305	0	0	0	0	0	0	0	0	0	0	0	0	0	0	0	4	0	0	0	0	0	0	0	0	0	0	0	0	0	0	0	0	0	0	0	0	0	0	0	0	0	0	0	0	0	0	0	1	1
Otu1306	0	0	0	0	0	0	0	0	0	0	0	0	0	0	0	0	0	0	0	0	0	0	0	0	1	0	0	0	0	1	0	0	0	0	0	0	3	0	0	1	0	0	0	0	0	0	0	0	0
Otu1307	0	0	0	0	0	0	0	0	0	0	0	0	0	0	0	0	0	0	0	0	0	0	0	0	0	0	0	0	0	0	0	0	0	0	0	5	0	0	1	0	0	0	0	0	0	0	0	0	0
Otu1308	0	0	0	0	0	0	0	0	0	0	0	0	0	0	0	0	0	0	0	0	0	0	0	0	0	0	0	0	0	0	0	0	0	0	0	0	0	0	0	0	0	0	0	0	0	0	0	0	0
Otu1309	0	0	0	0	0	0	0	0	0	6	0	0	0	0	0	0	0	0	0	0	0	0	0	0	0	0	0	0	0	0	0	0	0	0	0	0	0	0	0	0	0	0	0	0	0	0	0	0	0
Otu1310	0	0	0	0	0	0	0	0	0	0	0	0	0	0	0	0	0	0	0	0	0	0	0	0	0	0	0	0	0	0	0	0	0	0	0	0	0	0	0	0	0	0	0	0	0	0	0	0	0
Otu1311	0	0	0	0	0	0	0	0	0	0	0	0	0	0	0	0	6	0	0	0	0	0	0	0	0	0	0	0	0	0	0	0	0	0	0	0	0	0	0	0	0	0	0	0	0	0	0	0	0
Otu1312	0	0	0	0	0	0	0	0	0	0	0	0	0	0	0	0	0	0	0	0	0	0	0	0	6	0	0	0	0	0	0	0	0	0	0	0	0	0	0	0	0	0	0	0	0	0	0	0	0
Otu1313	0	0	0	0	0	0	0	0	0	0	6	0	0	0	0	0	0	0	0	0	0	0	0	0	0	0	0	0	0	0	0	0	0	0	0	0	0	0	0	0	0	0	0	0	0	0	0	0	0
Otu1314	0	0	0	0	0	6	0	0	0	0	0	0	0	0	0	0	0	0	0	0	0	0	0	0	0	0	0	0	0	0	0	0	0	0	0	0	0	0	0	0	0	0	0	0	0	0	0	0	0
Otu1315	0	0	0	0	0	0	6	0	0	0	0	0	0	0	0	0	0	0	0	0	0	0	0	0	0	0	0	0	0	0	0	0	0	0	0	0	0	0	0	0	0	0	0	0	0	0	0	0	0
Otu1316	0	0	0	0	0	0	0	0	0	0	6	0	0	0	0	0	0	0	0	0	0	0	0	0	0	0	0	0	0	0	0	0	0	0	0	0	0	0	0	0	0	0	0	0	0	0	0	0	0
Otu1317	0	0	0	0	0	5	0	0	0	0	0	0	0	0	0	0	0	0	0	0	0	0	0	0	0	0	0	0	0	0	0	1	0	0	0	0	0	0	0	0	0	0	0	0	0	0	0	0	0
Otu1318	0	0	0	0	0	0	6	0	0	0	0	0	0	0	0	0	0	0	0	0	0	0	0	0	0	0	0	0	0	0	0	0	0	0	0	0	0	0	0	0	0	0	0	0	0	0	0	0	0
Otu1319	0	0	0	0	0	0	0	6	0	0	0	0	0	0	0	0	0	0	0	0	0	0	0	0	0	0	0	0	0	0	0	0	0	0	0	0	0	0	0	0	0	0	0	0	0	0	0	0	0
Otu1320	0	0	0	0	0	0	0	0	0	0	0	0	0	0	0	0	0	0	0	0	0	0	0	0	0	0	0	0	0	0	0	0	0	0	0	0	0	0	0	0	0	0	0	0	0	0	6	0	0
Otu1321	0	0	0	0	0	0	6	0	0	0	0	0	0	0	0	0	0	0	0	0	0	0	0	0	0	0	0	0	0	0	0	0	0	0	0	0	0	0	0	0	0	0	0	0	0	0	0	0	0
Otu1322	0	0	0	0	0	0	0	0	0	0	0	0	0	0	0	0	0	0	0	0	0	0	0	0	0	0	0	0	0	0	0	0	0	0	0	0	0	0	0	0	0	0	0	0	0	0	0	0	0
Otu1323	0	0	0	0	0	0	0	0	0	0	0	0	0	0	0	0	0	0	0	6	0	0	0	0	0	0	0	0	0	0	0	0	0	0	0	0	0	0	0	0	0	0	0	0	0	0	0	0	0
Otu1324	0	0	0	0	0	0	0	0	0	0	0	0	0	0	0	0	0	0	0	0	0	0	0	0	0	0	0	1	0	0	0	0	0	0	1	0	0	0	0	0	0	0	0	0	0	0	0	0	3
Otu1325	0	0	0	0	4	0	0	0	0	0	0	0	0	0	0	0	0	0	0	0	0	0	0	0	0	0	0	0	0	0	0	0	0	0	0	0	0	0	0	0	0	0	0	0	0	0	0	0	0
Otu1326	0	0	0	0	0	0	0	0	0	0	0	0	0	0	0	0	0	0	0	0	0	2	0	0	0	0	0	0	0	0	0	0	0	0	0	0	0	0	4	0	0	0	0	0	0	0	0	0	0
Otu1327	0	0	0	2	0	0	0	0	0	0	0	0	0	0	0	4	0	0	0	0	0	0	0	0	0	0	0	0	0	0	0	0	0	0	0	0	0	0	0	0	0	0	0	0	0	0	0	0	0
Otu1328	0	0	0	0	0	0	0	0	0	0	0	0	0	0	0	0	0	0	0	0	0	0	0	0	0	0	0	0	0	0	0	0	0	0	0	0	0	0	0	0	0	0	0	0	0	0	0	0	0
Otu1329	0	0	0	0	0	0	0	0	0	0	0	0	0	0	0	0	0	0	0	0	0	0	0	0	0	0	0	0	0	0	0	0	0	0	0	0	0	6	0	0	0	0	0	0	0	0	0	0	0
Otu1330	0	0	0	0	0	6	0	0	0	0	0	0	0	0	0	0	0	0	0	0	0	0	0	0	0	0	0	0	0	0	0	0	0	0	0	0	0	0	0	0	0	0	0	0	0	0	0	0	0
Otu1331	0	0	0	0	0	0	0	0	0	0	0	0	6	0	0	0	0	0	0	0	0	0	0	0	0	0	0	0	0	0	0	0	0	0	0	0	0	0	0	0	0	0	0	0	0	0	0	0	0
Otu1332	0	0	0	0	0	0	0	0	0	0	0	0	0	0	0	0	0	1	0	0	3	0	0	0	1	0	0	0	0	0	0	0	0	0	0	1	0	0	0	0	0	0	0	0	0	0	0	0	0
Otu1333	6	0	0	0	0	0	0	0	0	0	0	0	0	0	0	0	0	0	0	0	0	0	0	0	0	0	0	0	0	0	0	0	0	0	0	0	0	0	0	0	0	0	0	0	0	0	0	0	0
Otu1334	0	0	0	0	0	0	0	0	0	0	0	0	0	0	0	0	0	0	0	0	0	0	0	0	0	0	0	0	0	0	0	0	0	0	0	0	0	0	0	0	0	0	0	0	1	0	1	0	0
Otu1335	0	0	0	0	0	0	0	0	0	0	0	0	0	0	0	0	0	0	0	0	0	0	0	0	0	0	0	0	0	0	0	0	0	0	0	0	0	0	0	0	0	0	0	0	0	0	0	0	0
Otu1336	0	0	0	0	0	0	0	0	0	0	0	0	0	0	0	0	0	0	0	0	0	0	0	0	0	0	0	1	0	0	0	0	2	0	3	0	0	0	0	0	0	0	0	0	0	0	0	0	0
Otu1337	0	0	0	0	0	0	0	0	0	0	0	0	0	0	0	0	0	0	0	0	0	0	0	0	0	0	0	0	0	0	0	0	0	0	0	0	0	0	0	0	0	0	0	0	0	0	0	0	0
Otu1338	5	0	0	0	0	0	0	0	0	0	0	0	0	0	0	0	0	0	0	0	0	0	0	0	0	0	0	0	0	0	0	0	0	0	0	0	0	0	0	0	0	0	0	0	0	0	0	0	0
Otu1339	0	0	0	0	0	0	0	0	0	0	0	0	0	0	0	0	5	0	0	0	0	0	0	0	0	0	0	0	0	0	0	0	0	0	0	0	0	0	0	0	0	0	0	0	0	0	0	0	0
Otu1340	0	0	0	0	0	0	0	0	0	0	0	0	0	0	0	0	0	0	0	0	0	0	0	0	0	0	0	0	0	0	0	0	0	0	0	0	0	0	0	0	0	0	0	0	0	0	5	0	0
Otu1341	0	0	0	0	0	0	0	0	0	0	0	0	0	0	0	0	0	0	0	0	0	0	0	0	0	0	0	0	0	0	0	0	0	0	0	0	0	0	0	0	0	0	0	2	0	0	0	0	0
Otu1342	0	0	0	0	0	0	0	0	0	0	0	0	0	0	0	0	0	0	0	0	0	0	0	0	0	0	0	0	0	0	0	0	0	0	0	0	0	0	0	0	0	0	0	0	0	0	0	0	0
Otu1343	0	0	0	0	0	0	0	0	0	0	0	0	0	0	0	0	0	0	0	0	0	0	0	0	0	0	1	0	0	0	0	0	0	0	1	0	0	0	0	0	0	0	1	0	0	0	0	0	0
Otu1344	0	0	0	0	0	0	0	0	0	0	0	0	0	0	0	0	0	0	0	0	0	0	0	0	0	0	0	0	0	0	0	0	0	0	0	0	0	0	0	0	0	0	0	2	0	0	0	0	0
Otu1345	0	5	0	0	0	0	0	0	0	0	0	0	0	0	0	0	0	0	0	0	0	0	0	0	0	0	0	0	0	0	0	0	0	0	0	0	0	0	0	0	0	0	0	0	0	0	0	0	0
Otu1346	0	0	0	0	0	0	0	0	0	0	0	0	0	0	0	0	0	0	0	0	0	0	0	0	0	0	0	0	0	0	0	0	0	0	0	0	0	0	0	0	0	0	0	0	0	0	0	0	0
Otu1347	0	0	0	0	0	0	0	0	0	0	0	0	0	0	0	0	0	0	0	0	0	1	0	0	0	0	0	0	0	0	0	0	0	0	0	0	0	0	0	0	1	0	0	0	0	0	0	0	0
Otu1348	0	0	0	0	0	5	0	0	0	0	0	0	0	0	0	0	0	0	0	0	0	0	0	0	0	0	0	0	0	0	0	0	0	0	0	0	0	0	0	0	0	0	0	0	0	0	0	0	0
Otu1349	0	0	0	0	0	0	0	0	0	0	0	0	0	0	0	0	0	0	0	0	0	0	0	0	0	0	0	0	0	0	0	0	0	0	0	0	0	0	0	0	0	0	0	0	0	0	0	0	0
Otu1350	0	0	0	0	0	0	0	0	0	0	0	0	0	0	0	0	0	0	0	0	0	0	0	0	0	0	0	0	0	3	0	0	0	0	0	0	1	0	1	0	0	0	0	0	0	0	0	0	0
Otu1351	0	0	0	0	0	0	0	0	0	0	0	0	0	0	0	0	0	0	0	0	0	1	0	0	0	0	0	0	0	0	0	0	0	0	0	0	0	0	0	2	1	0	0	0	0	0	0	0	0
Otu1352	0	0	0	0	0	0	0	0	0	0	0	0	0	0	0	0	0	0	0	0	0	0	0	0	0	0	0	0	0	0	0	0	0	0	0	0	0	0	0	0	0	0	0	0	0	0	5	0	0
Otu1353	0	0	0	0	0	0	0	0	0	0	0	0	0	0	0	5	0	0	0	0	0	0	0	0	0	0	0	0	0	0	0	0	0	0	0	0	0	0	0	0	0	0	0	0	0	0	0	0	0
Otu1354	0	0	0	0	0	0	0	0	0	0	0	0	0	0	0	0	0	0	0	0	0	0	0	2	0	0	0	0	0	0	0	0	0	0	0	0	0	0	3	0	0	0	0	0	0	0	0	0	0
Otu1355	0	0	0	0	0	0	0	0	0	0	0	0	0	0	0	0	0	0	0	0	0	0	0	0	0	0	0	0	0	0	0	0	0	0	0	0	0	0	0	0	0	0	0	0	0	0	0	0	0
Otu1356	0	0	0	0	0	0	0	0	0	0	0	0	0	0	0	0	0	0	0	0	0	0	1	0	0	0	0	0	2	0	0	0	0	0	0	0	0	0	0	0	0	0	0	0	0	0	0	0	0
Otu1357	0	0	0	0	0	0	0	0	0	0	0	0	0	0	0	0	0	0	0	0	0	0	0	0	0	0	0	0	0	0	0	0	0	0	0	0	0	0	0	0	0	0	0	0	0	0	5	0	0
Otu1358	0	0	0	0	0	0	0	0	0	0	0	0	0	0	0	0	0	0	0	0	0	0	0	0	0	0	0	0	0	5	0	0	0	0	0	0	0	0	0	0	0	0	0	0	0	0	0	0	0
Otu1359	0	0	0	0	0	0	0	0	0	0	0	0	0	0	0	0	0	0	0	5	0	0	0	0	0	0	0	0	0	0	0	0	0	0	0	0	0	0	0	0	0	0	0	0	0	0	0	0	0
Otu1360	0	0	0	0	0	0	0	0	0	0	0	0	0	0	0	0	0	0	0	0	0	0	0	0	0	0	0	0	0	0	0	0	0	0	0	0	0	0	0	0	0	0	0	0	0	0	0	0	0
Otu1361	0	0	0	0	0	0	0	0	0	0	0	0	0	0	0	0	0	0	0	0	0	0	0	0	0	0	0	0	0	0	0	5	0	0	0	0	0	0	0	0	0	0	0	0	0	0	0	0	0
Otu1362	0	0	0	0	0	0	0	0	0	0	0	0	0	0	0	0	0	0	0	0	0	0	0	0	0	0	0	0	0	0	0	0	0	0	0	0	0	0	0	0	5	0	0	0	0	0	0	0	0
Otu1363	0	0	0	0	0	0	0	0	0	0	0	0	0	0	0	0	0	0	0	0	0	0	0	0	0	0	0	0	0	0	0	0	0	0	0	0	0	0	0	0	0	0	0	0	0	0	5	0	0
Otu1364	0	0	0	0	0	0	0	0	0	0	0	0	0	0	0	0	0	0	0	0	0	0	0	0	0	0	0	0	0	0	0	0	0	0	0	0	0	0	0	0	0	0	2	0	0	0	0	0	0
Otu1365	0	0	0	0	0	0	0	0	0	0	0	0	0	0	0	0	0	0	0	0	0	0	0	0	1	0	0	0	0	0	0	0	0	0	0	0	0	0	0	0	0	0	0	0	0	0	0	0	0
Otu1366	0	0	0	0	0	0	0	0	0	0	0	0	5	0	0	0	0	0	0	0	0	0	0	0	0	0	0	0	0	0	0	0	0	0	0	0	0	0	0	0	0	0	0	0	0	0	0	0	0
Otu1367	0	0	0	0	0	0	0	0	0	0	0	0	0	0	0	0	0	0	0	0	0	0	1	0	0	0	0	1	0	0	0	0	0	0	2	0	0	0	0	0	1	0	0	0	0	0	0	0	0
Otu1368	0	0	0	0	0	0	0	0	0	0	0	0	0	0	0	0	0	0	0	0	0	0	0	0	0	0	0	0	0	0	0	0	0	0	1	4	0	0	0	0	0	0	0	0	0	0	0	0	0
Otu1369	0	0	0	0	0	0	0	0	0	0	0	0	0	0	0	0	0	0	0	5	0	0	0	0	0	0	0	0	0	0	0	0	0	0	0	0	0	0	0	0	0	0	0	0	0	0	0	0	0
Otu1370	0	0	0	0	0	0	0	0	0	0	0	0	0	0	0	0	0	0	0	0	0	0	0	0	0	0	0	0	0	0	0	0	0	0	0	0	0	0	0	5	0	0	0	0	0	0	0	0	0
Otu1371	0	0	0	0	0	0	0	0	0	0	0	0	0	0	0	0	0	0	0	0	0	0	0	0	0	0	0	0	0	0	0	0	0	0	0	0	0	0	0	0	0	0	0	0	0	0	5	0	0
Otu1372	0	5	0	0	0	0	0	0	0	0	0	0	0	0	0	0	0	0	0	0	0	0	0	0	0	0	0	0	0	0	0	0	0	0	0	0	0	0	0	0	0	0	0	0	0	0	0	0	0
Otu1373	0	0	5	0	0	0	0	0	0	0	0	0	0	0	0	0	0	0	0	0	0	0	0	0	0	0	0	0	0	0	0	0	0	0	0	0	0	0	0	0	0	0	0	0	0	0	0	0	0
Otu1374	0	0	2	0	0	3	0	0	0	0	0	0	0	0	0	0	0	0	0	0	0	0	0	0	0	0	0	0	0	0	0	0	0	0	0	0	0	0	0	0	0	0	0	0	0	0	0	0	0
Otu1375	0	0	0	0	0	0	0	0	0	0	0	0	0	0	0	0	0	3	0	0	0	0	0	0	0	0	0	0	0	1	0	0	0	0	0	0	0	0	0	1	0	0	0	0	0	0	0	0	0
Otu1376	0	0	0	0	0	0	0	0	0	0	0	0	0	0	0	0	0	0	0	0	0	0	0	0	0	0	0	0	0	0	0	0	0	0	0	0	0	0	0	0	0	0	0	0	0	0	0	0	0
Otu1377	0	0	0	0	0	0	0	0	0	0	0	0	0	0	0	0	0	0	0	0	0	0	0	0	0	0	0	0	0	0	0	0	0	0	0	0	0	2	0	0	0	0	0	0	0	0	0	0	0
Otu1378	0	0	0	0	0	0	0	0	0	0	0	0	2	0	0	0	0	0	3	0	0	0	0	0	0	0	0	0	0	0	0	0	0	0	0	0	0	0	0	0	0	0	0	0	0	0	0	0	0
Otu1379	0	0	0	0	0	0	5	0	0	0	0	0	0	0	0	0	0	0	0	0	0	0	0	0	0	0	0	0	0	0	0	0	0	0	0	0	0	0	0	0	0	0	0	0	0	0	0	0	0
Otu1380	0	0	0	0	0	0	0	0	0	0	0	0	0	0	0	0	0	0	0	0	0	0	0	0	0	0	0	0	0	0	0	0	0	0	0	0	0	0	0	0	0	0	5	0	0	0	0	0	0
Otu1381	0	0	0	0	0	0	0	5	0	0	0	0	0	0	0	0	0	0	0	0	0	0	0	0	0	0	0	0	0	0	0	0	0	0	0	0	0	0	0	0	0	0	0	0	0	0	0	0	0
Otu1382	0	0	0	0	0	0	0	0	0	0	0	0	0	0	0	0	0	0	0	0	0	0	0	0	0	0	0	0	5	0	0	0	0	0	0	0	0	0	0	0	0	0	0	0	0	0	0	0	0
Otu1383	0	0	0	0	0	0	0	0	0	0	0	0	0	0	0	0	0	0	0	0	0	0	0	0	0	0	0	0	0	0	0	0	0	0	0	0	0	0	0	0	0	0	0	0	0	0	1	0	0
Otu1384	0	0	0	0	0	0	0	0	0	0	0	0	0	0	0	0	0	0	0	0	0	0	0	0	0	0	0	0	0	0	0	0	0	0	0	0	0	0	0	0	0	0	5	0	0	0	0	0	0
Otu1385	0	0	0	0	0	0	0	0	0	0	0	0	0	0	0	0	0	0	0	0	0	0	2	0	0	0	0	0	2	0	0	0	0	0	1	0	0	0	0	0	0	0	0	0	0	0	0	0	0
Otu1386	0	0	0	0	0	0	0	0	0	5	0	0	0	0	0	0	0	0	0	0	0	0	0	0	0	0	0	0	0	0	0	0	0	0	0	0	0	0	0	0	0	0	0	0	0	0	0	0	0
Otu1387	0	0	0	0	0	0	0	0	0	5	0	0	0	0	0	0	0	0	0	0	0	0	0	0	0	0	0	0	0	0	0	0	0	0	0	0	0	0	0	0	0	0	0	0	0	0	0	0	0
Otu1388	0	0	0	0	0	0	0	5	0	0	0	0	0	0	0	0	0	0	0	0	0	0	0	0	0	0	0	0	0	0	0	0	0	0	0	0	0	0	0	0	0	0	0	0	0	0	0	0	0
Otu1389	0	0	0	0	0	0	0	0	0	0	0	0	0	0	0	0	0	0	0	0	0	0	0	0	0	0	0	0	0	0	0	0	0	0	0	0	0	0	0	0	0	0	0	0	0	0	0	0	0
Otu1390	0	0	0	0	0	0	0	0	0	3	0	0	0	0	0	0	0	0	0	0	0	0	0	0	0	0	0	0	0	0	0	0	0	0	0	0	0	0	0	1	0	0	0	0	0	0	0	0	0
Otu1391	0	0	0	0	0	0	0	0	0	0	5	0	0	0	0	0	0	0	0	0	0	0	0	0	0	0	0	0	0	0	0	0	0	0	0	0	0	0	0	0	0	0	0	0	0	0	0	0	0
Otu1392	0	0	0	0	0	0	0	0	0	0	5	0	0	0	0	0	0	0	0	0	0	0	0	0	0	0	0	0	0	0	0	0	0	0	0	0	0	0	0	0	0	0	0	0	0	0	0	0	0
Otu1393	0	0	0	0	0	0	0	0	0	0	0	0	0	0	0	0	0	0	0	0	0	2	0	0	0	0	0	0	0	0	0	0	0	0	0	0	0	0	0	2	0	0	1	0	0	0	0	0	0
Otu1394	0	0	0	0	0	0	0	0	0	0	0	0	0	0	0	0	0	0	0	0	0	0	0	0	0	0	0	0	0	0	0	5	0	0	0	0	0	0	0	0	0	0	0	0	0	0	0	0	0
Otu1395	0	0	0	0	0	0	0	0	0	0	0	0	0	0	0	0	0	0	0	0	0	0	0	0	0	0	0	0	0	0	0	0	0	0	0	0	0	0	0	3	0	0	0	0	2	0	0	0	0
Otu1396	0	0	0	0	0	0	0	0	0	0	0	0	0	0	0	0	0	0	0	0	0	0	0	0	0	0	0	0	0	0	0	0	0	0	0	0	0	0	0	0	0	0	0	0	0	0	1	0	0
Otu1397	0	0	0	5	0	0	0	0	0	0	0	0	0	0	0	0	0	0	0	0	0	0	0	0	0	0	0	0	0	0	0	0	0	0	0	0	0	0	0	0	0	0	0	0	0	0	0	0	0
Otu1398	0	5	0	0	0	0	0	0	0	0	0	0	0	0	0	0	0	0	0	0	0	0	0	0	0	0	0	0	0	0	0	0	0	0	0	0	0	0	0	0	0	0	0	0	0	0	0	0	0
Otu1399	0	5	0	0	0	0	0	0	0	0	0	0	0	0	0	0	0	0	0	0	0	0	0	0	0	0	0	0	0	0	0	0	0	0	0	0	0	0	0	0	0	0	0	0	0	0	0	0	0
Otu1400	0	0	0	0	0	0	0	0	0	0	0	0	0	0	0	0	0	0	0	0	0	0	0	0	0	0	0	0	0	0	0	3	0	0	0	0	0	0	0	0	0	0	0	0	0	0	0	0	0
Otu1401	5	0	0	0	0	0	0	0	0	0	0	0	0	0	0	0	0	0	0	0	0	0	0	0	0	0	0	0	0	0	0	0	0	0	0	0	0	0	0	0	0	0	0	0	0	0	0	0	0
Otu1402	0	0	0	0	0	0	0	0	0	0	0	0	0	0	0	0	0	0	0	0	0	0	0	0	0	0	0	0	0	0	0	0	0	0	0	0	0	0	0	0	0	0	0	0	0	0	0	0	0
Otu1403	0	0	5	0	0	0	0	0	0	0	0	0	0	0	0	0	0	0	0	0	0	0	0	0	0	0	0	0	0	0	0	0	0	0	0	0	0	0	0	0	0	0	0	0	0	0	0	0	0
Otu1404	0	0	0	0	0	0	0	0	0	0	0	0	0	0	0	0	2	0	3	0	0	0	0	0	0	0	0	0	0	0	0	0	0	0	0	0	0	0	0	0	0	0	0	0	0	0	0	0	0
Otu1405	0	0	0	0	0	0	0	0	0	0	0	0	5	0	0	0	0	0	0	0	0	0	0	0	0	0	0	0	0	0	0	0	0	0	0	0	0	0	0	0	0	0	0	0	0	0	0	0	0
Otu1406	0	0	0	0	0	0	0	0	0	0	0	0	0	0	0	0	0	0	0	5	0	0	0	0	0	0	0	0	0	0	0	0	0	0	0	0	0	0	0	0	0	0	0	0	0	0	0	0	0
Otu1407	0	0	0	0	0	0	0	0	0	0	0	0	0	0	0	0	0	0	0	0	0	0	0	2	0	0	0	0	0	0	0	0	1	0	0	0	0	0	1	0	0	0	1	0	0	0	0	0	0
Otu1408	0	0	0	0	0	0	0	0	0	0	0	0	0	0	0	0	0	0	0	0	0	0	0	0	0	0	0	0	0	0	0	0	0	0	0	0	0	0	0	0	0	0	0	0	0	0	0	0	0
Otu1409	0	0	0	0	0	0	0	0	0	0	0	0	0	0	0	0	0	0	0	0	0	0	0	0	1	0	0	0	0	0	0	0	0	0	0	4	0	0	0	0	0	0	0	0	0	0	0	0	0
Otu1410	0	0	0	0	0	5	0	0	0	0	0	0	0	0	0	0	0	0	0	0	0	0	0	0	0	0	0	0	0	0	0	0	0	0	0	0	0	0	0	0	0	0	0	0	0	0	0	0	0
Otu1411	0	0	0	0	0	0	0	0	0	0	0	0	0	0	0	0	0	0	0	0	0	0	0	0	1	0	0	0	0	0	0	0	0	0	0	0	0	0	0	0	0	0	0	0	0	0	0	0	0
Otu1412	0	0	0	0	0	0	0	0	0	0	0	0	0	0	0	0	0	0	0	0	0	0	0	0	0	0	0	0	0	0	0	0	0	0	0	0	0	0	0	0	0	0	0	0	0	0	0	0	0
Otu1413	0	0	0	0	0	0	0	0	0	0	0	0	0	0	0	0	0	0	0	0	0	0	0	0	0	0	0	0	0	0	0	4	0	0	0	0	0	0	0	0	0	1	0	0	0	0	0	0	0
Otu1414	0	0	0	0	0	5	0	0	0	0	0	0	0	0	0	0	0	0	0	0	0	0	0	0	0	0	0	0	0	0	0	0	0	0	0	0	0	0	0	0	0	0	0	0	0	0	0	0	0
Otu1415	0	0	0	0	0	0	0	0	0	0	0	0	0	0	0	0	0	0	0	0	0	0	0	0	0	0	0	0	0	0	0	0	0	0	0	0	0	0	0	0	0	0	0	0	0	0	0	0	0
Otu1416	0	0	0	0	0	0	2	0	0	0	0	0	0	0	0	0	0	0	3	0	0	0	0	0	0	0	0	0	0	0	0	0	0	0	0	0	0	0	0	0	0	0	0	0	0	0	0	0	0
Otu1417	0	0	0	0	0	0	0	0	0	0	0	0	0	0	0	0	0	0	0	0	0	0	0	0	0	0	0	0	0	0	0	0	0	0	0	0	0	0	0	5	0	0	0	0	0	0	0	0	0
Otu1418	0	0	0	0	0	0	0	0	0	0	0	0	0	0	0	0	0	0	0	0	0	0	0	0	0	0	0	0	0	0	0	0	0	0	0	0	0	0	0	0	0	0	0	0	0	0	0	0	0
Otu1419	0	0	0	0	0	0	0	0	0	0	0	0	0	0	0	0	0	0	0	0	0	2	0	0	0	0	0	0	0	0	0	2	0	0	0	0	0	0	0	0	1	0	0	0	0	0	0	0	0
Otu1420	0	0	0	0	0	0	0	0	0	0	0	0	0	0	0	0	0	0	0	0	0	0	0	0	0	0	0	0	0	0	0	0	0	0	0	0	0	0	0	0	0	0	0	0	0	0	0	0	0
Otu1421	0	0	0	0	0	0	0	0	0	0	0	0	0	0	0	0	0	0	0	0	0	0	0	0	0	0	0	0	0	0	0	0	0	0	0	0	0	0	0	0	0	0	0	0	0	0	1	0	0
Otu1422	0	0	0	0	0	0	0	0	0	0	0	0	0	0	0	0	0	0	0	0	0	0	0	0	0	0	0	0	0	0	0	0	0	0	0	0	0	0	0	5	0	0	0	0	0	0	0	0	0
Otu1423	0	0	0	5	0	0	0	0	0	0	0	0	0	0	0	0	0	0	0	0	0	0	0	0	0	0	0	0	0	0	0	0	0	0	0	0	0	0	0	0	0	0	0	0	0	0	0	0	0
Otu1424	0	0	0	0	0	0	0	0	0	0	0	0	0	0	0	0	0	0	0	0	0	0	1	0	0	0	1	0	0	0	0	0	0	0	0	0	0	0	0	0	0	0	0	0	1	0	0	0	0
Otu1425	0	0	0	0	0	0	0	0	0	0	0	0	0	0	0	0	0	0	0	0	0	0	0	0	0	0	0	0	0	0	0	0	0	0	0	0	0	0	0	0	0	0	0	0	0	5	0	0	0
Otu1426	0	0	0	0	0	0	0	0	0	0	0	0	0	0	0	0	0	0	0	0	0	0	0	1	0	0	0	0	0	0	0	0	0	0	0	0	0	0	0	0	0	0	0	0	0	0	0	0	0
Otu1427	0	0	0	0	0	0	0	0	0	0	0	0	0	0	0	0	0	0	0	0	0	0	0	0	0	0	0	0	0	0	0	1	0	0	0	0	0	0	0	0	0	0	0	0	0	0	0	0	0
Otu1428	0	5	0	0	0	0	0	0	0	0	0	0	0	0	0	0	0	0	0	0	0	0	0	0	0	0	0	0	0	0	0	0	0	0	0	0	0	0	0	0	0	0	0	0	0	0	0	0	0
Otu1429	0	0	0	0	0	0	0	0	0	0	0	0	0	0	0	0	0	0	0	0	0	0	0	0	0	0	0	0	0	0	0	0	1	0	0	2	0	0	0	0	0	0	0	0	0	0	0	0	0
Otu1430	0	0	0	0	0	0	0	0	0	0	0	0	0	0	0	0	0	0	0	0	0	0	0	0	0	0	0	0	0	0	0	0	0	0	0	0	0	0	0	0	0	0	1	0	0	0	1	0	0
Otu1431	0	0	0	0	0	0	0	0	0	0	0	0	0	0	0	0	0	0	0	0	0	1	0	0	0	0	0	0	0	0	0	0	0	0	0	0	0	0	0	0	0	0	0	0	0	0	0	0	0
Otu1432	0	0	0	5	0	0	0	0	0	0	0	0	0	0	0	0	0	0	0	0	0	0	0	0	0	0	0	0	0	0	0	0	0	0	0	0	0	0	0	0	0	0	0	0	0	0	0	0	0
Otu1433	0	0	0	0	0	0	0	0	0	0	0	0	0	0	0	0	0	0	0	0	0	2	1	0	0	0	0	0	0	0	0	0	0	0	2	0	0	0	0	0	0	0	0	0	0	0	0	0	0
Otu1434	0	0	0	0	0	0	0	0	0	0	0	0	0	0	0	0	0	0	0	0	0	0	0	0	0	0	0	0	0	0	0	0	0	0	0	0	0	0	0	0	0	0	0	0	0	0	0	0	0
Otu1435	0	0	0	0	0	0	0	0	0	0	0	0	0	0	0	0	0	0	0	0	0	0	0	0	0	0	0	0	1	0	0	0	0	0	0	0	0	1	0	0	0	0	0	0	0	0	0	0	0
Otu1436	0	0	0	0	0	0	0	0	0	0	0	0	0	0	0	0	0	0	0	0	0	0	0	0	0	0	0	0	0	0	0	0	0	0	0	0	0	0	0	0	0	0	0	0	1	0	3	0	0
Otu1437	0	0	0	0	0	0	0	0	0	0	0	0	0	0	0	0	0	0	0	0	0	0	0	0	0	0	0	0	0	0	0	0	0	0	0	0	0	0	0	0	0	0	0	0	0	0	0	0	0
Otu1438	0	0	0	0	0	0	0	0	0	0	0	0	0	0	0	0	0	0	0	0	0	0	0	1	0	0	0	0	0	0	0	0	0	0	0	0	0	0	0	0	0	0	0	0	0	0	0	0	0
Otu1439	0	0	0	0	0	0	1	0	0	0	0	0	0	0	0	0	0	0	0	0	0	0	0	0	0	0	0	0	0	0	0	0	0	0	0	0	0	0	0	0	0	0	3	0	0	0	0	0	0
Otu1440	0	0	0	0	0	0	4	0	0	0	0	0	0	0	0	0	0	0	0	0	0	0	0	0	0	0	0	0	0	0	0	0	0	0	0	0	0	0	0	0	0	0	0	0	0	0	0	0	0
Otu1441	0	0	0	0	0	0	0	0	0	0	0	0	0	0	0	0	0	0	0	0	0	0	0	0	0	0	0	0	0	0	0	0	0	0	0	0	0	0	0	0	0	0	0	0	0	0	0	0	0
Otu1442	0	0	0	0	0	0	0	0	0	0	0	0	0	0	0	0	0	0	0	0	0	0	0	0	0	0	0	0	0	0	0	0	0	0	0	0	0	0	0	0	0	0	0	0	0	2	0	0	0
Otu1443	0	0	0	0	0	0	0	0	0	0	0	0	0	0	0	0	0	0	0	0	0	0	0	0	0	0	0	0	0	0	0	0	0	0	0	0	0	0	0	0	0	0	0	0	0	0	0	0	0
Otu1444	0	0	0	0	0	0	0	0	0	0	0	0	0	0	0	0	0	0	0	0	0	0	0	0	0	0	0	0	0	0	0	0	0	0	0	0	0	0	0	0	0	0	0	0	0	0	0	0	0
Otu1445	0	4	0	0	0	0	0	0	0	0	0	0	0	0	0	0	0	0	0	0	0	0	0	0	0	0	0	0	0	0	0	0	0	0	0	0	0	0	0	0	0	0	0	0	0	0	0	0	0
Otu1446	0	0	0	0	0	0	0	0	0	0	0	0	0	0	0	0	0	0	0	0	0	0	0	0	0	0	0	0	0	0	0	0	0	0	0	1	0	0	0	3	0	0	0	0	0	0	0	0	0
Otu1447	0	0	0	0	0	0	0	0	0	0	0	0	0	0	0	0	0	0	0	0	0	0	0	0	0	0	0	0	0	0	0	1	0	0	0	0	0	0	0	0	0	0	0	0	0	0	0	0	0
Otu1448	0	0	0	0	0	0	0	0	0	0	0	0	0	0	0	0	0	0	0	0	0	0	0	0	0	0	0	0	0	0	0	0	0	0	0	0	0	0	0	4	0	0	0	0	0	0	0	0	0
Otu1449	0	0	0	0	0	0	0	0	0	0	0	0	0	0	0	4	0	0	0	0	0	0	0	0	0	0	0	0	0	0	0	0	0	0	0	0	0	0	0	0	0	0	0	0	0	0	0	0	0
Otu1450	0	0	0	0	0	0	0	0	0	0	0	0	0	0	0	0	0	0	0	0	0	0	0	0	0	0	0	0	0	0	0	0	0	0	0	0	0	0	0	0	0	0	4	0	0	0	0	0	0
Otu1451	0	0	0	0	0	0	4	0	0	0	0	0	0	0	0	0	0	0	0	0	0	0	0	0	0	0	0	0	0	0	0	0	0	0	0	0	0	0	0	0	0	0	0	0	0	0	0	0	0
Otu1452	0	0	0	0	0	0	0	0	0	0	0	0	0	0	0	0	0	0	0	0	0	0	0	0	0	0	0	0	0	0	0	2	0	0	0	0	0	1	0	1	0	0	0	0	0	0	0	0	0
Otu1453	0	0	4	0	0	0	0	0	0	0	0	0	0	0	0	0	0	0	0	0	0	0	0	0	0	0	0	0	0	0	0	0	0	0	0	0	0	0	0	0	0	0	0	0	0	0	0	0	0
Otu1454	0	0	0	0	0	0	0	0	0	0	0	0	0	0	0	0	0	0	0	0	0	0	0	4	0	0	0	0	0	0	0	0	0	0	0	0	0	0	0	0	0	0	0	0	0	0	0	0	0
Otu1455	4	0	0	0	0	0	0	0	0	0	0	0	0	0	0	0	0	0	0	0	0	0	0	0	0	0	0	0	0	0	0	0	0	0	0	0	0	0	0	0	0	0	0	0	0	0	0	0	0
Otu1456	0	0	0	0	0	0	0	0	0	0	0	0	0	0	0	2	0	0	0	0	0	0	0	0	0	0	0	0	0	0	0	0	0	0	0	0	0	0	0	0	0	0	0	0	0	0	0	0	0
Otu1457	0	0	0	0	0	4	0	0	0	0	0	0	0	0	0	0	0	0	0	0	0	0	0	0	0	0	0	0	0	0	0	0	0	0	0	0	0	0	0	0	0	0	0	0	0	0	0	0	0
Otu1458	0	0	0	4	0	0	0	0	0	0	0	0	0	0	0	0	0	0	0	0	0	0	0	0	0	0	0	0	0	0	0	0	0	0	0	0	0	0	0	0	0	0	0	0	0	0	0	0	0
Otu1459	0	0	0	0	0	0	0	0	0	0	0	0	0	0	0	0	0	0	0	0	0	0	0	0	0	0	0	0	0	0	0	0	1	0	0	1	0	0	0	0	0	0	0	0	0	0	0	0	0
Otu1460	0	0	0	0	0	0	0	0	0	0	0	0	0	0	0	0	0	0	0	0	0	0	0	0	0	0	0	0	0	0	0	0	0	0	0	0	0	0	0	0	0	0	0	0	0	0	0	0	0
Otu1461	0	0	0	0	0	0	0	0	0	0	0	0	0	0	0	0	0	0	4	0	0	0	0	0	0	0	0	0	0	0	0	0	0	0	0	0	0	0	0	0	0	0	0	0	0	0	0	0	0
Otu1462	0	0	0	0	0	0	0	0	0	0	0	0	0	0	0	0	0	0	0	0	0	0	0	0	0	0	0	0	0	0	0	4	0	0	0	0	0	0	0	0	0	0	0	0	0	0	0	0	0
Otu1463	0	0	0	0	0	0	0	0	0	0	0	0	0	0	0	0	0	0	0	0	0	0	0	0	1	0	0	0	0	0	0	0	0	2	1	0	0	0	0	0	0	0	0	0	0	0	0	0	0
Otu1464	0	0	0	0	0	0	0	0	0	3	0	0	0	1	0	0	0	0	0	0	0	0	0	0	0	0	0	0	0	0	0	0	0	0	0	0	0	0	0	0	0	0	0	0	0	0	0	0	0
Otu1465	0	0	0	0	0	0	0	0	0	0	0	0	0	0	0	0	0	0	0	0	0	0	0	0	0	0	0	0	0	0	0	0	0	0	0	0	0	0	0	0	0	0	0	0	0	0	0	0	0
Otu1466	0	0	0	0	0	0	0	0	0	0	0	0	0	0	0	0	0	0	0	0	0	0	0	0	0	0	0	0	4	0	0	0	0	0	0	0	0	0	0	0	0	0	0	0	0	0	0	0	0
Otu1467	0	0	0	0	0	0	0	0	0	0	0	0	0	0	0	0	0	0	0	4	0	0	0	0	0	0	0	0	0	0	0	0	0	0	0	0	0	0	0	0	0	0	0	0	0	0	0	0	0
Otu1468	0	0	0	0	4	0	0	0	0	0	0	0	0	0	0	0	0	0	0	0	0	0	0	0	0	0	0	0	0	0	0	0	0	0	0	0	0	0	0	0	0	0	0	0	0	0	0	0	0
Otu1469	0	0	0	3	0	0	0	0	0	0	0	0	0	0	0	0	0	0	0	0	0	0	0	0	0	0	0	0	0	0	0	0	0	0	0	0	0	0	0	0	0	0	0	0	0	0	0	0	0
Otu1470	0	0	0	0	0	0	0	0	0	0	0	0	0	0	0	0	0	0	0	0	0	0	2	0	0	0	0	0	0	0	0	0	0	0	0	0	0	0	0	0	0	0	0	0	0	0	0	0	0
Otu1471	0	0	0	0	0	0	0	0	0	0	0	0	0	0	0	0	0	0	0	0	0	0	0	0	2	0	0	0	0	0	0	0	0	0	0	0	0	0	2	0	0	0	0	0	0	0	0	0	0
Otu1472	0	0	0	4	0	0	0	0	0	0	0	0	0	0	0	0	0	0	0	0	0	0	0	0	0	0	0	0	0	0	0	0	0	0	0	0	0	0	0	0	0	0	0	0	0	0	0	0	0
Otu1473	0	0	0	0	0	0	3	0	0	0	0	0	0	0	0	1	0	0	0	0	0	0	0	0	0	0	0	0	0	0	0	0	0	0	0	0	0	0	0	0	0	0	0	0	0	0	0	0	0
Otu1474	0	0	0	0	0	0	0	0	0	0	0	0	0	0	0	0	0	0	0	0	0	0	0	0	0	0	0	0	0	0	0	0	0	0	0	0	0	0	0	0	0	0	0	0	0	0	0	0	0
Otu1475	0	0	0	0	0	0	0	0	0	0	0	0	0	0	0	4	0	0	0	0	0	0	0	0	0	0	0	0	0	0	0	0	0	0	0	0	0	0	0	0	0	0	0	0	0	0	0	0	0
Otu1476	0	0	0	0	0	0	0	0	0	0	0	0	0	0	0	0	0	0	0	0	0	0	0	0	0	0	0	0	0	0	0	0	0	0	0	0	0	0	0	0	0	0	4	0	0	0	0	0	0
Otu1477	0	0	0	0	0	0	0	0	0	0	0	0	0	0	0	0	0	0	0	0	0	0	0	0	0	0	0	0	0	0	0	0	2	0	0	0	0	0	0	0	0	0	0	0	0	0	0	0	0
Otu1478	0	0	0	0	4	0	0	0	0	0	0	0	0	0	0	0	0	0	0	0	0	0	0	0	0	0	0	0	0	0	0	0	0	0	0	0	0	0	0	0	0	0	0	0	0	0	0	0	0
Otu1479	0	0	0	0	0	0	0	0	0	0	0	0	0	0	0	0	0	0	0	0	0	0	0	0	0	0	0	0	0	0	0	0	0	0	0	0	0	0	0	0	0	0	0	0	0	0	0	0	0
Otu1480	0	0	0	0	0	0	0	0	0	0	0	0	0	0	0	0	0	0	0	0	0	0	0	0	0	0	0	0	0	0	0	0	0	0	0	0	0	0	0	0	0	0	0	0	0	0	0	0	0
Otu1481	0	0	0	0	0	0	0	0	0	0	0	0	0	0	0	0	0	0	0	0	0	0	0	0	0	0	0	0	0	0	0	2	0	0	0	0	0	0	0	0	0	0	0	0	0	0	0	0	0
Otu1482	0	0	0	0	0	0	0	0	0	0	0	0	0	0	1	0	0	0	0	0	1	0	0	0	0	0	0	0	0	0	0	0	0	0	0	0	0	0	0	0	0	0	0	0	0	0	0	0	1
Otu1483	0	0	0	0	0	0	0	0	0	0	4	0	0	0	0	0	0	0	0	0	0	0	0	0	0	0	0	0	0	0	0	0	0	0	0	0	0	0	0	0	0	0	0	0	0	0	0	0	0
Otu1484	0	0	0	0	0	0	0	0	0	0	0	0	0	0	0	0	0	0	0	0	0	0	0	0	0	0	0	0	0	0	0	0	0	0	0	0	0	0	0	3	1	0	0	0	0	0	0	0	0
Otu1485	0	0	0	4	0	0	0	0	0	0	0	0	0	0	0	0	0	0	0	0	0	0	0	0	0	0	0	0	0	0	0	0	0	0	0	0	0	0	0	0	0	0	0	0	0	0	0	0	0
Otu1486	0	0	0	0	0	0	0	0	0	0	0	0	4	0	0	0	0	0	0	0	0	0	0	0	0	0	0	0	0	0	0	0	0	0	0	0	0	0	0	0	0	0	0	0	0	0	0	0	0
Otu1487	0	0	0	0	0	0	0	0	0	0	0	0	0	0	0	0	0	0	0	0	0	0	0	0	0	0	0	0	0	0	0	0	0	0	0	0	0	0	0	0	0	0	0	0	0	0	0	0	0
Otu1488	0	0	0	0	0	0	0	0	0	0	0	0	0	0	0	0	0	0	4	0	0	0	0	0	0	0	0	0	0	0	0	0	0	0	0	0	0	0	0	0	0	0	0	0	0	0	0	0	0
Otu1489	0	0	0	0	0	0	0	0	0	0	0	0	0	0	0	0	0	0	4	0	0	0	0	0	0	0	0	0	0	0	0	0	0	0	0	0	0	0	0	0	0	0	0	0	0	0	0	0	0
Otu1490	0	0	0	0	0	0	0	0	0	0	0	0	0	0	0	0	0	0	4	0	0	0	0	0	0	0	0	0	0	0	0	0	0	0	0	0	0	0	0	0	0	0	0	0	0	0	0	0	0
Otu1491	0	0	0	0	0	0	0	0	0	0	0	0	0	0	0	0	0	0	0	0	0	0	0	0	0	0	0	0	0	0	0	0	0	0	1	0	0	0	0	0	0	0	0	0	0	0	0	0	0
Otu1492	0	0	0	0	0	0	0	0	0	0	0	0	0	0	0	0	0	0	0	0	0	0	0	0	0	0	0	0	2	0	0	0	0	0	2	0	0	0	0	0	0	0	0	0	0	0	0	0	0
Otu1493	0	0	0	0	0	0	0	0	0	0	0	0	4	0	0	0	0	0	0	0	0	0	0	0	0	0	0	0	0	0	0	0	0	0	0	0	0	0	0	0	0	0	0	0	0	0	0	0	0
Otu1494	0	0	0	0	0	0	0	0	0	0	0	0	0	0	0	0	0	0	0	2	1	0	0	0	0	0	0	0	0	0	0	0	0	0	0	0	0	0	0	1	0	0	0	0	0	0	0	0	0
Otu1495	0	0	0	0	0	0	0	0	0	0	0	0	0	0	0	0	0	0	0	0	0	0	0	0	0	0	0	0	0	0	0	4	0	0	0	0	0	0	0	0	0	0	0	0	0	0	0	0	0
Otu1496	0	0	0	0	0	0	0	0	0	0	0	0	0	0	0	0	0	0	0	0	0	0	0	0	0	0	0	0	0	0	0	0	0	0	0	0	0	0	0	0	0	0	3	0	0	0	0	0	0
Otu1497	0	0	0	0	0	0	0	0	0	4	0	0	0	0	0	0	0	0	0	0	0	0	0	0	0	0	0	0	0	0	0	0	0	0	0	0	0	0	0	0	0	0	0	0	0	0	0	0	0
Otu1498	0	0	0	0	0	0	0	0	0	0	0	0	0	0	0	0	0	0	0	0	0	0	0	0	0	0	0	0	0	0	2	0	0	0	0	1	0	0	0	0	0	0	0	0	0	0	0	0	0
Otu1499	0	0	0	0	0	0	0	0	0	0	0	0	0	0	0	0	0	0	0	0	0	1	0	0	0	0	0	0	0	0	0	0	0	0	0	0	0	0	0	2	1	0	0	0	0	0	0	0	0
Otu1500	0	0	0	0	0	0	0	0	0	0	0	0	0	0	0	0	0	0	0	0	0	1	0	0	0	0	0	0	2	0	0	0	0	0	0	0	0	0	0	1	0	0	0	0	0	0	0	0	0
Otu1501	0	0	0	0	0	0	0	0	0	0	0	0	0	0	0	0	0	0	0	0	0	1	0	0	0	0	0	0	0	0	0	0	0	2	0	1	0	0	0	0	0	0	0	0	0	0	0	0	0
Otu1502	0	0	0	0	0	0	0	0	0	0	0	0	0	0	2	0	0	0	0	0	0	0	0	0	0	0	0	1	0	0	0	0	0	0	0	0	0	0	0	0	0	1	0	0	0	0	0	0	0
Otu1503	0	0	0	0	0	0	0	0	0	0	0	0	0	0	0	0	0	0	0	0	0	0	0	0	0	0	0	0	0	0	0	0	0	0	0	4	0	0	0	0	0	0	0	0	0	0	0	0	0
Otu1504	0	0	0	0	0	0	0	0	0	0	0	0	0	0	0	4	0	0	0	0	0	0	0	0	0	0	0	0	0	0	0	0	0	0	0	0	0	0	0	0	0	0	0	0	0	0	0	0	0
Otu1505	0	0	0	0	0	0	4	0	0	0	0	0	0	0	0	0	0	0	0	0	0	0	0	0	0	0	0	0	0	0	0	0	0	0	0	0	0	0	0	0	0	0	0	0	0	0	0	0	0
Otu1506	2	0	0	2	0	0	0	0	0	0	0	0	0	0	0	0	0	0	0	0	0	0	0	0	0	0	0	0	0	0	0	0	0	0	0	0	0	0	0	0	0	0	0	0	0	0	0	0	0
Otu1507	0	0	0	0	0	0	0	0	0	0	0	0	0	0	0	4	0	0	0	0	0	0	0	0	0	0	0	0	0	0	0	0	0	0	0	0	0	0	0	0	0	0	0	0	0	0	0	0	0
Otu1508	0	0	0	0	0	0	0	0	0	0	0	0	0	0	0	0	0	0	0	0	0	0	0	0	0	0	0	0	0	0	0	0	0	0	0	0	0	0	0	0	0	0	0	0	0	0	0	0	0
Otu1509	0	0	0	0	0	0	0	0	0	0	0	0	0	0	0	0	0	0	0	0	0	0	0	2	0	0	0	0	0	0	0	1	0	0	1	0	0	0	0	0	0	0	0	0	0	0	0	0	0
Otu1510	0	0	0	0	0	0	0	0	0	0	0	0	0	0	0	0	0	0	0	0	0	0	0	0	0	0	0	0	0	0	0	0	0	0	0	0	0	0	0	0	0	0	0	0	0	0	0	0	0
Otu1511	0	0	0	0	0	0	0	0	0	0	0	0	0	0	0	0	4	0	0	0	0	0	0	0	0	0	0	0	0	0	0	0	0	0	0	0	0	0	0	0	0	0	0	0	0	0	0	0	0
Otu1512	0	0	0	0	0	0	0	0	0	0	0	0	0	0	0	0	0	0	0	0	0	0	0	0	0	0	0	0	0	0	0	0	0	0	0	0	0	0	0	0	0	0	0	0	0	0	0	0	0
Otu1513	0	0	0	0	4	0	0	0	0	0	0	0	0	0	0	0	0	0	0	0	0	0	0	0	0	0	0	0	0	0	0	0	0	0	0	0	0	0	0	0	0	0	0	0	0	0	0	0	0
Otu1514	0	0	0	0	0	0	0	0	0	0	0	0	0	0	0	0	0	0	0	0	0	0	0	0	0	0	0	0	4	0	0	0	0	0	0	0	0	0	0	0	0	0	0	0	0	0	0	0	0
Otu1515	0	0	0	0	0	0	0	0	0	0	0	0	0	0	0	0	0	0	0	0	0	0	0	0	0	0	0	0	0	0	0	0	0	0	0	0	0	0	0	0	0	0	0	0	0	0	0	0	0
Otu1516	0	0	0	0	0	0	0	0	0	0	0	0	0	0	0	0	0	0	0	0	0	0	0	0	0	0	0	0	0	0	0	0	0	0	0	0	0	0	0	0	0	0	0	0	0	0	0	0	0
Otu1517	0	0	0	0	0	0	0	0	0	0	0	0	0	0	0	0	0	0	0	0	0	0	0	0	0	0	0	0	0	0	0	0	0	0	0	0	0	0	0	0	0	0	0	0	0	0	0	0	0
Otu1518	0	0	0	0	0	0	0	0	0	0	0	0	0	0	0	0	0	0	0	4	0	0	0	0	0	0	0	0	0	0	0	0	0	0	0	0	0	0	0	0	0	0	0	0	0	0	0	0	0
Otu1519	0	0	0	0	0	0	0	0	0	0	0	0	0	0	0	0	0	0	0	0	0	0	0	0	0	0	0	0	0	0	0	0	0	0	0	0	0	0	0	0	0	0	0	0	0	0	0	0	0
Otu1520	0	0	0	0	0	0	0	0	0	0	0	0	0	0	0	0	0	0	0	0	0	0	0	0	0	0	0	0	0	0	0	0	0	0	1	0	0	3	0	0	0	0	0	0	0	0	0	0	0
Otu1521	4	0	0	0	0	0	0	0	0	0	0	0	0	0	0	0	0	0	0	0	0	0	0	0	0	0	0	0	0	0	0	0	0	0	0	0	0	0	0	0	0	0	0	0	0	0	0	0	0
Otu1522	0	0	0	0	0	0	0	0	0	0	0	0	0	0	0	0	0	0	0	0	0	0	0	0	0	0	0	0	0	0	0	0	0	0	0	0	0	0	0	0	0	0	0	0	0	0	0	0	0
Otu1523	0	0	0	0	0	0	0	0	0	0	0	0	0	0	0	0	0	0	0	0	0	0	0	0	0	0	0	0	0	0	0	0	0	0	0	0	0	0	1	0	0	0	0	0	0	0	0	0	0
Otu1524	0	0	0	0	0	0	0	0	0	0	0	0	0	0	0	0	0	0	0	0	0	0	0	0	0	0	0	2	0	0	0	1	0	0	0	0	0	0	0	1	0	0	0	0	0	0	0	0	0
Otu1525	0	4	0	0	0	0	0	0	0	0	0	0	0	0	0	0	0	0	0	0	0	0	0	0	0	0	0	0	0	0	0	0	0	0	0	0	0	0	0	0	0	0	0	0	0	0	0	0	0
Otu1526	0	0	0	0	0	0	0	0	0	0	0	0	0	0	0	0	0	0	0	0	0	0	0	0	0	0	0	0	0	0	0	0	0	0	0	0	0	0	0	0	0	0	0	0	0	0	0	0	0
Otu1527	0	0	0	0	0	0	0	0	0	0	0	0	0	0	0	0	0	0	0	0	0	0	0	0	0	0	0	0	0	0	0	0	4	0	0	0	0	0	0	0	0	0	0	0	0	0	0	0	0
Otu1528	0	0	0	0	0	0	0	0	0	0	0	0	0	0	0	0	0	0	4	0	0	0	0	0	0	0	0	0	0	0	0	0	0	0	0	0	0	0	0	0	0	0	0	0	0	0	0	0	0
Otu1529	0	0	0	0	0	0	0	0	0	0	0	0	0	0	0	0	0	0	0	0	0	0	0	4	0	0	0	0	0	0	0	0	0	0	0	0	0	0	0	0	0	0	0	0	0	0	0	0	0
Otu1530	0	0	0	0	0	0	0	0	0	0	0	0	0	0	0	0	0	0	0	0	0	0	0	0	0	0	0	0	0	0	0	0	0	0	0	0	0	0	0	0	0	0	0	0	0	0	0	0	0
Otu1531	0	0	0	0	0	0	0	0	0	0	0	0	0	0	0	0	0	0	0	0	0	0	0	0	0	0	0	0	3	0	0	0	0	0	1	0	0	0	0	0	0	0	0	0	0	0	0	0	0
Otu1532	0	0	0	0	0	0	0	0	0	0	0	0	0	0	0	0	0	0	0	0	0	0	0	0	0	0	0	0	0	0	0	0	0	0	0	0	0	0	0	4	0	0	0	0	0	0	0	0	0
Otu1533	0	0	0	0	0	0	0	0	0	0	0	0	0	0	0	0	0	0	0	0	0	0	0	0	0	0	0	0	0	0	0	1	0	0	0	0	0	0	0	0	0	0	0	0	3	0	0	0	0
Otu1534	0	0	0	0	0	0	0	0	0	0	0	0	0	0	4	0	0	0	0	0	0	0	0	0	0	0	0	0	0	0	0	0	0	0	0	0	0	0	0	0	0	0	0	0	0	0	0	0	0
Otu1535	0	0	0	0	0	0	0	0	0	0	0	0	0	0	0	0	0	0	0	0	0	0	0	0	0	0	0	0	0	0	0	0	0	0	0	0	0	0	0	0	0	0	0	0	0	0	0	0	0
Otu1536	0	0	0	0	0	0	0	0	0	0	0	0	0	4	0	0	0	0	0	0	0	0	0	0	0	0	0	0	0	0	0	0	0	0	0	0	0	0	0	0	0	0	0	0	0	0	0	0	0
Otu1537	0	0	0	4	0	0	0	0	0	0	0	0	0	0	0	0	0	0	0	0	0	0	0	0	0	0	0	0	0	0	0	0	0	0	0	0	0	0	0	0	0	0	0	0	0	0	0	0	0
Otu1538	0	0	0	0	0	0	0	0	0	0	0	0	0	0	0	0	0	0	0	0	0	0	0	0	0	0	0	0	0	0	0	0	0	0	0	0	0	0	0	0	0	0	0	0	0	0	0	0	0
Otu1539	0	0	0	0	0	0	0	0	0	0	0	0	0	0	0	0	0	0	0	0	0	0	0	0	0	0	0	4	0	0	0	0	0	0	0	0	0	0	0	0	0	0	0	0	0	0	0	0	0
Otu1540	0	0	0	0	0	0	0	0	0	0	0	0	0	0	0	0	0	0	0	0	0	0	0	0	0	0	0	0	0	0	0	0	0	0	0	0	0	0	0	0	0	0	0	0	0	0	4	0	0
Otu1541	0	0	0	0	0	0	0	0	0	0	0	0	0	0	0	0	0	0	0	0	0	0	0	0	0	0	0	0	0	0	0	0	0	0	0	0	0	0	0	0	0	0	0	0	0	0	0	0	0
Otu1542	0	0	0	0	0	0	0	0	0	0	0	0	0	0	0	0	0	0	0	0	0	0	0	0	0	0	0	0	0	0	0	0	0	0	0	0	0	1	1	0	0	0	0	0	0	0	0	0	0
Otu1543	0	0	0	0	0	0	0	0	0	0	0	0	0	0	0	0	0	0	0	0	0	0	0	0	0	0	0	0	0	0	0	0	0	0	0	0	0	0	0	0	0	0	0	1	0	0	0	0	0
Otu1544	0	0	0	0	0	0	0	0	0	0	0	0	0	0	0	0	0	0	0	0	0	0	0	0	0	0	0	0	0	0	0	0	0	0	0	0	0	0	0	0	0	3	0	0	0	0	0	0	0
Otu1545	0	0	0	0	0	0	0	0	0	0	0	0	0	0	0	0	0	0	0	0	0	0	0	0	0	0	0	0	0	0	0	1	0	0	0	0	0	0	0	0	0	0	0	0	0	0	0	0	0
Otu1546	0	0	0	0	0	0	0	0	0	0	0	0	0	0	0	4	0	0	0	0	0	0	0	0	0	0	0	0	0	0	0	0	0	0	0	0	0	0	0	0	0	0	0	0	0	0	0	0	0
Otu1547	0	0	0	1	0	0	0	0	0	0	1	0	0	0	0	0	1	0	0	1	0	0	0	0	0	0	0	0	0	0	0	0	0	0	0	0	0	0	0	0	0	0	0	0	0	0	0	0	0
Otu1548	0	0	0	0	0	0	0	0	0	0	0	0	0	0	0	0	0	0	0	0	0	0	0	0	0	0	0	0	0	0	0	0	0	0	0	0	0	0	0	0	0	0	0	0	0	0	0	0	0
Otu1549	0	0	0	0	0	0	0	0	0	0	0	0	0	0	0	0	0	0	4	0	0	0	0	0	0	0	0	0	0	0	0	0	0	0	0	0	0	0	0	0	0	0	0	0	0	0	0	0	0
Otu1550	0	0	0	0	0	0	0	0	0	0	0	0	0	0	0	0	0	0	0	0	0	0	0	0	0	0	0	0	0	0	0	0	0	0	4	0	0	0	0	0	0	0	0	0	0	0	0	0	0
Otu1551	0	0	0	0	0	0	0	0	0	0	0	0	0	0	0	0	0	0	0	0	0	0	0	0	0	0	0	0	0	0	0	0	0	0	0	0	0	0	0	0	0	0	0	0	4	0	0	0	0
Otu1552	0	0	0	0	0	0	0	0	0	0	0	0	0	0	0	0	0	0	0	0	0	0	0	0	0	0	0	0	0	0	0	0	0	0	0	0	0	0	0	0	0	0	2	0	0	0	0	0	0
Otu1553	0	0	0	0	0	0	0	0	0	0	0	0	0	0	0	0	0	0	0	0	0	0	0	0	0	0	0	0	0	0	0	0	0	0	0	0	0	0	0	0	0	0	0	0	0	0	0	0	0
Otu1554	0	0	0	0	0	0	0	0	0	0	0	0	0	0	0	0	0	0	0	0	0	0	0	0	0	0	0	0	0	0	0	0	0	0	0	0	0	0	0	0	0	0	0	0	0	0	0	0	0
Otu1555	0	0	0	0	0	0	0	0	0	0	0	0	0	0	0	0	0	0	0	0	0	0	0	0	0	0	2	0	0	0	0	0	0	0	2	0	0	0	0	0	0	0	0	0	0	0	0	0	0
Otu1556	0	0	0	0	0	0	0	0	0	0	0	0	0	0	0	0	0	0	0	0	0	0	0	0	0	0	0	0	0	0	0	0	0	0	0	0	0	0	0	0	0	0	0	0	0	0	0	0	0
Otu1557	0	0	0	0	0	0	0	0	0	0	0	0	0	0	0	0	0	0	0	0	0	0	0	0	0	0	0	0	0	1	0	1	0	0	0	0	2	0	0	0	0	0	0	0	0	0	0	0	0
Otu1558	0	0	0	0	0	0	0	0	0	0	0	0	0	0	0	0	0	0	0	0	0	0	0	0	1	0	0	0	0	1	0	0	0	0	0	0	0	0	1	0	1	0	0	0	0	0	0	0	0
Otu1559	0	0	0	0	3	0	0	0	0	0	0	0	0	0	0	0	0	0	0	0	1	0	0	0	0	0	0	0	0	0	0	0	0	0	0	0	0	0	0	0	0	0	0	0	0	0	0	0	0
Otu1560	0	0	0	4	0	0	0	0	0	0	0	0	0	0	0	0	0	0	0	0	0	0	0	0	0	0	0	0	0	0	0	0	0	0	0	0	0	0	0	0	0	0	0	0	0	0	0	0	0
Otu1561	0	0	0	0	0	0	0	4	0	0	0	0	0	0	0	0	0	0	0	0	0	0	0	0	0	0	0	0	0	0	0	0	0	0	0	0	0	0	0	0	0	0	0	0	0	0	0	0	0
Otu1562	0	0	0	0	0	0	0	0	0	0	0	0	0	0	0	1	0	0	0	0	0	0	0	0	1	0	0	0	2	0	0	0	0	0	0	0	0	0	0	0	0	0	0	0	0	0	0	0	0
Otu1563	0	0	0	0	0	0	0	0	0	0	0	0	0	0	0	0	0	0	0	0	0	0	0	0	2	0	0	0	0	0	0	0	0	0	0	0	0	1	0	0	0	1	0	0	0	0	0	0	0
Otu1564	0	0	0	0	0	2	2	0	0	0	0	0	0	0	0	0	0	0	0	0	0	0	0	0	0	0	0	0	0	0	0	0	0	0	0	0	0	0	0	0	0	0	0	0	0	0	0	0	0
Otu1565	4	0	0	0	0	0	0	0	0	0	0	0	0	0	0	0	0	0	0	0	0	0	0	0	0	0	0	0	0	0	0	0	0	0	0	0	0	0	0	0	0	0	0	0	0	0	0	0	0
Otu1566	0	0	0	0	0	0	0	0	0	0	0	0	0	0	0	0	0	0	0	0	0	0	0	0	0	0	0	0	0	0	0	0	0	0	0	0	0	0	0	0	0	0	0	0	0	0	0	0	0
Otu1567	0	0	0	0	0	0	0	0	0	0	0	0	0	0	0	4	0	0	0	0	0	0	0	0	0	0	0	0	0	0	0	0	0	0	0	0	0	0	0	0	0	0	0	0	0	0	0	0	0
Otu1568	4	0	0	0	0	0	0	0	0	0	0	0	0	0	0	0	0	0	0	0	0	0	0	0	0	0	0	0	0	0	0	0	0	0	0	0	0	0	0	0	0	0	0	0	0	0	0	0	0
Otu1569	0	0	0	0	0	0	0	0	0	0	0	0	0	0	0	0	0	0	4	0	0	0	0	0	0	0	0	0	0	0	0	0	0	0	0	0	0	0	0	0	0	0	0	0	0	0	0	0	0
Otu1570	0	0	0	0	0	0	0	0	0	0	0	0	0	0	0	0	0	0	0	0	0	0	0	0	0	0	0	0	0	0	0	0	0	0	0	0	0	0	0	0	0	0	0	0	0	0	0	0	0
Otu1571	0	0	0	0	4	0	0	0	0	0	0	0	0	0	0	0	0	0	0	0	0	0	0	0	0	0	0	0	0	0	0	0	0	0	0	0	0	0	0	0	0	0	0	0	0	0	0	0	0
Otu1572	0	0	0	0	0	0	0	0	0	0	0	0	0	0	0	0	0	0	0	0	0	0	0	0	0	0	0	0	0	0	0	2	0	0	0	0	0	0	0	0	0	0	0	0	2	0	0	0	0
Otu1573	0	0	0	0	0	0	0	0	0	0	0	0	0	0	0	4	0	0	0	0	0	0	0	0	0	0	0	0	0	0	0	0	0	0	0	0	0	0	0	0	0	0	0	0	0	0	0	0	0
Otu1574	0	0	0	0	0	0	0	0	0	0	0	0	0	0	0	0	0	0	0	0	0	0	0	0	0	0	0	0	0	0	0	0	0	0	0	0	0	0	0	0	0	0	0	0	0	0	0	0	0
Otu1575	0	0	0	0	0	0	0	0	0	0	0	0	0	0	0	0	0	0	0	0	0	0	0	0	0	0	0	0	0	0	0	0	0	0	0	0	0	0	1	0	0	0	0	0	0	0	0	0	0
Otu1576	0	0	0	0	0	0	0	0	0	0	0	0	0	0	0	0	0	0	0	0	0	0	0	0	0	0	0	0	0	0	0	0	0	0	0	0	0	0	0	0	0	0	0	0	0	0	0	0	0
Otu1577	0	0	0	0	0	0	0	0	0	0	0	0	0	0	0	0	0	0	0	0	0	0	0	0	0	0	0	0	0	0	0	0	0	0	0	0	0	0	0	0	0	4	0	0	0	0	0	0	0
Otu1578	0	0	0	0	0	0	0	0	0	4	0	0	0	0	0	0	0	0	0	0	0	0	0	0	0	0	0	0	0	0	0	0	0	0	0	0	0	0	0	0	0	0	0	0	0	0	0	0	0
Otu1579	3	0	0	0	0	0	1	0	0	0	0	0	0	0	0	0	0	0	0	0	0	0	0	0	0	0	0	0	0	0	0	0	0	0	0	0	0	0	0	0	0	0	0	0	0	0	0	0	0
Otu1580	0	0	0	0	0	0	0	0	0	0	0	0	0	0	0	0	0	0	0	0	0	0	0	0	0	0	0	0	0	0	0	0	0	0	0	0	0	0	0	4	0	0	0	0	0	0	0	0	0
Otu1581	0	0	0	0	0	0	0	0	0	0	0	0	0	0	0	0	0	0	0	0	0	0	0	0	0	0	0	0	0	0	0	0	0	0	0	0	0	0	0	0	0	0	0	0	0	0	0	0	0
Otu1582	0	0	0	0	0	0	0	0	0	0	0	0	0	0	0	0	4	0	0	0	0	0	0	0	0	0	0	0	0	0	0	0	0	0	0	0	0	0	0	0	0	0	0	0	0	0	0	0	0
Otu1583	0	0	0	0	0	0	0	0	0	0	0	0	0	0	0	0	0	0	0	0	0	0	0	4	0	0	0	0	0	0	0	0	0	0	0	0	0	0	0	0	0	0	0	0	0	0	0	0	0
Otu1584	0	0	0	0	0	0	0	0	0	0	0	0	0	0	0	0	0	0	0	0	0	1	0	0	0	0	0	0	0	0	0	0	0	0	0	0	0	0	0	0	0	0	0	0	0	0	0	0	0
Otu1585	1	0	0	0	0	0	0	0	0	3	0	0	0	0	0	0	0	0	0	0	0	0	0	0	0	0	0	0	0	0	0	0	0	0	0	0	0	0	0	0	0	0	0	0	0	0	0	0	0
Otu1586	0	0	0	0	0	0	4	0	0	0	0	0	0	0	0	0	0	0	0	0	0	0	0	0	0	0	0	0	0	0	0	0	0	0	0	0	0	0	0	0	0	0	0	0	0	0	0	0	0
Otu1587	0	0	0	0	0	0	0	0	0	0	0	0	0	0	0	0	0	0	0	0	0	0	0	0	0	0	0	0	0	0	0	0	0	0	0	0	0	0	0	0	0	0	0	0	2	0	0	0	0
Otu1588	0	0	0	0	0	0	0	0	0	0	0	0	0	0	0	0	0	0	0	0	0	0	0	0	0	0	0	0	0	0	0	0	0	0	0	0	0	0	0	0	0	0	0	0	0	0	0	0	0
Otu1589	0	0	0	0	0	0	0	0	0	0	0	0	0	0	0	4	0	0	0	0	0	0	0	0	0	0	0	0	0	0	0	0	0	0	0	0	0	0	0	0	0	0	0	0	0	0	0	0	0
Otu1590	0	0	0	0	0	0	0	0	0	0	0	0	0	0	0	0	0	0	0	0	0	0	1	0	0	1	0	0	0	0	0	0	0	0	0	0	0	0	0	0	0	0	0	0	0	0	0	0	0
Otu1591	0	0	0	0	0	0	0	0	0	0	0	0	0	0	0	0	0	1	0	0	0	0	0	0	0	0	0	0	0	0	0	0	0	0	0	0	0	0	1	0	0	0	0	0	0	0	0	0	0
Otu1592	0	0	0	0	0	0	0	0	0	0	0	0	0	0	0	0	0	0	0	0	0	0	0	0	0	0	0	0	0	0	0	0	0	0	0	0	0	4	0	0	0	0	0	0	0	0	0	0	0
Otu1593	0	0	0	0	0	0	0	0	0	0	0	0	0	0	0	0	0	0	0	0	0	0	0	0	0	0	0	0	0	0	0	0	0	0	0	0	0	0	0	0	0	0	2	1	0	0	0	0	0
Otu1594	0	0	0	0	0	0	0	0	0	0	0	0	0	0	0	0	0	0	0	0	0	0	0	0	0	0	0	0	0	0	0	0	0	0	0	0	0	0	0	4	0	0	0	0	0	0	0	0	0
Otu1595	0	0	0	0	0	0	0	0	0	0	0	0	0	0	0	0	0	0	0	0	0	0	0	0	0	0	0	0	0	0	0	0	0	0	0	0	0	0	0	0	0	0	0	0	0	0	0	0	2
Otu1596	0	0	0	0	0	0	0	0	0	4	0	0	0	0	0	0	0	0	0	0	0	0	0	0	0	0	0	0	0	0	0	0	0	0	0	0	0	0	0	0	0	0	0	0	0	0	0	0	0
Otu1597	0	0	0	0	0	0	0	0	0	0	0	0	0	0	0	4	0	0	0	0	0	0	0	0	0	0	0	0	0	0	0	0	0	0	0	0	0	0	0	0	0	0	0	0	0	0	0	0	0
Otu1598	0	0	0	0	0	0	0	0	0	0	0	0	0	0	0	0	0	0	0	0	0	0	0	0	0	0	0	2	0	0	0	0	0	0	2	0	0	0	0	0	0	0	0	0	0	0	0	0	0
Otu1599	0	0	0	0	0	0	0	0	0	0	0	0	0	0	0	0	4	0	0	0	0	0	0	0	0	0	0	0	0	0	0	0	0	0	0	0	0	0	0	0	0	0	0	0	0	0	0	0	0
Otu1600	0	0	0	0	0	0	0	0	0	0	0	0	4	0	0	0	0	0	0	0	0	0	0	0	0	0	0	0	0	0	0	0	0	0	0	0	0	0	0	0	0	0	0	0	0	0	0	0	0
Otu1601	0	0	0	0	0	0	0	0	0	0	0	0	0	0	0	0	0	0	0	0	0	2	0	1	0	0	0	0	0	0	0	0	0	0	0	0	0	0	0	0	0	0	0	0	0	0	0	0	0
Otu1602	0	0	0	0	0	0	0	0	0	0	0	0	0	0	0	0	0	0	0	0	0	4	0	0	0	0	0	0	0	0	0	0	0	0	0	0	0	0	0	0	0	0	0	0	0	0	0	0	0
Otu1603	0	0	0	0	0	0	0	0	0	0	0	0	0	0	0	0	0	0	0	0	0	0	0	0	0	0	0	0	0	0	0	4	0	0	0	0	0	0	0	0	0	0	0	0	0	0	0	0	0
Otu1604	0	0	0	0	0	0	0	0	0	0	0	0	0	0	0	0	0	0	0	0	0	0	0	0	0	0	0	0	0	0	0	0	0	0	0	0	0	0	0	0	0	0	0	0	0	0	0	0	0
Otu1605	0	0	0	0	0	0	0	0	0	0	0	0	0	0	1	0	0	0	0	0	0	0	0	0	0	0	0	0	0	0	0	0	0	0	0	0	0	2	1	0	0	0	0	0	0	0	0	0	0
Otu1606	0	0	0	0	0	0	0	0	0	4	0	0	0	0	0	0	0	0	0	0	0	0	0	0	0	0	0	0	0	0	0	0	0	0	0	0	0	0	0	0	0	0	0	0	0	0	0	0	0
Otu1607	0	0	0	0	0	0	0	0	0	0	0	0	0	0	0	0	0	0	0	0	0	0	0	0	0	0	0	0	0	0	0	0	0	0	0	0	0	0	0	0	0	0	0	0	0	0	0	0	0
Otu1608	0	4	0	0	0	0	0	0	0	0	0	0	0	0	0	0	0	0	0	0	0	0	0	0	0	0	0	0	0	0	0	0	0	0	0	0	0	0	0	0	0	0	0	0	0	0	0	0	0
Otu1609	0	0	0	0	0	0	0	0	0	0	0	0	0	0	0	0	0	0	4	0	0	0	0	0	0	0	0	0	0	0	0	0	0	0	0	0	0	0	0	0	0	0	0	0	0	0	0	0	0
Otu1610	0	0	0	0	0	0	0	0	0	0	0	0	0	0	0	0	0	0	0	0	0	0	0	0	0	0	0	0	0	0	0	0	0	0	0	0	0	0	0	0	0	0	0	0	0	0	0	0	0
Otu1611	0	0	0	0	0	0	0	0	0	0	0	0	0	0	0	0	0	0	0	0	0	0	0	0	0	0	0	0	4	0	0	0	0	0	0	0	0	0	0	0	0	0	0	0	0	0	0	0	0
Otu1612	0	0	0	0	0	0	0	0	0	0	0	0	0	0	0	0	0	0	0	0	0	0	0	0	0	0	0	0	0	0	0	0	0	0	0	0	0	0	0	0	0	0	0	0	0	0	0	0	0
Otu1613	0	0	0	0	0	0	0	0	0	0	0	0	0	0	0	0	0	0	0	0	0	0	0	0	0	0	0	0	0	0	0	0	0	0	0	0	0	0	0	0	0	0	0	0	0	0	0	0	0
Otu1614	0	0	0	0	0	0	0	0	0	0	0	0	0	0	0	0	0	0	0	0	0	0	0	0	0	0	0	0	0	0	0	0	0	0	0	0	0	0	0	0	0	0	0	0	0	0	4	0	0
Otu1615	0	0	0	0	0	0	0	0	0	0	0	0	0	1	0	0	0	0	0	0	0	1	0	0	0	0	0	0	0	0	0	0	0	0	0	0	0	0	0	0	0	0	0	0	0	0	1	0	0
Otu1616	0	0	0	0	0	0	0	0	0	0	0	0	0	0	0	0	0	0	0	0	0	0	0	0	0	0	0	0	0	0	0	0	0	0	0	1	0	0	0	0	0	0	0	0	0	0	0	0	0
Otu1617	0	0	0	0	0	0	0	0	0	0	0	0	0	0	0	0	0	0	0	0	0	0	0	0	0	0	0	0	0	0	0	0	0	0	0	0	0	0	0	0	0	0	0	0	0	3	0	0	0
Otu1618	0	0	0	0	0	0	0	0	0	0	0	0	0	0	0	0	0	0	0	0	0	0	0	0	0	0	0	0	0	0	0	0	0	0	0	0	0	0	0	0	0	0	0	0	0	0	0	0	0
Otu1619	0	0	0	0	0	0	0	0	0	0	0	0	0	0	0	0	0	0	0	0	0	0	0	0	0	0	0	0	0	1	0	0	0	1	0	0	0	0	2	0	0	0	0	0	0	0	0	0	0
Otu1620	0	0	0	0	0	0	0	0	0	0	0	0	0	0	0	0	0	0	0	0	0	0	0	0	0	0	0	0	0	0	0	4	0	0	0	0	0	0	0	0	0	0	0	0	0	0	0	0	0
Otu1621	0	0	0	0	0	0	0	0	0	0	0	0	0	0	0	0	0	0	0	0	0	0	0	0	0	0	0	0	0	0	0	0	0	0	0	0	0	0	0	0	0	0	0	3	0	0	0	0	0
Otu1622	0	0	0	0	0	0	0	0	0	0	0	0	0	0	0	0	0	0	0	0	0	0	0	0	0	0	0	0	0	0	0	0	0	0	0	0	0	0	0	0	0	0	0	0	0	0	0	0	0
Otu1623	0	0	0	0	0	0	0	0	0	0	0	0	0	0	0	0	0	0	0	0	0	0	0	0	0	0	0	0	0	0	0	0	0	0	0	0	0	0	0	0	0	0	0	0	0	0	3	0	0
Otu1624	0	0	0	0	0	0	0	0	0	0	0	0	0	0	0	0	0	0	0	0	0	0	0	0	0	0	0	1	0	0	0	0	0	1	0	0	0	0	0	0	0	0	0	0	0	0	0	0	0
Otu1625	0	0	0	0	0	0	0	0	0	0	0	0	0	0	0	0	0	0	0	0	0	0	0	0	0	0	0	1	0	0	0	0	0	0	0	0	0	0	0	0	0	0	0	0	0	0	0	1	0
Otu1626	0	0	0	0	0	0	0	0	0	0	0	0	0	0	0	0	0	0	0	0	0	0	0	1	0	0	0	0	0	0	0	0	0	0	0	0	0	0	0	0	0	0	0	0	0	0	0	0	0
Otu1627	0	0	0	0	0	0	0	0	0	0	0	0	0	0	0	0	0	0	0	0	0	0	0	0	0	0	0	0	0	0	0	0	0	0	0	0	0	3	0	0	0	0	0	0	0	0	0	0	0
Otu1628	0	0	0	0	0	0	0	0	0	0	0	0	0	0	0	0	0	0	0	0	0	0	0	0	0	0	0	0	0	0	0	0	0	0	0	0	0	0	0	0	0	0	0	0	0	0	0	0	0
Otu1629	3	0	0	0	0	0	0	0	0	0	0	0	0	0	0	0	0	0	0	0	0	0	0	0	0	0	0	0	0	0	0	0	0	0	0	0	0	0	0	0	0	0	0	0	0	0	0	0	0
Otu1630	0	0	0	0	0	0	0	0	0	0	0	0	0	0	0	0	0	0	0	0	0	0	0	0	0	0	0	0	0	0	0	0	0	0	0	0	0	0	0	0	0	0	0	0	0	0	0	0	0
Otu1631	0	0	0	0	0	0	0	0	0	0	0	0	0	0	0	0	0	0	0	0	0	0	0	0	0	2	0	0	0	0	1	0	0	0	0	0	0	0	0	0	0	0	0	0	0	0	0	0	0
Otu1632	0	0	0	0	0	0	0	0	0	0	0	0	0	0	0	0	0	0	0	0	0	0	2	0	1	0	0	0	0	0	0	0	0	0	0	0	0	0	0	0	0	0	0	0	0	0	0	0	0
Otu1633	0	0	0	0	0	0	0	0	0	0	0	0	0	0	0	0	0	0	0	0	0	0	0	2	0	0	0	0	0	0	0	0	0	1	0	0	0	0	0	0	0	0	0	0	0	0	0	0	0
Otu1634	0	0	0	0	0	0	0	0	0	0	0	0	0	0	0	0	0	0	0	0	0	0	0	0	0	0	0	0	0	0	0	0	0	0	0	0	0	0	0	0	0	0	0	0	0	0	0	0	0
Otu1635	0	0	0	0	0	0	0	0	0	0	0	0	0	0	0	0	0	0	3	0	0	0	0	0	0	0	0	0	0	0	0	0	0	0	0	0	0	0	0	0	0	0	0	0	0	0	0	0	0
Otu1636	0	0	0	0	0	0	0	0	0	3	0	0	0	0	0	0	0	0	0	0	0	0	0	0	0	0	0	0	0	0	0	0	0	0	0	0	0	0	0	0	0	0	0	0	0	0	0	0	0
Otu1637	0	0	0	0	0	0	0	0	0	0	0	0	0	0	0	0	0	0	0	0	0	3	0	0	0	0	0	0	0	0	0	0	0	0	0	0	0	0	0	0	0	0	0	0	0	0	0	0	0
Otu1638	0	0	1	0	0	0	0	0	0	0	0	0	0	0	0	1	0	0	0	0	0	0	0	0	0	0	0	0	0	0	0	0	0	0	0	0	0	0	0	0	0	0	0	0	0	0	0	0	0
Otu1639	0	0	0	0	0	0	0	0	0	0	0	0	0	0	0	0	0	0	0	0	0	0	0	0	0	0	0	0	0	0	0	0	0	0	0	0	0	0	0	0	0	0	0	0	0	0	0	0	0
Otu1640	0	0	0	0	0	0	0	0	0	0	0	0	0	0	0	0	3	0	0	0	0	0	0	0	0	0	0	0	0	0	0	0	0	0	0	0	0	0	0	0	0	0	0	0	0	0	0	0	0
Otu1641	0	0	0	0	0	0	0	0	0	0	0	0	0	0	0	0	0	0	0	0	0	0	0	0	0	0	0	0	0	0	0	0	0	0	0	0	0	2	0	0	0	0	0	0	0	0	0	0	0
Otu1642	0	0	0	0	0	0	0	0	0	0	0	0	0	0	0	0	0	0	0	0	0	0	0	0	0	0	0	0	0	1	0	0	0	0	0	0	0	0	1	0	0	0	0	0	0	0	0	0	0
Otu1643	0	0	0	0	0	0	0	0	0	0	0	0	0	0	0	0	0	0	0	0	0	0	0	0	0	0	0	0	0	0	0	0	0	0	0	0	0	0	0	0	3	0	0	0	0	0	0	0	0
Otu1644	0	0	0	0	0	0	0	0	0	0	0	0	0	0	0	0	0	0	0	0	0	0	0	0	0	0	0	0	0	0	0	0	0	0	0	0	0	0	0	0	0	0	0	0	0	0	0	0	0
Otu1645	0	0	0	0	0	0	0	0	0	0	0	3	0	0	0	0	0	0	0	0	0	0	0	0	0	0	0	0	0	0	0	0	0	0	0	0	0	0	0	0	0	0	0	0	0	0	0	0	0
Otu1646	0	0	0	0	0	0	0	0	0	0	0	0	0	0	0	0	0	0	0	0	0	0	0	0	0	0	0	0	0	0	0	0	0	0	0	0	0	0	0	0	0	0	0	0	0	0	0	0	0
Otu1647	0	0	0	0	0	0	0	0	0	0	0	0	0	0	0	0	0	0	0	0	0	0	0	0	0	0	0	0	0	0	0	0	0	0	0	0	0	0	1	0	0	0	0	2	0	0	0	0	0
Otu1648	0	0	0	0	0	0	0	0	0	0	0	0	0	0	0	0	0	0	0	0	0	0	0	0	0	0	0	0	0	0	0	0	0	0	0	0	0	0	0	0	0	0	0	0	0	0	0	0	0
Otu1649	0	0	0	0	0	0	0	0	0	0	0	0	0	0	0	3	0	0	0	0	0	0	0	0	0	0	0	0	0	0	0	0	0	0	0	0	0	0	0	0	0	0	0	0	0	0	0	0	0
Otu1650	0	0	0	0	0	0	0	0	0	0	0	0	0	0	0	0	0	0	0	0	0	0	0	0	0	0	0	0	0	0	0	3	0	0	0	0	0	0	0	0	0	0	0	0	0	0	0	0	0
Otu1651	0	0	0	0	0	0	0	0	0	3	0	0	0	0	0	0	0	0	0	0	0	0	0	0	0	0	0	0	0	0	0	0	0	0	0	0	0	0	0	0	0	0	0	0	0	0	0	0	0
Otu1652	0	0	0	0	0	0	0	0	0	0	0	0	0	0	0	0	0	0	0	0	0	0	0	0	0	0	0	0	0	0	0	0	0	0	0	0	0	0	0	3	0	0	0	0	0	0	0	0	0
Otu1653	0	0	0	0	0	0	0	0	0	0	0	0	0	0	0	0	0	0	0	0	0	0	0	0	0	0	0	0	0	0	0	0	0	0	0	0	0	0	0	0	0	0	0	0	0	0	3	0	0
Otu1654	0	0	0	0	0	0	0	0	0	0	0	0	0	0	0	0	0	0	3	0	0	0	0	0	0	0	0	0	0	0	0	0	0	0	0	0	0	0	0	0	0	0	0	0	0	0	0	0	0
Otu1655	0	0	0	0	0	0	0	0	0	0	0	0	0	0	0	0	0	0	0	0	0	0	0	0	0	0	0	0	0	0	0	0	0	0	0	0	0	0	0	2	0	0	0	0	0	0	0	0	0
Otu1656	0	0	0	0	0	0	0	0	0	0	0	0	0	0	0	0	0	0	0	0	0	0	0	0	0	0	0	0	0	0	0	0	0	0	0	0	0	0	0	3	0	0	0	0	0	0	0	0	0
Otu1657	0	0	0	0	0	0	0	0	0	0	0	0	3	0	0	0	0	0	0	0	0	0	0	0	0	0	0	0	0	0	0	0	0	0	0	0	0	0	0	0	0	0	0	0	0	0	0	0	0
Otu1658	0	0	0	0	0	0	0	0	0	0	0	0	0	0	0	0	0	0	0	0	0	0	0	0	0	0	0	0	0	0	0	0	0	0	1	0	1	0	1	0	0	0	0	0	0	0	0	0	0
Otu1659	0	0	0	0	0	0	0	0	0	0	0	0	0	0	0	0	0	0	0	0	0	0	0	0	0	0	0	0	0	0	2	0	0	0	0	0	0	0	0	1	0	0	0	0	0	0	0	0	0
Otu1660	0	0	0	0	0	0	0	0	0	0	0	0	0	0	0	0	0	0	0	0	0	0	0	0	0	0	0	0	0	0	0	0	0	0	0	0	1	0	0	0	0	1	0	0	0	0	0	0	0
Otu1661	0	0	0	3	0	0	0	0	0	0	0	0	0	0	0	0	0	0	0	0	0	0	0	0	0	0	0	0	0	0	0	0	0	0	0	0	0	0	0	0	0	0	0	0	0	0	0	0	0
Otu1662	0	0	0	0	0	0	0	0	0	0	0	0	0	0	0	0	0	0	0	0	0	0	0	0	0	0	0	0	0	0	0	0	0	0	1	0	0	0	0	2	0	0	0	0	0	0	0	0	0
Otu1663	0	0	0	0	0	0	0	0	0	0	0	0	0	0	0	0	0	0	0	0	0	0	0	0	0	0	0	0	0	0	0	0	0	0	0	0	0	3	0	0	0	0	0	0	0	0	0	0	0
Otu1664	0	0	0	0	0	0	0	0	0	0	0	0	0	0	0	0	0	0	0	0	0	0	0	0	0	0	0	3	0	0	0	0	0	0	0	0	0	0	0	0	0	0	0	0	0	0	0	0	0
Otu1665	0	0	0	0	0	0	0	0	0	0	0	0	0	0	0	0	0	0	0	0	0	0	0	0	0	0	0	0	0	0	0	0	0	0	0	0	0	0	0	3	0	0	0	0	0	0	0	0	0
Otu1666	0	0	0	0	0	0	0	0	0	0	0	0	0	0	0	0	0	0	0	0	0	0	0	0	0	0	0	0	0	0	0	0	0	0	0	0	0	0	0	0	0	0	0	0	0	0	0	0	0
Otu1667	0	0	0	0	0	0	3	0	0	0	0	0	0	0	0	0	0	0	0	0	0	0	0	0	0	0	0	0	0	0	0	0	0	0	0	0	0	0	0	0	0	0	0	0	0	0	0	0	0
Otu1668	0	0	0	0	0	0	0	0	0	0	0	0	0	0	0	0	0	0	0	0	0	0	0	0	0	0	0	0	0	0	0	3	0	0	0	0	0	0	0	0	0	0	0	0	0	0	0	0	0
Otu1669	0	0	0	0	0	0	0	0	0	0	0	0	0	0	0	0	0	0	0	0	0	0	2	0	0	0	0	1	0	0	0	0	0	0	0	0	0	0	0	0	0	0	0	0	0	0	0	0	0
Otu1670	0	0	0	0	0	0	0	0	0	2	0	0	0	0	0	0	0	0	0	0	0	0	0	0	1	0	0	0	0	0	0	0	0	0	0	0	0	0	0	0	0	0	0	0	0	0	0	0	0
Otu1671	0	0	0	0	0	3	0	0	0	0	0	0	0	0	0	0	0	0	0	0	0	0	0	0	0	0	0	0	0	0	0	0	0	0	0	0	0	0	0	0	0	0	0	0	0	0	0	0	0
Otu1672	0	0	0	0	0	0	0	0	0	0	0	0	0	0	0	0	0	0	0	0	0	0	0	0	0	0	0	0	0	0	0	0	0	0	0	0	0	0	0	0	0	0	0	0	0	0	0	0	0
Otu1673	0	0	0	0	0	0	0	0	0	0	0	0	0	0	0	0	0	0	0	0	0	0	0	0	0	0	0	0	0	0	0	0	0	0	0	0	0	0	0	0	0	0	0	0	0	0	0	0	0
Otu1674	0	0	0	0	0	0	0	0	0	0	0	0	0	0	0	3	0	0	0	0	0	0	0	0	0	0	0	0	0	0	0	0	0	0	0	0	0	0	0	0	0	0	0	0	0	0	0	0	0
Otu1675	0	0	0	0	0	0	0	0	0	0	0	0	0	0	0	0	0	0	0	0	0	0	0	0	0	0	0	0	0	0	0	0	0	0	0	0	0	0	0	0	0	0	0	0	0	0	0	0	0
Otu1676	0	0	0	0	0	0	0	0	0	0	0	0	0	0	0	0	0	0	3	0	0	0	0	0	0	0	0	0	0	0	0	0	0	0	0	0	0	0	0	0	0	0	0	0	0	0	0	0	0
Otu1677	0	0	0	0	0	0	0	0	0	0	0	0	0	0	0	0	0	0	0	0	0	0	0	0	0	0	0	1	0	0	0	2	0	0	0	0	0	0	0	0	0	0	0	0	0	0	0	0	0
Otu1678	0	0	0	0	0	0	0	0	0	0	0	0	0	0	0	0	0	0	0	0	0	0	0	0	0	0	0	0	0	0	0	0	0	0	0	0	0	0	0	0	0	0	0	0	0	0	0	0	0
Otu1679	0	0	0	0	0	0	0	0	0	0	0	0	0	0	0	0	0	0	0	0	0	0	0	1	0	0	0	0	0	0	0	0	0	0	2	0	0	0	0	0	0	0	0	0	0	0	0	0	0
Otu1680	0	0	0	0	0	0	0	0	0	0	0	0	0	0	0	0	0	0	0	0	0	0	0	0	0	0	0	0	0	0	0	0	0	0	0	0	0	0	0	2	0	0	0	0	1	0	0	0	0
Otu1681	0	0	0	3	0	0	0	0	0	0	0	0	0	0	0	0	0	0	0	0	0	0	0	0	0	0	0	0	0	0	0	0	0	0	0	0	0	0	0	0	0	0	0	0	0	0	0	0	0
Otu1682	0	0	0	0	0	0	0	0	0	0	0	0	0	0	0	0	0	0	0	0	0	0	0	0	0	0	0	0	0	0	0	0	0	0	0	0	0	0	0	0	0	0	0	0	0	0	0	0	0
Otu1683	3	0	0	0	0	0	0	0	0	0	0	0	0	0	0	0	0	0	0	0	0	0	0	0	0	0	0	0	0	0	0	0	0	0	0	0	0	0	0	0	0	0	0	0	0	0	0	0	0
Otu1684	0	0	0	0	0	0	0	0	0	0	0	0	0	0	0	0	0	0	0	0	0	0	0	0	0	0	0	0	3	0	0	0	0	0	0	0	0	0	0	0	0	0	0	0	0	0	0	0	0
Otu1685	0	0	0	0	0	0	0	0	0	0	0	0	0	0	0	0	0	0	0	0	0	0	0	0	0	0	0	0	0	0	0	0	0	0	0	0	0	0	0	0	0	0	0	0	0	0	0	0	0
Otu1686	0	0	0	0	0	0	0	0	0	0	0	0	0	0	0	0	0	0	0	0	0	0	0	0	0	0	0	0	0	0	0	0	0	0	0	0	0	0	0	0	0	0	0	0	0	0	0	0	0
Otu1687	0	0	0	0	0	0	0	0	0	0	0	0	0	0	0	0	0	0	0	0	0	1	0	0	0	0	0	0	0	0	1	0	0	0	0	0	0	0	0	0	0	0	0	0	0	0	0	0	0
Otu1688	0	0	0	0	0	0	3	0	0	0	0	0	0	0	0	0	0	0	0	0	0	0	0	0	0	0	0	0	0	0	0	0	0	0	0	0	0	0	0	0	0	0	0	0	0	0	0	0	0
Otu1689	0	0	0	0	0	0	0	0	0	0	0	0	0	0	0	0	0	0	0	0	0	0	0	0	0	0	0	0	0	0	0	0	0	3	0	0	0	0	0	0	0	0	0	0	0	0	0	0	0
Otu1690	0	0	0	0	0	0	0	0	0	0	0	0	0	0	0	0	0	0	0	0	0	0	0	0	0	0	0	0	0	0	0	0	0	0	0	0	0	0	0	0	0	0	0	0	0	0	0	0	0
Otu1691	0	0	0	0	0	0	0	0	0	0	0	0	0	0	0	0	0	0	0	0	0	0	0	0	0	0	0	0	0	0	0	0	0	0	0	1	0	0	0	0	0	0	0	0	0	0	0	0	0
Otu1692	0	0	0	0	0	0	0	0	0	0	0	0	0	0	0	0	0	0	0	0	0	0	0	0	0	0	0	0	0	0	0	3	0	0	0	0	0	0	0	0	0	0	0	0	0	0	0	0	0
Otu1693	0	0	0	0	0	0	0	0	0	0	0	0	0	0	0	0	0	0	0	0	0	0	0	0	0	0	2	0	0	0	0	0	0	0	0	0	0	0	0	0	1	0	0	0	0	0	0	0	0
Otu1694	0	0	0	0	0	0	0	0	0	0	0	0	0	0	0	0	0	0	0	0	0	0	0	0	2	0	0	0	0	0	0	0	0	0	0	0	0	0	1	0	0	0	0	0	0	0	0	0	0
Otu1695	0	0	0	0	0	0	0	0	0	0	0	0	0	0	0	0	0	0	0	0	0	0	0	0	0	0	0	0	0	0	0	3	0	0	0	0	0	0	0	0	0	0	0	0	0	0	0	0	0
Otu1696	0	0	0	0	0	0	0	0	0	0	0	0	0	0	0	0	0	0	0	0	0	0	0	0	0	0	0	0	0	0	0	0	0	0	0	0	0	0	0	0	0	0	0	0	0	0	0	0	0
Otu1697	0	0	0	0	0	0	0	0	0	0	0	0	0	0	0	0	0	0	0	0	0	2	1	0	0	0	0	0	0	0	0	0	0	0	0	0	0	0	0	0	0	0	0	0	0	0	0	0	0
Otu1698	0	0	0	0	0	0	0	0	0	3	0	0	0	0	0	0	0	0	0	0	0	0	0	0	0	0	0	0	0	0	0	0	0	0	0	0	0	0	0	0	0	0	0	0	0	0	0	0	0
Otu1699	0	0	0	0	0	0	0	0	0	0	0	0	0	0	1	0	0	0	0	0	2	0	0	0	0	0	0	0	0	0	0	0	0	0	0	0	0	0	0	0	0	0	0	0	0	0	0	0	0
Otu1700	0	0	0	0	0	0	0	0	0	0	0	0	0	0	0	0	0	0	0	0	0	0	0	0	0	0	0	0	0	0	0	0	0	0	0	0	0	0	0	0	0	0	0	0	0	0	0	0	0
Otu1701	0	0	0	0	0	0	0	0	0	0	0	0	0	0	0	0	0	0	0	0	0	0	0	0	0	0	0	0	0	0	0	0	0	0	0	0	0	0	3	0	0	0	0	0	0	0	0	0	0
Otu1702	3	0	0	0	0	0	0	0	0	0	0	0	0	0	0	0	0	0	0	0	0	0	0	0	0	0	0	0	0	0	0	0	0	0	0	0	0	0	0	0	0	0	0	0	0	0	0	0	0
Otu1703	0	0	0	0	0	0	0	0	0	0	0	0	0	0	0	0	0	0	0	0	0	0	0	0	0	0	0	0	0	0	0	0	0	0	1	1	0	0	1	0	0	0	0	0	0	0	0	0	0
Otu1704	0	0	0	0	0	0	0	0	0	0	0	0	0	0	0	0	0	0	0	0	0	0	0	0	0	0	0	0	3	0	0	0	0	0	0	0	0	0	0	0	0	0	0	0	0	0	0	0	0
Otu1705	0	0	0	0	0	0	0	0	0	0	0	0	0	0	0	0	0	0	0	0	0	1	0	0	0	0	2	0	0	0	0	0	0	0	0	0	0	0	0	0	0	0	0	0	0	0	0	0	0
Otu1706	0	0	0	0	0	0	0	0	0	0	0	0	0	0	0	0	0	0	0	0	0	0	0	0	0	0	0	0	0	0	0	0	0	0	0	0	0	0	0	0	0	0	0	0	3	0	0	0	0
Otu1707	0	0	0	0	0	0	0	0	0	0	0	0	0	0	3	0	0	0	0	0	0	0	0	0	0	0	0	0	0	0	0	0	0	0	0	0	0	0	0	0	0	0	0	0	0	0	0	0	0
Otu1708	0	0	0	0	0	0	0	0	0	0	0	0	0	0	0	0	0	0	0	0	0	0	0	0	0	0	0	0	0	0	0	0	0	0	0	0	0	3	0	0	0	0	0	0	0	0	0	0	0
Otu1709	0	0	0	0	0	0	0	0	0	0	0	0	0	0	0	0	0	0	0	0	0	0	0	0	0	0	0	0	0	0	0	0	0	0	0	0	0	0	0	0	0	0	0	0	0	0	1	0	0
Otu1710	0	0	0	0	0	0	0	0	0	0	0	0	0	0	0	0	0	0	0	0	0	0	0	0	0	0	0	0	0	0	0	0	0	0	0	0	0	0	0	0	0	0	0	0	0	0	0	0	0
Otu1711	0	0	0	0	0	0	0	0	0	0	0	0	0	0	0	0	0	0	0	3	0	0	0	0	0	0	0	0	0	0	0	0	0	0	0	0	0	0	0	0	0	0	0	0	0	0	0	0	0
Otu1712	0	0	0	0	0	0	3	0	0	0	0	0	0	0	0	0	0	0	0	0	0	0	0	0	0	0	0	0	0	0	0	0	0	0	0	0	0	0	0	0	0	0	0	0	0	0	0	0	0
Otu1713	0	0	0	0	0	0	0	0	0	0	0	0	0	0	0	0	0	0	0	0	0	0	0	0	0	0	0	0	0	0	0	0	0	0	0	0	0	0	0	2	0	0	0	0	0	0	0	0	0
Otu1714	0	0	0	0	0	0	0	0	0	0	0	0	0	0	0	0	0	0	0	0	0	0	0	0	0	0	0	0	0	0	0	0	0	0	0	0	0	0	0	0	0	0	0	0	0	0	0	0	0
Otu1715	0	0	0	0	0	0	0	0	0	0	0	0	0	0	0	0	0	0	0	0	0	0	0	0	0	1	0	0	0	0	0	0	0	0	0	0	0	0	0	0	0	0	0	0	0	0	0	0	0
Otu1716	0	0	0	0	0	0	0	0	0	0	0	0	0	0	0	0	0	0	0	0	0	0	0	0	0	0	0	0	0	0	0	0	0	0	0	0	0	0	0	0	0	0	0	0	0	0	0	0	0
Otu1717	0	0	0	0	0	0	0	0	0	0	0	0	0	0	0	0	0	0	0	0	0	0	0	0	0	0	0	0	0	0	0	0	0	0	0	0	0	0	0	0	0	0	0	0	0	0	0	0	0
Otu1718	0	0	0	0	0	3	0	0	0	0	0	0	0	0	0	0	0	0	0	0	0	0	0	0	0	0	0	0	0	0	0	0	0	0	0	0	0	0	0	0	0	0	0	0	0	0	0	0	0
Otu1719	0	0	0	0	0	0	0	0	0	0	0	0	0	0	0	0	0	0	0	0	0	0	0	3	0	0	0	0	0	0	0	0	0	0	0	0	0	0	0	0	0	0	0	0	0	0	0	0	0
Otu1720	0	0	0	0	0	0	0	0	0	0	0	0	0	0	0	0	0	0	0	0	0	0	0	0	0	0	0	0	0	0	0	0	0	0	0	0	0	0	0	0	0	0	0	0	0	0	3	0	0
Otu1721	0	0	0	0	0	0	0	0	0	0	0	0	0	0	0	3	0	0	0	0	0	0	0	0	0	0	0	0	0	0	0	0	0	0	0	0	0	0	0	0	0	0	0	0	0	0	0	0	0
Otu1722	0	0	0	0	0	0	0	0	0	0	0	0	0	0	0	0	0	0	0	0	0	0	0	0	0	0	0	0	0	0	0	0	0	0	0	0	0	0	0	0	0	0	0	0	0	0	0	0	0
Otu1723	0	0	0	0	0	0	0	0	0	0	0	0	0	0	0	0	0	0	0	3	0	0	0	0	0	0	0	0	0	0	0	0	0	0	0	0	0	0	0	0	0	0	0	0	0	0	0	0	0
Otu1724	0	0	0	0	0	0	0	0	0	0	0	0	0	0	0	0	0	0	0	0	0	0	0	0	0	0	0	0	0	0	0	0	0	0	0	0	0	0	0	0	0	0	0	0	0	0	0	0	0
Otu1725	0	0	0	0	0	0	0	0	0	0	0	0	0	0	0	0	0	0	0	0	0	0	0	0	0	0	0	0	0	0	0	0	0	0	0	0	0	0	0	3	0	0	0	0	0	0	0	0	0
Otu1726	0	0	0	0	0	0	0	0	0	0	0	0	0	0	0	0	0	0	0	0	0	0	0	0	0	0	0	0	0	0	0	0	0	0	0	0	0	0	0	0	0	0	0	0	0	0	0	0	0
Otu1727	0	0	0	0	0	0	0	0	0	0	0	0	0	0	0	0	0	0	0	0	0	0	0	0	0	0	0	0	0	0	0	0	0	0	0	0	0	0	0	0	0	0	0	0	3	0	0	0	0
Otu1728	0	0	0	0	0	0	0	0	0	0	0	0	0	0	0	0	0	0	0	0	0	0	0	0	0	0	0	0	0	0	0	0	0	0	0	0	0	0	0	3	0	0	0	0	0	0	0	0	0
Otu1729	0	0	0	0	0	0	0	0	0	0	0	0	0	0	0	0	0	0	0	0	0	0	0	0	0	0	0	0	0	0	0	0	0	0	0	0	0	0	0	0	0	0	0	0	0	0	0	0	0
Otu1730	0	0	0	0	0	0	0	0	0	0	3	0	0	0	0	0	0	0	0	0	0	0	0	0	0	0	0	0	0	0	0	0	0	0	0	0	0	0	0	0	0	0	0	0	0	0	0	0	0
Otu1731	0	0	0	0	0	0	0	0	0	0	0	0	0	0	0	0	0	0	0	0	0	0	0	0	0	0	0	1	0	0	0	0	0	0	0	0	2	0	0	0	0	0	0	0	0	0	0	0	0
Otu1732	0	0	1	0	0	0	0	0	0	0	0	0	0	0	0	0	0	0	0	0	0	2	0	0	0	0	0	0	0	0	0	0	0	0	0	0	0	0	0	0	0	0	0	0	0	0	0	0	0
Otu1733	0	0	0	0	0	0	0	0	0	0	3	0	0	0	0	0	0	0	0	0	0	0	0	0	0	0	0	0	0	0	0	0	0	0	0	0	0	0	0	0	0	0	0	0	0	0	0	0	0
Otu1734	0	0	0	0	0	0	0	0	0	0	0	0	0	0	0	0	0	0	0	0	0	0	0	0	0	0	0	0	0	0	0	0	0	0	0	0	0	0	0	0	0	0	0	0	0	0	0	0	0
Otu1735	0	0	0	0	0	0	0	0	0	0	0	0	0	0	0	0	0	0	0	0	0	0	0	0	0	0	0	0	0	0	0	0	0	0	0	0	0	0	0	2	0	0	0	0	0	0	0	0	0
Otu1736	0	0	0	0	0	0	0	0	0	0	0	0	0	0	0	0	0	0	0	0	0	0	0	0	0	0	0	0	0	0	0	0	0	0	0	0	0	0	0	0	0	0	0	1	0	0	0	0	0
Otu1737	0	0	0	0	0	0	0	0	0	0	0	0	0	0	0	0	0	0	0	0	0	0	0	1	1	0	0	0	0	0	0	0	0	0	0	0	0	0	0	0	0	0	0	0	0	0	0	0	0
Otu1738	0	0	0	0	0	0	0	0	0	0	0	0	0	0	0	0	0	0	0	0	0	0	0	0	0	0	0	0	0	0	0	0	0	0	0	0	0	0	0	0	0	0	0	0	0	0	0	0	0
Otu1739	0	0	0	0	0	0	2	0	0	0	0	0	0	0	0	0	0	0	0	0	0	0	0	0	0	0	0	0	0	0	0	0	0	0	0	0	0	0	0	0	0	0	0	0	0	0	0	0	0
Otu1740	0	0	0	0	0	0	0	0	0	0	0	0	0	0	0	0	0	0	0	0	0	0	0	0	0	0	0	0	0	0	0	0	0	0	0	0	0	0	0	0	0	2	0	0	0	0	0	0	0
Otu1741	0	0	0	0	0	0	0	0	0	0	0	0	0	0	0	0	0	0	0	0	0	0	0	0	0	0	0	0	0	0	0	0	0	0	0	0	0	0	0	0	0	0	0	0	0	0	0	0	0
Otu1742	0	0	0	0	0	0	0	0	0	0	0	0	0	0	0	0	0	0	0	0	0	0	0	0	0	0	0	0	0	0	0	0	0	0	0	0	0	0	0	0	0	0	0	0	0	0	0	0	0
Otu1743	0	0	0	0	0	0	0	0	0	0	0	0	0	0	0	0	0	0	0	0	0	0	0	0	0	0	0	0	0	0	0	0	0	0	0	0	0	0	0	0	0	0	0	0	0	0	0	0	0
Otu1744	0	0	0	0	0	0	0	0	0	0	0	0	0	0	0	0	0	0	0	0	0	0	0	0	0	0	0	0	0	0	0	0	0	0	0	0	0	0	0	0	0	2	0	0	0	0	0	0	0
Otu1745	0	0	0	0	0	0	0	2	0	0	0	0	0	0	0	0	0	0	0	0	0	0	0	0	0	0	0	0	0	0	0	0	0	0	0	0	0	0	0	0	0	0	0	0	0	0	0	0	0
Otu1746	2	0	0	0	0	0	0	0	0	0	0	0	0	0	0	0	0	0	0	0	0	0	0	0	0	0	0	0	0	0	0	0	0	0	0	0	0	0	0	0	0	0	0	0	0	0	0	0	0
Otu1747	0	0	0	0	0	0	0	0	0	0	0	0	0	0	0	0	0	0	0	0	0	0	1	0	0	0	0	0	1	0	0	0	0	0	0	0	0	0	0	0	0	0	0	0	0	0	0	0	0
Otu1748	0	0	0	0	0	0	0	0	0	0	0	0	0	0	0	0	0	0	0	0	0	0	0	0	0	0	0	0	0	0	0	0	0	0	0	0	0	0	0	0	0	0	0	0	0	0	0	0	0
Otu1749	0	0	0	0	0	0	0	0	0	0	0	0	0	0	0	0	0	0	0	0	0	0	0	0	0	0	0	2	0	0	0	0	0	0	0	0	0	0	0	0	0	0	0	0	0	0	0	0	0
Otu1750	0	0	0	0	0	0	0	0	0	0	0	0	0	0	0	0	0	0	0	0	0	0	0	0	0	0	0	0	0	0	0	0	0	0	0	0	0	0	0	0	0	0	0	0	0	0	0	0	0
Otu1751	0	2	0	0	0	0	0	0	0	0	0	0	0	0	0	0	0	0	0	0	0	0	0	0	0	0	0	0	0	0	0	0	0	0	0	0	0	0	0	0	0	0	0	0	0	0	0	0	0
Otu1752	0	0	0	0	0	0	0	0	0	0	0	0	0	0	0	0	0	0	0	0	0	0	0	0	0	0	0	0	0	0	0	0	0	0	1	0	0	0	0	0	0	0	0	0	0	0	0	0	0
Otu1753	0	0	0	0	0	2	0	0	0	0	0	0	0	0	0	0	0	0	0	0	0	0	0	0	0	0	0	0	0	0	0	0	0	0	0	0	0	0	0	0	0	0	0	0	0	0	0	0	0
Otu1754	0	0	0	0	0	0	0	0	0	0	0	0	0	0	0	0	0	0	0	0	0	0	0	0	0	0	0	0	0	0	0	0	0	0	0	0	0	0	0	0	0	0	0	0	0	0	0	0	0
Otu1755	0	0	0	0	0	0	0	0	0	0	0	0	0	0	0	0	0	0	0	0	0	1	0	0	0	0	0	0	0	0	0	0	0	0	0	0	0	0	0	0	0	0	0	0	0	0	0	0	0
Otu1756	0	0	0	0	0	0	0	0	0	0	0	0	0	0	0	0	0	0	0	0	0	0	0	0	0	0	0	0	0	0	0	0	0	0	0	0	0	0	0	0	0	0	0	0	0	0	0	0	0
Otu1757	0	0	0	0	0	0	0	0	0	0	0	0	0	0	0	0	0	0	0	0	0	0	0	0	0	0	0	0	0	0	0	0	0	0	0	0	0	0	0	2	0	0	0	0	0	0	0	0	0
Otu1758	0	0	0	0	0	0	0	0	0	0	0	0	0	0	0	0	0	0	0	0	0	0	0	0	0	0	0	2	0	0	0	0	0	0	0	0	0	0	0	0	0	0	0	0	0	0	0	0	0
Otu1759	0	0	0	0	0	0	0	0	0	0	0	0	0	0	0	0	0	0	0	0	0	0	0	0	0	0	0	0	0	0	0	0	0	0	0	0	0	0	0	0	0	0	0	0	0	0	0	0	0
Otu1760	0	0	0	0	0	0	0	0	0	0	0	0	0	0	0	0	0	0	0	0	0	0	0	0	0	0	0	0	0	0	0	0	0	0	0	0	0	0	0	0	0	0	0	0	0	0	0	0	0
Otu1761	0	0	0	0	0	0	0	0	0	0	0	0	0	0	0	0	0	0	0	0	0	0	0	0	0	0	0	0	0	0	0	0	0	0	0	0	0	0	0	0	0	0	0	0	0	0	0	0	0
Otu1762	0	0	0	0	0	0	0	0	0	0	0	0	0	0	0	0	0	0	0	0	0	0	0	0	0	0	0	0	0	0	0	0	0	0	0	0	0	0	0	0	0	0	0	0	0	0	0	0	0
Otu1763	0	0	0	0	0	0	0	0	0	0	0	0	0	0	0	0	0	0	0	0	0	0	0	0	0	0	1	0	0	0	0	0	0	0	0	0	0	0	0	0	0	0	0	0	0	0	0	0	0
Otu1764	0	0	0	0	0	0	0	0	0	0	0	0	0	0	0	0	0	0	0	0	0	0	0	0	0	0	0	0	0	0	0	0	0	0	0	0	0	0	0	0	0	0	0	0	0	0	0	0	0
Otu1765	0	0	0	0	0	0	0	0	0	0	0	0	0	0	0	0	0	0	0	0	0	0	0	0	0	0	0	0	0	0	0	0	0	0	0	0	0	0	0	0	0	0	0	2	0	0	0	0	0
Otu1766	0	0	0	0	0	0	0	0	0	0	0	0	0	0	0	0	0	0	0	0	0	0	0	0	0	1	1	0	0	0	0	0	0	0	0	0	0	0	0	0	0	0	0	0	0	0	0	0	0
Otu1767	0	0	0	0	0	0	0	0	0	0	0	0	0	0	0	0	0	0	0	0	0	0	0	0	0	0	0	0	0	1	0	0	0	0	0	0	0	0	0	0	1	0	0	0	0	0	0	0	0
Otu1768	0	0	0	0	0	0	0	0	0	0	0	0	0	0	0	0	0	0	0	0	0	0	0	0	0	0	0	0	0	0	0	0	0	0	0	0	0	0	0	0	0	0	0	1	0	0	0	0	0
Otu1769	0	0	0	0	0	0	0	0	0	0	0	0	0	0	0	0	0	0	0	0	0	0	0	0	0	0	0	0	0	0	0	0	0	0	0	0	0	0	0	2	0	0	0	0	0	0	0	0	0
Otu1770	0	0	0	0	0	0	0	0	0	0	0	0	0	0	0	0	0	0	0	0	0	0	0	0	0	0	0	0	0	0	0	0	0	0	0	0	0	0	0	0	0	0	0	0	0	0	0	0	0
Otu1771	0	0	0	0	0	0	0	0	0	0	0	0	0	0	0	0	0	0	0	0	0	0	0	0	0	0	0	0	0	0	0	0	0	0	0	2	0	0	0	0	0	0	0	0	0	0	0	0	0
Otu1772	0	0	0	0	0	0	0	0	0	0	0	0	0	0	0	0	0	0	0	0	0	0	0	0	0	0	0	0	0	0	0	0	0	0	0	0	0	0	0	0	0	0	0	0	0	0	0	0	0
Otu1773	0	0	0	0	0	2	0	0	0	0	0	0	0	0	0	0	0	0	0	0	0	0	0	0	0	0	0	0	0	0	0	0	0	0	0	0	0	0	0	0	0	0	0	0	0	0	0	0	0
Otu1774	0	0	0	0	0	0	0	0	0	0	0	0	0	0	0	0	0	0	1	0	0	0	0	0	0	0	0	0	0	0	0	0	0	0	0	0	0	0	0	0	0	0	0	0	1	0	0	0	0
Otu1775	0	0	0	0	0	0	0	0	0	0	0	0	0	0	0	0	0	0	0	0	0	0	0	0	0	0	0	0	0	0	0	0	0	0	0	0	0	0	0	0	0	0	0	0	0	0	2	0	0
Otu1776	0	0	0	0	0	0	0	0	0	0	0	0	0	0	0	0	0	0	0	0	0	0	2	0	0	0	0	0	0	0	0	0	0	0	0	0	0	0	0	0	0	0	0	0	0	0	0	0	0
Otu1777	0	0	0	0	0	0	0	0	0	0	0	0	0	0	0	0	0	0	0	0	0	0	0	0	0	0	0	1	0	0	0	0	0	0	0	0	0	0	0	0	0	0	0	0	0	0	0	0	0
Otu1778	0	0	0	0	0	0	0	0	0	0	0	0	0	0	0	0	0	0	0	0	0	0	0	0	0	0	0	0	0	0	0	0	0	0	1	0	0	0	1	0	0	0	0	0	0	0	0	0	0
Otu1779	0	0	0	0	0	0	0	0	0	0	0	0	0	0	0	0	0	0	0	0	0	0	0	0	0	0	0	0	0	0	0	0	0	0	0	0	0	0	0	0	0	0	0	0	0	0	0	0	0
Otu1780	0	0	0	0	0	0	0	0	0	0	0	0	0	0	0	2	0	0	0	0	0	0	0	0	0	0	0	0	0	0	0	0	0	0	0	0	0	0	0	0	0	0	0	0	0	0	0	0	0
Otu1781	0	0	0	0	0	0	0	0	0	0	0	0	0	0	0	0	0	0	0	0	0	0	0	0	0	0	0	0	0	0	0	0	0	0	0	0	0	0	0	0	0	0	0	0	0	0	0	0	0
Otu1782	0	0	0	0	0	0	0	0	0	0	0	0	0	0	0	0	0	0	0	0	0	0	0	0	0	0	0	0	0	0	0	0	0	0	0	0	0	0	0	0	0	0	0	0	0	0	0	0	0
Otu1783	0	0	0	0	0	0	0	0	0	0	0	0	0	0	0	0	0	0	0	0	0	0	0	0	0	0	0	0	0	0	0	2	0	0	0	0	0	0	0	0	0	0	0	0	0	0	0	0	0
Otu1784	0	0	0	0	0	0	0	0	0	2	0	0	0	0	0	0	0	0	0	0	0	0	0	0	0	0	0	0	0	0	0	0	0	0	0	0	0	0	0	0	0	0	0	0	0	0	0	0	0
Otu1785	0	0	0	0	0	0	0	0	0	0	0	0	0	0	0	0	0	0	0	0	0	0	0	0	0	0	0	0	0	0	0	0	0	0	0	0	0	0	0	0	0	0	0	0	0	0	2	0	0
Otu1786	0	0	0	0	0	0	0	0	0	0	0	0	0	0	0	0	0	0	0	0	0	0	0	0	0	0	0	0	0	0	0	0	0	0	0	0	0	0	0	0	2	0	0	0	0	0	0	0	0
Otu1787	0	0	0	0	0	0	0	0	0	0	0	0	0	0	0	0	0	0	0	0	0	0	0	0	0	0	0	0	0	0	0	0	0	0	0	0	0	0	0	0	0	0	0	0	0	0	0	0	0
Otu1788	0	0	0	0	0	0	0	0	0	0	0	0	0	0	0	0	0	0	0	0	0	0	0	0	0	0	0	0	0	0	1	0	0	0	0	0	0	0	0	0	0	0	0	0	0	0	0	0	0
Otu1789	0	0	0	0	0	0	0	0	0	0	0	0	0	0	0	0	0	0	0	0	0	0	0	0	0	0	0	0	0	0	0	0	0	0	0	0	0	0	0	2	0	0	0	0	0	0	0	0	0
Otu1790	0	0	0	0	0	0	0	0	0	0	0	0	0	0	0	0	0	0	0	0	0	0	0	0	0	0	0	0	0	0	0	0	0	0	0	0	0	0	0	0	0	0	0	0	2	0	0	0	0
Otu1791	0	0	0	0	0	0	0	0	0	0	0	0	0	0	0	0	0	0	0	0	0	0	0	0	0	0	0	0	0	0	0	0	0	0	0	0	0	0	0	0	0	0	0	0	0	0	0	0	0
Otu1792	0	0	0	0	0	0	0	0	0	0	0	0	0	0	0	0	0	0	0	0	0	0	0	0	0	0	0	2	0	0	0	0	0	0	0	0	0	0	0	0	0	0	0	0	0	0	0	0	0
Otu1793	0	0	0	0	0	0	0	0	0	0	0	0	0	0	0	0	0	0	2	0	0	0	0	0	0	0	0	0	0	0	0	0	0	0	0	0	0	0	0	0	0	0	0	0	0	0	0	0	0
Otu1794	0	0	0	0	0	0	0	0	0	0	0	0	0	0	0	0	0	0	0	0	0	0	0	0	0	0	0	0	0	0	0	0	0	0	0	2	0	0	0	0	0	0	0	0	0	0	0	0	0
Otu1795	0	0	0	0	0	0	0	0	0	0	0	0	0	0	0	0	0	0	0	0	0	0	0	0	0	0	0	0	0	0	0	0	0	0	0	0	0	0	0	0	0	0	0	0	0	0	0	0	0
Otu1796	0	0	0	0	0	0	0	0	0	0	0	0	0	0	0	0	2	0	0	0	0	0	0	0	0	0	0	0	0	0	0	0	0	0	0	0	0	0	0	0	0	0	0	0	0	0	0	0	0
Otu1797	0	0	0	0	0	0	0	0	0	0	0	0	0	0	0	0	0	0	0	0	0	0	0	0	0	0	0	0	0	0	2	0	0	0	0	0	0	0	0	0	0	0	0	0	0	0	0	0	0
Otu1798	0	0	0	0	0	0	0	0	0	0	0	0	0	0	0	0	0	0	0	0	0	0	2	0	0	0	0	0	0	0	0	0	0	0	0	0	0	0	0	0	0	0	0	0	0	0	0	0	0
Otu1799	0	0	0	0	0	0	0	0	0	0	0	0	0	0	0	0	0	0	0	0	0	0	0	0	0	2	0	0	0	0	0	0	0	0	0	0	0	0	0	0	0	0	0	0	0	0	0	0	0
Otu1800	0	0	0	0	0	0	0	0	0	0	0	0	0	0	0	0	0	0	0	0	0	0	0	0	0	0	0	0	0	0	0	0	0	2	0	0	0	0	0	0	0	0	0	0	0	0	0	0	0
Otu1801	0	0	0	0	0	0	0	0	0	0	0	0	0	0	0	0	0	0	0	0	0	0	0	1	0	0	0	0	0	0	0	0	0	0	0	0	0	0	0	0	0	0	0	0	0	0	0	0	0
Otu1802	0	0	0	0	0	0	0	0	0	0	0	0	0	0	0	0	0	0	0	0	0	0	0	0	0	0	0	0	0	0	0	0	0	0	0	0	0	0	0	0	0	0	0	0	0	0	0	0	0
Otu1803	0	0	0	0	0	0	0	0	0	0	0	0	0	0	0	0	0	0	0	0	0	0	0	0	0	1	0	0	0	0	0	0	0	0	0	1	0	0	0	0	0	0	0	0	0	0	0	0	0
Otu1804	0	0	0	0	0	0	0	0	0	0	0	0	0	0	0	0	0	0	0	0	0	0	0	0	0	0	0	0	0	0	0	2	0	0	0	0	0	0	0	0	0	0	0	0	0	0	0	0	0
Otu1805	0	0	0	0	0	0	0	0	0	0	0	0	0	0	0	0	0	0	0	0	0	0	0	0	0	0	0	0	0	0	0	0	0	0	0	0	0	0	0	0	0	0	0	0	0	0	0	0	0
Otu1806	0	0	0	0	0	0	0	0	0	0	0	0	0	0	0	0	0	0	0	0	0	0	0	0	0	0	0	0	0	0	0	0	0	0	0	0	0	2	0	0	0	0	0	0	0	0	0	0	0
Otu1807	0	0	0	0	0	0	0	0	0	0	0	0	0	0	0	0	0	0	0	0	0	0	0	0	0	0	0	0	0	0	0	0	0	0	0	0	0	0	0	0	0	0	0	0	0	0	0	2	0
Otu1808	0	0	0	0	0	0	2	0	0	0	0	0	0	0	0	0	0	0	0	0	0	0	0	0	0	0	0	0	0	0	0	0	0	0	0	0	0	0	0	0	0	0	0	0	0	0	0	0	0
Otu1809	0	0	0	0	0	0	0	0	0	0	0	0	0	0	0	0	0	0	0	0	0	0	1	0	0	0	0	0	0	0	0	0	0	1	0	0	0	0	0	0	0	0	0	0	0	0	0	0	0
Otu1810	0	0	0	0	0	0	0	0	0	0	0	0	0	0	0	0	0	0	0	0	0	0	0	0	0	0	0	0	0	0	0	0	0	0	0	0	0	2	0	0	0	0	0	0	0	0	0	0	0
Otu1811	0	0	0	0	0	0	0	0	0	0	0	0	0	0	0	0	0	0	0	0	0	0	0	0	2	0	0	0	0	0	0	0	0	0	0	0	0	0	0	0	0	0	0	0	0	0	0	0	0
Otu1812	0	0	0	0	0	0	0	0	0	0	0	0	0	0	0	0	0	0	0	0	0	0	0	0	0	0	0	0	0	0	0	0	0	0	0	0	0	0	0	0	2	0	0	0	0	0	0	0	0
Otu1813	0	0	0	0	0	0	0	0	0	0	0	0	0	0	0	0	0	0	0	0	0	0	0	0	0	0	0	0	0	0	0	2	0	0	0	0	0	0	0	0	0	0	0	0	0	0	0	0	0
Otu1814	0	0	0	0	0	0	0	0	0	0	0	0	0	0	0	0	0	0	0	0	0	0	0	0	0	0	0	0	0	0	0	0	0	0	0	0	0	0	0	0	0	0	0	0	0	0	0	0	0
Otu1815	0	0	0	0	0	0	0	0	0	0	0	0	0	0	0	0	0	0	0	0	0	0	0	0	0	0	0	0	0	0	0	0	0	0	0	0	0	0	0	0	0	0	0	0	0	0	0	0	0
Otu1816	0	0	0	0	0	0	0	0	0	0	0	0	0	0	0	0	0	0	0	0	0	0	0	0	0	0	0	2	0	0	0	0	0	0	0	0	0	0	0	0	0	0	0	0	0	0	0	0	0
Otu1817	0	0	0	0	0	0	2	0	0	0	0	0	0	0	0	0	0	0	0	0	0	0	0	0	0	0	0	0	0	0	0	0	0	0	0	0	0	0	0	0	0	0	0	0	0	0	0	0	0
Otu1818	0	0	0	0	0	0	0	0	0	0	0	0	0	0	0	0	0	0	0	0	0	0	0	0	0	0	0	0	0	0	0	0	0	0	0	0	0	0	0	0	0	0	0	0	0	0	0	0	0
Otu1819	0	0	0	0	0	0	0	0	0	0	0	0	0	0	0	0	0	0	0	0	0	0	0	0	0	0	0	0	0	0	0	1	1	0	0	0	0	0	0	0	0	0	0	0	0	0	0	0	0
Otu1820	0	0	0	0	0	0	0	0	0	0	0	0	0	0	0	0	0	0	0	0	0	0	0	0	0	0	0	0	0	0	0	0	0	0	0	0	0	0	0	0	0	0	0	0	0	0	0	0	0
Otu1821	0	0	0	0	0	0	0	0	0	0	0	0	0	0	0	0	0	0	0	0	0	0	0	0	1	0	0	0	0	0	0	0	0	0	0	0	0	0	0	0	0	0	0	0	0	0	0	0	0
Otu1822	0	0	0	0	0	0	0	0	0	0	0	0	0	0	0	0	0	0	0	0	0	1	0	0	0	0	0	0	0	0	0	0	0	0	0	0	0	0	0	1	0	0	0	0	0	0	0	0	0
Otu1823	0	0	0	0	0	0	0	0	0	0	0	0	0	0	0	0	0	0	0	0	0	0	0	0	0	0	0	0	0	0	0	0	0	0	0	0	0	0	0	0	0	0	0	0	0	0	0	0	0
Otu1824	0	0	0	0	0	0	0	0	0	0	0	0	0	0	0	0	0	0	0	0	0	0	0	0	0	0	0	0	0	0	0	0	0	0	0	0	0	0	0	0	0	0	0	0	0	0	0	0	0
Otu1825	0	0	0	0	0	0	0	0	0	0	0	0	2	0	0	0	0	0	0	0	0	0	0	0	0	0	0	0	0	0	0	0	0	0	0	0	0	0	0	0	0	0	0	0	0	0	0	0	0
Otu1826	0	0	0	0	0	0	2	0	0	0	0	0	0	0	0	0	0	0	0	0	0	0	0	0	0	0	0	0	0	0	0	0	0	0	0	0	0	0	0	0	0	0	0	0	0	0	0	0	0
Otu1827	0	0	0	0	0	0	0	0	0	0	0	0	0	0	2	0	0	0	0	0	0	0	0	0	0	0	0	0	0	0	0	0	0	0	0	0	0	0	0	0	0	0	0	0	0	0	0	0	0
Otu1828	1	0	0	0	0	0	0	0	0	0	0	0	0	0	0	1	0	0	0	0	0	0	0	0	0	0	0	0	0	0	0	0	0	0	0	0	0	0	0	0	0	0	0	0	0	0	0	0	0
Otu1829	0	0	0	0	0	0	0	0	0	0	0	0	0	0	0	0	0	0	0	0	0	0	0	0	0	0	0	0	0	0	0	2	0	0	0	0	0	0	0	0	0	0	0	0	0	0	0	0	0
Otu1830	0	0	0	0	0	0	0	0	0	0	0	0	0	0	0	0	0	0	0	0	0	0	0	2	0	0	0	0	0	0	0	0	0	0	0	0	0	0	0	0	0	0	0	0	0	0	0	0	0
Otu1831	0	0	0	0	0	0	0	0	0	0	0	0	0	0	0	0	0	0	0	0	0	0	0	0	0	0	0	0	0	0	0	0	0	0	0	0	0	0	0	0	0	0	0	0	0	0	0	0	0
Otu1832	0	0	0	0	0	0	2	0	0	0	0	0	0	0	0	0	0	0	0	0	0	0	0	0	0	0	0	0	0	0	0	0	0	0	0	0	0	0	0	0	0	0	0	0	0	0	0	0	0
Otu1833	0	0	0	0	0	0	0	0	0	0	0	0	0	0	0	0	0	0	0	0	0	2	0	0	0	0	0	0	0	0	0	0	0	0	0	0	0	0	0	0	0	0	0	0	0	0	0	0	0
Otu1834	0	0	0	0	0	0	0	0	0	0	0	0	0	0	0	0	0	0	0	0	0	0	0	0	0	0	0	0	0	0	0	0	0	0	0	0	0	0	0	0	0	0	0	0	0	0	0	0	0
Otu1835	0	0	0	0	0	0	0	0	0	0	0	0	0	0	0	0	0	0	0	0	0	0	0	0	0	0	0	0	0	0	0	0	0	0	0	0	0	0	0	0	0	0	0	0	0	0	0	0	0
Otu1836	0	0	0	0	0	0	0	0	0	0	0	0	0	0	0	0	0	0	0	0	0	0	0	0	0	0	0	0	0	0	0	2	0	0	0	0	0	0	0	0	0	0	0	0	0	0	0	0	0
Otu1837	0	0	0	0	0	0	0	0	0	0	0	0	0	0	0	0	0	0	0	0	0	0	0	0	0	0	0	0	0	0	0	0	0	0	0	0	0	0	0	0	0	0	0	0	2	0	0	0	0
Otu1838	0	0	0	0	0	0	0	0	0	0	0	0	0	0	0	0	0	0	0	0	0	0	0	0	0	0	0	0	0	0	0	0	0	0	0	0	0	0	0	2	0	0	0	0	0	0	0	0	0
Otu1839	0	0	0	0	0	0	0	0	0	0	0	0	0	0	0	0	0	0	0	0	0	0	0	0	0	0	0	0	0	0	0	0	0	0	0	0	0	0	0	2	0	0	0	0	0	0	0	0	0
Otu1840	0	0	0	0	0	0	0	0	0	0	0	0	0	0	0	0	0	0	0	0	0	0	0	0	1	0	0	0	0	0	0	0	0	0	0	0	0	0	0	0	0	1	0	0	0	0	0	0	0
Otu1841	0	0	0	0	0	0	0	2	0	0	0	0	0	0	0	0	0	0	0	0	0	0	0	0	0	0	0	0	0	0	0	0	0	0	0	0	0	0	0	0	0	0	0	0	0	0	0	0	0
Otu1842	0	0	0	0	0	0	0	0	0	0	0	0	0	0	0	0	0	0	0	0	0	0	0	0	0	0	0	0	0	0	0	0	0	0	0	0	0	0	0	0	0	0	0	0	0	0	0	0	0
Otu1843	0	0	0	0	0	0	0	0	0	0	0	0	0	0	0	0	0	0	0	0	0	0	0	0	0	0	0	0	0	0	0	0	0	0	0	0	0	0	0	0	0	0	0	0	0	0	0	0	0
Otu1844	0	0	0	0	0	0	0	0	0	0	0	0	0	0	0	0	0	0	0	0	0	0	0	0	0	0	0	0	0	0	0	0	0	0	0	0	0	0	0	0	0	0	0	0	0	0	0	0	0
Otu1845	0	0	0	0	0	0	0	0	0	0	0	0	0	0	0	0	0	0	0	0	0	0	0	0	0	0	0	0	0	0	0	2	0	0	0	0	0	0	0	0	0	0	0	0	0	0	0	0	0
Otu1846	0	0	0	0	0	0	0	0	0	0	0	0	0	0	0	0	0	0	0	0	0	0	2	0	0	0	0	0	0	0	0	0	0	0	0	0	0	0	0	0	0	0	0	0	0	0	0	0	0
Otu1847	0	0	0	0	0	0	0	0	0	0	0	0	0	0	0	2	0	0	0	0	0	0	0	0	0	0	0	0	0	0	0	0	0	0	0	0	0	0	0	0	0	0	0	0	0	0	0	0	0
Otu1848	0	0	0	0	0	0	0	0	0	0	0	0	0	0	0	2	0	0	0	0	0	0	0	0	0	0	0	0	0	0	0	0	0	0	0	0	0	0	0	0	0	0	0	0	0	0	0	0	0
Otu1849	0	0	0	0	0	0	0	0	0	0	0	0	0	0	0	0	0	0	0	0	0	0	0	0	0	0	0	0	0	0	0	0	0	0	0	0	0	0	0	0	0	0	0	0	0	0	2	0	0
Otu1850	0	0	0	0	0	0	0	0	0	0	0	0	0	0	0	0	0	0	0	0	0	0	0	0	0	0	0	0	0	0	0	0	0	0	0	0	0	0	0	0	0	0	0	0	0	0	2	0	0
Otu1851	0	0	0	0	0	0	0	0	0	0	0	0	0	0	0	0	0	0	0	0	0	0	0	0	0	0	0	0	0	0	0	0	0	0	0	0	0	0	0	0	0	0	0	0	0	0	0	0	0
Otu1852	2	0	0	0	0	0	0	0	0	0	0	0	0	0	0	0	0	0	0	0	0	0	0	0	0	0	0	0	0	0	0	0	0	0	0	0	0	0	0	0	0	0	0	0	0	0	0	0	0
Otu1853	0	0	0	0	0	0	0	0	0	0	0	0	0	0	0	0	0	0	0	0	0	0	0	0	0	0	0	0	0	0	0	0	0	0	0	0	0	0	0	0	0	0	0	0	0	0	0	0	0
Otu1854	0	0	0	0	0	0	0	0	0	0	0	0	0	0	0	0	0	0	0	0	0	0	0	0	0	0	0	0	2	0	0	0	0	0	0	0	0	0	0	0	0	0	0	0	0	0	0	0	0
Otu1855	0	0	0	0	0	0	0	0	0	0	0	0	0	0	0	2	0	0	0	0	0	0	0	0	0	0	0	0	0	0	0	0	0	0	0	0	0	0	0	0	0	0	0	0	0	0	0	0	0
Otu1856	0	0	0	0	0	0	0	0	0	0	0	0	0	0	0	0	0	0	0	0	0	0	0	1	0	0	0	0	0	0	0	0	0	0	0	1	0	0	0	0	0	0	0	0	0	0	0	0	0
Otu1857	0	0	0	0	0	0	0	0	0	2	0	0	0	0	0	0	0	0	0	0	0	0	0	0	0	0	0	0	0	0	0	0	0	0	0	0	0	0	0	0	0	0	0	0	0	0	0	0	0
Otu1858	0	0	0	0	0	0	0	0	0	0	0	0	0	0	0	0	0	0	0	0	0	0	0	0	0	0	0	0	2	0	0	0	0	0	0	0	0	0	0	0	0	0	0	0	0	0	0	0	0
Otu1859	0	0	0	0	0	0	0	0	0	0	0	0	0	0	0	0	0	0	0	0	0	0	0	0	1	0	0	0	0	0	0	0	0	0	0	0	0	1	0	0	0	0	0	0	0	0	0	0	0
Otu1860	0	0	0	0	0	0	2	0	0	0	0	0	0	0	0	0	0	0	0	0	0	0	0	0	0	0	0	0	0	0	0	0	0	0	0	0	0	0	0	0	0	0	0	0	0	0	0	0	0
Otu1861	0	0	0	0	0	0	0	0	0	0	0	0	0	0	0	0	0	0	0	0	0	0	0	0	0	0	0	0	0	0	0	0	0	0	0	0	0	0	0	0	0	0	0	0	0	0	0	0	0
Otu1862	0	0	0	0	0	0	0	0	0	0	0	0	0	0	0	0	0	0	0	0	0	0	0	0	0	0	0	0	0	0	0	0	0	0	0	0	0	0	0	0	0	0	0	0	0	0	2	0	0
Otu1863	0	0	0	0	0	0	0	0	0	0	0	0	0	0	0	0	0	0	0	0	0	0	0	0	0	0	0	2	0	0	0	0	0	0	0	0	0	0	0	0	0	0	0	0	0	0	0	0	0
Otu1864	0	0	0	0	0	0	0	0	0	0	0	0	0	0	0	0	0	0	0	0	0	0	0	0	0	0	0	0	0	0	0	0	0	0	0	0	0	0	0	0	0	0	0	0	0	0	0	0	0
Otu1865	0	0	0	0	0	0	0	0	0	0	0	0	0	0	2	0	0	0	0	0	0	0	0	0	0	0	0	0	0	0	0	0	0	0	0	0	0	0	0	0	0	0	0	0	0	0	0	0	0
Otu1866	0	0	0	0	0	0	0	0	0	0	0	0	0	0	0	0	0	0	0	0	0	0	0	0	0	0	0	0	0	0	0	0	0	0	0	0	0	0	0	0	0	0	0	0	0	0	0	0	0
Otu1867	0	0	0	0	0	0	0	0	0	0	0	0	0	0	0	0	0	0	0	0	0	0	0	0	0	0	0	0	0	0	0	0	0	0	0	0	0	1	0	0	1	0	0	0	0	0	0	0	0
Otu1868	0	0	0	0	0	0	0	0	0	0	0	0	0	0	0	0	0	0	0	0	0	0	2	0	0	0	0	0	0	0	0	0	0	0	0	0	0	0	0	0	0	0	0	0	0	0	0	0	0
Otu1869	0	0	0	0	0	0	0	0	0	0	0	0	0	0	0	0	0	0	0	0	0	0	0	0	0	0	0	0	0	0	0	0	0	0	0	0	0	0	0	0	0	0	0	0	0	0	0	0	0
Otu1870	0	0	0	0	0	0	0	0	0	0	0	0	0	0	0	0	0	0	0	0	0	0	0	0	0	0	1	0	0	0	0	0	0	0	0	0	0	0	0	0	0	0	0	0	0	0	0	0	0
Otu1871	0	0	0	0	0	0	0	0	0	0	0	0	0	0	0	0	0	0	0	0	0	0	0	0	0	0	0	0	0	0	0	0	0	0	0	0	0	0	0	0	0	0	0	0	0	0	0	0	0
Otu1872	0	0	0	0	0	0	0	0	0	2	0	0	0	0	0	0	0	0	0	0	0	0	0	0	0	0	0	0	0	0	0	0	0	0	0	0	0	0	0	0	0	0	0	0	0	0	0	0	0
Otu1873	0	0	0	0	0	0	0	0	0	0	0	0	0	0	0	0	0	0	2	0	0	0	0	0	0	0	0	0	0	0	0	0	0	0	0	0	0	0	0	0	0	0	0	0	0	0	0	0	0
Otu1874	0	0	0	0	0	0	0	0	0	0	0	0	0	0	0	0	0	0	0	0	0	0	0	0	0	0	0	0	0	0	0	0	0	0	0	0	0	0	0	0	0	0	0	0	0	0	0	0	0
Otu1875	0	0	0	0	0	0	0	0	0	0	0	0	0	0	0	2	0	0	0	0	0	0	0	0	0	0	0	0	0	0	0	0	0	0	0	0	0	0	0	0	0	0	0	0	0	0	0	0	0
Otu1876	0	0	0	0	0	0	0	0	0	0	0	0	0	0	0	0	0	0	0	0	0	0	0	0	0	0	0	0	0	0	0	0	0	0	0	0	0	0	0	0	0	0	0	0	0	0	0	0	0
Otu1877	0	0	0	0	0	0	0	0	0	0	0	0	0	0	0	2	0	0	0	0	0	0	0	0	0	0	0	0	0	0	0	0	0	0	0	0	0	0	0	0	0	0	0	0	0	0	0	0	0
Otu1878	0	0	0	0	0	0	0	0	0	0	0	0	0	0	0	0	0	0	0	0	0	0	0	0	0	0	0	0	0	0	0	0	0	0	0	0	0	0	0	0	0	0	0	0	0	2	0	0	0
Otu1879	0	0	0	0	0	0	0	0	0	0	2	0	0	0	0	0	0	0	0	0	0	0	0	0	0	0	0	0	0	0	0	0	0	0	0	0	0	0	0	0	0	0	0	0	0	0	0	0	0
Otu1880	0	0	0	0	0	0	0	0	0	0	0	0	0	0	0	0	0	0	0	0	0	0	0	0	0	0	0	0	0	0	0	2	0	0	0	0	0	0	0	0	0	0	0	0	0	0	0	0	0
Otu1881	0	0	0	0	0	0	0	0	0	0	0	0	0	0	2	0	0	0	0	0	0	0	0	0	0	0	0	0	0	0	0	0	0	0	0	0	0	0	0	0	0	0	0	0	0	0	0	0	0
Otu1882	0	0	0	0	0	0	0	0	0	0	2	0	0	0	0	0	0	0	0	0	0	0	0	0	0	0	0	0	0	0	0	0	0	0	0	0	0	0	0	0	0	0	0	0	0	0	0	0	0
Otu1883	0	0	0	0	0	0	0	0	0	1	0	0	1	0	0	0	0	0	0	0	0	0	0	0	0	0	0	0	0	0	0	0	0	0	0	0	0	0	0	0	0	0	0	0	0	0	0	0	0
Otu1884	0	0	0	0	0	0	0	0	0	2	0	0	0	0	0	0	0	0	0	0	0	0	0	0	0	0	0	0	0	0	0	0	0	0	0	0	0	0	0	0	0	0	0	0	0	0	0	0	0
Otu1885	0	0	0	0	0	0	0	0	0	0	0	0	0	0	0	0	0	0	0	0	0	2	0	0	0	0	0	0	0	0	0	0	0	0	0	0	0	0	0	0	0	0	0	0	0	0	0	0	0
Otu1886	0	0	0	0	0	0	0	0	0	0	0	0	0	0	0	0	0	0	0	0	0	0	0	0	0	0	0	0	0	0	0	0	0	0	0	0	0	0	0	0	2	0	0	0	0	0	0	0	0
Otu1887	0	0	0	0	2	0	0	0	0	0	0	0	0	0	0	0	0	0	0	0	0	0	0	0	0	0	0	0	0	0	0	0	0	0	0	0	0	0	0	0	0	0	0	0	0	0	0	0	0
Otu1888	0	0	0	1	0	0	0	0	0	0	0	0	0	1	0	0	0	0	0	0	0	0	0	0	0	0	0	0	0	0	0	0	0	0	0	0	0	0	0	0	0	0	0	0	0	0	0	0	0
Otu1889	0	0	0	2	0	0	0	0	0	0	0	0	0	0	0	0	0	0	0	0	0	0	0	0	0	0	0	0	0	0	0	0	0	0	0	0	0	0	0	0	0	0	0	0	0	0	0	0	0
Otu1890	0	0	0	0	0	0	0	0	0	0	0	0	0	0	0	0	0	0	0	0	0	0	0	0	0	0	0	0	0	0	0	1	0	0	0	0	0	0	0	0	0	0	0	0	0	0	0	0	0
Otu1891	0	0	0	0	0	0	0	0	0	0	0	0	0	0	0	0	0	0	0	0	0	0	0	2	0	0	0	0	0	0	0	0	0	0	0	0	0	0	0	0	0	0	0	0	0	0	0	0	0
Otu1892	0	0	0	0	0	0	0	0	0	0	0	0	0	0	0	0	0	0	0	0	0	0	0	0	0	0	0	0	0	0	0	0	0	0	0	0	0	0	0	0	0	0	0	0	0	0	2	0	0
Otu1893	0	0	0	0	0	0	0	0	0	0	0	0	0	0	0	0	0	0	0	0	0	0	1	0	0	1	0	0	0	0	0	0	0	0	0	0	0	0	0	0	0	0	0	0	0	0	0	0	0
Otu1894	0	0	0	0	0	0	0	0	0	0	0	0	0	0	0	0	0	0	0	0	0	0	0	0	0	0	0	0	0	0	0	0	0	0	0	0	0	0	0	0	0	0	0	0	0	0	0	0	0
Otu1895	0	0	0	2	0	0	0	0	0	0	0	0	0	0	0	0	0	0	0	0	0	0	0	0	0	0	0	0	0	0	0	0	0	0	0	0	0	0	0	0	0	0	0	0	0	0	0	0	0
Otu1896	0	0	0	0	0	0	2	0	0	0	0	0	0	0	0	0	0	0	0	0	0	0	0	0	0	0	0	0	0	0	0	0	0	0	0	0	0	0	0	0	0	0	0	0	0	0	0	0	0
Otu1897	0	0	0	0	0	0	0	0	0	0	0	0	0	0	0	0	0	0	0	0	0	0	0	0	0	0	0	0	0	0	0	0	0	0	1	0	0	0	1	0	0	0	0	0	0	0	0	0	0
Otu1898	0	0	0	0	0	0	0	0	0	0	0	0	0	0	0	0	0	0	0	0	0	0	0	0	0	0	0	0	0	0	0	0	0	0	0	0	0	0	0	0	0	0	0	0	0	0	0	0	0
Otu1899	0	0	0	0	0	0	0	0	0	0	0	0	0	0	0	0	0	0	0	0	0	0	0	0	0	0	0	0	0	0	0	1	0	0	0	0	0	0	1	0	0	0	0	0	0	0	0	0	0
Otu1900	0	0	0	0	0	0	0	0	0	0	0	0	0	0	0	0	0	0	0	0	0	0	0	0	0	0	0	0	0	0	0	0	0	0	0	0	0	0	0	0	0	0	0	0	0	0	0	0	0
Otu1901	0	0	0	0	0	0	0	0	0	0	0	0	0	0	0	0	0	0	0	0	0	0	0	0	0	0	0	0	0	0	0	0	0	0	0	0	0	2	0	0	0	0	0	0	0	0	0	0	0
Otu1902	0	0	0	0	0	0	0	0	0	0	0	0	0	0	0	0	0	0	0	0	0	0	0	0	0	0	0	0	0	0	0	0	0	0	0	0	0	0	0	0	0	0	2	0	0	0	0	0	0
Otu1903	0	0	0	0	0	0	0	0	0	0	0	0	0	0	0	0	0	0	0	0	0	0	0	0	0	0	0	0	0	0	0	0	0	0	0	0	0	0	0	0	0	0	0	0	0	0	0	0	0
Otu1904	0	0	0	0	0	0	0	0	0	0	0	0	0	0	0	0	0	0	0	0	0	0	0	0	0	0	0	0	0	0	0	0	0	0	0	0	0	0	0	0	0	0	0	0	0	0	0	0	0
Otu1905	0	0	0	0	0	0	0	0	0	0	0	0	0	0	0	0	0	0	0	0	0	0	0	0	0	0	0	0	0	0	0	0	0	0	0	0	0	0	0	0	0	0	0	0	0	0	0	0	0
Otu1906	0	0	0	0	0	0	0	0	0	0	0	0	0	0	0	0	0	0	0	0	0	0	0	0	0	0	0	0	0	0	0	0	0	0	0	0	0	0	0	0	0	0	0	0	0	0	0	0	0
Otu1907	0	0	0	0	0	0	0	0	0	0	0	0	0	0	0	0	0	0	0	0	0	0	0	0	0	0	0	0	0	0	0	0	0	0	0	0	0	0	0	0	0	0	0	0	1	0	0	0	0
Otu1908	0	0	0	0	0	0	0	0	0	0	0	0	0	0	0	0	0	0	0	0	0	0	0	0	0	0	0	0	0	0	0	0	0	0	0	0	0	0	0	0	0	0	0	0	0	0	2	0	0
Otu1909	0	0	0	0	0	0	0	0	0	0	0	0	0	0	0	0	0	0	0	0	0	0	0	0	0	0	0	0	0	0	0	0	0	0	0	0	0	0	0	0	0	0	0	0	0	0	0	0	0
Otu1910	0	0	0	0	0	0	0	0	0	0	0	0	0	0	0	0	0	0	0	0	0	0	0	0	0	0	0	0	0	0	0	0	0	0	0	0	0	0	0	0	0	0	0	0	2	0	0	0	0
Otu1911	0	0	0	0	0	0	0	0	0	0	0	1	0	0	0	0	0	0	0	0	1	0	0	0	0	0	0	0	0	0	0	0	0	0	0	0	0	0	0	0	0	0	0	0	0	0	0	0	0
Otu1912	0	0	0	0	0	0	0	0	0	0	0	0	0	0	0	0	0	0	0	0	0	0	0	0	0	0	0	0	0	0	0	0	0	0	0	0	0	0	0	0	0	0	0	0	0	0	0	0	0
Otu1913	0	0	0	0	0	0	0	0	0	1	0	0	0	0	1	0	0	0	0	0	0	0	0	0	0	0	0	0	0	0	0	0	0	0	0	0	0	0	0	0	0	0	0	0	0	0	0	0	0
Otu1914	0	0	0	0	0	0	0	0	0	0	0	0	0	0	0	0	0	0	0	0	0	0	0	0	0	0	0	0	0	0	0	0	0	0	0	0	0	0	0	0	0	0	0	0	0	0	0	0	0
Otu1915	0	0	0	0	0	0	0	0	0	0	0	0	0	0	0	0	0	0	0	0	0	0	0	0	0	0	0	0	0	0	0	0	0	0	0	0	0	0	0	0	0	0	0	0	0	0	0	0	0
Otu1916	0	0	0	2	0	0	0	0	0	0	0	0	0	0	0	0	0	0	0	0	0	0	0	0	0	0	0	0	0	0	0	0	0	0	0	0	0	0	0	0	0	0	0	0	0	0	0	0	0
Otu1917	0	0	0	0	0	0	0	0	0	0	0	0	0	0	0	0	0	0	0	0	0	0	0	0	0	0	0	0	0	0	0	0	0	0	0	0	0	0	0	0	0	0	0	0	0	0	0	0	0
Otu1918	0	0	0	0	0	0	0	0	0	2	0	0	0	0	0	0	0	0	0	0	0	0	0	0	0	0	0	0	0	0	0	0	0	0	0	0	0	0	0	0	0	0	0	0	0	0	0	0	0
Otu1919	0	0	1	0	0	0	0	0	0	0	0	0	0	1	0	0	0	0	0	0	0	0	0	0	0	0	0	0	0	0	0	0	0	0	0	0	0	0	0	0	0	0	0	0	0	0	0	0	0
Otu1920	0	0	0	0	0	0	0	0	0	0	0	0	0	0	0	0	0	0	0	0	0	0	0	0	0	0	0	0	0	0	0	0	0	0	0	0	0	0	0	0	0	0	0	0	0	0	0	0	0
Otu1921	0	0	0	0	0	0	0	0	0	0	0	0	0	0	0	0	0	0	0	0	0	0	1	0	0	0	0	0	0	0	0	0	0	0	0	0	0	0	1	0	0	0	0	0	0	0	0	0	0
Otu1922	0	0	0	0	0	0	0	0	0	0	0	0	0	0	0	0	0	0	0	0	0	0	0	0	0	0	0	0	0	0	0	0	0	0	0	0	0	0	0	0	0	0	0	0	0	0	0	0	0
Otu1923	0	0	0	0	0	0	0	0	0	2	0	0	0	0	0	0	0	0	0	0	0	0	0	0	0	0	0	0	0	0	0	0	0	0	0	0	0	0	0	0	0	0	0	0	0	0	0	0	0
Otu1924	0	0	0	0	0	0	0	0	0	0	0	0	0	0	0	0	2	0	0	0	0	0	0	0	0	0	0	0	0	0	0	0	0	0	0	0	0	0	0	0	0	0	0	0	0	0	0	0	0
Otu1925	0	0	0	2	0	0	0	0	0	0	0	0	0	0	0	0	0	0	0	0	0	0	0	0	0	0	0	0	0	0	0	0	0	0	0	0	0	0	0	0	0	0	0	0	0	0	0	0	0
Otu1926	0	0	0	0	0	0	0	0	0	0	0	0	0	0	0	0	0	0	0	0	0	0	0	0	0	0	0	0	0	0	0	0	0	0	0	0	0	0	0	0	0	0	0	0	0	0	0	0	0
Otu1927	0	0	0	0	0	0	0	0	0	0	0	0	0	0	0	0	0	0	0	0	0	0	0	0	0	0	0	0	0	0	0	0	0	0	0	0	0	0	0	0	0	1	0	0	1	0	0	0	0
Otu1928	0	0	0	0	0	0	0	0	0	0	0	0	0	0	0	0	0	0	0	0	0	0	0	0	0	0	0	0	0	0	0	0	0	0	0	0	0	0	0	0	0	0	0	0	0	0	0	0	0
Otu1929	0	0	0	0	0	0	0	0	0	0	0	0	0	0	0	0	0	0	0	0	0	0	0	0	0	0	0	0	0	0	0	0	0	0	0	0	0	0	0	0	0	0	0	0	0	0	0	0	0
Otu1930	0	0	0	0	0	0	0	0	0	0	0	0	0	0	0	0	0	0	0	0	0	0	0	0	0	0	0	0	0	0	0	0	0	0	0	0	0	0	0	0	0	0	0	0	0	0	0	0	0
Otu1931	0	0	0	0	0	0	0	0	0	0	0	0	0	0	0	2	0	0	0	0	0	0	0	0	0	0	0	0	0	0	0	0	0	0	0	0	0	0	0	0	0	0	0	0	0	0	0	0	0
Otu1932	0	0	0	0	0	0	0	0	0	0	0	0	0	0	0	0	0	0	0	0	0	0	0	0	0	0	0	0	0	0	0	0	0	0	0	0	0	0	0	0	0	0	0	0	1	0	0	0	0
Otu1933	0	0	0	0	0	0	0	0	0	0	0	0	0	0	0	0	0	0	0	0	0	0	0	0	0	0	0	0	0	0	0	2	0	0	0	0	0	0	0	0	0	0	0	0	0	0	0	0	0
Otu1934	0	0	0	0	0	0	0	0	0	0	0	0	0	2	0	0	0	0	0	0	0	0	0	0	0	0	0	0	0	0	0	0	0	0	0	0	0	0	0	0	0	0	0	0	0	0	0	0	0
Otu1935	0	2	0	0	0	0	0	0	0	0	0	0	0	0	0	0	0	0	0	0	0	0	0	0	0	0	0	0	0	0	0	0	0	0	0	0	0	0	0	0	0	0	0	0	0	0	0	0	0
Otu1936	0	0	0	0	0	0	0	0	0	0	0	0	0	0	0	0	0	0	0	0	0	0	0	0	0	0	0	0	0	0	0	0	0	0	0	0	0	0	0	0	0	0	0	0	0	0	0	0	0
Otu1937	0	0	0	0	0	0	0	0	0	0	0	0	0	0	0	0	0	0	0	0	0	0	0	0	0	0	0	0	0	0	0	2	0	0	0	0	0	0	0	0	0	0	0	0	0	0	0	0	0
Otu1938	0	0	0	0	0	0	0	0	0	0	0	0	0	0	0	0	0	0	0	0	0	0	0	0	0	0	0	0	0	0	0	1	0	0	0	0	0	0	0	0	0	0	0	0	0	0	0	0	0
Otu1939	0	0	0	0	0	0	0	0	0	0	0	0	0	0	0	0	0	0	0	0	0	0	0	0	0	0	0	0	0	0	0	0	0	0	0	0	0	0	0	0	0	0	0	0	0	0	0	0	0
Otu1940	0	0	0	0	0	0	0	0	0	0	0	0	0	0	0	0	0	0	0	0	0	0	0	0	0	0	0	0	0	0	0	0	0	0	0	0	0	0	0	0	0	0	0	0	0	0	0	0	0
Otu1941	0	0	0	0	0	0	0	0	0	0	0	0	0	0	0	0	0	0	0	0	0	0	0	0	0	0	0	0	0	0	0	0	0	0	0	0	0	0	0	0	0	0	0	0	0	0	0	0	0
Otu1942	0	0	0	0	0	0	0	0	0	0	0	0	0	0	0	0	0	0	0	0	0	2	0	0	0	0	0	0	0	0	0	0	0	0	0	0	0	0	0	0	0	0	0	0	0	0	0	0	0
Otu1943	0	0	0	0	0	0	0	0	0	0	0	0	0	0	0	0	0	0	0	0	0	0	0	0	0	0	0	0	0	0	0	0	0	0	0	0	0	0	0	0	0	0	0	0	0	0	0	0	0
Otu1944	0	0	0	0	0	0	0	0	0	0	0	0	0	0	0	0	0	0	0	0	0	0	0	0	0	0	0	0	0	0	2	0	0	0	0	0	0	0	0	0	0	0	0	0	0	0	0	0	0
Otu1945	0	0	0	0	0	0	0	0	0	0	0	0	0	2	0	0	0	0	0	0	0	0	0	0	0	0	0	0	0	0	0	0	0	0	0	0	0	0	0	0	0	0	0	0	0	0	0	0	0
Otu1946	0	0	0	0	0	0	0	0	0	0	0	0	0	0	0	0	0	0	0	0	0	0	0	0	0	0	0	0	0	0	0	0	0	0	0	0	0	0	0	0	0	0	0	0	0	0	0	0	0
Otu1947	0	2	0	0	0	0	0	0	0	0	0	0	0	0	0	0	0	0	0	0	0	0	0	0	0	0	0	0	0	0	0	0	0	0	0	0	0	0	0	0	0	0	0	0	0	0	0	0	0
Otu1948	0	0	0	0	0	0	0	2	0	0	0	0	0	0	0	0	0	0	0	0	0	0	0	0	0	0	0	0	0	0	0	0	0	0	0	0	0	0	0	0	0	0	0	0	0	0	0	0	0
Otu1949	0	0	0	2	0	0	0	0	0	0	0	0	0	0	0	0	0	0	0	0	0	0	0	0	0	0	0	0	0	0	0	0	0	0	0	0	0	0	0	0	0	0	0	0	0	0	0	0	0
Otu1950	0	0	0	0	0	0	0	0	0	0	0	0	0	0	0	2	0	0	0	0	0	0	0	0	0	0	0	0	0	0	0	0	0	0	0	0	0	0	0	0	0	0	0	0	0	0	0	0	0
Otu1951	0	0	0	0	0	0	0	0	0	0	0	0	0	2	0	0	0	0	0	0	0	0	0	0	0	0	0	0	0	0	0	0	0	0	0	0	0	0	0	0	0	0	0	0	0	0	0	0	0
Otu1952	0	0	0	0	0	0	0	0	0	0	0	0	0	0	0	0	0	0	0	0	0	0	0	0	0	0	0	0	0	0	0	0	0	0	0	0	0	0	0	0	0	0	0	0	0	0	0	0	0
Otu1953	0	0	0	0	0	0	0	0	0	0	0	0	0	0	0	0	0	0	0	0	0	0	0	0	0	0	0	0	0	0	0	0	2	0	0	0	0	0	0	0	0	0	0	0	0	0	0	0	0
Otu1954	0	0	0	0	0	0	0	0	0	0	0	0	0	0	0	0	0	0	0	0	0	0	0	0	0	0	0	0	0	0	0	2	0	0	0	0	0	0	0	0	0	0	0	0	0	0	0	0	0
Otu1955	0	0	0	0	0	0	0	0	0	0	0	0	0	0	0	0	0	0	0	0	0	0	0	0	0	0	0	0	0	0	0	0	0	0	0	0	0	0	0	0	0	0	0	0	0	0	0	0	0
Otu1956	0	0	0	0	0	0	0	2	0	0	0	0	0	0	0	0	0	0	0	0	0	0	0	0	0	0	0	0	0	0	0	0	0	0	0	0	0	0	0	0	0	0	0	0	0	0	0	0	0
Otu1957	0	0	0	0	0	0	0	0	0	0	0	0	0	0	0	0	0	0	0	0	0	0	0	0	0	0	0	0	0	0	0	2	0	0	0	0	0	0	0	0	0	0	0	0	0	0	0	0	0
Otu1958	0	0	0	0	0	0	0	0	0	0	0	0	0	0	0	0	0	0	0	0	0	0	0	0	0	0	0	0	0	0	0	0	0	0	0	0	0	0	0	0	0	0	0	0	0	0	0	0	0
Otu1959	0	0	0	0	0	0	0	0	0	0	0	0	0	0	0	0	0	0	0	0	0	0	0	0	0	0	0	0	0	0	0	0	0	0	0	0	0	0	0	0	0	0	0	0	0	0	2	0	0
Otu1960	0	0	0	0	0	0	0	0	0	0	0	0	0	0	0	0	0	0	0	0	0	0	0	0	0	0	0	0	0	0	0	0	0	0	0	0	0	0	0	0	0	0	0	0	0	0	2	0	0
Otu1961	0	0	0	0	0	0	0	0	0	0	0	0	0	0	0	2	0	0	0	0	0	0	0	0	0	0	0	0	0	0	0	0	0	0	0	0	0	0	0	0	0	0	0	0	0	0	0	0	0
Otu1962	0	0	0	0	0	0	0	0	0	0	0	0	2	0	0	0	0	0	0	0	0	0	0	0	0	0	0	0	0	0	0	0	0	0	0	0	0	0	0	0	0	0	0	0	0	0	0	0	0
Otu1963	0	0	0	0	0	0	1	0	0	0	0	0	0	0	0	0	1	0	0	0	0	0	0	0	0	0	0	0	0	0	0	0	0	0	0	0	0	0	0	0	0	0	0	0	0	0	0	0	0
Otu1964	0	0	0	0	0	0	0	0	0	0	0	0	0	0	0	0	0	0	0	0	0	0	0	0	0	0	0	0	0	0	0	0	0	0	0	0	0	0	0	0	0	0	2	0	0	0	0	0	0
Otu1965	0	0	0	0	0	2	0	0	0	0	0	0	0	0	0	0	0	0	0	0	0	0	0	0	0	0	0	0	0	0	0	0	0	0	0	0	0	0	0	0	0	0	0	0	0	0	0	0	0
Otu1966	1	0	0	0	0	0	0	0	0	0	0	0	0	0	0	0	1	0	0	0	0	0	0	0	0	0	0	0	0	0	0	0	0	0	0	0	0	0	0	0	0	0	0	0	0	0	0	0	0
Otu1967	0	0	0	0	0	0	0	0	0	0	0	0	0	0	0	0	0	0	0	0	0	0	0	0	0	0	0	0	0	0	0	0	0	0	0	0	0	0	0	0	0	0	1	0	0	0	0	0	0
Otu1968	2	0	0	0	0	0	0	0	0	0	0	0	0	0	0	0	0	0	0	0	0	0	0	0	0	0	0	0	0	0	0	0	0	0	0	0	0	0	0	0	0	0	0	0	0	0	0	0	0
Otu1969	0	0	0	0	0	0	0	2	0	0	0	0	0	0	0	0	0	0	0	0	0	0	0	0	0	0	0	0	0	0	0	0	0	0	0	0	0	0	0	0	0	0	0	0	0	0	0	0	0
Otu1970	0	0	0	0	0	0	0	0	0	0	2	0	0	0	0	0	0	0	0	0	0	0	0	0	0	0	0	0	0	0	0	0	0	0	0	0	0	0	0	0	0	0	0	0	0	0	0	0	0
Otu1971	0	0	0	0	0	0	0	0	0	0	0	0	0	0	0	2	0	0	0	0	0	0	0	0	0	0	0	0	0	0	0	0	0	0	0	0	0	0	0	0	0	0	0	0	0	0	0	0	0
Otu1972	0	0	0	0	0	0	0	0	0	0	0	0	0	0	0	0	0	0	0	0	0	0	0	0	0	0	0	0	2	0	0	0	0	0	0	0	0	0	0	0	0	0	0	0	0	0	0	0	0
Otu1973	0	0	0	0	0	0	0	0	0	0	0	0	0	0	0	0	0	0	0	0	0	0	0	0	0	0	0	0	0	0	0	0	0	0	0	0	0	0	0	0	0	0	0	0	0	0	2	0	0
Otu1974	0	0	0	0	0	0	0	0	0	0	0	0	0	0	0	0	0	0	0	0	0	0	0	0	0	0	0	0	2	0	0	0	0	0	0	0	0	0	0	0	0	0	0	0	0	0	0	0	0
Otu1975	0	0	0	0	0	0	0	0	0	0	0	0	0	0	0	0	0	0	0	0	0	0	0	0	0	0	0	2	0	0	0	0	0	0	0	0	0	0	0	0	0	0	0	0	0	0	0	0	0
Otu1976	0	2	0	0	0	0	0	0	0	0	0	0	0	0	0	0	0	0	0	0	0	0	0	0	0	0	0	0	0	0	0	0	0	0	0	0	0	0	0	0	0	0	0	0	0	0	0	0	0
Otu1977	0	0	0	0	0	0	0	0	0	0	0	0	0	0	0	0	0	0	0	0	0	0	0	0	0	0	0	0	0	0	0	0	0	0	0	0	0	0	0	0	0	0	0	0	0	0	0	0	0
Otu1978	0	0	0	0	0	0	0	0	0	0	0	0	0	0	0	0	0	0	0	0	0	0	0	0	0	0	0	0	2	0	0	0	0	0	0	0	0	0	0	0	0	0	0	0	0	0	0	0	0
Otu1979	0	0	0	0	0	0	2	0	0	0	0	0	0	0	0	0	0	0	0	0	0	0	0	0	0	0	0	0	0	0	0	0	0	0	0	0	0	0	0	0	0	0	0	0	0	0	0	0	0
Otu1980	0	0	0	0	0	0	0	0	0	2	0	0	0	0	0	0	0	0	0	0	0	0	0	0	0	0	0	0	0	0	0	0	0	0	0	0	0	0	0	0	0	0	0	0	0	0	0	0	0
Otu1981	0	0	0	1	0	0	0	0	0	0	0	0	0	0	1	0	0	0	0	0	0	0	0	0	0	0	0	0	0	0	0	0	0	0	0	0	0	0	0	0	0	0	0	0	0	0	0	0	0
Otu1982	0	0	0	0	0	0	0	0	0	0	0	0	0	0	0	0	0	0	0	0	0	0	0	0	0	0	0	0	0	0	2	0	0	0	0	0	0	0	0	0	0	0	0	0	0	0	0	0	0
Otu1983	0	0	0	0	0	0	0	0	0	0	0	0	0	0	0	0	0	0	0	0	0	0	0	0	1	0	0	0	0	0	0	0	0	0	0	0	0	0	1	0	0	0	0	0	0	0	0	0	0
Otu1984	0	0	0	2	0	0	0	0	0	0	0	0	0	0	0	0	0	0	0	0	0	0	0	0	0	0	0	0	0	0	0	0	0	0	0	0	0	0	0	0	0	0	0	0	0	0	0	0	0
Otu1985	0	0	0	0	0	0	0	0	0	2	0	0	0	0	0	0	0	0	0	0	0	0	0	0	0	0	0	0	0	0	0	0	0	0	0	0	0	0	0	0	0	0	0	0	0	0	0	0	0
Otu1986	0	0	0	0	0	0	0	0	0	0	0	0	0	0	0	0	0	0	0	0	0	0	0	0	0	0	0	0	0	0	0	0	0	0	0	0	0	0	0	0	0	0	0	0	0	0	2	0	0
Otu1987	0	0	0	0	0	0	0	0	0	0	0	0	0	0	0	0	0	0	0	0	0	0	0	0	0	0	0	0	0	0	0	0	0	0	0	0	0	0	0	0	0	0	0	0	2	0	0	0	0
Otu1988	0	0	0	0	0	0	0	0	0	0	0	0	0	0	0	0	0	0	0	0	0	0	0	0	0	0	0	0	0	0	0	0	0	0	0	0	0	0	0	0	0	0	0	0	0	0	2	0	0
Otu1989	0	0	0	0	0	0	0	0	0	0	0	0	0	0	0	2	0	0	0	0	0	0	0	0	0	0	0	0	0	0	0	0	0	0	0	0	0	0	0	0	0	0	0	0	0	0	0	0	0
Otu1990	0	0	0	0	0	0	0	0	0	0	0	0	0	0	0	0	0	0	0	0	0	0	0	0	0	0	0	0	0	0	0	0	0	0	0	0	0	0	0	0	0	0	0	0	0	0	0	0	0
Otu1991	0	0	0	0	0	0	0	0	0	0	0	0	0	0	0	0	0	0	0	0	0	0	0	0	0	0	0	0	0	2	0	0	0	0	0	0	0	0	0	0	0	0	0	0	0	0	0	0	0
Otu1992	0	0	0	0	0	0	0	0	0	0	0	0	0	0	0	0	0	0	0	0	0	0	0	0	0	0	0	0	0	0	0	0	0	0	0	2	0	0	0	0	0	0	0	0	0	0	0	0	0
Otu1993	0	0	0	0	0	0	0	0	0	0	0	0	0	0	0	0	0	0	0	0	0	0	0	0	0	0	0	0	0	0	0	0	0	0	2	0	0	0	0	0	0	0	0	0	0	0	0	0	0
Otu1994	0	0	0	0	0	0	0	0	0	0	0	0	0	0	0	0	0	0	0	0	0	0	0	0	0	0	0	0	2	0	0	0	0	0	0	0	0	0	0	0	0	0	0	0	0	0	0	0	0
Otu1995	0	0	0	0	0	0	0	0	0	0	0	0	0	0	0	0	0	0	0	0	0	0	0	0	0	0	0	0	0	0	0	0	0	0	0	2	0	0	0	0	0	0	0	0	0	0	0	0	0
Otu1996	0	0	0	0	0	0	0	0	0	0	0	0	0	0	0	0	0	0	0	0	0	0	0	0	0	0	0	0	0	0	0	0	0	0	0	0	0	0	0	2	0	0	0	0	0	0	0	0	0
Otu1997	0	0	0	0	0	0	0	0	0	0	0	0	0	0	0	0	0	0	0	0	0	0	0	0	0	0	0	0	0	0	0	0	0	0	0	2	0	0	0	0	0	0	0	0	0	0	0	0	0
Otu1998	0	0	0	0	0	0	0	0	0	0	0	0	0	0	0	0	0	0	0	0	0	0	0	0	0	0	0	0	0	0	0	0	0	0	0	0	0	0	2	0	0	0	0	0	0	0	0	0	0
Otu1999	0	0	0	0	0	0	0	0	0	0	0	0	0	2	0	0	0	0	0	0	0	0	0	0	0	0	0	0	0	0	0	0	0	0	0	0	0	0	0	0	0	0	0	0	0	0	0	0	0
[truncated: 401 more rows]
[truncated: 42 more columns]

## Sheet: metadata
ID	Region	Temperature	Genotype
ICN1-30	ICN	30	G1
ICN1-33	ICN	33	G1
ICN1-36	ICN	36	G1
ICN2-30	ICN	30	G2
ICN2-33	ICN	33	G2
ICN2-36	ICN	36	G2
ICN3-30	ICN	30	G3
ICN3-33	ICN	33	G3
ICN3-36	ICN	36	G3
ICN4-30	ICN	30	G4
ICN4-33	ICN	33	G4
ICN4-36	ICN	36	G4
ICN5-30	ICN	30	G5
ICN5-33	ICN	33	G5
ICN5-36	ICN	36	G5
ICN6-30	ICN	30	G6
ICN6-33	ICN	33	G6
ICN6-36	ICN	36	G6
ICN7-30	ICN	30	G7
ICN7-33	ICN	33	G7
ICN7-36	ICN	36	G7
AF1-30	Al Fahal	30	G1
AF1-33	Al Fahal	33	G1
AF1-36	Al Fahal	36	G1
AF2-30	Al Fahal	30	G2
AF2-33	Al Fahal	33	G2
AF2-36	Al Fahal	36	G2
AF3-30	Al Fahal	30	G3
AF3-33	Al Fahal	33	G3
AF3-36	Al Fahal	36	G3
AF4-30	Al Fahal	30	G4
AF4-33	Al Fahal	33	G4
AF4-36	Al Fahal	36	G4
AF5-30	Al Fahal	30	G5
AF5-33	Al Fahal	33	G5
AF5-36	Al Fahal	36	G5
AF6-30	Al Fahal	30	G6
AF6-33	Al Fahal	33	G6
AF6-36	Al Fahal	36	G6
AF7-30	Al Fahal	30	G7
AF7-33	Al Fahal	33	G7
AF7-36	Al Fahal	36	G7
ExT1-30	Exposed Site Tahala	30	G1
ExT1-33	Exposed Site Tahala	33	G1
ExT1-36	Exposed Site Tahala	36	G1
PrT1-30	Protected Site Tahala	30	G1
PrT1-33	Protected Site Tahala	33	G1
PrT1-36	Protected Site Tahala	36	G1
ExT2-30	Exposed Site Tahala	30	G2
ExT2-33	Exposed Site Tahala	33	G2
ExT2-36	Exposed Site Tahala	36	G2
PrT2-30	Protected Site Tahala	30	G2
PrT2-33	Protected Site Tahala	33	G2
PrT2-36	Protected Site Tahala	36	G2
ExT3-30	Exposed Site Tahala	30	G3
ExT3-33	Exposed Site Tahala	33	G3
ExT3-36	Exposed Site Tahala	36	G3
PrT3-30	Protected Site Tahala	30	G3
PrT3-33	Protected Site Tahala	33	G3
PrT3-36	Protected Site Tahala	36	G3
ExT4-30	Exposed Site Tahala	30	G4
ExT4-33	Exposed Site Tahala	33	G4
ExT4-36	Exposed Site Tahala	36	G4
PrT4-30	Protected Site Tahala	30	G4
PrT4-33	Protected Site Tahala	33	G4
PrT4-36	Protected Site Tahala	36	G4
ExT5-30	Exposed Site Tahala	30	G5
ExT5-33	Exposed Site Tahala	33	G5
ExT5-36	Exposed Site Tahala	36	G5
PrT5-30	Protected Site Tahala	30	G5
PrT5-33	Protected Site Tahala	33	G5
PrT5-36	Protected Site Tahala	36	G5
ExT6-30	Exposed Site Tahala	30	G6
ExT6-33	Exposed Site Tahala	33	G6
ExT6-36	Exposed Site Tahala	36	G6
PrT6-30	Protected Site Tahala	30	G6
PrT6-33	Protected Site Tahala	33	G6
PrT6-36	Protected Site Tahala	36	G6
ExT7-30	Exposed Site Tahala	30	G7
ExT7-33	Exposed Site Tahala	33	G7
ExT7-36	Exposed Site Tahala	36	G7
PrT7-30	Protected Site Tahala	30	G7
PrT7-33	Protected Site Tahala	33	G7
PrT7-36	Protected Site Tahala	36	G7

## Sheet: DESeq2_temperatures
Comparing temperatures						Comparing temperatures
	Number of DA OTUs	LFC > 0	LFC < 0			OTU	baseMean	log2FoldChange	lfcSE	stat	pvalue	padj	Comparison	Family	Genus
ICN 30 vs 33	4	1	3			Otu0017	37.8898	-24.0685	2.98737	-8.05673	7.83621e-16	5.7126e-13	ICN 30 vs 33	Rhodobacteraceae	Rhodobacteraceae_unclassified
ICN 30 vs 36	80	78	2			Otu0096	50.7137	9.12871	1.86981	4.88215	1.04934e-06	0.000191242	ICN 30 vs 33	Alteromonadales_unclassified	Alteromonadales_unclassified
ICN 33 vs 36	42	34	8			Otu0155	7.89889	-21.9491	2.99017	-7.34042	2.12923e-13	5.17402e-11	ICN 30 vs 33	Comamonadaceae	Comamonadaceae_unclassified
Al Fahal 30 vs 33	0	0	0			Otu0235	15.3348	-22.8122	2.98847	-7.63343	2.28589e-14	8.33206e-12	ICN 30 vs 33	Rhizobiales_unclassified	Rhizobiales_unclassified
Al Fahal 30 vs 36	0	0	0			Otu0001	4572.57	-6.03835	1.12694	-5.35817	8.40702e-08	4.1753e-07	ICN 30 vs 36	Endozoicimonaceae	Endozoicimonaceae_unclassified
Al Fahal 33 vs 36	0	0	0			Otu0002	35203.3	10.0326	1.22556	8.18611	2.69805e-16	7.98623e-15	ICN 30 vs 36	Vibrionaceae	Photobacterium
Exposed Site Tahala 30 vs 33	0	0	0			Otu0003	171.092	5.01654	1.27282	3.94129	8.10444e-05	0.000266546	ICN 30 vs 36	Alteromonadaceae	Alteromonas
Exposed Site Tahala 30 vs 36	2	2	0			Otu0004	195.402	5.19002	1.45644	3.5635	0.000365946	0.0010832	ICN 30 vs 36	Alteromonadaceae	Alteromonas
Exposed Site Tahala 33 vs 36	1	1	0			Otu0005	2.27777	6.22762	2.56052	2.43217	0.0150086	0.0300171	ICN 30 vs 36	Flavobacteriaceae	Flavobacteriaceae_unclassified
Protected Site Tahala 30 vs 33	0	0	0			Otu0008	8404.41	11.4639	1.43244	8.00308	1.21342e-15	2.99309e-14	ICN 30 vs 36	Rhodobacteraceae	Nautella
Protected Site Tahala 30 vs 36	0	0	0			Otu0010	5.05664	7.07729	2.16688	3.26612	0.00109032	0.0029087	ICN 30 vs 36	Alteromonadaceae	Alteromonas
Protected Site Tahala 33 vs 36	0	0	0			Otu0011	1386.15	15.7176	1.74202	9.02261	1.83662e-19	9.06065e-18	ICN 30 vs 36	Vibrionaceae	Vibrionaceae_unclassified
	129					Otu0012	2917.96	9.00807	1.30142	6.9217	4.46263e-12	6.00426e-11	ICN 30 vs 36	Flavobacteriaceae	Tenacibaculum
						Otu0016	7.063	8.10073	2.50007	3.2402	0.00119446	0.00304792	ICN 30 vs 36	Rhodobacteraceae	Rhodobacteraceae_unclassified
						Otu0018	82.3774	5.32824	1.95133	2.73057	0.00632246	0.0141776	ICN 30 vs 36	Oceanospirillaceae	Oleibacter
						Otu0019	1013.88	10.1855	1.774	5.74151	9.38385e-09	6.0383e-08	ICN 30 vs 36	Rhodobacteraceae	Rhodobacteraceae_unclassified
						Otu0023	418.137	9.36296	1.83519	5.1019	3.36263e-07	1.50809e-06	ICN 30 vs 36	Vibrionaceae	Vibrio
						Otu0024	362.479	6.47248	1.38871	4.6608	3.14979e-06	1.25992e-05	ICN 30 vs 36	Bacteriovoracaceae	Bacteriovoracaceae_unclassified
						Otu0025	13.5669	6.06782	1.80556	3.36063	0.000777637	0.00221327	ICN 30 vs 36	Flavobacteriaceae	Tenacibaculum
						Otu0026	3.30235	6.5097	2.18164	2.98385	0.00284645	0.00668691	ICN 30 vs 36	Pseudoalteromonadaceae	Pseudoalteromonas
						Otu0027	1196.59	15.5067	1.64245	9.44121	3.68498e-21	2.72688e-19	ICN 30 vs 36	Vibrionaceae	Photobacterium
						Otu0028	324.404	5.21204	1.90258	2.73946	0.00615402	0.0140122	ICN 30 vs 36	Rhodobacteraceae	Shimia
						Otu0029	891.191	11.986	1.90987	6.2758	3.47841e-10	2.86003e-09	ICN 30 vs 36	Vibrionaceae	Vibrio
						Otu0036	1.57064	5.92918	2.60029	2.2802	0.0225957	0.0434307	ICN 30 vs 36	Vibrionaceae	Photobacterium
						Otu0039	11.4267	7.35505	1.55835	4.71976	2.36127e-06	9.70744e-06	ICN 30 vs 36	Pseudoalteromonadaceae	Pseudoalteromonas
						Otu0042	28.9326	10.1344	1.99595	5.0775	3.82443e-07	1.66475e-06	ICN 30 vs 36	Clostridiales_unclassified	Clostridiales_unclassified
						Otu0045	48.6822	4.28698	1.34733	3.18182	0.0014635	0.0035508	ICN 30 vs 36	Alteromonadales_unclassified	Alteromonadales_unclassified
						Otu0049	274.067	13.3769	1.82564	7.32728	2.34866e-13	3.47601e-12	ICN 30 vs 36	Campylobacteraceae	Arcobacter
						Otu0051	401.58	13.9312	1.64357	8.47618	2.32705e-17	8.61007e-16	ICN 30 vs 36	Rhodobacteraceae	Nautella
						Otu0052	252.87	10.3234	1.72896	5.97088	2.35983e-09	1.83819e-08	ICN 30 vs 36	Campylobacteraceae	Arcobacter
						Otu0061	309.849	13.5553	1.70802	7.93627	2.08348e-15	4.40506e-14	ICN 30 vs 36	Ferrimonadaceae	Ferrimonas
						Otu0062	2.4318	6.5925	2.77641	2.37447	0.0175744	0.0346801	ICN 30 vs 36	Alteromonadaceae	Glaciecola
						Otu0067	309.178	8.6174	1.60864	5.35696	8.46344e-08	4.1753e-07	ICN 30 vs 36	Flavobacteriaceae	Tenacibaculum
						Otu0071	115.862	12.1317	1.79227	6.76891	1.29753e-11	1.47719e-10	ICN 30 vs 36	Vibrionaceae	Vibrio
						Otu0073	2.92423	6.70263	2.54308	2.63563	0.00839803	0.0175057	ICN 30 vs 36	Oceanospirillaceae	Oceanospirillum
						Otu0079	33.3838	-22.8494	2.98687	-7.64993	2.01088e-14	3.30678e-13	ICN 30 vs 36	Rhodobacteraceae	Rhodobacteraceae_unclassified
						Otu0094	3.77437	7.18738	2.30203	3.12219	0.00179509	0.00428506	ICN 30 vs 36	Oceanospirillaceae	Oleibacter
						Otu0095	391.537	13.8927	1.7676	7.85967	3.85142e-15	7.12513e-14	ICN 30 vs 36	Proteobacteria_unclassified	Proteobacteria_unclassified
						Otu0096	21.3642	9.69176	1.67824	5.77495	7.69766e-09	5.17842e-08	ICN 30 vs 36	Alteromonadales_unclassified	Alteromonadales_unclassified
						Otu0110	5.81617	7.81797	2.23514	3.49775	0.000469196	0.00136159	ICN 30 vs 36	Vibrionaceae	Photobacterium
						Otu0113	92.0882	11.8036	1.7523	6.73607	1.62733e-11	1.72032e-10	ICN 30 vs 36	Campylobacteraceae	Arcobacter
						Otu0120	118.328	12.1593	1.86253	6.5284	6.64749e-11	5.78722e-10	ICN 30 vs 36	Rhodobacteraceae	Rhodobacteraceae_unclassified
						Otu0123	20.8351	9.67116	1.72848	5.59517	2.20405e-08	1.35916e-07	ICN 30 vs 36	Oceanospirillaceae	Neptunomonas
						Otu0127	13.8043	9.04896	1.71962	5.26219	1.42353e-07	6.58381e-07	ICN 30 vs 36	Colwelliaceae	Thalassomonas
						Otu0137	78.5667	7.73135	1.74469	4.43137	9.36354e-06	3.55334e-05	ICN 30 vs 36	Rhodobacteraceae	Nautella
						Otu0138	120.877	12.1952	1.78063	6.84882	7.44625e-12	9.18371e-11	ICN 30 vs 36	Proteobacteria_unclassified	Proteobacteria_unclassified
						Otu0143	3.29192	5.86112	2.59067	2.26239	0.023673	0.0449181	ICN 30 vs 36	Vibrionaceae	Photobacterium
						Otu0146	36.4026	10.451	2.39693	4.36019	1.29952e-05	4.57927e-05	ICN 30 vs 36	Vibrionaceae	Vibrionaceae_unclassified
						Otu0151	53.0673	6.73669	1.57717	4.27137	1.9428e-05	6.68684e-05	ICN 30 vs 36	Alteromonadales_unclassified	Alteromonadales_unclassified
						Otu0154	62.4001	11.2407	1.71223	6.56494	5.2054e-11	4.815e-10	ICN 30 vs 36	Rhodobacteraceae	Rhodobacteraceae_unclassified
						Otu0159	43.8572	7.46588	1.6219	4.60316	4.16138e-06	1.62075e-05	ICN 30 vs 36	Flavobacteriaceae	Tenacibaculum
						Otu0166	10.3125	8.63716	1.96218	4.40182	1.07346e-05	3.87495e-05	ICN 30 vs 36	Pseudoalteromonadaceae	Pseudoalteromonas
						Otu0170	75.2484	11.5133	1.71448	6.71532	1.87648e-11	1.85146e-10	ICN 30 vs 36	Rhodobacteraceae	Rhodobacteraceae_unclassified
						Otu0181	6.55288	7.96066	2.13285	3.7324	0.000189664	0.000610223	ICN 30 vs 36	Flavobacteriaceae	Tenacibaculum
						Otu0182	7.91541	8.21482	2.57018	3.1962	0.0013925	0.00349306	ICN 30 vs 36	Vibrionales_unclassified	Vibrionales_unclassified
						Otu0185	4.70523	7.43267	2.33575	3.18213	0.00146196	0.0035508	ICN 30 vs 36	Colwelliaceae	Thalassomonas
						Otu0233	45.0908	9.1993	1.74714	5.26536	1.39918e-07	6.58381e-07	ICN 30 vs 36	Rhodobacteraceae	Rhodobacteraceae_unclassified
						Otu0237	2.84731	5.76583	2.58054	2.23435	0.0254601	0.0471011	ICN 30 vs 36	Rhodobacteraceae	Rhodobacteraceae_unclassified
						Otu0244	2.34775	6.64243	2.47051	2.68869	0.0071733	0.0158455	ICN 30 vs 36	Rhodobacteraceae	Rhodobacteraceae_unclassified
						Otu0245	27.4364	10.0594	2.03841	4.93492	8.01847e-07	3.39067e-06	ICN 30 vs 36	Rhodobacteraceae	Rhodobacteraceae_unclassified
						Otu0248	31.7628	10.2759	1.76254	5.83016	5.5374e-09	3.90255e-08	ICN 30 vs 36	Rhodobacteraceae	Rhodobacteraceae_unclassified
						Otu0256	28.5203	10.1177	1.87972	5.38257	7.34289e-08	3.88124e-07	ICN 30 vs 36	BD-_unclassified	BD-_unclassified
						Otu0260	5.55411	7.74487	1.88833	4.10145	4.10571e-05	0.000138101	ICN 30 vs 36	Alteromonadales_unclassified	Alteromonadales_unclassified
						Otu0264	23.4024	9.82244	1.67013	5.88123	4.07238e-09	3.01356e-08	ICN 30 vs 36	Alteromonadaceae	BD-
						Otu0272	4.48862	7.47143	2.28058	3.2761	0.0010525	0.00288462	ICN 30 vs 36	Erythrobacteraceae	Erythromicrobium
						Otu0290	56.2728	11.0858	2.03174	5.45634	4.86046e-08	2.87739e-07	ICN 30 vs 36	Flavobacteriaceae	Tenacibaculum
						Otu0291	85.1594	26.3077	2.68027	9.81533	9.67185e-23	1.43143e-20	ICN 30 vs 36	Vibrionaceae	Vibrio
						Otu0325	17.7785	9.42862	1.73652	5.42961	5.64768e-08	3.21483e-07	ICN 30 vs 36	Rhodobacteraceae	Rhodobacteraceae_unclassified
						Otu0358	16.9192	9.36552	1.73607	5.39466	6.86553e-08	3.76333e-07	ICN 30 vs 36	Rhodobacteraceae	Thalassobius
						Otu0376	9.03939	8.42811	2.36138	3.56914	0.000358159	0.0010832	ICN 30 vs 36	Flavobacteriaceae	Flavobacteriaceae_unclassified
						Otu0390	4.86089	7.538	2.27307	3.31623	0.00091242	0.00254789	ICN 30 vs 36	Vibrionaceae	Aliivibrio
						Otu0442	4.87211	7.53309	2.11304	3.56505	0.000363786	0.0010832	ICN 30 vs 36	Oceanospirillaceae	Oleispira
						Otu0541	9.35059	8.45126	1.91588	4.41115	1.02821e-05	3.80438e-05	ICN 30 vs 36	Rhodobacteraceae	Rhodobacteraceae_unclassified
						Otu0629	10.4276	8.63355	2.37796	3.63065	0.000282709	0.000890233	ICN 30 vs 36	Flavobacteriaceae	Tenacibaculum
						Otu0670	4.29097	7.36211	2.25592	3.26346	0.00110059	0.0029087	ICN 30 vs 36	Flavobacteriaceae	Flavobacteriaceae_unclassified
						Otu0677	2.6496	5.93116	2.55905	2.31772	0.0204644	0.0398518	ICN 30 vs 36	Oceanospirillaceae	Amphritea
						Otu0699	1.76901	5.76677	2.36762	2.43569	0.0148635	0.0300171	ICN 30 vs 36	Propionibacteriaceae	Propionibacterium
						Otu0721	6.96875	6.96364	2.85925	2.43547	0.0148723	0.0300171	ICN 30 vs 36	mitochondria	mitochondria_unclassified
						Otu0776	4.40385	7.42897	2.29062	3.24321	0.00118189	0.00304792	ICN 30 vs 36	Vibrionaceae	Vibrio
						Otu0918	6.89398	7.998	3.00496	2.6616	0.00777691	0.0169262	ICN 30 vs 36	Alteromonadales_unclassified	Alteromonadales_unclassified
						Otu1013	2.28087	6.19125	2.33763	2.64851	0.00808463	0.017341	ICN 30 vs 36	Vibrionaceae	Vibrio
						Otu1093	2.62448	6.69142	2.53453	2.64011	0.00828797	0.0175057	ICN 30 vs 36	Campylobacteraceae	Arcobacter
						Otu1094	2.1194	6.34249	2.81646	2.25194	0.0243262	0.0455731	ICN 30 vs 36	Campylobacteraceae	Arcobacter
						Otu1161	4.97628	7.52175	2.5443	2.95632	0.00311337	0.00719966	ICN 30 vs 36	Vibrionaceae	Vibrionaceae_unclassified
						Otu0001	23985.2	-10.2489	1.12735	-9.09116	9.79838e-20	1.50895e-17	ICN 33 vs 36	Endozoicimonaceae	Endozoicimonaceae_unclassified
						Otu0002	9742.55	7.55277	1.12761	6.69802	2.11256e-11	1.08445e-09	ICN 33 vs 36	Vibrionaceae	Photobacterium
						Otu0007	178.342	7.32388	1.78716	4.09805	4.1664e-05	0.000320813	ICN 33 vs 36	Rhodobacteraceae	Rhodobacteraceae_unclassified
						Otu0008	2659.41	5.89566	1.14867	5.13257	2.85808e-07	4.40145e-06	ICN 33 vs 36	Rhodobacteraceae	Nautella
						Otu0011	348.655	8.2843	1.62685	5.09224	3.53859e-07	4.95402e-06	ICN 33 vs 36	Vibrionaceae	Vibrionaceae_unclassified
						Otu0013	7.67661	-5.64605	1.96694	-2.87048	0.00409853	0.0191265	ICN 33 vs 36	Endozoicimonaceae	Endozoicimonaceae_unclassified
						Otu0019	266.168	5.59219	1.97503	2.83145	0.0046338	0.0209884	ICN 33 vs 36	Rhodobacteraceae	Rhodobacteraceae_unclassified
						Otu0023	110.821	10.5553	1.63558	6.45356	1.09255e-10	4.20632e-09	ICN 33 vs 36	Vibrionaceae	Vibrio
						Otu0027	458.889	12.6037	1.67119	7.54176	4.63684e-14	3.57037e-12	ICN 33 vs 36	Vibrionaceae	Photobacterium
						Otu0029	195.251	6.28408	1.8076	3.47647	0.000508056	0.0028978	ICN 33 vs 36	Vibrionaceae	Vibrio
						Otu0033	14.232	4.96277	1.68584	2.9438	0.00324208	0.0172166	ICN 33 vs 36	Rhodobacteraceae	Ruegeria
						Otu0038	61.9868	-3.7128	1.31581	-2.82169	0.00477711	0.0210193	ICN 33 vs 36	Amoebophilaceae	SGUS
						Otu0042	7.67725	5.45548	1.89741	2.87523	0.00403735	0.0191265	ICN 33 vs 36	Clostridiales_unclassified	Clostridiales_unclassified
						Otu0049	60.6829	9.41669	1.65795	5.67973	1.34905e-08	2.30837e-07	ICN 33 vs 36	Campylobacteraceae	Arcobacter
						Otu0051	155.504	9.98578	1.65569	6.03118	1.62772e-09	3.58098e-08	ICN 33 vs 36	Rhodobacteraceae	Nautella
						Otu0052	62.2771	9.72239	1.66463	5.84057	5.20218e-09	1.00142e-07	ICN 33 vs 36	Campylobacteraceae	Arcobacter
						Otu0061	96.0057	10.3457	1.68569	6.13737	8.38982e-10	2.58406e-08	ICN 33 vs 36	Ferrimonadaceae	Ferrimonas
						Otu0071	29.8354	8.65534	1.73764	4.9811	6.32235e-07	6.95459e-06	ICN 33 vs 36	Vibrionaceae	Vibrio
						Otu0095	81.5672	10.112	1.65703	6.10246	1.04447e-09	2.6808e-08	ICN 33 vs 36	Proteobacteria_unclassified	Proteobacteria_unclassified
						Otu0096	51.6799	-2.5518	1.01979	-2.50229	0.0123393	0.0463475	ICN 33 vs 36	Alteromonadales_unclassified	Alteromonadales_unclassified
						Otu0110	6.14265	6.36057	2.38585	2.66595	0.0076771	0.0303147	ICN 33 vs 36	Vibrionaceae	Photobacterium
						Otu0113	23.7768	8.33283	1.6933	4.92105	8.60816e-07	8.83771e-06	ICN 33 vs 36	Campylobacteraceae	Arcobacter
						Otu0120	26.9489	8.50426	1.79238	4.74468	2.08834e-06	2.01003e-05	ICN 33 vs 36	Rhodobacteraceae	Rhodobacteraceae_unclassified
						Otu0123	10.8795	7.20134	1.81208	3.97408	7.06528e-05	0.000494569	ICN 33 vs 36	Oceanospirillaceae	Neptunomonas
						Otu0125	24.9865	-3.33861	1.16249	-2.87194	0.00407955	0.0191265	ICN 33 vs 36	Pirellulaceae	Pirellulaceae_unclassified
						Otu0129	9.40197	-4.5736	1.7843	-2.56324	0.01037	0.0399245	ICN 33 vs 36	Microbacteriaceae	Microbacterium
						Otu0132	9.55576	-4.05565	1.51048	-2.68501	0.00725279	0.0293929	ICN 33 vs 36	Cryomorphaceae	Fluviicola
						Otu0137	22.1129	8.2309	1.64735	4.99643	5.84005e-07	6.91821e-06	ICN 33 vs 36	Rhodobacteraceae	Nautella
						Otu0138	26.5157	8.49018	1.6882	5.02913	4.92713e-07	6.32315e-06	ICN 33 vs 36	Proteobacteria_unclassified	Proteobacteria_unclassified
						Otu0146	6.65916	6.46872	2.33995	2.76448	0.00570144	0.0243895	ICN 33 vs 36	Vibrionaceae	Vibrionaceae_unclassified
						Otu0151	13.7278	3.89664	1.57501	2.47405	0.0133593	0.048984	ICN 33 vs 36	Alteromonadales_unclassified	Alteromonadales_unclassified
						Otu0154	16.4057	7.79957	1.65295	4.71857	2.37503e-06	2.1515e-05	ICN 33 vs 36	Rhodobacteraceae	Rhodobacteraceae_unclassified
						Otu0209	6.86779	-4.75042	1.75436	-2.70778	0.00677358	0.0281928	ICN 33 vs 36	Comamonadaceae	Aquabacterium
						Otu0233	14.337	7.59654	1.74305	4.35818	1.31149e-05	0.000112205	ICN 33 vs 36	Rhodobacteraceae	Rhodobacteraceae_unclassified
						Otu0245	11.8045	7.31088	2.09024	3.49763	0.000469408	0.00278034	ICN 33 vs 36	Rhodobacteraceae	Rhodobacteraceae_unclassified
						Otu0248	12.7034	7.42485	1.79544	4.13538	3.54364e-05	0.000287221	ICN 33 vs 36	Rhodobacteraceae	Rhodobacteraceae_unclassified
						Otu0256	9.05349	6.93743	1.87429	3.70137	0.000214439	0.00143581	ICN 33 vs 36	BD-_unclassified	BD-_unclassified
						Otu0264	8.58876	6.86441	1.68994	4.06193	4.86689e-05	0.000356906	ICN 33 vs 36	Alteromonadaceae	BD-
						Otu0290	10.0684	7.08094	1.93622	3.65709	0.0002551	0.00157141	ICN 33 vs 36	Flavobacteriaceae	Tenacibaculum
						Otu0291	16.9981	7.82087	2.63759	2.96516	0.00302523	0.0166388	ICN 33 vs 36	Vibrionaceae	Vibrio
						Otu0358	6.66196	6.49668	1.76741	3.67582	0.000237086	0.0015213	ICN 33 vs 36	Rhodobacteraceae	Thalassobius
						Otu0541	3.98218	5.73736	1.9674	2.91621	0.00354313	0.018188	ICN 33 vs 36	Rhodobacteraceae	Rhodobacteraceae_unclassified
						Otu0263	6.36304	5.63593	1.4843	3.79703	0.000146443	0.0448115	Exposed Site Tahala 30 vs 36	Marinicellaceae	Marinicellaceae_unclassified
						Otu0267	6.63867	6.12684	1.42846	4.28912	1.79382e-05	0.0109782	Exposed Site Tahala 30 vs 36	Saprospiraceae	Saprospiraceae_unclassified
						Otu0267	5.56141	5.81713	1.38303	4.20608	2.59834e-05	0.0158239	Exposed Site Tahala 33 vs 36	Saprospiraceae	Saprospiraceae_unclassified

## Sheet: DESeq2_sites
Comparing sites						Comparing sites
	Number of DA OTUs	LFC > 0	LFC < 0			OTU	baseMean	log2FoldChange	lfcSE	stat	pvalue	padj	Comparison	Family	Genus
T30 ICN vs Al Fahal	78	45	33			Otu0001	25970.1	-5.87789	1.19941	-4.90064	9.55238e-07	1.19405e-05	T30 ICN vs Al Fahal	Endozoicimonaceae	Endozoicimonaceae_unclassified
T30 ICN vs Exposed Site Tahala	306	15	291			Otu0002	3255.04	4.6416	1.22959	3.7749	0.000160072	0.000889288	T30 ICN vs Al Fahal	Vibrionaceae	Photobacterium
T30 ICN vs Protected Site Tahala	72	40	32			Otu0003	370.121	3.53798	1.36484	2.59223	0.0095357	0.0234484	T30 ICN vs Al Fahal	Alteromonadaceae	Alteromonas
T30 Al Fahal vs Exposed Site Tahala	27	17	10			Otu0004	1123.63	5.14429	1.55436	3.30958	0.000934354	0.00389314	T30 ICN vs Al Fahal	Alteromonadaceae	Alteromonas
T30 Al Fahal vs Protected Site Tahala	18	5	13			Otu0005	230.671	10.7601	1.85055	5.8145	6.08144e-09	2.28054e-07	T30 ICN vs Al Fahal	Flavobacteriaceae	Flavobacteriaceae_unclassified
T30 Exposed Site Tahala vs Protected Site Tahala	3	3	0			Otu0010	110.001	9.23361	1.7828	5.17928	2.22744e-07	3.71241e-06	T30 ICN vs Al Fahal	Alteromonadaceae	Alteromonas
T33 ICN vs Al Fahal	34	11	23			Otu0011	149.27	10.1319	1.84986	5.47713	4.32286e-08	1.08072e-06	T30 ICN vs Al Fahal	Vibrionaceae	Vibrionaceae_unclassified
T33 ICN vs Exposed Site Tahala	78	31	47			Otu0016	292.01	11.1001	1.88405	5.89162	3.82439e-09	1.91219e-07	T30 ICN vs Al Fahal	Rhodobacteraceae	Rhodobacteraceae_unclassified
T33 ICN vs Protected Site Tahala	83	52	31			Otu0020	127.249	9.90056	1.96613	5.03556	4.76455e-07	6.49711e-06	T30 ICN vs Al Fahal	Saprospiraceae	Saprospira
T33 Al Fahal vs Exposed Site Tahala	39	23	16			Otu0022	11.6454	6.44858	1.83967	3.50529	0.000456111	0.00212764	T30 ICN vs Al Fahal	Alteromonadaceae	Marinobacter
T33 Al Fahal vs Protected Site Tahala	61	23	38			Otu0024	23.759	-6.55434	2.00471	-3.26947	0.00107748	0.00436817	T30 ICN vs Al Fahal	Bacteriovoracaceae	Bacteriovoracaceae_unclassified
T33 Exposed Site Tahala vs Protected Site Tahala	3	3	0			Otu0025	65.1794	5.80219	2.03847	2.84634	0.0044225	0.0141143	T30 ICN vs Al Fahal	Flavobacteriaceae	Tenacibaculum
T36 ICN vs Al Fahal	100	63	37			Otu0026	83.3032	8.83107	1.83224	4.81982	1.43688e-06	1.65794e-05	T30 ICN vs Al Fahal	Pseudoalteromonadaceae	Pseudoalteromonas
T36 ICN vs Exposed Site Tahala	135	100	35			Otu0029	46.7396	5.98215	1.86709	3.204	0.00135531	0.00521273	T30 ICN vs Al Fahal	Vibrionaceae	Vibrio
T36 ICN vs Protected Site Tahala	125	84	41			Otu0030	6.15319	5.50561	1.96211	2.80597	0.00501661	0.0150898	T30 ICN vs Al Fahal	Rhodobacteraceae	Anaerospora
T36 Al Fahal vs Exposed Site Tahala	73	39	34			Otu0036	78.0322	9.19441	2.06118	4.46075	8.16727e-06	7.20641e-05	T30 ICN vs Al Fahal	Vibrionaceae	Photobacterium
T36 Al Fahal vs Protected Site Tahala	65	23	42			Otu0037	15.3757	6.85081	1.84383	3.71553	0.000202777	0.00104885	T30 ICN vs Al Fahal	Flavobacteriaceae	Flavobacteriaceae_unclassified
T36 Exposed Site Tahala vs Protected Site Tahala	2	2	0			Otu0039	21.8526	6.02461	1.5859	3.79886	0.000145364	0.000838639	T30 ICN vs Al Fahal	Pseudoalteromonadaceae	Pseudoalteromonas
	1302					Otu0046	5.62604	5.39114	1.90022	2.83711	0.00455239	0.0142262	T30 ICN vs Al Fahal	GMDH_unclassified	GMDH_unclassified
						Otu0048	34.9441	8.03731	1.84866	4.34765	1.37604e-05	0.000112376	T30 ICN vs Al Fahal	Idiomarinaceae	Idiomarina
						Otu0050	6.55921	5.61629	2.11205	2.65916	0.00783352	0.0199157	T30 ICN vs Al Fahal	Alteromonadaceae	Glaciecola
						Otu0052	62.6957	5.76055	2.13129	2.70285	0.00687481	0.0188893	T30 ICN vs Al Fahal	Campylobacteraceae	Arcobacter
						Otu0057	3.91675	4.83911	1.9814	2.44226	0.0145955	0.0328796	T30 ICN vs Al Fahal	Flavobacteriaceae	Flavobacteriaceae_unclassified
						Otu0061	35.1941	8.04212	2.16374	3.71677	0.000201788	0.00104885	T30 ICN vs Al Fahal	Ferrimonadaceae	Ferrimonas
						Otu0062	21.358	7.32398	1.87424	3.90771	9.31733e-05	0.000635273	T30 ICN vs Al Fahal	Alteromonadaceae	Glaciecola
						Otu0064	83.0036	-10.3474	1.84753	-5.6007	2.13489e-08	6.40468e-07	T30 ICN vs Al Fahal	Flavobacteriaceae	Flavobacterium
						Otu0070	5.75006	-5.36132	2.27024	-2.36157	0.0181979	0.0389955	T30 ICN vs Al Fahal	Rhabdochlamydiaceae	Candidatus_Rhabdochlamydia
						Otu0071	8.307	5.95823	1.96608	3.03051	0.00244138	0.00851645	T30 ICN vs Al Fahal	Vibrionaceae	Vibrio
						Otu0073	9.10562	6.07547	1.98769	3.05654	0.00223904	0.00799659	T30 ICN vs Al Fahal	Oceanospirillaceae	Oceanospirillum
						Otu0076	57.2771	-9.81244	1.86299	-5.26705	1.38635e-07	2.5994e-06	T30 ICN vs Al Fahal	Cytophagaceae	Flectobacillus
						Otu0078	69.998	-10.1006	1.87552	-5.3855	7.22425e-08	1.54805e-06	T30 ICN vs Al Fahal	Oxalobacteraceae	Polynucleobacter
						Otu0080	17.0162	5.81246	1.8678	3.11193	0.00185869	0.00697009	T30 ICN vs Al Fahal	Oceanospirillaceae	Marinomonas
						Otu0081	69.5326	22.362	2.61336	8.55682	1.16022e-17	1.74032e-15	T30 ICN vs Al Fahal	Acidaminobacteraceae	Fusibacter
						Otu0084	3.76941	4.83842	1.92245	2.5168	0.0118428	0.0281971	T30 ICN vs Al Fahal	Hyphomonadaceae	Oceanicaulis
						Otu0087	46.5425	-6.56471	1.64358	-3.99415	6.49273e-05	0.000463766	T30 ICN vs Al Fahal	Propionibacteriaceae	Propionibacterium
						Otu0089	44.7722	-9.4564	1.84863	-5.11535	3.13167e-07	4.69751e-06	T30 ICN vs Al Fahal	Microbacteriaceae	Candidatus_Rhodoluna
						Otu0092	33.2669	7.96341	2.98738	2.66568	0.0076832	0.0199157	T30 ICN vs Al Fahal	Peptostreptococcaceae	Tepidibacter
						Otu0094	5.28934	5.2878	2.01843	2.61976	0.00879928	0.0219982	T30 ICN vs Al Fahal	Oceanospirillaceae	Oleibacter
						Otu0097	23.7819	7.47885	1.9684	3.79946	0.000145012	0.000838639	T30 ICN vs Al Fahal	BD-_unclassified	BD-_unclassified
						Otu0102	25.6769	7.59114	2.70618	2.80511	0.00502992	0.0150898	T30 ICN vs Al Fahal	Clostridiaceae	Clostridiaceae_unclassified
						Otu0109	4.98911	5.19902	1.94205	2.67708	0.00742673	0.019893	T30 ICN vs Al Fahal	Flammeovirgaceae	Roseivirga
						Otu0110	4.60695	5.08185	2.22442	2.28457	0.0223379	0.0446757	T30 ICN vs Al Fahal	Vibrionaceae	Photobacterium
						Otu0113	12.8316	6.58199	1.95757	3.36232	0.000772904	0.00331245	T30 ICN vs Al Fahal	Campylobacteraceae	Arcobacter
						Otu0114	37.1716	-9.18675	2.11666	-4.34022	1.42342e-05	0.000112376	T30 ICN vs Al Fahal	Flavobacteriaceae	Flavobacteriaceae_unclassified
						Otu0120	5.87703	5.44329	2.41429	2.25461	0.0241577	0.0470605	T30 ICN vs Al Fahal	Rhodobacteraceae	Rhodobacteraceae_unclassified
						Otu0121	18.836	7.13779	2.02893	3.51801	0.000434804	0.00210389	T30 ICN vs Al Fahal	Oceanospirillaceae	Oceanospirillaceae_unclassified
						Otu0122	26.8268	7.64988	2.35704	3.24555	0.00117224	0.00462728	T30 ICN vs Al Fahal	Oceanospirillaceae	Oceanospirillaceae_unclassified
						Otu0124	42.0063	-9.36426	2.42014	-3.86931	0.000109145	0.000682155	T30 ICN vs Al Fahal	Campylobacteraceae	Campylobacter
						Otu0125	24.5876	-8.59236	1.87586	-4.58049	4.6389e-06	4.88316e-05	T30 ICN vs Al Fahal	Pirellulaceae	Pirellulaceae_unclassified
						Otu0127	3.38507	4.62252	2.03325	2.27346	0.0229986	0.0453919	T30 ICN vs Al Fahal	Colwelliaceae	Thalassomonas
						Otu0129	27.2481	-8.74355	1.91336	-4.56975	4.88316e-06	4.88316e-05	T30 ICN vs Al Fahal	Microbacteriaceae	Microbacterium
						Otu0130	21.2056	-8.37784	2.15415	-3.88916	0.000100591	0.000656027	T30 ICN vs Al Fahal	Vibrionaceae	Photobacterium
						Otu0132	20.5549	-8.33965	1.97292	-4.22707	2.36757e-05	0.000177567	T30 ICN vs Al Fahal	Cryomorphaceae	Fluviicola
						Otu0146	15.4634	6.85527	2.68362	2.55448	0.0106346	0.0257288	T30 ICN vs Al Fahal	Vibrionaceae	Vibrionaceae_unclassified
						Otu0150	3.91641	4.88476	2.10853	2.31666	0.0205221	0.0433565	T30 ICN vs Al Fahal	Acidaminobacteraceae	Fusibacter
						Otu0161	22.1829	-8.44113	1.87893	-4.49251	7.03896e-06	6.59902e-05	T30 ICN vs Al Fahal	Micrococcaceae	Micrococcus
						Otu0162	3.07121	4.49491	1.95374	2.30067	0.02141	0.0441305	T30 ICN vs Al Fahal	BD-_unclassified	BD-_unclassified
						Otu0173	29.2856	-24.3471	2.98818	-8.14781	3.70584e-16	2.77938e-14	T30 ICN vs Al Fahal	Rhabdochlamydiaceae	Candidatus_Rhabdochlamydia
						Otu0178	12.2917	-7.59691	2.53445	-2.99746	0.00272239	0.00928088	T30 ICN vs Al Fahal	Methylobacteriaceae	Methylobacterium
						Otu0182	21.3187	7.31942	2.9878	2.44977	0.0142948	0.0328796	T30 ICN vs Al Fahal	Vibrionales_unclassified	Vibrionales_unclassified
						Otu0184	10.4205	-7.35341	2.11742	-3.47282	0.000515018	0.00227214	T30 ICN vs Al Fahal	SBRH_unclassified	SBRH_unclassified
						Otu0185	4.34045	4.99252	2.17114	2.29949	0.0214769	0.0441305	T30 ICN vs Al Fahal	Colwelliaceae	Thalassomonas
						Otu0189	9.3603	-7.20668	2.06	-3.49839	0.000468081	0.00212764	T30 ICN vs Al Fahal	Sphingomonadaceae	Sphingomonas
						Otu0227	4.50035	5.08119	2.1106	2.40746	0.0160637	0.0352901	T30 ICN vs Al Fahal	Alphaproteobacteria_unclassified	Alphaproteobacteria_unclassified
						Otu0231	5.17123	-5.93818	2.19441	-2.70606	0.00680876	0.0188893	T30 ICN vs Al Fahal	Corynebacteriaceae	Corynebacterium
						Otu0266	12.8992	-7.64868	2.14197	-3.57085	0.000355819	0.0017791	T30 ICN vs Al Fahal	Streptococcaceae	Streptococcus
						Otu0287	6.0735	-6.56451	2.34673	-2.7973	0.00515313	0.0151563	T30 ICN vs Al Fahal	Flavobacteriaceae	Flavobacteriaceae_unclassified
						Otu0294	6.40119	-6.6622	2.27833	-2.92416	0.00345384	0.0115128	T30 ICN vs Al Fahal	Rhizobiales_unclassified	Rhizobiales_unclassified
						Otu0296	7.11111	-6.79984	2.55663	-2.65969	0.00782136	0.0199157	T30 ICN vs Al Fahal	Oxalobacteraceae	Collimonas
						Otu0305	9.31691	-7.18995	2.99129	-2.40362	0.0162335	0.0352901	T30 ICN vs Al Fahal	Micrococcaceae	Microbispora
						Otu0310	7.39111	-6.85668	2.99255	-2.29125	0.0219488	0.0444908	T30 ICN vs Al Fahal	Bacillaceae	Bacillus
						Otu0318	8.11729	-6.9825	2.58575	-2.70038	0.00692607	0.0188893	T30 ICN vs Al Fahal	Micrococcaceae	Rothia
						Otu0335	6.05783	-6.57726	2.26508	-2.90376	0.00368713	0.0120232	T30 ICN vs Al Fahal	Flavobacteriaceae	Flavobacterium
						Otu0348	6.7217	-6.72327	2.99314	-2.24623	0.0246893	0.0474794	T30 ICN vs Al Fahal	Alicyclobacillaceae	Alicyclobacillus
						Otu0350	3.45316	-5.76677	2.33897	-2.46552	0.0136815	0.032066	T30 ICN vs Al Fahal	Comamonadaceae	Comamonadaceae_unclassified
						Otu0355	6.39177	-6.62647	2.13747	-3.10014	0.00193427	0.00707659	T30 ICN vs Al Fahal	Corynebacteriaceae	Corynebacterium
						Otu0426	4.75835	-6.2048	2.54293	-2.44003	0.0146862	0.0328796	T30 ICN vs Al Fahal	Procabacteriaceae	Procabacteriaceae_unclassified
						Otu0432	2.94684	-5.49577	1.99313	-2.75735	0.00582723	0.0168093	T30 ICN vs Al Fahal	ACK-M	ACK-M_unclassified
						Otu0003	2289.09	6.59771	1.35898	4.85489	1.20454e-06	1.55385e-05	T30 ICN vs Protected Site Tahala	Alteromonadaceae	Alteromonas
						Otu0004	1415.39	5.81857	1.51762	3.83402	0.000126065	0.000707062	T30 ICN vs Protected Site Tahala	Alteromonadaceae	Alteromonas
						Otu0005	552.178	12.3457	1.96677	6.27717	3.44787e-10	1.69279e-08	T30 ICN vs Protected Site Tahala	Flavobacteriaceae	Flavobacteriaceae_unclassified
						Otu0010	273.517	10.8784	1.73874	6.25652	3.93672e-10	1.69279e-08	T30 ICN vs Protected Site Tahala	Alteromonadaceae	Alteromonas
						Otu0011	132.804	10.2899	1.86253	5.52469	3.30061e-08	1.06445e-06	T30 ICN vs Protected Site Tahala	Vibrionaceae	Vibrionaceae_unclassified
						Otu0016	39.5765	8.54339	1.82406	4.68371	2.81729e-06	3.02859e-05	T30 ICN vs Protected Site Tahala	Rhodobacteraceae	Rhodobacteraceae_unclassified
						Otu0018	80.1051	4.4056	1.95498	2.25353	0.024226	0.0466441	T30 ICN vs Protected Site Tahala	Oceanospirillaceae	Oleibacter
						Otu0020	19.1416	7.49643	1.87945	3.98862	6.64591e-05	0.000408249	T30 ICN vs Protected Site Tahala	Saprospiraceae	Saprospira
						Otu0022	75.8352	9.48156	1.78121	5.32311	1.02006e-07	2.19312e-06	T30 ICN vs Protected Site Tahala	Alteromonadaceae	Marinobacter
						Otu0025	39.8981	5.4263	1.86074	2.91621	0.00354317	0.011148	T30 ICN vs Protected Site Tahala	Flavobacteriaceae	Tenacibaculum
						Otu0026	15.2572	6.68712	1.81187	3.69074	0.000223607	0.00110722	T30 ICN vs Protected Site Tahala	Pseudoalteromonadaceae	Pseudoalteromonas
						Otu0030	45.0287	8.72919	1.84011	4.74384	2.09705e-06	2.45927e-05	T30 ICN vs Protected Site Tahala	Rhodobacteraceae	Anaerospora
						Otu0032	50.3847	8.89116	2.20905	4.02489	5.7003e-05	0.00038702	T30 ICN vs Protected Site Tahala	Flavobacteriaceae	Flavobacteriaceae_unclassified
						Otu0034	58.9319	5.31596	1.94988	2.7263	0.00640483	0.0168617	T30 ICN vs Protected Site Tahala	Endozoicimonaceae	Endozoicimonaceae_unclassified
						Otu0037	20.6339	7.60316	1.83068	4.15318	3.27886e-05	0.000257718	T30 ICN vs Protected Site Tahala	Flavobacteriaceae	Flavobacteriaceae_unclassified
						Otu0039	12.9698	5.59558	1.54871	3.61306	0.000302609	0.00134609	T30 ICN vs Protected Site Tahala	Pseudoalteromonadaceae	Pseudoalteromonas
						Otu0046	14.7508	7.1176	1.92361	3.70013	0.000215491	0.00110722	T30 ICN vs Protected Site Tahala	GMDH_unclassified	GMDH_unclassified
						Otu0048	7.69647	6.17815	1.85274	3.3346	0.000854229	0.00344361	T30 ICN vs Protected Site Tahala	Idiomarinaceae	Idiomarina
						Otu0050	17.248	7.34404	1.81632	4.04337	5.26884e-05	0.0003776	T30 ICN vs Protected Site Tahala	Alteromonadaceae	Glaciecola
						Otu0053	11.4687	6.7553	2.33809	2.88924	0.00386171	0.011861	T30 ICN vs Protected Site Tahala	Rhodothermaceae	Rubricoccus
						Otu0057	15.2315	7.16601	2.12554	3.37139	0.00074791	0.00321601	T30 ICN vs Protected Site Tahala	Flavobacteriaceae	Flavobacteriaceae_unclassified
						Otu0062	7.72431	6.18258	2.22757	2.77548	0.00551207	0.0150191	T30 ICN vs Protected Site Tahala	Alteromonadaceae	Glaciecola
						Otu0064	66.2048	-9.69681	1.7934	-5.40695	6.41071e-08	1.65396e-06	T30 ICN vs Protected Site Tahala	Flavobacteriaceae	Flavobacterium
						Otu0065	13.8102	7.02304	1.92517	3.64801	0.000264284	0.00121759	T30 ICN vs Protected Site Tahala	Alteromonadaceae	Glaciecola
						Otu0066	14.1784	7.06069	2.26457	3.11789	0.00182148	0.00618344	T30 ICN vs Protected Site Tahala	Rhodobacteraceae	Rhodobacteraceae_unclassified
						Otu0070	4.3339	-5.77022	2.49245	-2.31507	0.0206089	0.0415398	T30 ICN vs Protected Site Tahala	Rhabdochlamydiaceae	Candidatus_Rhabdochlamydia
						Otu0073	8.12045	6.25638	2.21687	2.82217	0.00476996	0.0136375	T30 ICN vs Protected Site Tahala	Oceanospirillaceae	Oceanospirillum
						Otu0074	7.02907	6.04938	1.85582	3.25968	0.0011154	0.00423195	T30 ICN vs Protected Site Tahala	Hyphomonadaceae	Hyphomonadaceae_unclassified
						Otu0076	45.685	-9.16183	1.80966	-5.06273	4.13292e-07	6.66434e-06	T30 ICN vs Protected Site Tahala	Cytophagaceae	Flectobacillus
						Otu0077	19.6679	7.53475	1.91208	3.9406	8.12773e-05	0.000476581	T30 ICN vs Protected Site Tahala	BD-_unclassified	BD-_unclassified
						Otu0078	55.8314	-9.44993	1.82234	-5.18559	2.15329e-07	3.96821e-06	T30 ICN vs Protected Site Tahala	Oxalobacteraceae	Polynucleobacter
						Otu0079	132.872	-8.62643	2.95427	-2.91999	0.00350042	0.011148	T30 ICN vs Protected Site Tahala	Rhodobacteraceae	Rhodobacteraceae_unclassified
						Otu0080	5.73986	4.54963	1.98984	2.28643	0.0222292	0.043448	T30 ICN vs Protected Site Tahala	Oceanospirillaceae	Marinomonas
						Otu0084	4.50023	5.40598	2.06324	2.62015	0.00878919	0.021804	T30 ICN vs Protected Site Tahala	Hyphomonadaceae	Oceanicaulis
						Otu0087	38.3687	-4.56254	1.45958	-3.12592	0.00177248	0.00617973	T30 ICN vs Protected Site Tahala	Propionibacteriaceae	Propionibacterium
						Otu0089	35.7109	-8.80573	1.79518	-4.90519	9.33349e-07	1.3378e-05	T30 ICN vs Protected Site Tahala	Microbacteriaceae	Candidatus_Rhodoluna
						Otu0091	7.60946	6.16197	1.93411	3.18594	0.00144285	0.0051702	T30 ICN vs Protected Site Tahala	BD-_unclassified	BD-_unclassified
						Otu0098	6.35006	5.902	2.05678	2.86953	0.00411085	0.0123325	T30 ICN vs Protected Site Tahala	Hyphomonadaceae	Hyphomonas
						Otu0100	15.0315	7.14648	2.57903	2.771	0.0055885	0.0150191	T30 ICN vs Protected Site Tahala	Leptospiraceae	Leptospira
						Otu0104	2.57655	4.597	2.0861	2.20363	0.0275502	0.0493608	T30 ICN vs Protected Site Tahala	Rhodobacteraceae	Marivita
						Otu0108	5.81374	5.77498	2.493	2.31648	0.0205322	0.0415398	T30 ICN vs Protected Site Tahala	Cryomorphaceae	Cryomorphaceae_unclassified
						Otu0111	5.52811	5.69867	1.85669	3.06925	0.00214593	0.00709809	T30 ICN vs Protected Site Tahala	Flavobacteriaceae	Winogradskyella
						Otu0114	29.6486	-8.53621	2.05934	-4.14512	3.39629e-05	0.000257718	T30 ICN vs Protected Site Tahala	Flavobacteriaceae	Flavobacteriaceae_unclassified
						Otu0115	10.6365	6.64602	2.5636	2.59246	0.00952927	0.0231939	T30 ICN vs Protected Site Tahala	Rhodobacteraceae	Roseivivax
						Otu0124	33.5048	-8.71396	2.35737	-3.69648	0.000218612	0.00110722	T30 ICN vs Protected Site Tahala	Campylobacteraceae	Campylobacter
						Otu0125	19.6114	-7.94176	1.8243	-4.35331	1.34097e-05	0.000127698	T30 ICN vs Protected Site Tahala	Pirellulaceae	Pirellulaceae_unclassified
						Otu0128	4.16127	5.29234	2.04735	2.58497	0.0097388	0.0232649	T30 ICN vs Protected Site Tahala	Flavobacteriaceae	Winogradskyella
						Otu0129	21.828	-7.68137	1.76742	-4.34609	1.38587e-05	0.000127698	T30 ICN vs Protected Site Tahala	Microbacteriaceae	Microbacterium
						Otu0130	16.9138	-7.72738	2.0989	-3.68163	0.000231744	0.00110722	T30 ICN vs Protected Site Tahala	Vibrionaceae	Photobacterium
						Otu0132	16.3949	-7.68948	1.92365	-3.99735	6.40563e-05	0.000408249	T30 ICN vs Protected Site Tahala	Cryomorphaceae	Fluviicola
						Otu0140	5.0101	5.56001	2.25385	2.4669	0.0136288	0.029015	T30 ICN vs Protected Site Tahala	Alteromonadaceae	Alteromonas
						Otu0158	3.16762	4.89189	1.92937	2.53548	0.0112294	0.0258676	T30 ICN vs Protected Site Tahala	Halomonadaceae	Halomonas
						Otu0161	17.6934	-7.79034	1.82775	-4.26226	2.02371e-05	0.000174039	T30 ICN vs Protected Site Tahala	Micrococcaceae	Micrococcus
						Otu0167	4.71851	5.4714	2.22008	2.4645	0.0137203	0.029015	T30 ICN vs Protected Site Tahala	Flammeovirgaceae	Roseivirga
						Otu0173	23.3586	-23.2482	2.98818	-7.78005	7.24964e-15	9.35203e-13	T30 ICN vs Protected Site Tahala	Rhabdochlamydiaceae	Candidatus_Rhabdochlamydia
						Otu0178	9.80406	-6.94699	2.467	-2.81597	0.00486299	0.0136375	T30 ICN vs Protected Site Tahala	Methylobacteriaceae	Methylobacterium
						Otu0184	8.31151	-6.70296	2.06473	-3.24642	0.00116867	0.00430739	T30 ICN vs Protected Site Tahala	SBRH_unclassified	SBRH_unclassified
						Otu0189	7.4659	-6.55668	2.00688	-3.26711	0.00108652	0.00423195	T30 ICN vs Protected Site Tahala	Sphingomonadaceae	Sphingomonas
						Otu0207	7.05322	-6.46884	2.80643	-2.30501	0.0211663	0.0420069	T30 ICN vs Protected Site Tahala	Propionibacteriaceae	Propionibacterium
						Otu0231	4.19552	-5.24831	2.1533	-2.43733	0.0147963	0.0307859	T30 ICN vs Protected Site Tahala	Corynebacteriaceae	Corynebacterium
						Otu0266	10.2886	-6.99749	2.08851	-3.35047	0.000806753	0.00335713	T30 ICN vs Protected Site Tahala	Streptococcaceae	Streptococcus
						Otu0287	4.84431	-5.91366	2.29343	-2.57853	0.0099223	0.0232723	T30 ICN vs Protected Site Tahala	Flavobacteriaceae	Flavobacteriaceae_unclassified
						Otu0294	5.10568	-6.0125	2.2232	-2.70444	0.00684205	0.0176525	T30 ICN vs Protected Site Tahala	Rhizobiales_unclassified	Rhizobiales_unclassified
						Otu0296	5.67192	-6.14949	2.49461	-2.46511	0.0136971	0.029015	T30 ICN vs Protected Site Tahala	Oxalobacteraceae	Collimonas
						Otu0310	5.89525	-6.2064	2.79846	-2.21779	0.0265691	0.0482734	T30 ICN vs Protected Site Tahala	Bacillaceae	Bacillus
						Otu0318	6.47446	-6.33171	2.5228	-2.50979	0.0120803	0.0273397	T30 ICN vs Protected Site Tahala	Micrococcaceae	Rothia
						Otu0335	4.83181	-5.92724	2.2104	-2.68153	0.00732867	0.0185372	T30 ICN vs Protected Site Tahala	Flavobacteriaceae	Flavobacterium
						Otu0348	5.36132	-6.07365	2.73539	-2.2204	0.0263918	0.0482734	T30 ICN vs Protected Site Tahala	Alicyclobacillaceae	Alicyclobacillus
						Otu0350	2.75429	-5.11674	2.29471	-2.2298	0.0257608	0.0481614	T30 ICN vs Protected Site Tahala	Comamonadaceae	Comamonadaceae_unclassified
						Otu0355	5.09816	-5.97486	2.0892	-2.85988	0.00423807	0.0124252	T30 ICN vs Protected Site Tahala	Corynebacteriaceae	Corynebacterium
						Otu0426	3.79533	-5.55369	2.48675	-2.23331	0.0255285	0.0481614	T30 ICN vs Protected Site Tahala	Procabacteriaceae	Procabacteriaceae_unclassified
						Otu0432	2.35044	-4.84396	1.96113	-2.46999	0.0135118	0.029015	T30 ICN vs Protected Site Tahala	ACK-M	ACK-M_unclassified
						Otu0001	318933	-14.594	1.79146	-8.14643	3.74817e-16	2.56749e-14	T30 ICN vs Exposed Site Tahala	Endozoicimonaceae	Endozoicimonaceae_unclassified
						Otu0004	1297.83	4.10104	1.63195	2.51296	0.0119722	0.0307535	T30 ICN vs Exposed Site Tahala	Alteromonadaceae	Alteromonas
						Otu0005	182.454	8.22856	1.94527	4.23003	2.33658e-05	0.000322254	T30 ICN vs Exposed Site Tahala	Flavobacteriaceae	Flavobacteriaceae_unclassified
						Otu0010	209.837	7.76129	2.10127	3.69361	0.000221089	0.00187396	T30 ICN vs Exposed Site Tahala	Alteromonadaceae	Alteromonas
						Otu0011	76.344	6.97765	1.90029	3.67189	0.000240768	0.00197853	T30 ICN vs Exposed Site Tahala	Vibrionaceae	Vibrionaceae_unclassified
						Otu0012	459.356	-3.84358	1.67138	-2.29964	0.0214685	0.0434992	T30 ICN vs Exposed Site Tahala	Flavobacteriaceae	Tenacibaculum
						Otu0016	48.4143	6.27038	2.37941	2.63527	0.00840703	0.0253727	T30 ICN vs Exposed Site Tahala	Rhodobacteraceae	Rhodobacteraceae_unclassified
						Otu0020	22.2869	5.19344	1.9604	2.64917	0.00806908	0.0253727	T30 ICN vs Exposed Site Tahala	Saprospiraceae	Saprospira
						Otu0022	98.6273	7.33755	1.97079	3.72315	0.000196756	0.00175798	T30 ICN vs Exposed Site Tahala	Alteromonadaceae	Marinobacter
						Otu0030	19.3343	4.99138	1.93079	2.58514	0.00973382	0.0275904	T30 ICN vs Exposed Site Tahala	Rhodobacteraceae	Anaerospora
						Otu0032	11.1782	4.19847	1.94298	2.16084	0.0307076	0.0479212	T30 ICN vs Exposed Site Tahala	Flavobacteriaceae	Flavobacteriaceae_unclassified
						Otu0033	1349.25	-9.34097	2.4246	-3.85259	0.000116876	0.00123169	T30 ICN vs Exposed Site Tahala	Rhodobacteraceae	Ruegeria
						Otu0035	3.48887	-7.80621	3.01375	-2.5902	0.00959194	0.0275685	T30 ICN vs Exposed Site Tahala	Flavobacteriaceae	Flavobacteriaceae_unclassified
						Otu0037	14.57	4.56817	2.04517	2.23365	0.0255064	0.0463255	T30 ICN vs Exposed Site Tahala	Flavobacteriaceae	Flavobacteriaceae_unclassified
						Otu0039	26.8045	4.49161	1.75074	2.56556	0.010301	0.0284143	T30 ICN vs Exposed Site Tahala	Pseudoalteromonadaceae	Pseudoalteromonas
						Otu0041	30.9215	-10.4286	2.90052	-3.59542	0.000323863	0.00244407	T30 ICN vs Exposed Site Tahala	Phyllobacteriaceae	Phyllobacteriaceae_unclassified
						Otu0050	20.0554	5.00638	2.27795	2.19776	0.0279663	0.0463255	T30 ICN vs Exposed Site Tahala	Alteromonadaceae	Glaciecola
						Otu0057	18.0541	4.86475	2.16822	2.24366	0.0248544	0.0463255	T30 ICN vs Exposed Site Tahala	Flavobacteriaceae	Flavobacteriaceae_unclassified
						Otu0064	641.864	-14.9228	2.0052	-7.44206	9.91245e-14	5.82002e-12	T30 ICN vs Exposed Site Tahala	Flavobacteriaceae	Flavobacterium
						Otu0065	12.2352	4.31973	2.01032	2.14878	0.0316522	0.0489063	T30 ICN vs Exposed Site Tahala	Alteromonadaceae	Glaciecola
						Otu0067	29.4403	-8.64654	2.56838	-3.36654	0.000761183	0.00424474	T30 ICN vs Exposed Site Tahala	Flavobacteriaceae	Tenacibaculum
						Otu0068	7.79567	-8.67186	3.0048	-2.886	0.00390172	0.016532	T30 ICN vs Exposed Site Tahala	C	C_unclassified
						Otu0070	107.415	-28.0879	2.6878	-10.4502	1.4625e-25	3.00545e-23	T30 ICN vs Exposed Site Tahala	Rhabdochlamydiaceae	Candidatus_Rhabdochlamydia
						Otu0076	413.377	-14.2834	2.00501	-7.12383	1.04969e-12	4.79361e-11	T30 ICN vs Exposed Site Tahala	Cytophagaceae	Flectobacillus
						Otu0077	18.933	4.9465	2.04332	2.42081	0.0154859	0.0365634	T30 ICN vs Exposed Site Tahala	BD-_unclassified	BD-_unclassified
						Otu0078	696.456	-15.0374	2.0683	-7.27042	3.58378e-13	1.84117e-11	T30 ICN vs Exposed Site Tahala	Oxalobacteraceae	Polynucleobacter
						Otu0079	13.8352	-10.1194	3.00688	-3.36542	0.00076426	0.00424474	T30 ICN vs Exposed Site Tahala	Rhodobacteraceae	Rhodobacteraceae_unclassified
						Otu0087	411.039	-7.88636	1.74958	-4.50756	6.55766e-06	0.000115109	T30 ICN vs Exposed Site Tahala	Propionibacteriaceae	Propionibacterium
						Otu0089	334.155	-13.9744	1.9996	-6.98861	2.77629e-12	1.14106e-10	T30 ICN vs Exposed Site Tahala	Microbacteriaceae	Candidatus_Rhodoluna
						Otu0114	371.964	-14.1216	2.28529	-6.17934	6.43685e-10	1.88967e-08	T30 ICN vs Exposed Site Tahala	Flavobacteriaceae	Flavobacteriaceae_unclassified
						Otu0118	26.6018	-26.1943	2.77997	-9.42249	4.40525e-21	6.03519e-19	T30 ICN vs Exposed Site Tahala	Desulfovibrionaceae	Desulfovibrionaceae_unclassified
						Otu0119	1.86514	-7.1747	3.01984	-2.37586	0.0175083	0.0386876	T30 ICN vs Exposed Site Tahala	Rhodobacteraceae	Rhodobacteraceae_unclassified
						Otu0124	469.442	-30	2.58841	-11.5901	4.62346e-31	1.90024e-28	T30 ICN vs Exposed Site Tahala	Campylobacteraceae	Campylobacter
						Otu0125	155.513	-12.8617	1.99265	-6.45457	1.08528e-10	3.7171e-09	T30 ICN vs Exposed Site Tahala	Pirellulaceae	Pirellulaceae_unclassified
						Otu0129	137.103	-12.1727	1.90248	-6.39837	1.57048e-10	4.96513e-09	T30 ICN vs Exposed Site Tahala	Microbacteriaceae	Microbacterium
						Otu0130	142.484	-12.7216	2.25935	-5.63065	1.79534e-08	4.61179e-07	T30 ICN vs Exposed Site Tahala	Vibrionaceae	Photobacterium
						Otu0131	89.1646	-5.91099	2.38878	-2.47448	0.0133431	0.0331172	T30 ICN vs Exposed Site Tahala	Rhizobiales_unclassified	Rhizobiales_unclassified
						Otu0132	70.6756	-11.7508	1.97948	-5.93628	2.91563e-09	7.98884e-08	T30 ICN vs Exposed Site Tahala	Cryomorphaceae	Fluviicola
						Otu0151	46.6425	-6.25785	2.09763	-2.98329	0.00285165	0.0130226	T30 ICN vs Exposed Site Tahala	Alteromonadales_unclassified	Alteromonadales_unclassified
						Otu0155	1.96249	-7.20139	3.01953	-2.38494	0.0170819	0.0383642	T30 ICN vs Exposed Site Tahala	Comamonadaceae	Comamonadaceae_unclassified
						Otu0161	198.972	-12.6857	1.94568	-6.51993	7.03399e-11	2.62816e-09	T30 ICN vs Exposed Site Tahala	Micrococcaceae	Micrococcus
						Otu0173	132.51	-12.601	2.97999	-4.22853	2.35222e-05	0.000322254	T30 ICN vs Exposed Site Tahala	Rhabdochlamydiaceae	Candidatus_Rhabdochlamydia
						Otu0178	49.0849	-11.219	2.57243	-4.36125	1.29319e-05	0.000196852	T30 ICN vs Exposed Site Tahala	Methylobacteriaceae	Methylobacterium
						Otu0184	78.0558	-11.839	2.24344	-5.27715	1.31205e-07	3.17207e-06	T30 ICN vs Exposed Site Tahala	SBRH_unclassified	SBRH_unclassified
						Otu0189	46.1859	-11.1382	2.13737	-5.21115	1.87672e-07	4.28517e-06	T30 ICN vs Exposed Site Tahala	Sphingomonadaceae	Sphingomonas
						Otu0190	34.8469	-10.6916	2.92091	-3.66036	0.000251862	0.00199068	T30 ICN vs Exposed Site Tahala	Endozoicimonaceae	Endozoicimonaceae_unclassified
						Otu0207	49.486	-8.01453	2.66631	-3.00585	0.00264837	0.0125172	T30 ICN vs Exposed Site Tahala	Propionibacteriaceae	Propionibacterium
						Otu0209	35.0348	-10.6072	2.90205	-3.65506	0.000257118	0.00199388	T30 ICN vs Exposed Site Tahala	Comamonadaceae	Aquabacterium
						Otu0217	43.2184	-26.8333	2.99663	-8.95448	3.41355e-19	3.50742e-17	T30 ICN vs Exposed Site Tahala	Hyphomicrobiaceae	Hyphomicrobium
						Otu0222	7.40469	-8.7032	2.78378	-3.1264	0.0017696	0.00876271	T30 ICN vs Exposed Site Tahala	Cryomorphaceae	Fluviicola
						Otu0224	2.51337	-7.44941	3.01687	-2.46925	0.0135397	0.0331172	T30 ICN vs Exposed Site Tahala	Rickettsiales_unclassified	Rickettsiales_unclassified
						Otu0229	25.1337	-10.2143	2.99353	-3.41212	0.000644589	0.00395412	T30 ICN vs Exposed Site Tahala	Pasteurellaceae	Haemophilus
						Otu0231	52.8586	-11.2244	2.49303	-4.50232	6.72171e-06	0.000115109	T30 ICN vs Exposed Site Tahala	Corynebacteriaceae	Corynebacterium
						Otu0235	0.764063	-6.33408	3.03303	-2.08837	0.0367644	0.0494643	T30 ICN vs Exposed Site Tahala	Rhizobiales_unclassified	Rhizobiales_unclassified
						Otu0247	9.10455	-24.7747	3.01316	-8.22217	1.99862e-16	1.64286e-14	T30 ICN vs Exposed Site Tahala	Sphingomonadaceae	Sphingomonas
						Otu0261	6.63507	-7.45865	2.39777	-3.11067	0.00186665	0.00913326	T30 ICN vs Exposed Site Tahala	Sphingomonadaceae	Sphingomonas
						Otu0266	168.592	-11.1422	2.15128	-5.17933	2.22682e-07	4.81695e-06	T30 ICN vs Exposed Site Tahala	Streptococcaceae	Streptococcus
						Otu0270	67.1317	-11.0382	2.75474	-4.00697	6.15032e-05	0.00072179	T30 ICN vs Exposed Site Tahala	Rhodobacteraceae	Rhodobacteraceae_unclassified
						Otu0278	50.9739	-11.1742	2.98557	-3.74274	0.000182028	0.00166514	T30 ICN vs Exposed Site Tahala	Rhodobacteraceae	Rhodobacteraceae_unclassified
						Otu0286	22.6042	-9.90899	2.6816	-3.69518	0.000219732	0.00187396	T30 ICN vs Exposed Site Tahala	Moraxellaceae	Enhydrobacter
						Otu0287	56.6641	-11.3592	2.49071	-4.56064	5.09985e-06	9.52744e-05	T30 ICN vs Exposed Site Tahala	Flavobacteriaceae	Flavobacteriaceae_unclassified
						Otu0288	0.872219	-6.40817	3.03156	-2.11382	0.0345305	0.0494643	T30 ICN vs Exposed Site Tahala	Flavobacteriaceae	Tenacibaculum
						Otu0294	30.8262	-10.5513	2.35047	-4.48901	7.15547e-06	0.000117636	T30 ICN vs Exposed Site Tahala	Rhizobiales_unclassified	Rhizobiales_unclassified
						Otu0296	70.563	-11.6968	2.70258	-4.32801	1.50461e-05	0.000220856	T30 ICN vs Exposed Site Tahala	Oxalobacteraceae	Collimonas
						Otu0298	7.45747	-8.71019	3.00441	-2.89913	0.00374197	0.0160203	T30 ICN vs Exposed Site Tahala	Comamonadaceae	Comamonas
						Otu0304	18.995	-9.46057	2.83568	-3.33627	0.000849112	0.00453227	T30 ICN vs Exposed Site Tahala	Enterobacteriaceae	Yersinia
						Otu0305	60.4702	-11.4366	2.98412	-3.83249	0.000126853	0.00130341	T30 ICN vs Exposed Site Tahala	Micrococcaceae	Microbispora
						Otu0310	1.16304	-6.68276	3.02668	-2.20795	0.0272477	0.0463255	T30 ICN vs Exposed Site Tahala	Bacillaceae	Bacillus
						Otu0315	81.5159	-11.3217	2.83184	-3.99798	6.38846e-05	0.00072179	T30 ICN vs Exposed Site Tahala	Moraxellaceae	Acinetobacter
						Otu0318	93.9489	-10.972	2.6057	-4.21076	2.54518e-05	0.000337441	T30 ICN vs Exposed Site Tahala	Micrococcaceae	Rothia
						Otu0321	6.6015	-7.41217	2.88586	-2.56845	0.0102155	0.0284143	T30 ICN vs Exposed Site Tahala	Alphaproteobacteria_unclassified	Alphaproteobacteria_unclassified
						Otu0335	27.984	-10.4032	2.33323	-4.45872	8.24497e-06	0.000130334	T30 ICN vs Exposed Site Tahala	Flavobacteriaceae	Flavobacterium
						Otu0338	18.6141	-9.81973	2.99644	-3.27713	0.00104868	0.00552571	T30 ICN vs Exposed Site Tahala	Bacteroidetes_unclassified	Bacteroidetes_unclassified
						Otu0345	30.4583	-10.5093	2.84732	-3.69095	0.000223416	0.00187396	T30 ICN vs Exposed Site Tahala	Methylophilaceae	Methylotenera
						Otu0348	4.91367	-8.18794	3.01064	-2.71966	0.00653486	0.0231537	T30 ICN vs Exposed Site Tahala	Alicyclobacillaceae	Alicyclobacillus
						Otu0349	3.52988	-7.79836	3.01381	-2.58754	0.0096663	0.0275892	T30 ICN vs Exposed Site Tahala	Flavobacteriaceae	Flavobacterium
						Otu0350	12.4183	-8.86255	2.3533	-3.76602	0.000165873	0.00162319	T30 ICN vs Exposed Site Tahala	Comamonadaceae	Comamonadaceae_unclassified
						Otu0355	79.9029	-11.8481	2.32877	-5.0877	3.62426e-07	7.44786e-06	T30 ICN vs Exposed Site Tahala	Corynebacteriaceae	Corynebacterium
						Otu0362	25.4245	-10.2318	2.9468	-3.4722	0.000516221	0.00335973	T30 ICN vs Exposed Site Tahala	Brevibacteriaceae	Brevibacterium
						Otu0368	20.0485	-8.74608	2.90982	-3.00571	0.00264963	0.0125172	T30 ICN vs Exposed Site Tahala	Rhodocyclaceae	C
						Otu0379	29.9065	-10.3774	2.99182	-3.4686	0.000523169	0.00335973	T30 ICN vs Exposed Site Tahala	Hyphomicrobiaceae	Devosia
						Otu0386	20.4099	-8.98256	3.00189	-2.9923	0.00276886	0.0127865	T30 ICN vs Exposed Site Tahala	Peptostreptococcaceae	Peptostreptococcaceae_unclassified
						Otu0387	22.7387	-9.97629	2.89102	-3.45078	0.000558967	0.00348084	T30 ICN vs Exposed Site Tahala	Comamonadaceae	Delftia
						Otu0391	57.4867	-11.3563	2.98454	-3.80506	0.00014177	0.00142116	T30 ICN vs Exposed Site Tahala	Rhodobacteraceae	Dinoroseobacter
						Otu0396	2.18055	-7.3099	3.01831	-2.42185	0.0154416	0.0365634	T30 ICN vs Exposed Site Tahala	Simkaniaceae	Simkaniaceae_unclassified
						Otu0411	0.908603	-6.44793	3.0308	-2.12747	0.0333811	0.0494643	T30 ICN vs Exposed Site Tahala	Vibrionaceae	Vibrionaceae_unclassified
						Otu0422	2.97136	-7.60879	3.01538	-2.52332	0.0116251	0.0304326	T30 ICN vs Exposed Site Tahala	Oxalobacteraceae	Ralstonia
						Otu0423	15.4282	-8.5372	2.61157	-3.26899	0.00107931	0.00561515	T30 ICN vs Exposed Site Tahala	Bradyrhizobiaceae	Bosea
						Otu0426	56.1041	-11.3185	2.70858	-4.17876	2.93098e-05	0.000376447	T30 ICN vs Exposed Site Tahala	Procabacteriaceae	Procabacteriaceae_unclassified
						Otu0431	14.9854	-8.40858	3.00776	-2.79563	0.00517993	0.0191797	T30 ICN vs Exposed Site Tahala	Bacillaceae	Bacillus
						Otu0432	30.5814	-10.3266	2.15726	-4.7869	1.6938e-06	3.31501e-05	T30 ICN vs Exposed Site Tahala	ACK-M	ACK-M_unclassified
						Otu0441	4.42672	-8.04617	3.01203	-2.67135	0.00755474	0.0253727	T30 ICN vs Exposed Site Tahala	Bacteroidetes_unclassified	Bacteroidetes_unclassified
						Otu0444	83.2097	-11.9102	2.98205	-3.99396	6.49787e-05	0.00072179	T30 ICN vs Exposed Site Tahala	Cryomorphaceae	Fluviicola
						Otu0453	19.1016	-7.93395	3.0128	-2.63342	0.00845307	0.0253727	T30 ICN vs Exposed Site Tahala	Sphingomonadaceae	Sphingomonas
						Otu0457	10.612	-8.43733	3.00741	-2.80551	0.00502372	0.0187704	T30 ICN vs Exposed Site Tahala	Cytophagales_unclassified	Cytophagales_unclassified
						Otu0473	10.9942	-9.11399	2.22137	-4.10287	4.08055e-05	0.000508214	T30 ICN vs Exposed Site Tahala	Cyanobacteria_unclassified	Cyanobacteria_unclassified
						Otu0480	6.70231	-8.45263	3.00723	-2.81077	0.00494234	0.0186358	T30 ICN vs Exposed Site Tahala	Pasteurellaceae	Haemophilus
						Otu0484	1.57995	-7.00959	3.02189	-2.3196	0.0203625	0.0422675	T30 ICN vs Exposed Site Tahala	Bacteroidetes_unclassified	Bacteroidetes_unclassified
						Otu0486	3.94525	-7.94963	3.01268	-2.63872	0.00832196	0.0253727	T30 ICN vs Exposed Site Tahala	Paenibacillaceae	Ammoniphilus
						Otu0491	1.07926	-6.62903	3.02757	-2.18956	0.0285564	0.0463255	T30 ICN vs Exposed Site Tahala	Cyanobacteria_unclassified	Cyanobacteria_unclassified
						Otu0493	7.55127	-8.62299	3.00532	-2.86925	0.00411453	0.0172558	T30 ICN vs Exposed Site Tahala	Proteobacteria_unclassified	Proteobacteria_unclassified
						Otu0504	13.1304	-8.93505	2.8463	-3.13918	0.00169422	0.00849174	T30 ICN vs Exposed Site Tahala	Corynebacteriaceae	Corynebacterium
						Otu0507	2.54688	-7.44337	3.01693	-2.4672	0.0136175	0.0331172	T30 ICN vs Exposed Site Tahala	Chitinophagaceae	Chitinophagaceae_unclassified
						Otu0510	5.27553	-8.25951	2.80892	-2.94046	0.00327725	0.0148017	T30 ICN vs Exposed Site Tahala	Gammaproteobacteria_unclassified	Gammaproteobacteria_unclassified
						Otu0512	2.93818	-7.63683	3.01514	-2.53283	0.0113146	0.0304326	T30 ICN vs Exposed Site Tahala	Bacteroidetes_unclassified	Bacteroidetes_unclassified
						Otu0515	1.27344	-6.72604	3.02599	-2.22276	0.0262321	0.0463255	T30 ICN vs Exposed Site Tahala	Campylobacterales_unclassified	Campylobacterales_unclassified
						Otu0519	1.22199	-6.76005	3.02546	-2.23439	0.0254575	0.0463255	T30 ICN vs Exposed Site Tahala	Oxalobacteraceae	Oxalobacteraceae_unclassified
						Otu0526	3.43477	-6.67467	2.86008	-2.33374	0.0196095	0.0421621	T30 ICN vs Exposed Site Tahala	Hyphomicrobiaceae	Hyphomicrobium
						Otu0531	1.11536	-6.66214	3.02702	-2.20089	0.0277437	0.0463255	T30 ICN vs Exposed Site Tahala	Bacteria_unclassified	Bacteria_unclassified
						Otu0533	38.3123	-10.7376	2.98861	-3.59286	0.000327065	0.00244407	T30 ICN vs Exposed Site Tahala	Rhizobiales_unclassified	Rhizobiales_unclassified
						Otu0536	1.41898	-6.90951	3.02325	-2.28546	0.0222861	0.0444641	T30 ICN vs Exposed Site Tahala	Flammeovirgaceae	Flammeovirgaceae_unclassified
						Otu0548	14.0427	-7.93359	3.0128	-2.6333	0.00845602	0.0253727	T30 ICN vs Exposed Site Tahala	Lactobacillaceae	Lactobacillus
						Otu0549	14.8932	-8.35452	2.85631	-2.92493	0.00344533	0.0152261	T30 ICN vs Exposed Site Tahala	Gammaproteobacteria_unclassified	Gammaproteobacteria_unclassified
						Otu0556	2.68714	-7.54521	3.01596	-2.50176	0.0123577	0.0315467	T30 ICN vs Exposed Site Tahala	Lactobacillales_unclassified	Lactobacillales_unclassified
						Otu0574	1.16429	-6.71994	3.02608	-2.22067	0.0263732	0.0463255	T30 ICN vs Exposed Site Tahala	Rhodobacteraceae	Roseivivax
						Otu0578	38.0703	-10.7499	2.71273	-3.96278	7.40834e-05	0.00080127	T30 ICN vs Exposed Site Tahala	Bacillaceae	Bacillus
						Otu0580	5.09376	-8.20912	3.01035	-2.72697	0.00639197	0.0228443	T30 ICN vs Exposed Site Tahala	Sphingobacteriales_unclassified	Sphingobacteriales_unclassified
						Otu0583	1.30833	-6.79471	3.02493	-2.24624	0.0246886	0.0463255	T30 ICN vs Exposed Site Tahala	Flammeovirgaceae	Flammeovirgaceae_unclassified
						Otu0586	1.30982	-6.83221	3.02437	-2.25906	0.0238799	0.0462955	T30 ICN vs Exposed Site Tahala	Rhodobacteraceae	Dinoroseobacter
						Otu0599	24.1283	-10.0272	2.99549	-3.34744	0.00081563	0.00446965	T30 ICN vs Exposed Site Tahala	Mycobacteriaceae	Mycobacterium
						Otu0600	51.5325	-11.1918	2.98547	-3.74875	0.000177721	0.00166514	T30 ICN vs Exposed Site Tahala	Comamonadaceae	Paucibacter
						Otu0603	1.20067	-6.7491	3.02563	-2.23065	0.0257046	0.0463255	T30 ICN vs Exposed Site Tahala	Chlorobiaceae	Prosthecochloris
						Otu0610	2.05808	-7.27413	3.0187	-2.40969	0.0159661	0.0372845	T30 ICN vs Exposed Site Tahala	Rhodocyclaceae	Rhodocyclaceae_unclassified
						Otu0614	39.3541	-10.8252	2.95213	-3.6669	0.000245511	0.00197853	T30 ICN vs Exposed Site Tahala	Enterobacteriaceae	Yersinia
						Otu0615	6.70838	-8.56106	2.78938	-3.06916	0.00214662	0.0103795	T30 ICN vs Exposed Site Tahala	Francisellaceae	Francisellaceae_unclassified
						Otu0634	1.1279	-6.68999	3.02656	-2.21042	0.0270758	0.0463255	T30 ICN vs Exposed Site Tahala	Spirochaetes_unclassified	Spirochaetes_unclassified
						Otu0638	1.92945	-7.20883	3.01944	-2.38747	0.0169647	0.0383642	T30 ICN vs Exposed Site Tahala	Cystobacterineae	Cystobacterineae_unclassified
						Otu0639	1.92945	-7.20883	3.01944	-2.38747	0.0169647	0.0383642	T30 ICN vs Exposed Site Tahala	Clostridiales_unclassified	Clostridiales_unclassified
						Otu0660	1.86514	-7.1747	3.01984	-2.37586	0.0175083	0.0386876	T30 ICN vs Exposed Site Tahala	Gordoniaceae	Gordonia
						Otu0661	83.6458	-11.9183	2.98202	-3.99671	6.423e-05	0.00072179	T30 ICN vs Exposed Site Tahala	Rhizobiales_unclassified	Rhizobiales_unclassified
						Otu0671	3.14855	-6.55938	2.89148	-2.26852	0.0232974	0.0459131	T30 ICN vs Exposed Site Tahala	Rhizobiales_unclassified	Rhizobiales_unclassified
						Otu0675	3.25062	-7.70752	3.01454	-2.55678	0.0105645	0.028755	T30 ICN vs Exposed Site Tahala	Comamonadaceae	Rubrivivax
						Otu0681	1.73651	-7.10317	3.0207	-2.3515	0.018698	0.0410955	T30 ICN vs Exposed Site Tahala	Bacteria_unclassified	Bacteria_unclassified
						Otu0690	1.47925	-6.94477	3.02276	-2.29749	0.0215908	0.0434992	T30 ICN vs Exposed Site Tahala	Sphingomonadaceae	Blastomonas
						Otu0692	1.60788	-7.02678	3.02167	-2.32546	0.0200473	0.0421621	T30 ICN vs Exposed Site Tahala	Pirellulaceae	Pirellulaceae_unclassified
						Otu0698	7.74292	-7.35623	2.81082	-2.61712	0.00886759	0.0261227	T30 ICN vs Exposed Site Tahala	Micrococcaceae	Micrococcaceae_unclassified
						Otu0701	7.67552	-7.30116	3.01841	-2.41888	0.0155683	0.0365634	T30 ICN vs Exposed Site Tahala	Myxococcales_unclassified	Myxococcales_unclassified
						Otu0712	0.873215	-6.45361	3.03069	-2.12942	0.0332195	0.0494643	T30 ICN vs Exposed Site Tahala	Alteromonadaceae	nsmpVI
						Otu0716	1.56277	-6.9715	3.0224	-2.30661	0.0210766	0.0434992	T30 ICN vs Exposed Site Tahala	Bacteroidetes_unclassified	Bacteroidetes_unclassified
						Otu0718	1.47925	-6.94477	3.02276	-2.29749	0.0215908	0.0434992	T30 ICN vs Exposed Site Tahala	Bdellovibrionaceae	Bdellovibrio
						Otu0719	1.95484	-7.18753	3.01969	-2.38023	0.017302	0.0386475	T30 ICN vs Exposed Site Tahala	A_unclassified	A_unclassified
						Otu0733	1.16612	-6.71588	3.02615	-2.21928	0.0264675	0.0463255	T30 ICN vs Exposed Site Tahala	Bacillaceae	Bacillus
						Otu0741	7.68715	-8.72776	3.00424	-2.90515	0.00367076	0.0158809	T30 ICN vs Exposed Site Tahala	Weeksellaceae	Cloacibacterium
						Otu0744	0.800447	-6.37541	3.0322	-2.10257	0.0355032	0.0494643	T30 ICN vs Exposed Site Tahala	SB-	SB-_unclassified
						Otu0750	0.964727	-6.53805	3.02914	-2.15838	0.0308981	0.0479212	T30 ICN vs Exposed Site Tahala	Myxococcales_unclassified	Myxococcales_unclassified
						Otu0754	1.35062	-6.85625	3.02401	-2.26727	0.0233739	0.0459131	T30 ICN vs Exposed Site Tahala	Comamonadaceae	Comamonadaceae_unclassified
						Otu0759	6.5361	-8.41223	2.36018	-3.56423	0.000364924	0.00267828	T30 ICN vs Exposed Site Tahala	Dietziaceae	Dietzia
						Otu0768	1.2863	-6.80919	3.02471	-2.25119	0.0243735	0.0463255	T30 ICN vs Exposed Site Tahala	Bacillaceae	Geobacillus
						Otu0770	1.2863	-6.80919	3.02471	-2.25119	0.0243735	0.0463255	T30 ICN vs Exposed Site Tahala	Alphaproteobacteria_unclassified	Alphaproteobacteria_unclassified
						Otu0775	3.92498	-7.93341	3.0128	-2.63324	0.00845757	0.0253727	T30 ICN vs Exposed Site Tahala	Alphaproteobacteria_unclassified	Alphaproteobacteria_unclassified
						Otu0795	1.15767	-6.70861	3.02626	-2.2168	0.0266371	0.0463255	T30 ICN vs Exposed Site Tahala	Actinomycetaceae	Actinomyces
						Otu0804	0.848959	-6.33205	3.03307	-2.08767	0.0368274	0.0494643	T30 ICN vs Exposed Site Tahala	Planococcaceae	Planomicrobium
						Otu0805	31.836	-10.4494	2.99112	-3.49348	0.000476761	0.00316046	T30 ICN vs Exposed Site Tahala	Alteromonadales_unclassified	Alteromonadales_unclassified
						Otu0807	4.2448	-7.99821	3.01235	-2.65514	0.00792754	0.0253727	T30 ICN vs Exposed Site Tahala	Alteromonadaceae	Microbulbifer
						Otu0816	1.09027	-6.61816	3.02775	-2.18583	0.0288277	0.0463255	T30 ICN vs Exposed Site Tahala	Proteobacteria_unclassified	Proteobacteria_unclassified
						Otu0824	31.836	-10.4494	2.99112	-3.49348	0.000476761	0.00316046	T30 ICN vs Exposed Site Tahala	Chitinophagaceae	Flavisolibacter
						Otu0830	1.02904	-6.5979	3.0281	-2.17889	0.0293396	0.0463255	T30 ICN vs Exposed Site Tahala	Betaproteobacteria_unclassified	Betaproteobacteria_unclassified
						Otu0834	1.02904	-6.5979	3.0281	-2.17889	0.0293396	0.0463255	T30 ICN vs Exposed Site Tahala	Bacteroidetes_unclassified	Bacteroidetes_unclassified
						Otu0840	1.11705	-6.62806	3.02758	-2.18922	0.0285805	0.0463255	T30 ICN vs Exposed Site Tahala	Bacteria_unclassified	Bacteria_unclassified
						Otu0846	3.48887	-7.80621	3.01375	-2.5902	0.00959194	0.0275685	T30 ICN vs Exposed Site Tahala	Pirellulaceae	Pirellulaceae_unclassified
						Otu0853	0.872219	-6.40817	3.03156	-2.11382	0.0345305	0.0494643	T30 ICN vs Exposed Site Tahala	Flavobacteriaceae	Flavobacteriaceae_unclassified
						Otu0861	15.0802	-9.52752	2.99801	-3.17794	0.00148324	0.00752608	T30 ICN vs Exposed Site Tahala	TM-_unclassified	TM-_unclassified
						Otu0862	2.83471	-7.58462	3.0156	-2.51513	0.0118989	0.0307535	T30 ICN vs Exposed Site Tahala	Rhodobacteraceae	Rhodobacteraceae_unclassified
						Otu0863	1.07864	-6.5904	3.02823	-2.17632	0.0295311	0.0463255	T30 ICN vs Exposed Site Tahala	Micrococcaceae	Arthrobacter
						Otu0867	5.02673	-7.93395	3.0128	-2.63342	0.00845307	0.0253727	T30 ICN vs Exposed Site Tahala	Eubacteriaceae	Acetobacterium
						Otu0874	0.964727	-6.53805	3.02914	-2.15838	0.0308981	0.0479212	T30 ICN vs Exposed Site Tahala	Bacteroidales_unclassified	Bacteroidales_unclassified
						Otu0898	0.900411	-6.47473	3.0303	-2.13666	0.0326253	0.0494643	T30 ICN vs Exposed Site Tahala	SBRH_unclassified	SBRH_unclassified
						Otu0902	11.3545	-7.23168	2.76759	-2.61299	0.0089754	0.0261623	T30 ICN vs Exposed Site Tahala	Parachlamydiaceae	Candidatus_Protochlamydia
						Otu0904	1.05414	-6.59328	3.02818	-2.17731	0.0294573	0.0463255	T30 ICN vs Exposed Site Tahala	Bacillaceae	Bacillaceae_unclassified
						Otu0909	5.6076	-8.30195	2.83216	-2.93131	0.00337536	0.0150791	T30 ICN vs Exposed Site Tahala	Caulobacteraceae	Mycoplana
						Otu0922	50.9376	-11.1731	2.98558	-3.74234	0.000182314	0.00166514	T30 ICN vs Exposed Site Tahala	Rhodobacteraceae	Rhodobaca
						Otu0928	0.836096	-6.40748	3.03157	-2.11358	0.0345507	0.0494643	T30 ICN vs Exposed Site Tahala	Nitrospiraceae	Nitrospira
						Otu0935	8.40734	-8.19036	2.99753	-2.73237	0.00628805	0.0226701	T30 ICN vs Exposed Site Tahala	Corynebacteriaceae	Corynebacterium
						Otu0939	5.51824	-8.30899	3.00901	-2.76137	0.005756	0.0211225	T30 ICN vs Exposed Site Tahala	Cryomorphaceae	Fluviicola
						Otu0940	21.7825	-10.0104	2.99556	-3.34175	0.000832509	0.00450212	T30 ICN vs Exposed Site Tahala	Cytophagaceae	Dyadobacter
						Otu0943	2.83471	-7.58462	3.0156	-2.51513	0.0118989	0.0307535	T30 ICN vs Exposed Site Tahala	Pirellulaceae	Pirellulaceae_unclassified
						Otu0960	2.18055	-7.3099	3.01831	-2.42185	0.0154416	0.0365634	T30 ICN vs Exposed Site Tahala	Rhizobiales_unclassified	Rhizobiales_unclassified
						Otu0976	2.97136	-7.60879	3.01538	-2.52332	0.0116251	0.0304326	T30 ICN vs Exposed Site Tahala	Rhodocyclaceae	Zoogloea
						Otu0992	31.836	-10.4494	2.99112	-3.49348	0.000476761	0.00316046	T30 ICN vs Exposed Site Tahala	Rhodobacteraceae	Rhodobacteraceae_unclassified
						Otu0999	2.3986	-7.40898	3.01728	-2.45552	0.0140681	0.0340116	T30 ICN vs Exposed Site Tahala	Actinomycetales_unclassified	Actinomycetales_unclassified
						Otu1017	2.1224	-7.25022	3.01897	-2.40156	0.0163255	0.0376955	T30 ICN vs Exposed Site Tahala	Flavobacteriaceae	Flavobacteriaceae_unclassified
						Otu1018	0.944987	-6.48621	3.03008	-2.14061	0.0323058	0.0493594	T30 ICN vs Exposed Site Tahala	TM-_unclassified	TM-_unclassified
						Otu1023	4.66928	-8.10369	3.01165	-2.69078	0.00712854	0.0248291	T30 ICN vs Exposed Site Tahala	Rickettsiaceae	Rickettsia
						Otu1031	9.76303	-8.17757	3.01079	-2.71609	0.00660583	0.0232051	T30 ICN vs Exposed Site Tahala	Bacillaceae	Bacillus
						Otu1037	1.74444	-7.0814	3.02097	-2.34408	0.019074	0.0416991	T30 ICN vs Exposed Site Tahala	Rhodospirillales_unclassified	Rhodospirillales_unclassified
						Otu1038	16.7558	-9.66607	2.99723	-3.225	0.00125972	0.00647182	T30 ICN vs Exposed Site Tahala	Flavobacteriaceae	Salinimicrobium
						Otu1050	8.37789	-8.75033	3.00401	-2.91288	0.00358111	0.0156578	T30 ICN vs Exposed Site Tahala	Nocardioidaceae	Nocardioides
						Otu1059	5.02673	-7.93395	3.0128	-2.63342	0.00845307	0.0253727	T30 ICN vs Exposed Site Tahala	Bacteroidetes_unclassified	Bacteroidetes_unclassified
						Otu1061	4.2448	-7.99821	3.01235	-2.65514	0.00792754	0.0253727	T30 ICN vs Exposed Site Tahala	OPB_unclassified	OPB_unclassified
						Otu1075	3.82032	-7.88227	3.01317	-2.61594	0.00889824	0.0261227	T30 ICN vs Exposed Site Tahala	Bacillaceae	Bacillus
						Otu1077	3.25062	-7.70752	3.01454	-2.55678	0.0105645	0.028755	T30 ICN vs Exposed Site Tahala	Clostridiaceae	Clostridiaceae_unclassified
						Otu1078	1.96249	-7.20139	3.01953	-2.38494	0.0170819	0.0383642	T30 ICN vs Exposed Site Tahala	Bacteriovoracaceae	Bacteriovoracaceae_unclassified
						Otu1079	3.35116	-6.60392	3.02799	-2.18096	0.0291866	0.0463255	T30 ICN vs Exposed Site Tahala	Cystobacteraceae	Cystobacter
						Otu1080	7.21615	-6.9139	3.02319	-2.28695	0.0221985	0.0444641	T30 ICN vs Exposed Site Tahala	Rhodobacteraceae	Paracoccus
						Otu1083	2.29283	-7.33643	2.8591	-2.56599	0.0102882	0.0284143	T30 ICN vs Exposed Site Tahala	Oxalobacteraceae	Polynucleobacter
						Otu1085	27.446	-10.2261	2.95685	-3.45845	0.000543297	0.00343531	T30 ICN vs Exposed Site Tahala	Bacteroidetes_unclassified	Bacteroidetes_unclassified
						Otu1087	1.96249	-7.20139	3.01953	-2.38494	0.0170819	0.0383642	T30 ICN vs Exposed Site Tahala	Pirellulaceae	Pirellulaceae_unclassified
						Otu1088	0.966419	-6.49651	3.02989	-2.14414	0.0320217	0.0492919	T30 ICN vs Exposed Site Tahala	BD-_unclassified	BD-_unclassified
						Otu1096	4.22246	-7.88844	3.01312	-2.61803	0.00884402	0.0261227	T30 ICN vs Exposed Site Tahala	ABY_unclassified	ABY_unclassified
						Otu1104	6.70231	-8.45263	3.00723	-2.81077	0.00494234	0.0186358	T30 ICN vs Exposed Site Tahala	Nitrospiraceae	Nitrospira
						Otu1114	0.886315	-6.44237	3.0309	-2.12556	0.0335398	0.0494643	T30 ICN vs Exposed Site Tahala	Comamonadaceae	Tepidimonas
						Otu1117	1.19379	-6.71441	3.02617	-2.21878	0.0265017	0.0463255	T30 ICN vs Exposed Site Tahala	Planctomycetaceae	Planctomyces
						Otu1126	1.05414	-6.59328	3.02818	-2.17731	0.0294573	0.0463255	T30 ICN vs Exposed Site Tahala	Rhizobiales_unclassified	Rhizobiales_unclassified
						Otu1162	0.848959	-6.33205	3.03307	-2.08767	0.0368274	0.0494643	T30 ICN vs Exposed Site Tahala	Gammaproteobacteria_unclassified	Gammaproteobacteria_unclassified
						Otu1180	3.39584	-7.75354	3.01416	-2.57237	0.0101004	0.0284143	T30 ICN vs Exposed Site Tahala	Sinobacteraceae	Sinobacteraceae_unclassified
						Otu1187	2.97136	-7.60879	3.01538	-2.52332	0.0116251	0.0304326	T30 ICN vs Exposed Site Tahala	Bacteroidetes_unclassified	Bacteroidetes_unclassified
						Otu1199	1.27344	-6.72604	3.02599	-2.22276	0.0262321	0.0463255	T30 ICN vs Exposed Site Tahala	BD-_unclassified	BD-_unclassified
						Otu1222	1.52638	-6.94716	3.02273	-2.29831	0.0215444	0.0434992	T30 ICN vs Exposed Site Tahala	Pirellulaceae	Pirellulaceae_unclassified
						Otu1230	8.06511	-7.50772	3.01631	-2.48904	0.0128088	0.0324964	T30 ICN vs Exposed Site Tahala	Rhabdochlamydiaceae	Candidatus_Rhabdochlamydia
						Otu1234	2.97136	-7.60879	3.01538	-2.52332	0.0116251	0.0304326	T30 ICN vs Exposed Site Tahala	Rhodocyclaceae	Candidatus_Accumulibacter
						Otu1235	1.52638	-6.94716	3.02273	-2.29831	0.0215444	0.0434992	T30 ICN vs Exposed Site Tahala	Proteobacteria_unclassified	Proteobacteria_unclassified
						Otu1237	2.97136	-7.60879	3.01538	-2.52332	0.0116251	0.0304326	T30 ICN vs Exposed Site Tahala	Micrococcaceae	Arthrobacter
						Otu1248	7.26084	-8.56846	3.00591	-2.85054	0.00436452	0.0181194	T30 ICN vs Exposed Site Tahala	Bacteroidetes_unclassified	Bacteroidetes_unclassified
						Otu1255	1.27344	-6.72604	3.02599	-2.22276	0.0262321	0.0463255	T30 ICN vs Exposed Site Tahala	Sphingomonadaceae	Sphingomonadaceae_unclassified
						Otu1260	1.30833	-6.79471	3.02493	-2.24624	0.0246886	0.0463255	T30 ICN vs Exposed Site Tahala	Caulobacteraceae	Phenylobacterium
						Otu1269	1.67558	-7.02994	3.02163	-2.32654	0.0199897	0.0421621	T30 ICN vs Exposed Site Tahala	Bacteroidales_unclassified	Bacteroidales_unclassified
						Otu1273	1.71189	-6.45795	3.01534	-2.1417	0.0322177	0.0493594	T30 ICN vs Exposed Site Tahala	Weeksellaceae	Chryseobacterium
						Otu1286	1.30833	-6.79471	3.02493	-2.24624	0.0246886	0.0463255	T30 ICN vs Exposed Site Tahala	Flavobacteriaceae	Maribacter
						Otu1292	10.0535	-8.99234	3.00181	-2.99564	0.00273873	0.0127865	T30 ICN vs Exposed Site Tahala	Chlamydiales_unclassified	Chlamydiales_unclassified
						Otu1294	2.54688	-7.44337	3.01693	-2.4672	0.0136175	0.0331172	T30 ICN vs Exposed Site Tahala	Rhodospirillaceae	Rhodospirillaceae_unclassified
						Otu1295	1.30833	-6.79471	3.02493	-2.24624	0.0246886	0.0463255	T30 ICN vs Exposed Site Tahala	Chlamydiales_unclassified	Chlamydiales_unclassified
						Otu1296	1.67558	-7.02994	3.02163	-2.32654	0.0199897	0.0421621	T30 ICN vs Exposed Site Tahala	Gammaproteobacteria_unclassified	Gammaproteobacteria_unclassified
						Otu1309	1.30833	-6.79471	3.02493	-2.24624	0.0246886	0.0463255	T30 ICN vs Exposed Site Tahala	Thermoactinomycetaceae	Planifilum
						Otu1315	2.54688	-7.44337	3.01693	-2.4672	0.0136175	0.0331172	T30 ICN vs Exposed Site Tahala	Bdellovibrionaceae	Bdellovibrio
						Otu1318	2.54688	-7.44337	3.01693	-2.4672	0.0136175	0.0331172	T30 ICN vs Exposed Site Tahala	Gemm-_unclassified	Gemm-_unclassified
						Otu1321	2.54688	-7.44337	3.01693	-2.4672	0.0136175	0.0331172	T30 ICN vs Exposed Site Tahala	CV_unclassified	CV_unclassified
						Otu1327	12.8799	-6.90242	3.02335	-2.28303	0.0224284	0.0445318	T30 ICN vs Exposed Site Tahala	Rhodocyclaceae	Dechloromonas
						Otu1333	1.67558	-7.02994	3.02163	-2.32654	0.0199897	0.0421621	T30 ICN vs Exposed Site Tahala	Bacteria_unclassified	Bacteria_unclassified
						Otu1338	1.39631	-6.84683	3.02415	-2.26405	0.0235709	0.0459131	T30 ICN vs Exposed Site Tahala	Bacillaceae	Bacillaceae_unclassified
						Otu1378	5.15536	-8.05943	3.01194	-2.67583	0.00745449	0.0253727	T30 ICN vs Exposed Site Tahala	Oceanospirillales_unclassified	Oceanospirillales_unclassified
						Otu1379	2.1224	-7.25022	3.01897	-2.40156	0.0163255	0.0376955	T30 ICN vs Exposed Site Tahala	SR_unclassified	SR_unclassified
						Otu1386	1.09027	-6.61816	3.02775	-2.18583	0.0288277	0.0463255	T30 ICN vs Exposed Site Tahala	Pirellulaceae	Pirellulaceae_unclassified
						Otu1387	1.09027	-6.61816	3.02775	-2.18583	0.0288277	0.0463255	T30 ICN vs Exposed Site Tahala	Hyphomicrobiaceae	Hyphomicrobium
						Otu1397	31.836	-10.4494	2.99112	-3.49348	0.000476761	0.00316046	T30 ICN vs Exposed Site Tahala	Legionellaceae	Legionella
						Otu1401	1.39631	-6.84683	3.02415	-2.26405	0.0235709	0.0459131	T30 ICN vs Exposed Site Tahala	Campylobacteraceae	Campylobacter
						Otu1404	5.02673	-7.93395	3.0128	-2.63342	0.00845307	0.0253727	T30 ICN vs Exposed Site Tahala	Micrococcaceae	Kocuria
						Otu1416	5.87569	-8.29386	3.00921	-2.75616	0.0058485	0.021272	T30 ICN vs Exposed Site Tahala	Clostridiaceae	Clostridium
						Otu1423	31.836	-10.4494	2.99112	-3.49348	0.000476761	0.00316046	T30 ICN vs Exposed Site Tahala	Flammeovirgaceae	Flammeovirgaceae_unclassified
						Otu1432	31.836	-10.4494	2.99112	-3.49348	0.000476761	0.00316046	T30 ICN vs Exposed Site Tahala	Bacteria_unclassified	Bacteria_unclassified
						Otu1440	1.69792	-7.01793	3.02179	-2.32244	0.0202091	0.0421621	T30 ICN vs Exposed Site Tahala	Legionellaceae	Legionellaceae_unclassified
						Otu1451	1.69792	-7.01793	3.02179	-2.32244	0.0202091	0.0421621	T30 ICN vs Exposed Site Tahala	Procabacteriaceae	Procabacteriaceae_unclassified
						Otu1455	1.11705	-6.62806	3.02758	-2.18922	0.0285805	0.0463255	T30 ICN vs Exposed Site Tahala	Alphaproteobacteria_unclassified	Alphaproteobacteria_unclassified
						Otu1458	25.4688	-10.0964	2.99487	-3.37124	0.000748302	0.00424474	T30 ICN vs Exposed Site Tahala	Chitinophagaceae	Chitinophagaceae_unclassified
						Otu1461	6.70231	-8.45263	3.00723	-2.81077	0.00494234	0.0186358	T30 ICN vs Exposed Site Tahala	Sphingomonadales_unclassified	Sphingomonadales_unclassified
						Otu1469	19.1016	-7.93395	3.0128	-2.63342	0.00845307	0.0253727	T30 ICN vs Exposed Site Tahala	Tissierellaceae	Peptoniphilus
						Otu1472	25.4688	-10.0964	2.99487	-3.37124	0.000748302	0.00424474	T30 ICN vs Exposed Site Tahala	Bacteroidetes_unclassified	Bacteroidetes_unclassified
						Otu1473	1.30982	-6.75657	3.02551	-2.2332	0.0255358	0.0463255	T30 ICN vs Exposed Site Tahala	Bacteroidetes_unclassified	Bacteroidetes_unclassified
						Otu1485	25.4688	-10.0964	2.99487	-3.37124	0.000748302	0.00424474	T30 ICN vs Exposed Site Tahala	Thermicanaceae	Thermicanus
						Otu1488	6.70231	-8.45263	3.00723	-2.81077	0.00494234	0.0186358	T30 ICN vs Exposed Site Tahala	Myxococcales_unclassified	Myxococcales_unclassified
						Otu1489	6.70231	-8.45263	3.00723	-2.81077	0.00494234	0.0186358	T30 ICN vs Exposed Site Tahala	Rickettsiaceae	Rickettsia
						Otu1490	6.70231	-8.45263	3.00723	-2.81077	0.00494234	0.0186358	T30 ICN vs Exposed Site Tahala	Myxococcales_unclassified	Myxococcales_unclassified
						Otu1497	0.872219	-6.40817	3.03156	-2.11382	0.0345305	0.0494643	T30 ICN vs Exposed Site Tahala	Thiohalorhabdales_unclassified	Thiohalorhabdales_unclassified
						Otu1505	1.69792	-7.01793	3.02179	-2.32244	0.0202091	0.0421621	T30 ICN vs Exposed Site Tahala	TM_unclassified	TM_unclassified
						Otu1506	13.2929	-7.40078	3.01736	-2.45273	0.0141775	0.0340758	T30 ICN vs Exposed Site Tahala	Bacteria_unclassified	Bacteria_unclassified
						Otu1521	1.11705	-6.62806	3.02758	-2.18922	0.0285805	0.0463255	T30 ICN vs Exposed Site Tahala	MIZ_unclassified	MIZ_unclassified
						Otu1528	6.70231	-8.45263	3.00723	-2.81077	0.00494234	0.0186358	T30 ICN vs Exposed Site Tahala	Alteromonadaceae	Glaciecola
						Otu1537	25.4688	-10.0964	2.99487	-3.37124	0.000748302	0.00424474	T30 ICN vs Exposed Site Tahala	Alteromonadales_unclassified	Alteromonadales_unclassified
						Otu1549	6.70231	-8.45263	3.00723	-2.81077	0.00494234	0.0186358	T30 ICN vs Exposed Site Tahala	Dermacoccaceae	Dermacoccus
						Otu1560	25.4688	-10.0964	2.99487	-3.37124	0.000748302	0.00424474	T30 ICN vs Exposed Site Tahala	Flavobacteriaceae	Flavobacteriaceae_unclassified
						Otu1564	0.848959	-6.33205	3.03307	-2.08767	0.0368274	0.0494643	T30 ICN vs Exposed Site Tahala	Dermabacteraceae	Dermabacter
						Otu1565	1.11705	-6.62806	3.02758	-2.18922	0.0285805	0.0463255	T30 ICN vs Exposed Site Tahala	Bacteriovoracaceae	Bacteriovoracaceae_unclassified
						Otu1568	1.11705	-6.62806	3.02758	-2.18922	0.0285805	0.0463255	T30 ICN vs Exposed Site Tahala	Rhabdochlamydiaceae	Candidatus_Rhabdochlamydia
						Otu1569	6.70231	-8.45263	3.00723	-2.81077	0.00494234	0.0186358	T30 ICN vs Exposed Site Tahala	Rhabdochlamydiaceae	Candidatus_Rhabdochlamydia
						Otu1578	0.872219	-6.40817	3.03156	-2.11382	0.0345305	0.0494643	T30 ICN vs Exposed Site Tahala	Planctomycetia_unclassified	Planctomycetia_unclassified
						Otu1579	1.26227	-6.73729	3.02581	-2.22661	0.0259735	0.0463255	T30 ICN vs Exposed Site Tahala	Sphingobacteriaceae	Sphingobacterium
						Otu1585	0.933427	-6.46695	3.03044	-2.134	0.0328431	0.0494643	T30 ICN vs Exposed Site Tahala	Parachlamydiaceae	Candidatus_Protochlamydia
						Otu1586	1.69792	-7.01793	3.02179	-2.32244	0.0202091	0.0421621	T30 ICN vs Exposed Site Tahala	Pirellulaceae	Pirellulaceae_unclassified
						Otu1596	0.872219	-6.40817	3.03156	-2.11382	0.0345305	0.0494643	T30 ICN vs Exposed Site Tahala	Sva_unclassified	Sva_unclassified
						Otu1606	0.872219	-6.40817	3.03156	-2.11382	0.0345305	0.0494643	T30 ICN vs Exposed Site Tahala	Gammaproteobacteria_unclassified	Gammaproteobacteria_unclassified
						Otu1609	6.70231	-8.45263	3.00723	-2.81077	0.00494234	0.0186358	T30 ICN vs Exposed Site Tahala	Gammaproteobacteria_unclassified	Gammaproteobacteria_unclassified
						Otu1629	0.837789	-6.35578	3.03259	-2.09583	0.0360975	0.0494643	T30 ICN vs Exposed Site Tahala	Procabacteriaceae	Procabacteriaceae_unclassified
						Otu1635	5.02673	-7.93395	3.0128	-2.63342	0.00845307	0.0253727	T30 ICN vs Exposed Site Tahala	Actinobacteria_unclassified	Actinobacteria_unclassified
						Otu1654	5.02673	-7.93395	3.0128	-2.63342	0.00845307	0.0253727	T30 ICN vs Exposed Site Tahala	Proteobacteria_unclassified	Proteobacteria_unclassified
						Otu1661	19.1016	-7.93395	3.0128	-2.63342	0.00845307	0.0253727	T30 ICN vs Exposed Site Tahala	Clostridiales_unclassified	Clostridiales_unclassified
						Otu1667	1.27344	-6.72604	3.02599	-2.22276	0.0262321	0.0463255	T30 ICN vs Exposed Site Tahala	Streptococcaceae	Streptococcus
						Otu1676	5.02673	-7.93395	3.0128	-2.63342	0.00845307	0.0253727	T30 ICN vs Exposed Site Tahala	Nannocystaceae	Plesiocystis
						Otu1681	19.1016	-7.93395	3.0128	-2.63342	0.00845307	0.0253727	T30 ICN vs Exposed Site Tahala	Coxiellaceae	Coxiellaceae_unclassified
						Otu1683	0.837789	-6.35578	3.03259	-2.09583	0.0360975	0.0494643	T30 ICN vs Exposed Site Tahala	Saprospiraceae	Saprospiraceae_unclassified
						Otu1688	1.27344	-6.72604	3.02599	-2.22276	0.0262321	0.0463255	T30 ICN vs Exposed Site Tahala	Campylobacteraceae	Sulfurospirillum
						Otu1702	0.837789	-6.35578	3.03259	-2.09583	0.0360975	0.0494643	T30 ICN vs Exposed Site Tahala	Legionellaceae	Tatlockia
						Otu1712	1.27344	-6.72604	3.02599	-2.22276	0.0262321	0.0463255	T30 ICN vs Exposed Site Tahala	TM-_unclassified	TM-_unclassified
						Otu1739	0.848959	-6.33205	3.03307	-2.08767	0.0368274	0.0494643	T30 ICN vs Exposed Site Tahala	Porphyromonadaceae	Porphyromonadaceae_unclassified
						Otu1793	3.35116	-6.60392	3.02799	-2.18096	0.0291866	0.0463255	T30 ICN vs Exposed Site Tahala	Sinobacteraceae	Nevskia
						Otu1808	0.848959	-6.33205	3.03307	-2.08767	0.0368274	0.0494643	T30 ICN vs Exposed Site Tahala	Prevotellaceae	Prevotella
						Otu1817	0.848959	-6.33205	3.03307	-2.08767	0.0368274	0.0494643	T30 ICN vs Exposed Site Tahala	Bacteroidales_unclassified	Bacteroidales_unclassified
						Otu1826	0.848959	-6.33205	3.03307	-2.08767	0.0368274	0.0494643	T30 ICN vs Exposed Site Tahala	Gemmataceae	Gemmata
						Otu1832	0.848959	-6.33205	3.03307	-2.08767	0.0368274	0.0494643	T30 ICN vs Exposed Site Tahala	Saprospiraceae	Saprospiraceae_unclassified
						Otu1860	0.848959	-6.33205	3.03307	-2.08767	0.0368274	0.0494643	T30 ICN vs Exposed Site Tahala	MIZ_unclassified	MIZ_unclassified
						Otu1873	3.35116	-6.60392	3.02799	-2.18096	0.0291866	0.0463255	T30 ICN vs Exposed Site Tahala	Pedosphaeraceae	Pedosphaera
						Otu1896	0.848959	-6.33205	3.03307	-2.08767	0.0368274	0.0494643	T30 ICN vs Exposed Site Tahala	Chitinophagaceae	Sediminibacterium
						Otu1979	0.848959	-6.33205	3.03307	-2.08767	0.0368274	0.0494643	T30 ICN vs Exposed Site Tahala	Christensenellaceae	Christensenellaceae_unclassified
						Otu2001	0.848959	-6.33205	3.03307	-2.08767	0.0368274	0.0494643	T30 ICN vs Exposed Site Tahala	Flavobacteriaceae	Flavobacterium
						Otu2071	0.848959	-6.33205	3.03307	-2.08767	0.0368274	0.0494643	T30 ICN vs Exposed Site Tahala	Beijerinckiaceae	Beijerinckia
						Otu2077	3.35116	-6.60392	3.02799	-2.18096	0.0291866	0.0463255	T30 ICN vs Exposed Site Tahala	Aerococcaceae	Aerococcaceae_unclassified
						Otu2078	3.35116	-6.60392	3.02799	-2.18096	0.0291866	0.0463255	T30 ICN vs Exposed Site Tahala	Lactobacillales_unclassified	Lactobacillales_unclassified
						Otu2106	0.848959	-6.33205	3.03307	-2.08767	0.0368274	0.0494643	T30 ICN vs Exposed Site Tahala	BD-_unclassified	BD-_unclassified
						Otu2108	0.848959	-6.33205	3.03307	-2.08767	0.0368274	0.0494643	T30 ICN vs Exposed Site Tahala	BD-_unclassified	BD-_unclassified
						Otu2151	0.848959	-6.33205	3.03307	-2.08767	0.0368274	0.0494643	T30 ICN vs Exposed Site Tahala	Bacteroidetes_unclassified	Bacteroidetes_unclassified
						Otu2153	3.35116	-6.60392	3.02799	-2.18096	0.0291866	0.0463255	T30 ICN vs Exposed Site Tahala	Rhodobacteraceae	Rubellimicrobium
						Otu2168	3.35116	-6.60392	3.02799	-2.18096	0.0291866	0.0463255	T30 ICN vs Exposed Site Tahala	Sphingomonadaceae	Sphingomonadaceae_unclassified
						Otu2175	0.848959	-6.33205	3.03307	-2.08767	0.0368274	0.0494643	T30 ICN vs Exposed Site Tahala	SBRH_unclassified	SBRH_unclassified
						Otu2231	3.35116	-6.60392	3.02799	-2.18096	0.0291866	0.0463255	T30 ICN vs Exposed Site Tahala	Legionellales_unclassified	Legionellales_unclassified
						Otu2264	0.848959	-6.33205	3.03307	-2.08767	0.0368274	0.0494643	T30 ICN vs Exposed Site Tahala	Cyanobacteria_unclassified	Cyanobacteria_unclassified
						Otu2305	0.848959	-6.33205	3.03307	-2.08767	0.0368274	0.0494643	T30 ICN vs Exposed Site Tahala	Halomonadaceae	Halomonas
						Otu2312	3.35116	-6.60392	3.02799	-2.18096	0.0291866	0.0463255	T30 ICN vs Exposed Site Tahala	Gammaproteobacteria_unclassified	Gammaproteobacteria_unclassified
						Otu2319	0.848959	-6.33205	3.03307	-2.08767	0.0368274	0.0494643	T30 ICN vs Exposed Site Tahala	Bacillaceae	Natronobacillus
						Otu0006	654.597	12.821	1.88711	6.79399	1.0907e-11	4.52642e-09	T30 Al Fahal vs Protected Site Tahala	Simkaniaceae	Simkaniaceae_unclassified
						Otu0016	434.055	-3.12927	0.952216	-3.2863	0.00101511	0.0468079	T30 Al Fahal vs Protected Site Tahala	Rhodobacteraceae	Rhodobacteraceae_unclassified
						Otu0026	128.492	-3.25414	0.974542	-3.33915	0.000840359	0.0439131	T30 Al Fahal vs Protected Site Tahala	Pseudoalteromonadaceae	Pseudoalteromonas
						Otu0029	53.6809	-5.64058	1.27578	-4.42128	9.81181e-06	0.0013573	T30 Al Fahal vs Protected Site Tahala	Vibrionaceae	Vibrio
						Otu0032	29.572	6.30365	1.4115	4.46594	7.97197e-06	0.00132335	T30 Al Fahal vs Protected Site Tahala	Flavobacteriaceae	Flavobacteriaceae_unclassified
						Otu0034	60.2683	4.30729	1.01442	4.24607	2.17557e-05	0.0025796	T30 Al Fahal vs Protected Site Tahala	Endozoicimonaceae	Endozoicimonaceae_unclassified
						Otu0036	88.0715	-6.431	1.67059	-3.84954	0.000118341	0.010501	T30 Al Fahal vs Protected Site Tahala	Vibrionaceae	Photobacterium
						Otu0048	54.2823	-2.96444	0.838085	-3.53716	0.000404455	0.0239784	T30 Al Fahal vs Protected Site Tahala	Idiomarinaceae	Idiomarina
						Otu0052	105.414	-8.72752	1.8062	-4.83198	1.35179e-06	0.000373995	T30 Al Fahal vs Protected Site Tahala	Campylobacteraceae	Arcobacter
						Otu0061	27.9908	-7.55048	1.60494	-4.70453	2.54452e-06	0.000527988	T30 Al Fahal vs Protected Site Tahala	Ferrimonadaceae	Ferrimonas
						Otu0077	20.2987	4.03699	1.20972	3.33712	0.000846517	0.0439131	T30 Al Fahal vs Protected Site Tahala	BD-_unclassified	BD-_unclassified
						Otu0081	113.753	-25.6049	2.18468	-11.7202	1.00437e-31	8.3363e-29	T30 Al Fahal vs Protected Site Tahala	Acidaminobacteraceae	Fusibacter
						Otu0092	22.6942	-8.09026	2.18237	-3.7071	0.000209642	0.0158185	T30 Al Fahal vs Protected Site Tahala	Peptostreptococcaceae	Tepidibacter
						Otu0098	6.00706	4.83883	1.4583	3.31812	0.00090625	0.0442463	T30 Al Fahal vs Protected Site Tahala	Hyphomonadaceae	Hyphomonas
						Otu0102	46.4844	-9.12523	2.22976	-4.09246	4.26814e-05	0.00442819	T30 Al Fahal vs Protected Site Tahala	Clostridiaceae	Clostridiaceae_unclassified
						Otu0146	16.3971	-7.61953	2.14127	-3.55841	0.000373107	0.0239784	T30 Al Fahal vs Protected Site Tahala	Vibrionaceae	Vibrionaceae_unclassified
						Otu0153	17.3475	-7.70141	2.00916	-3.83314	0.000126518	0.010501	T30 Al Fahal vs Protected Site Tahala	Flammeovirgaceae	Persicobacter
						Otu0227	6.12359	-5.77552	1.62742	-3.54887	0.000386883	0.0239784	T30 Al Fahal vs Protected Site Tahala	Alphaproteobacteria_unclassified	Alphaproteobacteria_unclassified
						Otu0001	1111.96	6.72158	1.21691	5.52349	3.32332e-08	1.14832e-05	T30 Al Fahal vs Exposed Site Tahala	Endozoicimonaceae	Endozoicimonaceae_unclassified
						Otu0022	164.047	-2.68048	0.822098	-3.26054	0.00111201	0.0412927	T30 Al Fahal vs Exposed Site Tahala	Alteromonadaceae	Marinobacter
						Otu0024	20.0873	-5.35754	1.44114	-3.71756	0.000201153	0.0127036	T30 Al Fahal vs Exposed Site Tahala	Bacteriovoracaceae	Bacteriovoracaceae_unclassified
						Otu0029	73.935	4.10232	1.21188	3.38508	0.000711567	0.0333065	T30 Al Fahal vs Exposed Site Tahala	Vibrionaceae	Vibrio
						Otu0032	28.293	-5.79875	1.24401	-4.66135	3.14137e-06	0.000515812	T30 Al Fahal vs Exposed Site Tahala	Flavobacteriaceae	Flavobacteriaceae_unclassified
						Otu0034	50.0659	-3.56987	1.02882	-3.46987	0.000520716	0.0267193	T30 Al Fahal vs Exposed Site Tahala	Endozoicimonaceae	Endozoicimonaceae_unclassified
						Otu0036	120.043	8.12232	1.52242	5.33514	9.54706e-08	1.95953e-05	T30 Al Fahal vs Exposed Site Tahala	Vibrionaceae	Photobacterium
						Otu0049	12.3691	5.5194	1.72125	3.20662	0.00134303	0.044105	T30 Al Fahal vs Exposed Site Tahala	Campylobacteraceae	Arcobacter
						Otu0052	138.447	9.65096	1.76035	5.4824	4.19605e-08	1.14832e-05	T30 Al Fahal vs Exposed Site Tahala	Campylobacteraceae	Arcobacter
						Otu0065	22.722	-3.53135	1.08679	-3.24932	0.0011568	0.0412927	T30 Al Fahal vs Exposed Site Tahala	Alteromonadaceae	Glaciecola
						Otu0066	9.55345	-4.85535	1.44484	-3.36046	0.000778115	0.0336228	T30 Al Fahal vs Exposed Site Tahala	Rhodobacteraceae	Rhodobacteraceae_unclassified
						Otu0077	25.5073	-3.84392	1.17137	-3.28156	0.00103235	0.04036	T30 Al Fahal vs Exposed Site Tahala	BD-_unclassified	BD-_unclassified
						Otu0081	158.684	24.7032	2.25886	10.9361	7.74406e-28	6.35787e-25	T30 Al Fahal vs Exposed Site Tahala	Acidaminobacteraceae	Fusibacter
						Otu0091	8.51808	-4.41797	1.33778	-3.30247	0.000958365	0.0393409	T30 Al Fahal vs Exposed Site Tahala	BD-_unclassified	BD-_unclassified
						Otu0092	30.9099	8.91614	2.26033	3.94462	7.99258e-05	0.00656191	T30 Al Fahal vs Exposed Site Tahala	Peptostreptococcaceae	Tepidibacter
						Otu0097	46.7335	5.149	1.45943	3.5281	0.000418562	0.0245457	T30 Al Fahal vs Exposed Site Tahala	BD-_unclassified	BD-_unclassified
						Otu0098	9.33173	-5.07746	1.32414	-3.83453	0.000125807	0.00938977	T30 Al Fahal vs Exposed Site Tahala	Hyphomonadaceae	Hyphomonas
						Otu0102	64.234	9.9719	2.31139	4.31424	1.60153e-05	0.00219143	T30 Al Fahal vs Exposed Site Tahala	Clostridiaceae	Clostridiaceae_unclassified
						Otu0113	20.4574	5.21297	1.6381	3.18232	0.001461	0.046134	T30 Al Fahal vs Exposed Site Tahala	Campylobacteraceae	Arcobacter
						Otu0136	6.52299	6.67321	1.91622	3.48249	0.000496778	0.0267193	T30 Al Fahal vs Exposed Site Tahala	Endozoicimonaceae	Endozoicimonaceae_unclassified
						Otu0146	22.0079	8.42445	2.21623	3.80125	0.00014397	0.00984997	T30 Al Fahal vs Exposed Site Tahala	Vibrionaceae	Vibrionaceae_unclassified
						Otu0150	10.7416	7.39233	1.82363	4.05364	5.04266e-05	0.00517503	T30 Al Fahal vs Exposed Site Tahala	Acidaminobacteraceae	Fusibacter
						Otu0153	23.7974	8.53768	2.07863	4.10735	4.00217e-05	0.00469398	T30 Al Fahal vs Exposed Site Tahala	Flammeovirgaceae	Persicobacter
						Otu0167	7.40668	-5.04898	1.49468	-3.37797	0.000730227	0.0333065	T30 Al Fahal vs Exposed Site Tahala	Flammeovirgaceae	Roseivirga
						Otu0182	16.2299	7.98667	2.47081	3.2324	0.00122753	0.0419919	T30 Al Fahal vs Exposed Site Tahala	Vibrionales_unclassified	Vibrionales_unclassified
						Otu0227	8.03022	6.97399	1.75114	3.98254	6.81827e-05	0.00621977	T30 Al Fahal vs Exposed Site Tahala	Alphaproteobacteria_unclassified	Alphaproteobacteria_unclassified
						Otu0251	12.1603	7.56541	2.40111	3.15079	0.00162829	0.049512	T30 Al Fahal vs Exposed Site Tahala	Pseudoalteromonadaceae	Pseudoalteromonas
						Otu0001	10558.5	9.69418	1.27585	7.59819	3.00299e-14	1.89489e-11	T30 Exposed Site Tahala vs Protected Site Tahala	Endozoicimonaceae	Endozoicimonaceae_unclassified
						Otu0006	1136.15	9.43887	1.55903	6.05433	1.41001e-09	4.44857e-07	T30 Exposed Site Tahala vs Protected Site Tahala	Simkaniaceae	Simkaniaceae_unclassified
						Otu0100	29.5547	8.74063	2.10889	4.14466	3.40322e-05	0.00715811	T30 Exposed Site Tahala vs Protected Site Tahala	Leptospiraceae	Leptospira
						Otu0001	26667.7	-6.08069	1.09668	-5.54464	2.94553e-08	3.48309e-06	T33 ICN vs Al Fahal	Endozoicimonaceae	Endozoicimonaceae_unclassified
						Otu0002	1901.76	4.57207	1.10756	4.12807	3.65823e-05	0.00157304	T33 ICN vs Al Fahal	Vibrionaceae	Photobacterium
						Otu0005	102.456	9.47937	1.7498	5.4174	6.04726e-08	5.72071e-06	T33 ICN vs Al Fahal	Flavobacteriaceae	Flavobacteriaceae_unclassified
						Otu0007	199.301	6.62795	1.93388	3.42728	0.000609658	0.0186044	T33 ICN vs Al Fahal	Rhodobacteraceae	Rhodobacteraceae_unclassified
						Otu0016	120.099	9.70849	1.78709	5.43257	5.55497e-08	5.72071e-06	T33 ICN vs Al Fahal	Rhodobacteraceae	Rhodobacteraceae_unclassified
						Otu0017	20.6025	7.16509	1.76826	4.05205	5.07716e-05	0.00208826	T33 ICN vs Al Fahal	Rhodobacteraceae	Rhodobacteraceae_unclassified
						Otu0020	31.2085	7.76445	1.78482	4.35027	1.35971e-05	0.000803926	T33 ICN vs Al Fahal	Saprospiraceae	Saprospira
						Otu0023	31.1709	7.76229	2.32093	3.34447	0.00082439	0.024371	T33 ICN vs Al Fahal	Vibrionaceae	Vibrio
						Otu0024	300.061	-11.8856	1.71819	-6.91752	4.5962e-12	2.174e-09	T33 ICN vs Al Fahal	Bacteriovoracaceae	Bacteriovoracaceae_unclassified
						Otu0026	32.7707	7.83439	1.86545	4.19974	2.67219e-05	0.00132724	T33 ICN vs Al Fahal	Pseudoalteromonadaceae	Pseudoalteromonas
						Otu0036	69.3054	8.91521	1.88432	4.73125	2.2314e-06	0.000162377	T33 ICN vs Al Fahal	Vibrionaceae	Photobacterium
						Otu0037	13.5829	6.56418	1.75616	3.73781	0.000185629	0.00702418	T33 ICN vs Al Fahal	Flavobacteriaceae	Flavobacteriaceae_unclassified
						Otu0038	92.8935	-4.68519	1.35051	-3.46919	0.000522033	0.0165802	T33 ICN vs Al Fahal	Amoebophilaceae	SGUS
						Otu0062	10.0197	6.12574	1.76674	3.46726	0.000525799	0.0165802	T33 ICN vs Al Fahal	Alteromonadaceae	Glaciecola
						Otu0064	133.468	-11.5607	1.9048	-6.06924	1.28519e-09	4.05264e-07	T33 ICN vs Al Fahal	Flavobacteriaceae	Flavobacterium
						Otu0076	66.8582	-10.5635	1.78571	-5.91557	3.30729e-09	7.82175e-07	T33 ICN vs Al Fahal	Cytophagaceae	Flectobacillus
						Otu0078	75.0982	-10.731	1.84204	-5.82562	5.69008e-09	8.97135e-07	T33 ICN vs Al Fahal	Oxalobacteraceae	Polynucleobacter
						Otu0087	54.3296	-7.83727	1.38209	-5.67058	1.42319e-08	1.92334e-06	T33 ICN vs Al Fahal	Propionibacteriaceae	Propionibacterium
						Otu0089	68.2841	-10.5936	2.07622	-5.10235	3.35462e-07	2.64456e-05	T33 ICN vs Al Fahal	Microbacteriaceae	Candidatus_Rhodoluna
						Otu0096	91.2445	-9.08542	1.55373	-5.84749	4.99044e-09	8.97135e-07	T33 ICN vs Al Fahal	Alteromonadales_unclassified	Alteromonadales_unclassified
						Otu0114	39.844	-9.81629	2.34354	-4.18866	2.80601e-05	0.00132724	T33 ICN vs Al Fahal	Flavobacteriaceae	Flavobacteriaceae_unclassified
						Otu0125	33.5555	-9.56886	1.77665	-5.38591	7.20789e-08	6.19879e-06	T33 ICN vs Al Fahal	Pirellulaceae	Pirellulaceae_unclassified
						Otu0129	25.377	-9.16445	2.20258	-4.16077	3.17177e-05	0.00142881	T33 ICN vs Al Fahal	Microbacteriaceae	Microbacterium
						Otu0130	31.0749	-9.45799	2.06934	-4.57053	4.86486e-06	0.00030681	T33 ICN vs Al Fahal	Vibrionaceae	Photobacterium
						Otu0132	18.732	-8.72488	1.85635	-4.70003	2.60125e-06	0.000175771	T33 ICN vs Al Fahal	Cryomorphaceae	Fluviicola
						Otu0161	20.6097	-8.86393	2.07848	-4.26462	2.00238e-05	0.00111427	T33 ICN vs Al Fahal	Micrococcaceae	Micrococcus
						Otu0184	19.4146	-8.77629	2.3269	-3.77167	0.000162162	0.00639187	T33 ICN vs Al Fahal	SBRH_unclassified	SBRH_unclassified
						Otu0202	11.3064	-7.5857	2.08631	-3.63594	0.000276972	0.0100775	T33 ICN vs Al Fahal	Pelagibacteraceae	Pelagibacteraceae_unclassified
						Otu0209	21.4167	-8.91932	2.10572	-4.23575	2.27786e-05	0.00119714	T33 ICN vs Al Fahal	Comamonadaceae	Aquabacterium
						Otu0223	26.7128	-9.23901	2.58253	-3.57751	0.000346886	0.0121538	T33 ICN vs Al Fahal	Leptospiraceae	Turneriella
						Otu0224	24.364	-24.3988	2.98838	-8.16455	3.22646e-16	3.05223e-13	T33 ICN vs Al Fahal	Rickettsiales_unclassified	Rickettsiales_unclassified
						Otu0231	9.98748	-7.82421	2.20779	-3.54391	0.000394239	0.0133196	T33 ICN vs Al Fahal	Corynebacteriaceae	Corynebacterium
						Otu0280	22.0307	-8.96014	2.81104	-3.18748	0.00143519	0.039932	T33 ICN vs Al Fahal	mitochondria	mitochondria_unclassified
						Otu0427	6.48618	-7.19384	2.25482	-3.19043	0.00142063	0.039932	T33 ICN vs Al Fahal	Phyllobacteriaceae	Nitratireductor
						Otu0002	864.458	4.21365	1.27635	3.30133	0.000962274	0.00319366	T33 ICN vs Protected Site Tahala	Vibrionaceae	Photobacterium
						Otu0003	2021.94	5.02581	1.21015	4.15305	3.28078e-05	0.000217568	T33 ICN vs Protected Site Tahala	Alteromonadaceae	Alteromonas
						Otu0004	956.114	3.64743	0.989122	3.68755	0.000226428	0.00102146	T33 ICN vs Protected Site Tahala	Alteromonadaceae	Alteromonas
						Otu0005	539.624	12.6174	1.75458	7.19117	6.424e-13	2.69808e-11	T33 ICN vs Protected Site Tahala	Flavobacteriaceae	Flavobacteriaceae_unclassified
						Otu0006	2480.7	10.9427	2.14645	5.09803	3.43202e-07	4.51995e-06	T33 ICN vs Protected Site Tahala	Simkaniaceae	Simkaniaceae_unclassified
						Otu0007	237.036	8.14976	1.73446	4.69874	2.61773e-06	2.74862e-05	T33 ICN vs Protected Site Tahala	Rhodobacteraceae	Rhodobacteraceae_unclassified
						Otu0010	206.433	5.722	1.72847	3.31045	0.000931472	0.00319366	T33 ICN vs Protected Site Tahala	Alteromonadaceae	Alteromonas
						Otu0011	158.053	6.51053	1.76585	3.68691	0.000226991	0.00102146	T33 ICN vs Protected Site Tahala	Vibrionaceae	Vibrionaceae_unclassified
						Otu0013	224.872	3.8936	1.41714	2.74752	0.00600484	0.0140113	T33 ICN vs Protected Site Tahala	Endozoicimonaceae	Endozoicimonaceae_unclassified
						Otu0016	44.9593	9.03296	1.7491	5.16436	2.41267e-07	4.34394e-06	T33 ICN vs Protected Site Tahala	Rhodobacteraceae	Rhodobacteraceae_unclassified
						Otu0017	79.5915	9.85649	2.06867	4.76465	1.89181e-06	2.16698e-05	T33 ICN vs Protected Site Tahala	Rhodobacteraceae	Rhodobacteraceae_unclassified
						Otu0018	72.9207	4.34359	1.68885	2.57192	0.0101136	0.0208904	T33 ICN vs Protected Site Tahala	Oceanospirillaceae	Oleibacter
						Otu0020	4.82077	5.81037	1.95468	2.97254	0.0029535	0.00775293	T33 ICN vs Protected Site Tahala	Saprospiraceae	Saprospira
						Otu0022	38.848	6.80776	1.98047	3.43744	0.00058725	0.0023123	T33 ICN vs Protected Site Tahala	Alteromonadaceae	Marinobacter
						Otu0023	33.7352	23.2876	2.74231	8.49196	2.03184e-17	2.56012e-15	T33 ICN vs Protected Site Tahala	Vibrionaceae	Vibrio
						Otu0024	167.947	-4.19426	1.22701	-3.41827	0.000630197	0.00238221	T33 ICN vs Protected Site Tahala	Bacteriovoracaceae	Bacteriovoracaceae_unclassified
						Otu0026	22.5571	8.03737	1.80463	4.45375	8.43815e-06	6.45503e-05	T33 ICN vs Protected Site Tahala	Pseudoalteromonadaceae	Pseudoalteromonas
						Otu0030	37.4514	8.76838	1.71521	5.11214	3.18536e-07	4.51995e-06	T33 ICN vs Protected Site Tahala	Rhodobacteraceae	Anaerospora
						Otu0032	63.7909	9.53715	1.77861	5.36213	8.22465e-08	2.07261e-06	T33 ICN vs Protected Site Tahala	Flavobacteriaceae	Flavobacteriaceae_unclassified
						Otu0034	30.0879	5.45569	1.62441	3.35858	0.000783453	0.00282043	T33 ICN vs Protected Site Tahala	Endozoicimonaceae	Endozoicimonaceae_unclassified
						Otu0037	15.6427	7.50984	1.682	4.46482	8.01357e-06	6.45503e-05	T33 ICN vs Protected Site Tahala	Flavobacteriaceae	Flavobacteriaceae_unclassified
						Otu0046	16.9925	7.62786	1.74955	4.3599	1.3012e-05	9.10838e-05	T33 ICN vs Protected Site Tahala	GMDH_unclassified	GMDH_unclassified
						Otu0050	5.35852	5.96859	1.95455	3.05369	0.00226045	0.00632925	T33 ICN vs Protected Site Tahala	Alteromonadaceae	Glaciecola
						Otu0051	3.5179	3.75624	1.6991	2.21072	0.0270553	0.0429591	T33 ICN vs Protected Site Tahala	Rhodobacteraceae	Nautella
						Otu0053	9.31432	6.7606	1.79017	3.77651	0.000159039	0.000834954	T33 ICN vs Protected Site Tahala	Rhodothermaceae	Rubricoccus
						Otu0057	8.3581	6.60936	2.00219	3.30107	0.000963168	0.00319366	T33 ICN vs Protected Site Tahala	Flavobacteriaceae	Flavobacteriaceae_unclassified
						Otu0062	4.80526	5.80862	1.92158	3.02283	0.00250423	0.00685942	T33 ICN vs Protected Site Tahala	Alteromonadaceae	Glaciecola
						Otu0064	81.7296	-9.83198	1.83274	-5.36463	8.11147e-08	2.07261e-06	T33 ICN vs Protected Site Tahala	Flavobacteriaceae	Flavobacterium
						Otu0065	9.78706	6.82823	1.76136	3.87669	0.000105886	0.000580071	T33 ICN vs Protected Site Tahala	Alteromonadaceae	Glaciecola
						Otu0066	14.066	7.35603	1.97606	3.72258	0.0001972	0.000955662	T33 ICN vs Protected Site Tahala	Rhodobacteraceae	Rhodobacteraceae_unclassified
						Otu0067	29.4283	-5.25395	1.64958	-3.18502	0.00144744	0.00467634	T33 ICN vs Protected Site Tahala	Flavobacteriaceae	Tenacibaculum
						Otu0071	7.19168	6.38841	2.0692	3.08739	0.00201926	0.00591689	T33 ICN vs Protected Site Tahala	Vibrionaceae	Vibrio
						Otu0073	9.04333	6.71697	1.79006	3.75237	0.000175168	0.000882849	T33 ICN vs Protected Site Tahala	Oceanospirillaceae	Oceanospirillum
						Otu0074	5.64709	6.04321	1.93709	3.11974	0.0018101	0.00548045	T33 ICN vs Protected Site Tahala	Hyphomonadaceae	Hyphomonadaceae_unclassified
						Otu0076	41.3208	-8.84804	1.71331	-5.16431	2.4133e-07	4.34394e-06	T33 ICN vs Protected Site Tahala	Cytophagaceae	Flectobacillus
						Otu0077	3.79252	5.47058	1.95033	2.80495	0.00503251	0.0121942	T33 ICN vs Protected Site Tahala	BD-_unclassified	BD-_unclassified
						Otu0078	45.9219	-9.00052	1.7684	-5.08965	3.58726e-07	4.51995e-06	T33 ICN vs Protected Site Tahala	Oxalobacteraceae	Polynucleobacter
						Otu0080	5.4553	5.99096	2.1458	2.79195	0.00523916	0.0124554	T33 ICN vs Protected Site Tahala	Oceanospirillaceae	Marinomonas
						Otu0084	4.44464	5.69932	1.93037	2.95244	0.00315269	0.00810692	T33 ICN vs Protected Site Tahala	Hyphomonadaceae	Oceanicaulis
						Otu0087	35.0754	-4.63196	1.51516	-3.05707	0.00223514	0.00632925	T33 ICN vs Protected Site Tahala	Propionibacteriaceae	Propionibacterium
						Otu0089	42.2907	-8.88079	1.99705	-4.44697	8.70917e-06	6.45503e-05	T33 ICN vs Protected Site Tahala	Microbacteriaceae	Candidatus_Rhodoluna
						Otu0091	10.4086	6.91947	1.70439	4.0598	4.91148e-05	0.000309423	T33 ICN vs Protected Site Tahala	BD-_unclassified	BD-_unclassified
						Otu0096	53.4881	-7.76615	1.67574	-4.63446	3.57866e-06	3.46854e-05	T33 ICN vs Protected Site Tahala	Alteromonadales_unclassified	Alteromonadales_unclassified
						Otu0097	2.80576	5.04433	2.32522	2.1694	0.0300526	0.0467486	T33 ICN vs Protected Site Tahala	BD-_unclassified	BD-_unclassified
						Otu0098	4.77205	5.80052	1.94741	2.97858	0.00289586	0.00775293	T33 ICN vs Protected Site Tahala	Hyphomonadaceae	Hyphomonas
						Otu0104	2.97722	5.12791	1.77859	2.88313	0.00393743	0.00972778	T33 ICN vs Protected Site Tahala	Rhodobacteraceae	Marivita
						Otu0107	1.99737	4.54701	1.93405	2.35103	0.0187214	0.0327624	T33 ICN vs Protected Site Tahala	Pseudoalteromonadaceae	Pseudoalteromonas
						Otu0108	2.99822	5.14187	1.99811	2.57337	0.0100713	0.0208904	T33 ICN vs Protected Site Tahala	Cryomorphaceae	Cryomorphaceae_unclassified
						Otu0109	3.08796	5.17011	1.95499	2.64458	0.00817929	0.0177688	T33 ICN vs Protected Site Tahala	Flammeovirgaceae	Roseivirga
						Otu0111	3.16652	5.20023	1.79481	2.89737	0.00376305	0.00948288	T33 ICN vs Protected Site Tahala	Flavobacteriaceae	Winogradskyella
						Otu0114	25.2345	-8.13512	2.25949	-3.60042	0.000317707	0.00138038	T33 ICN vs Protected Site Tahala	Flavobacteriaceae	Flavobacteriaceae_unclassified
						Otu0115	11.8447	7.10834	2.28048	3.11703	0.00182682	0.00548045	T33 ICN vs Protected Site Tahala	Rhodobacteraceae	Roseivivax
						Otu0125	20.1659	-7.81262	1.69877	-4.59898	4.24566e-06	3.82109e-05	T33 ICN vs Protected Site Tahala	Pirellulaceae	Pirellulaceae_unclassified
						Otu0127	18.7569	-6.03072	1.69705	-3.55365	0.000379927	0.00159569	T33 ICN vs Protected Site Tahala	Colwelliaceae	Thalassomonas
						Otu0128	3.06094	4.75686	1.73997	2.73388	0.00625937	0.0143396	T33 ICN vs Protected Site Tahala	Flavobacteriaceae	Winogradskyella
						Otu0129	3.26708	-4.669	1.91995	-2.43183	0.0150228	0.0282518	T33 ICN vs Protected Site Tahala	Microbacteriaceae	Microbacterium
						Otu0130	19.2057	-7.74164	1.99158	-3.88718	0.000101417	0.000580071	T33 ICN vs Protected Site Tahala	Vibrionaceae	Photobacterium
						Otu0132	11.2834	-6.97127	1.78438	-3.90682	9.35173e-05	0.000561104	T33 ICN vs Protected Site Tahala	Cryomorphaceae	Fluviicola
						Otu0133	4.31844	5.65816	2.3531	2.40455	0.0161923	0.0292018	T33 ICN vs Protected Site Tahala	Flavobacteriaceae	Flavobacteriaceae_unclassified
						Otu0140	3.62457	5.39832	2.12028	2.54604	0.0108953	0.022142	T33 ICN vs Protected Site Tahala	Alteromonadaceae	Alteromonas
						Otu0156	2.70857	4.97888	1.91816	2.59565	0.00944108	0.0201623	T33 ICN vs Protected Site Tahala	Kiloniellaceae	Thalassospira
						Otu0161	12.7789	-6.13019	1.7962	-3.41287	0.000642819	0.00238221	T33 ICN vs Protected Site Tahala	Micrococcaceae	Micrococcus
						Otu0172	2.56834	4.88853	2.16884	2.25399	0.024197	0.0395951	T33 ICN vs Protected Site Tahala	Flavobacteriaceae	Polaribacter
						Otu0178	10.7843	-6.90714	2.94941	-2.34187	0.0191874	0.0327976	T33 ICN vs Protected Site Tahala	Methylobacteriaceae	Methylobacterium
						Otu0180	2.22915	4.68278	1.94803	2.40385	0.0162232	0.0292018	T33 ICN vs Protected Site Tahala	Oleiphilaceae	Oleiphilaceae_unclassified
						Otu0184	11.3448	-6.97877	2.23448	-3.12322	0.00178883	0.00548045	T33 ICN vs Protected Site Tahala	SBRH_unclassified	SBRH_unclassified
						Otu0189	7.75769	-6.43399	2.91454	-2.20755	0.0272756	0.0429591	T33 ICN vs Protected Site Tahala	Sphingomonadaceae	Sphingomonas
						Otu0192	2.67901	4.94504	1.816	2.72303	0.00646853	0.0145542	T33 ICN vs Protected Site Tahala	Bacteria_unclassified	Bacteria_unclassified
						Otu0209	12.1452	-7.07904	2.01641	-3.51071	0.000446912	0.00181648	T33 ICN vs Protected Site Tahala	Comamonadaceae	Aquabacterium
						Otu0219	2.01913	4.54628	1.81815	2.5005	0.0124019	0.0244163	T33 ICN vs Protected Site Tahala	Alphaproteobacteria_unclassified	Alphaproteobacteria_unclassified
						Otu0222	9.33701	-6.69845	2.95439	-2.26729	0.0233726	0.0387494	T33 ICN vs Protected Site Tahala	Cryomorphaceae	Fluviicola
						Otu0224	13.9364	-22.7916	2.95433	-7.71464	1.21321e-14	7.6432e-13	T33 ICN vs Protected Site Tahala	Rickettsiales_unclassified	Rickettsiales_unclassified
						Otu0231	5.50824	-4.91755	2.03533	-2.4161	0.0156877	0.0290685	T33 ICN vs Protected Site Tahala	Corynebacteriaceae	Corynebacterium
						Otu0260	4.24826	-5.56772	2.35281	-2.36641	0.0179615	0.0318753	T33 ICN vs Protected Site Tahala	Alteromonadales_unclassified	Alteromonadales_unclassified
						Otu0261	6.0173	-5.05692	2.36244	-2.14055	0.0323103	0.0490494	T33 ICN vs Protected Site Tahala	Sphingomonadaceae	Sphingomonas
						Otu0280	13.6746	-7.24925	2.70285	-2.68208	0.00731668	0.0161737	T33 ICN vs Protected Site Tahala	mitochondria	mitochondria_unclassified
						Otu0286	4.4012	-5.60736	2.39588	-2.34042	0.0192621	0.0327976	T33 ICN vs Protected Site Tahala	Moraxellaceae	Enhydrobacter
						Otu0327	9.3245	-6.69705	2.94077	-2.27731	0.0227677	0.0382497	T33 ICN vs Protected Site Tahala	Aurantimonadaceae	Aurantimonadaceae_unclassified
						Otu0339	2.29505	4.72893	2.18475	2.16452	0.0304244	0.0467497	T33 ICN vs Protected Site Tahala	Halomonadaceae	Halomonas
						Otu0340	10.6502	-6.88716	2.71217	-2.53935	0.0111057	0.0222115	T33 ICN vs Protected Site Tahala	Cytophagaceae	Pontibacter
						Otu0362	6.28502	-6.1241	2.45631	-2.49321	0.0126595	0.0245399	T33 ICN vs Protected Site Tahala	Brevibacteriaceae	Brevibacterium
						Otu0427	3.74099	-5.37485	2.1727	-2.47381	0.0133681	0.0255209	T33 ICN vs Protected Site Tahala	Phyllobacteriaceae	Nitratireductor
						Otu0491	1.87399	-4.37685	1.98073	-2.20971	0.0271251	0.0429591	T33 ICN vs Protected Site Tahala	Cyanobacteria_unclassified	Cyanobacteria_unclassified
						Otu0001	26058.5	-11.3167	1.43922	-7.86304	3.74915e-15	2.38653e-13	T33 ICN vs Exposed Site Tahala	Endozoicimonaceae	Endozoicimonaceae_unclassified
						Otu0003	1741.71	3.97913	1.2543	3.1724	0.00151187	0.00529154	T33 ICN vs Exposed Site Tahala	Alteromonadaceae	Alteromonas
						Otu0004	930.94	2.74602	1.0861	2.52832	0.011461	0.026304	T33 ICN vs Exposed Site Tahala	Alteromonadaceae	Alteromonas
						Otu0005	428.372	11.5861	1.80496	6.41906	1.37117e-10	3.83927e-09	T33 ICN vs Exposed Site Tahala	Flavobacteriaceae	Flavobacteriaceae_unclassified
						Otu0007	198.965	6.87714	1.81299	3.79326	0.000148681	0.000867309	T33 ICN vs Exposed Site Tahala	Rhodobacteraceae	Rhodobacteraceae_unclassified
						Otu0010	198.712	4.61805	1.82561	2.5296	0.0114194	0.026304	T33 ICN vs Exposed Site Tahala	Alteromonadaceae	Alteromonas
						Otu0011	220.559	6.33779	1.79143	3.53785	0.000403407	0.00209174	T33 ICN vs Exposed Site Tahala	Vibrionaceae	Vibrionaceae_unclassified
						Otu0016	34.5666	7.95607	2.16667	3.67203	0.000240631	0.00134754	T33 ICN vs Exposed Site Tahala	Rhodobacteraceae	Rhodobacteraceae_unclassified
						Otu0017	63.5071	8.83295	2.56865	3.43876	0.000584388	0.00262847	T33 ICN vs Exposed Site Tahala	Rhodobacteraceae	Rhodobacteraceae_unclassified
						Otu0020	9.7593	6.1336	1.84025	3.33302	0.000859081	0.00346127	T33 ICN vs Exposed Site Tahala	Saprospiraceae	Saprospira
						Otu0022	64.5364	6.86099	1.9913	3.44548	0.000570057	0.00262847	T33 ICN vs Exposed Site Tahala	Alteromonadaceae	Marinobacter
						Otu0023	78.9691	9.14704	2.63285	3.47419	0.000512391	0.00247361	T33 ICN vs Exposed Site Tahala	Vibrionaceae	Vibrio
						Otu0024	301.888	-5.02016	1.53152	-3.2779	0.00104581	0.00391544	T33 ICN vs Exposed Site Tahala	Bacteriovoracaceae	Bacteriovoracaceae_unclassified
						Otu0026	17.0652	6.9313	1.80155	3.84742	0.000119369	0.000779206	T33 ICN vs Exposed Site Tahala	Pseudoalteromonadaceae	Pseudoalteromonas
						Otu0030	30.4252	7.7718	1.81593	4.27979	1.87066e-05	0.000163683	T33 ICN vs Exposed Site Tahala	Rhodobacteraceae	Anaerospora
						Otu0032	41.9834	8.23395	1.82454	4.51289	6.39503e-06	6.39503e-05	T33 ICN vs Exposed Site Tahala	Flavobacteriaceae	Flavobacteriaceae_unclassified
						Otu0037	15.7979	6.81975	1.77543	3.84118	0.000122447	0.000779206	T33 ICN vs Exposed Site Tahala	Flavobacteriaceae	Flavobacteriaceae_unclassified
						Otu0046	19.0225	7.09134	1.85513	3.82255	0.000132079	0.000803961	T33 ICN vs Exposed Site Tahala	GMDH_unclassified	GMDH_unclassified
						Otu0050	8.96874	6.01527	1.83764	3.27336	0.00106276	0.00391544	T33 ICN vs Exposed Site Tahala	Alteromonadaceae	Glaciecola
						Otu0052	17.2279	6.94495	2.64501	2.62568	0.0086476	0.0212397	T33 ICN vs Exposed Site Tahala	Campylobacteraceae	Arcobacter
						Otu0053	9.93624	6.15072	2.14362	2.86931	0.00411367	0.0115183	T33 ICN vs Exposed Site Tahala	Rhodothermaceae	Rubricoccus
						Otu0057	9.60608	6.11278	2.12403	2.87791	0.00400322	0.0114378	T33 ICN vs Exposed Site Tahala	Flavobacteriaceae	Flavobacteriaceae_unclassified
						Otu0064	114.955	-11.1102	1.87022	-5.94061	2.83958e-09	6.62568e-08	T33 ICN vs Exposed Site Tahala	Flavobacteriaceae	Flavobacterium
						Otu0065	8.88227	5.99678	1.86955	3.20761	0.00133843	0.00480461	T33 ICN vs Exposed Site Tahala	Alteromonadaceae	Glaciecola
						Otu0066	11.5825	6.3694	1.82001	3.49965	0.000465867	0.00232933	T33 ICN vs Exposed Site Tahala	Rhodobacteraceae	Rhodobacteraceae_unclassified
						Otu0071	12.5897	6.47756	1.96844	3.2907	0.000999371	0.00388644	T33 ICN vs Exposed Site Tahala	Vibrionaceae	Vibrio
						Otu0073	7.14369	5.67396	1.81981	3.11788	0.00182158	0.00622004	T33 ICN vs Exposed Site Tahala	Oceanospirillaceae	Oceanospirillum
						Otu0074	7.76622	5.80574	2.4595	2.36054	0.0182485	0.0354831	T33 ICN vs Exposed Site Tahala	Hyphomonadaceae	Hyphomonadaceae_unclassified
						Otu0076	63.325	-10.2518	1.76774	-5.7994	6.65536e-09	1.33107e-07	T33 ICN vs Exposed Site Tahala	Cytophagaceae	Flectobacillus
						Otu0078	67.6725	-10.347	1.81423	-5.70322	1.17563e-08	2.05735e-07	T33 ICN vs Exposed Site Tahala	Oxalobacteraceae	Polynucleobacter
						Otu0084	6.20993	5.48652	1.87227	2.9304	0.00338522	0.0106938	T33 ICN vs Exposed Site Tahala	Hyphomonadaceae	Oceanicaulis
						Otu0087	50.0771	-8.49687	1.73365	-4.90114	9.52827e-07	1.11163e-05	T33 ICN vs Exposed Site Tahala	Propionibacteriaceae	Propionibacterium
						Otu0089	61.549	-10.2064	2.05145	-4.97522	6.51743e-07	8.29491e-06	T33 ICN vs Exposed Site Tahala	Microbacteriaceae	Candidatus_Rhodoluna
						Otu0091	8.98902	6.01676	1.80629	3.33101	0.000865317	0.00346127	T33 ICN vs Exposed Site Tahala	BD-_unclassified	BD-_unclassified
						Otu0096	83.0586	-8.61953	1.59581	-5.40136	6.61364e-08	1.02879e-06	T33 ICN vs Exposed Site Tahala	Alteromonadales_unclassified	Alteromonadales_unclassified
						Otu0098	4.35361	4.97479	2.20451	2.25664	0.0240307	0.0448573	T33 ICN vs Exposed Site Tahala	Hyphomonadaceae	Hyphomonas
						Otu0107	4.92911	5.11612	1.87507	2.7285	0.00636231	0.0174652	T33 ICN vs Exposed Site Tahala	Pseudoalteromonadaceae	Pseudoalteromonas
						Otu0114	34.4959	-9.36827	2.31536	-4.04614	5.20688e-05	0.000398822	T33 ICN vs Exposed Site Tahala	Flavobacteriaceae	Flavobacteriaceae_unclassified
						Otu0125	31.307	-9.23575	1.75513	-5.26213	1.42393e-07	1.9935e-06	T33 ICN vs Exposed Site Tahala	Pirellulaceae	Pirellulaceae_unclassified
						Otu0127	31.6712	-4.55874	1.56899	-2.90552	0.00366645	0.0106938	T33 ICN vs Exposed Site Tahala	Colwelliaceae	Thalassomonas
						Otu0129	21.5199	-8.22205	2.0573	-3.99653	6.42772e-05	0.00044994	T33 ICN vs Exposed Site Tahala	Microbacteriaceae	Microbacterium
						Otu0130	28.4715	-9.09458	2.0477	-4.44136	8.93927e-06	8.34332e-05	T33 ICN vs Exposed Site Tahala	Vibrionaceae	Photobacterium
						Otu0132	17.3242	-8.37884	1.83573	-4.56431	5.01133e-06	5.39682e-05	T33 ICN vs Exposed Site Tahala	Cryomorphaceae	Fluviicola
						Otu0140	3.5508	4.64108	1.85958	2.49577	0.0125685	0.0283804	T33 ICN vs Exposed Site Tahala	Alteromonadaceae	Alteromonas
						Otu0161	18.0681	-7.44526	1.84423	-4.03706	5.41258e-05	0.000398822	T33 ICN vs Exposed Site Tahala	Micrococcaceae	Micrococcus
						Otu0178	14.142	-23.7752	2.98953	-7.95284	1.8229e-15	2.38653e-13	T33 ICN vs Exposed Site Tahala	Methylobacteriaceae	Methylobacterium
						Otu0184	16.8748	-8.33483	2.29977	-3.6242	0.000289852	0.00156074	T33 ICN vs Exposed Site Tahala	SBRH_unclassified	SBRH_unclassified
						Otu0189	10.6874	-23.3922	2.99046	-7.82226	5.1882e-15	2.38653e-13	T33 ICN vs Exposed Site Tahala	Sphingomonadaceae	Sphingomonas
						Otu0190	6.7891	-7.01677	2.7303	-2.56997	0.0101708	0.0245503	T33 ICN vs Exposed Site Tahala	Endozoicimonaceae	Endozoicimonaceae_unclassified
						Otu0192	4.15156	4.8994	1.9142	2.5595	0.0104824	0.0248734	T33 ICN vs Exposed Site Tahala	Bacteria_unclassified	Bacteria_unclassified
						Otu0202	10.6965	-4.77848	2.01282	-2.37402	0.0175954	0.0354831	T33 ICN vs Exposed Site Tahala	Pelagibacteraceae	Pelagibacteraceae_unclassified
						Otu0209	18.9455	-8.50568	2.07948	-4.09029	4.3084e-05	0.000354809	T33 ICN vs Exposed Site Tahala	Comamonadaceae	Aquabacterium
						Otu0222	12.2124	-7.86481	2.9866	-2.63337	0.00845432	0.0212263	T33 ICN vs Exposed Site Tahala	Cryomorphaceae	Fluviicola
						Otu0223	22.6998	-8.76236	2.55369	-3.43126	0.000600792	0.00262847	T33 ICN vs Exposed Site Tahala	Leptospiraceae	Turneriella
						Otu0224	20.2732	-23.275	2.98865	-7.7878	6.81865e-15	2.38653e-13	T33 ICN vs Exposed Site Tahala	Rickettsiales_unclassified	Rickettsiales_unclassified
						Otu0231	9.22864	-7.47239	2.18876	-3.41399	0.000640191	0.00271596	T33 ICN vs Exposed Site Tahala	Corynebacteriaceae	Corynebacterium
						Otu0260	7.57743	-5.33515	2.00904	-2.65557	0.00791745	0.020914	T33 ICN vs Exposed Site Tahala	Alteromonadales_unclassified	Alteromonadales_unclassified
						Otu0261	8.47536	-7.33571	2.74023	-2.67704	0.00742748	0.0199971	T33 ICN vs Exposed Site Tahala	Sphingomonadaceae	Sphingomonas
						Otu0272	5.33577	-6.66602	2.69639	-2.4722	0.0134283	0.0293743	T33 ICN vs Exposed Site Tahala	Erythrobacteraceae	Erythromicrobium
						Otu0280	18.3316	-8.45171	2.78045	-3.03969	0.00236818	0.00771036	T33 ICN vs Exposed Site Tahala	mitochondria	mitochondria_unclassified
						Otu0287	4.86273	-6.54309	2.9411	-2.22471	0.0261009	0.0468478	T33 ICN vs Exposed Site Tahala	Flavobacteriaceae	Flavobacteriaceae_unclassified
						Otu0315	7.55245	-5.40482	2.41551	-2.23755	0.0252504	0.0459099	T33 ICN vs Exposed Site Tahala	Moraxellaceae	Acinetobacter
						Otu0317	4.30733	-6.36377	2.66239	-2.39025	0.0168368	0.0351814	T33 ICN vs Exposed Site Tahala	Chitinophagaceae	Sediminibacterium
						Otu0327	12.2239	-7.86676	2.9866	-2.63402	0.00843803	0.0212263	T33 ICN vs Exposed Site Tahala	Aurantimonadaceae	Aurantimonadaceae_unclassified
						Otu0328	6.97902	-7.05772	2.98738	-2.36251	0.0181515	0.0354831	T33 ICN vs Exposed Site Tahala	Tissierellaceae	Finegoldia
						Otu0340	14.5186	-8.11384	2.79034	-2.90783	0.00363946	0.0106938	T33 ICN vs Exposed Site Tahala	Cytophagaceae	Pontibacter
						Otu0349	7.19315	-7.10382	2.69911	-2.63191	0.00849053	0.0212263	T33 ICN vs Exposed Site Tahala	Flavobacteriaceae	Flavobacterium
						Otu0350	4.31075	-6.35651	2.70977	-2.34577	0.0189878	0.0364149	T33 ICN vs Exposed Site Tahala	Comamonadaceae	Comamonadaceae_unclassified
						Otu0355	2.35744	-5.49808	2.45015	-2.24398	0.0248339	0.0457467	T33 ICN vs Exposed Site Tahala	Corynebacteriaceae	Corynebacterium
						Otu0362	8.35382	-7.31694	2.51426	-2.91018	0.0036122	0.0106938	T33 ICN vs Exposed Site Tahala	Brevibacteriaceae	Brevibacterium
						Otu0387	3.10012	-5.90592	2.37511	-2.48659	0.0128975	0.028661	T33 ICN vs Exposed Site Tahala	Comamonadaceae	Delftia
						Otu0393	5.27632	-6.10848	2.53983	-2.40508	0.0161691	0.034298	T33 ICN vs Exposed Site Tahala	Bradyrhizobiaceae	Bosea
						Otu0427	6.36408	-6.92832	2.24603	-3.0847	0.00203756	0.00679186	T33 ICN vs Exposed Site Tahala	Phyllobacteriaceae	Nitratireductor
						Otu0432	2.75213	-5.71276	2.4156	-2.36495	0.0180326	0.0354831	T33 ICN vs Exposed Site Tahala	ACK-M	ACK-M_unclassified
						Otu0444	3.43785	-6.04415	2.66151	-2.27095	0.0231502	0.0437977	T33 ICN vs Exposed Site Tahala	Cryomorphaceae	Fluviicola
						Otu0459	7.66568	-7.19148	2.9886	-2.40631	0.0161148	0.034298	T33 ICN vs Exposed Site Tahala	Rhizobiaceae	Agrobacterium
						Otu0485	7.12506	-7.08489	2.98749	-2.37152	0.0177153	0.0354831	T33 ICN vs Exposed Site Tahala	Methylophilaceae	Methylotenera
						Otu0491	3.133	-5.90845	2.02763	-2.91397	0.00356862	0.0106938	T33 ICN vs Exposed Site Tahala	Cyanobacteria_unclassified	Cyanobacteria_unclassified
						Otu0001	5712.55	3.11915	1.04874	2.9742	0.00293755	0.0124111	T33 Al Fahal vs Protected Site Tahala	Endozoicimonaceae	Endozoicimonaceae_unclassified
						Otu0002	4301.53	-2.8143	0.940394	-2.99269	0.00276534	0.0124111	T33 Al Fahal vs Protected Site Tahala	Vibrionaceae	Photobacterium
						Otu0003	2194.09	2.56256	0.683525	3.74903	0.000177519	0.00156014	T33 Al Fahal vs Protected Site Tahala	Alteromonadaceae	Alteromonas
						Otu0006	3435.35	29.5728	2.15391	13.7298	6.73066e-43	1.13748e-40	T33 Al Fahal vs Protected Site Tahala	Simkaniaceae	Simkaniaceae_unclassified
						Otu0013	315.356	3.12138	0.986876	3.16289	0.00156209	0.00879979	T33 Al Fahal vs Protected Site Tahala	Endozoicimonaceae	Endozoicimonaceae_unclassified
						Otu0016	292.379	-2.157	0.876947	-2.45966	0.0139067	0.0405213	T33 Al Fahal vs Protected Site Tahala	Rhodobacteraceae	Rhodobacteraceae_unclassified
						Otu0020	67.9988	-3.84441	0.907073	-4.23826	2.25262e-05	0.000346084	T33 Al Fahal vs Protected Site Tahala	Saprospiraceae	Saprospira
						Otu0024	11.8943	6.239	1.47063	4.24239	2.21148e-05	0.000346084	T33 Al Fahal vs Protected Site Tahala	Bacteriovoracaceae	Bacteriovoracaceae_unclassified
						Otu0025	135.434	-2.97973	0.968679	-3.07607	0.00209748	0.0104682	T33 Al Fahal vs Protected Site Tahala	Flavobacteriaceae	Tenacibaculum
						Otu0029	46.7148	-5.30582	1.16274	-4.56319	5.03811e-06	0.00010643	T33 Al Fahal vs Protected Site Tahala	Vibrionaceae	Vibrio
						Otu0030	38.2141	3.06783	0.833111	3.68237	0.000231072	0.00177506	T33 Al Fahal vs Protected Site Tahala	Rhodobacteraceae	Anaerospora
						Otu0032	51.9444	6.87081	1.10284	6.23012	4.6608e-10	1.57535e-08	T33 Al Fahal vs Protected Site Tahala	Flavobacteriaceae	Flavobacteriaceae_unclassified
						Otu0033	66.239	-6.01841	1.08644	-5.53957	3.03213e-08	8.5405e-07	T33 Al Fahal vs Protected Site Tahala	Rhodobacteraceae	Ruegeria
						Otu0034	41.3249	3.76244	1.02061	3.68646	0.000227399	0.00177506	T33 Al Fahal vs Protected Site Tahala	Endozoicimonaceae	Endozoicimonaceae_unclassified
						Otu0036	148.424	-9.25827	1.37762	-6.72049	1.81119e-11	7.65228e-10	T33 Al Fahal vs Protected Site Tahala	Vibrionaceae	Photobacterium
						Otu0042	103.793	-25.4989	2.52788	-10.0871	6.30305e-24	5.32608e-22	T33 Al Fahal vs Protected Site Tahala	Clostridiales_unclassified	Clostridiales_unclassified
						Otu0045	35.2001	-2.92409	1.18255	-2.4727	0.0134095	0.0405213	T33 Al Fahal vs Protected Site Tahala	Alteromonadales_unclassified	Alteromonadales_unclassified
						Otu0046	19.0501	2.4667	0.816851	3.01977	0.00252969	0.0118755	T33 Al Fahal vs Protected Site Tahala	GMDH_unclassified	GMDH_unclassified
						Otu0048	30.1	-2.18082	0.729942	-2.98767	0.00281116	0.0124111	T33 Al Fahal vs Protected Site Tahala	Idiomarinaceae	Idiomarina
						Otu0049	10.267	-6.32576	1.98912	-3.18017	0.00147188	0.00857752	T33 Al Fahal vs Protected Site Tahala	Campylobacteraceae	Arcobacter
						Otu0051	4.46919	3.26847	1.25686	2.60051	0.00930853	0.0314628	T33 Al Fahal vs Protected Site Tahala	Rhodobacteraceae	Nautella
						Otu0052	19.7419	-7.73448	1.85821	-4.16233	3.15012e-05	0.000409516	T33 Al Fahal vs Protected Site Tahala	Campylobacteraceae	Arcobacter
						Otu0053	7.78831	6.4939	1.40609	4.6184	3.86714e-06	9.33639e-05	T33 Al Fahal vs Protected Site Tahala	Rhodothermaceae	Rubricoccus
						Otu0058	8.07364	-6.45318	1.94554	-3.31691	0.000910203	0.00549372	T33 Al Fahal vs Protected Site Tahala	Clostridiaceae	Caldanaerocella
						Otu0061	13.5961	-6.73496	1.72476	-3.90488	9.42731e-05	0.00100976	T33 Al Fahal vs Protected Site Tahala	Ferrimonadaceae	Ferrimonas
						Otu0062	24.815	-2.14467	0.818308	-2.62086	0.00877095	0.0302508	T33 Al Fahal vs Protected Site Tahala	Alteromonadaceae	Glaciecola
						Otu0065	10.7725	3.93243	1.03988	3.78161	0.000155816	0.00146294	T33 Al Fahal vs Protected Site Tahala	Alteromonadaceae	Glaciecola
						Otu0066	11.3187	4.67855	1.3751	3.40234	0.00066811	0.00451643	T33 Al Fahal vs Protected Site Tahala	Rhodobacteraceae	Rhodobacteraceae_unclassified
						Otu0067	11.1483	-3.7892	1.36481	-2.77635	0.00549729	0.0206454	T33 Al Fahal vs Protected Site Tahala	Flavobacteriaceae	Tenacibaculum
						Otu0081	23.0258	-7.95958	2.04013	-3.9015	9.55984e-05	0.00100976	T33 Al Fahal vs Protected Site Tahala	Acidaminobacteraceae	Fusibacter
						Otu0091	12.5254	4.60462	1.0371	4.43992	8.99919e-06	0.000168985	T33 Al Fahal vs Protected Site Tahala	BD-_unclassified	BD-_unclassified
						Otu0100	25.6232	6.87645	1.83903	3.73917	0.000184632	0.00156014	T33 Al Fahal vs Protected Site Tahala	Leptospiraceae	Leptospira
						Otu0104	3.43451	3.92036	1.45365	2.69691	0.00699869	0.0246412	T33 Al Fahal vs Protected Site Tahala	Rhodobacteraceae	Marivita
						Otu0108	3.27451	5.26765	1.70487	3.08976	0.00200317	0.0104682	T33 Al Fahal vs Protected Site Tahala	Cryomorphaceae	Cryomorphaceae_unclassified
						Otu0115	8.03658	5.17747	1.89016	2.73917	0.00615945	0.0226293	T33 Al Fahal vs Protected Site Tahala	Rhodobacteraceae	Roseivivax
						Otu0120	14.6783	-7.3111	1.92869	-3.7907	0.000150223	0.00146294	T33 Al Fahal vs Protected Site Tahala	Rhodobacteraceae	Rhodobacteraceae_unclassified
						Otu0121	6.1984	-2.61438	1.07857	-2.42394	0.0153531	0.0439776	T33 Al Fahal vs Protected Site Tahala	Oceanospirillaceae	Oceanospirillaceae_unclassified
						Otu0122	11.1846	-4.45589	1.54058	-2.89234	0.00382386	0.0157046	T33 Al Fahal vs Protected Site Tahala	Oceanospirillaceae	Oceanospirillaceae_unclassified
						Otu0123	19.5898	-5.29826	1.32057	-4.01212	6.01769e-05	0.000726421	T33 Al Fahal vs Protected Site Tahala	Oceanospirillaceae	Neptunomonas
						Otu0127	6.14369	-4.14487	1.43995	-2.87849	0.00399584	0.0157046	T33 Al Fahal vs Protected Site Tahala	Colwelliaceae	Thalassomonas
						Otu0133	5.58882	6.01857	2.10289	2.86204	0.00420925	0.0161673	T33 Al Fahal vs Protected Site Tahala	Flavobacteriaceae	Flavobacteriaceae_unclassified
						Otu0146	14.2418	-22.8394	2.78364	-8.20484	2.30891e-16	1.30068e-14	T33 Al Fahal vs Protected Site Tahala	Vibrionaceae	Vibrionaceae_unclassified
						Otu0150	6.26083	-4.92305	1.60731	-3.06292	0.00219191	0.0105838	T33 Al Fahal vs Protected Site Tahala	Acidaminobacteraceae	Fusibacter
						Otu0151	7.34763	-5.84522	1.74833	-3.34332	0.000827818	0.00518153	T33 Al Fahal vs Protected Site Tahala	Alteromonadales_unclassified	Alteromonadales_unclassified
						Otu0153	15.6124	-7.39893	1.76746	-4.1862	2.83667e-05	0.000399498	T33 Al Fahal vs Protected Site Tahala	Flammeovirgaceae	Persicobacter
						Otu0156	2.72346	4.53966	1.47638	3.07486	0.00210602	0.0104682	T33 Al Fahal vs Protected Site Tahala	Kiloniellaceae	Thalassospira
						Otu0162	7.38918	-2.94848	1.16491	-2.53107	0.0113715	0.0376819	T33 Al Fahal vs Protected Site Tahala	BD-_unclassified	BD-_unclassified
						Otu0169	16.9775	-7.06232	2.0506	-3.44403	0.000573117	0.0040357	T33 Al Fahal vs Protected Site Tahala	Gammaproteobacteria_unclassified	Gammaproteobacteria_unclassified
						Otu0185	4.31057	-4.2975	1.74531	-2.46232	0.0138043	0.0405213	T33 Al Fahal vs Protected Site Tahala	Colwelliaceae	Thalassomonas
						Otu0192	3.2216	3.18636	1.29036	2.46936	0.0135357	0.0405213	T33 Al Fahal vs Protected Site Tahala	Bacteria_unclassified	Bacteria_unclassified
						Otu0196	10.1227	-6.77146	1.95709	-3.45997	0.000540231	0.00396953	T33 Al Fahal vs Protected Site Tahala	Flammeovirgaceae	Flammeovirga
						Otu0219	2.30205	4.69606	1.52035	3.08881	0.00200962	0.0104682	T33 Al Fahal vs Protected Site Tahala	Alphaproteobacteria_unclassified	Alphaproteobacteria_unclassified
						Otu0227	1.45349	-3.96473	1.67058	-2.37326	0.0176317	0.0488484	T33 Al Fahal vs Protected Site Tahala	Alphaproteobacteria_unclassified	Alphaproteobacteria_unclassified
						Otu0228	1.73944	3.84942	1.41394	2.72249	0.00647927	0.0232978	T33 Al Fahal vs Protected Site Tahala	Marinicellaceae	Marinicellaceae_unclassified
						Otu0234	10.9933	-6.88954	2.03693	-3.38231	0.000718792	0.00467215	T33 Al Fahal vs Protected Site Tahala	Flammeovirgaceae	Flammeovirga
						Otu0270	2.33809	-3.80736	1.5217	-2.50204	0.0123479	0.0386443	T33 Al Fahal vs Protected Site Tahala	Rhodobacteraceae	Rhodobacteraceae_unclassified
						Otu0299	2.29488	-4.63535	1.84868	-2.50738	0.012163	0.0386443	T33 Al Fahal vs Protected Site Tahala	Bacteria_unclassified	Bacteria_unclassified
						Otu0307	1.35297	-3.85045	1.53051	-2.51579	0.0118765	0.0385987	T33 Al Fahal vs Protected Site Tahala	Flammeovirgaceae	Roseivirga
						Otu0311	4.67058	-5.16785	1.73751	-2.97429	0.00293665	0.0124111	T33 Al Fahal vs Protected Site Tahala	Flavobacteriaceae	Winogradskyella
						Otu0374	3.92488	-5.40268	1.8733	-2.88405	0.00392602	0.0157046	T33 Al Fahal vs Protected Site Tahala	Alteromonadales_unclassified	Alteromonadales_unclassified
						Otu0412	3.3952	-5.18854	2.17127	-2.38964	0.016865	0.0475031	T33 Al Fahal vs Protected Site Tahala	Fusobacteriaceae	Propionigenium
						Otu0001	817.604	6.01752	1.28907	4.66812	3.03964e-06	0.000144889	T33 Al Fahal vs Exposed Site Tahala	Endozoicimonaceae	Endozoicimonaceae_unclassified
						Otu0003	2625.75	-2.46478	0.826887	-2.98079	0.00287507	0.0205567	T33 Al Fahal vs Exposed Site Tahala	Alteromonadaceae	Alteromonas
						Otu0022	107.672	-3.3092	1.30174	-2.54214	0.0110177	0.0440014	T33 Al Fahal vs Exposed Site Tahala	Alteromonadaceae	Marinobacter
						Otu0024	12.9811	-5.98736	1.82756	-3.27614	0.00105235	0.0100324	T33 Al Fahal vs Exposed Site Tahala	Bacteriovoracaceae	Bacteriovoracaceae_unclassified
						Otu0029	63.9621	3.50784	1.05957	3.31061	0.000930924	0.00952056	T33 Al Fahal vs Exposed Site Tahala	Vibrionaceae	Vibrio
						Otu0030	51.5274	-3.09965	1.0881	-2.84868	0.00439015	0.0272953	T33 Al Fahal vs Exposed Site Tahala	Rhodobacteraceae	Anaerospora
						Otu0032	61.6455	-6.75998	1.29094	-5.23648	1.63667e-07	1.17022e-05	T33 Al Fahal vs Exposed Site Tahala	Flavobacteriaceae	Flavobacteriaceae_unclassified
						Otu0033	94.0668	3.90307	1.53649	2.54025	0.0110773	0.0440014	T33 Al Fahal vs Exposed Site Tahala	Rhodobacteraceae	Ruegeria
						Otu0042	130.511	25.3166	2.50639	10.1009	5.47642e-24	7.83128e-22	T33 Al Fahal vs Exposed Site Tahala	Clostridiales_unclassified	Clostridiales_unclassified
						Otu0046	30.5416	-2.9339	1.01706	-2.88467	0.00391821	0.0257933	T33 Al Fahal vs Exposed Site Tahala	GMDH_unclassified	GMDH_unclassified
						Otu0048	38.1758	2.24729	0.905012	2.48316	0.0130223	0.0487356	T33 Al Fahal vs Exposed Site Tahala	Idiomarinaceae	Idiomarina
						Otu0053	13.7382	-6.95258	1.88015	-3.69789	0.000217402	0.00388606	T33 Al Fahal vs Exposed Site Tahala	Rhodothermaceae	Rubricoccus
						Otu0058	9.01547	6.84875	2.01271	3.40276	0.0006671	0.00794961	T33 Al Fahal vs Exposed Site Tahala	Clostridiaceae	Caldanaerocella
						Otu0061	17.8209	6.8421	1.90267	3.59606	0.000323079	0.00513337	T33 Al Fahal vs Exposed Site Tahala	Ferrimonadaceae	Ferrimonas
						Otu0065	13.15	-3.97685	1.20137	-3.31026	0.000932083	0.00952056	T33 Al Fahal vs Exposed Site Tahala	Alteromonadaceae	Glaciecola
						Otu0066	17.6711	-4.93821	1.38863	-3.55616	0.000376308	0.00538121	T33 Al Fahal vs Exposed Site Tahala	Rhodobacteraceae	Rhodobacteraceae_unclassified
						Otu0081	31.8229	8.66155	2.11726	4.09092	4.29665e-05	0.00122884	T33 Al Fahal vs Exposed Site Tahala	Acidaminobacteraceae	Fusibacter
						Otu0091	15.4737	-4.62298	1.21588	-3.80216	0.000143443	0.00341872	T33 Al Fahal vs Exposed Site Tahala	BD-_unclassified	BD-_unclassified
						Otu0108	6.22748	-5.82008	2.14752	-2.71014	0.0067255	0.0343481	T33 Al Fahal vs Exposed Site Tahala	Cryomorphaceae	Cryomorphaceae_unclassified
						Otu0123	25.6991	5.34705	1.44366	3.70382	0.000212378	0.00388606	T33 Al Fahal vs Exposed Site Tahala	Oceanospirillaceae	Neptunomonas
						Otu0136	4.40415	5.80227	2.19666	2.6414	0.00825642	0.0393556	T33 Al Fahal vs Exposed Site Tahala	Endozoicimonaceae	Endozoicimonaceae_unclassified
						Otu0150	7.90196	6.19163	1.75743	3.52312	0.000426494	0.00554442	T33 Al Fahal vs Exposed Site Tahala	Acidaminobacteraceae	Fusibacter
						Otu0151	10.738	3.84311	1.55223	2.47586	0.0132915	0.0487356	T33 Al Fahal vs Exposed Site Tahala	Alteromonadales_unclassified	Alteromonadales_unclassified
						Otu0153	19.8288	7.97958	1.8783	4.2483	2.15401e-05	0.00077006	T33 Al Fahal vs Exposed Site Tahala	Flammeovirgaceae	Persicobacter
						Otu0156	3.38347	-4.50949	1.65132	-2.73085	0.00631717	0.0343481	T33 Al Fahal vs Exposed Site Tahala	Kiloniellaceae	Thalassospira
						Otu0192	6.76401	-4.05738	1.47482	-2.7511	0.00593951	0.0343481	T33 Al Fahal vs Exposed Site Tahala	Bacteria_unclassified	Bacteria_unclassified
						Otu0194	3.89378	5.62973	1.95431	2.88068	0.0039682	0.0257933	T33 Al Fahal vs Exposed Site Tahala	Rhodobacteraceae	Dinoroseobacter
						Otu0196	13.6115	6.43013	2.04379	3.14617	0.00165422	0.0147846	T33 Al Fahal vs Exposed Site Tahala	Flammeovirgaceae	Flammeovirga
						Otu0214	3.07102	-4.77849	1.82795	-2.61412	0.00894579	0.0401516	T33 Al Fahal vs Exposed Site Tahala	GMDH_unclassified	GMDH_unclassified
						Otu0219	2.61008	-4.53117	1.66991	-2.71343	0.00665916	0.0343481	T33 Al Fahal vs Exposed Site Tahala	Alphaproteobacteria_unclassified	Alphaproteobacteria_unclassified
						Otu0228	3.3005	-4.44186	1.63231	-2.72121	0.00650438	0.0343481	T33 Al Fahal vs Exposed Site Tahala	Marinicellaceae	Marinicellaceae_unclassified
						Otu0234	14.1828	6.4888	2.09477	3.09761	0.00195087	0.0164103	T33 Al Fahal vs Exposed Site Tahala	Flammeovirgaceae	Flammeovirga
						Otu0270	3.31448	4.39168	1.68094	2.61263	0.00898496	0.0401516	T33 Al Fahal vs Exposed Site Tahala	Rhodobacteraceae	Rhodobacteraceae_unclassified
						Otu0299	3.08151	5.29186	1.96609	2.69157	0.00711167	0.0350679	T33 Al Fahal vs Exposed Site Tahala	Bacteria_unclassified	Bacteria_unclassified
						Otu0311	5.97319	5.75917	1.87575	3.07032	0.00213827	0.0169873	T33 Al Fahal vs Exposed Site Tahala	Flavobacteriaceae	Winogradskyella
						Otu0374	5.2042	6.04588	1.9821	3.05025	0.00228653	0.0172092	T33 Al Fahal vs Exposed Site Tahala	Alteromonadales_unclassified	Alteromonadales_unclassified
						Otu0410	3.32249	5.39298	2.07932	2.59363	0.00949697	0.0411535	T33 Al Fahal vs Exposed Site Tahala	Rhodobacteraceae	Rhodobacteraceae_unclassified
						Otu0412	4.33535	5.27621	2.12256	2.48578	0.0129267	0.0487356	T33 Al Fahal vs Exposed Site Tahala	Fusobacteriaceae	Propionigenium
						Otu0458	2.76108	5.12666	2.01572	2.54334	0.0109799	0.0440014	T33 Al Fahal vs Exposed Site Tahala	Flavobacteriaceae	Psychroserpens
						Otu0001	5452.9	9.11106	1.28099	7.1125	1.13958e-12	3.53031e-10	T33 Exposed Site Tahala vs Protected Site Tahala	Endozoicimonaceae	Endozoicimonaceae_unclassified
						Otu0006	3577.69	10.8756	1.53125	7.10243	1.2258e-12	3.53031e-10	T33 Exposed Site Tahala vs Protected Site Tahala	Simkaniaceae	Simkaniaceae_unclassified
						Otu0100	27.4922	8.6271	1.93393	4.46091	8.1612e-06	0.00156695	T33 Exposed Site Tahala vs Protected Site Tahala	Leptospiraceae	Leptospira
						Otu0001	380.481	4.94227	0.817746	6.04377	1.50555e-09	1.86312e-08	T36 ICN vs Al Fahal	Endozoicimonaceae	Endozoicimonaceae_unclassified
						Otu0003	402.058	3.74254	0.664908	5.62866	1.81619e-08	1.89266e-07	T36 ICN vs Al Fahal	Alteromonadaceae	Alteromonas
						Otu0004	1116.36	5.22301	0.631096	8.27609	1.27282e-16	5.04035e-15	T36 ICN vs Al Fahal	Alteromonadaceae	Alteromonas
						Otu0005	420.778	10.6664	1.07776	9.89685	4.29583e-23	8.50575e-21	T36 ICN vs Al Fahal	Flavobacteriaceae	Flavobacteriaceae_unclassified
						Otu0008	1888.4	-3.31405	0.65659	-5.04737	4.47931e-07	3.69543e-06	T36 ICN vs Al Fahal	Rhodobacteraceae	Nautella
						Otu0010	130.022	7.45259	0.89481	8.32868	8.1752e-17	4.04672e-15	T36 ICN vs Al Fahal	Alteromonadaceae	Alteromonas
						Otu0012	456.102	-3.4256	0.818025	-4.18764	2.81866e-05	0.000143101	T36 ICN vs Al Fahal	Flavobacteriaceae	Tenacibaculum
						Otu0013	24.0458	8.00795	1.78627	4.48305	7.35832e-06	4.42479e-05	T36 ICN vs Al Fahal	Endozoicimonaceae	Endozoicimonaceae_unclassified
						Otu0016	251.23	7.48239	1.07847	6.93797	3.97785e-12	7.87614e-11	T36 ICN vs Al Fahal	Rhodobacteraceae	Rhodobacteraceae_unclassified
						Otu0017	52.5046	7.30171	1.01151	7.21862	5.25162e-13	1.29977e-11	T36 ICN vs Al Fahal	Rhodobacteraceae	Rhodobacteraceae_unclassified
						Otu0020	409.725	12.5137	1.35796	9.21507	3.11086e-20	2.05317e-18	T36 ICN vs Al Fahal	Saprospiraceae	Saprospira
						Otu0022	16.6991	7.89838	1.28791	6.13271	8.63923e-10	1.14038e-08	T36 ICN vs Al Fahal	Alteromonadaceae	Marinobacter
						Otu0024	60.9606	-8.50789	1.05545	-8.06089	7.57387e-16	2.49938e-14	T36 ICN vs Al Fahal	Bacteriovoracaceae	Bacteriovoracaceae_unclassified
						Otu0026	70.8396	6.46444	1.13109	5.71525	1.09544e-08	1.27587e-07	T36 ICN vs Al Fahal	Pseudoalteromonadaceae	Pseudoalteromonas
						Otu0027	289.361	-11.6007	1.22737	-9.4517	3.3338e-21	3.30046e-19	T36 ICN vs Al Fahal	Vibrionaceae	Photobacterium
						Otu0028	70.2548	-3.33958	0.828209	-4.03229	5.52361e-05	0.000254343	T36 ICN vs Al Fahal	Rhodobacteraceae	Shimia
						Otu0030	3.49542	5.65494	1.4867	3.80369	0.000142557	0.000564525	T36 ICN vs Al Fahal	Rhodobacteraceae	Anaerospora
						Otu0031	2.64585	-4.83728	1.79107	-2.70078	0.00691768	0.0161141	T36 ICN vs Al Fahal	Cohaesibacteraceae	Cohaesibacter
						Otu0033	37.9411	1.78356	0.762485	2.33913	0.0193285	0.0393528	T36 ICN vs Al Fahal	Rhodobacteraceae	Ruegeria
						Otu0034	1.90001	4.77833	2.03566	2.34731	0.0189094	0.0390006	T36 ICN vs Al Fahal	Endozoicimonaceae	Endozoicimonaceae_unclassified
						Otu0036	89.3076	8.30527	1.27757	6.50083	7.98754e-11	1.31794e-09	T36 ICN vs Al Fahal	Vibrionaceae	Photobacterium
						Otu0037	32.6484	7.59462	1.16694	6.50813	7.60904e-11	1.31794e-09	T36 ICN vs Al Fahal	Flavobacteriaceae	Flavobacteriaceae_unclassified
						Otu0039	17.5558	2.11773	0.906461	2.33626	0.0194777	0.0393528	T36 ICN vs Al Fahal	Pseudoalteromonadaceae	Pseudoalteromonas
						Otu0042	5.93089	-4.46664	1.58851	-2.81183	0.00492598	0.0126668	T36 ICN vs Al Fahal	Clostridiales_unclassified	Clostridiales_unclassified
						Otu0046	17.8962	8.00331	1.2738	6.28303	3.32037e-10	4.69594e-09	T36 ICN vs Al Fahal	GMDH_unclassified	GMDH_unclassified
						Otu0048	25.1302	8.48933	1.32324	6.41557	1.40295e-10	2.1368e-09	T36 ICN vs Al Fahal	Idiomarinaceae	Idiomarina
						Otu0050	7.41316	6.73381	1.44255	4.66798	3.04178e-06	2.0768e-05	T36 ICN vs Al Fahal	Alteromonadaceae	Glaciecola
						Otu0051	96.3087	-5.72911	0.810112	-7.072	1.52721e-12	3.35986e-11	T36 ICN vs Al Fahal	Rhodobacteraceae	Nautella
						Otu0057	5.2269	6.23375	1.27184	4.90138	9.51663e-07	7.24728e-06	T36 ICN vs Al Fahal	Flavobacteriaceae	Flavobacteriaceae_unclassified
						Otu0058	101.558	10.5006	2.06258	5.09102	3.56144e-07	3.06593e-06	T36 ICN vs Al Fahal	Clostridiaceae	Caldanaerocella
						Otu0062	25.0013	6.12482	1.10622	5.53672	3.08197e-08	3.05115e-07	T36 ICN vs Al Fahal	Alteromonadaceae	Glaciecola
						Otu0064	3.79226	-5.34955	1.51485	-3.53141	0.000413358	0.00151565	T36 ICN vs Al Fahal	Flavobacteriaceae	Flavobacterium
						Otu0066	0.968261	3.80173	1.59001	2.39101	0.0168019	0.0353912	T36 ICN vs Al Fahal	Rhodobacteraceae	Rhodobacteraceae_unclassified
						Otu0073	4.32316	3.47473	1.26	2.75772	0.00582055	0.014228	T36 ICN vs Al Fahal	Oceanospirillaceae	Oceanospirillum
						Otu0074	1.57756	4.48796	1.5065	2.97906	0.00289132	0.00817829	T36 ICN vs Al Fahal	Hyphomonadaceae	Hyphomonadaceae_unclassified
						Otu0076	3.04002	-5.03051	1.74644	-2.88043	0.00397129	0.0107795	T36 ICN vs Al Fahal	Cytophagaceae	Flectobacillus
						Otu0078	5.08763	-5.77209	1.85374	-3.11376	0.00184721	0.0054618	T36 ICN vs Al Fahal	Oxalobacteraceae	Polynucleobacter
						Otu0080	13.1945	7.56095	1.79747	4.20644	2.59431e-05	0.000135177	T36 ICN vs Al Fahal	Oceanospirillaceae	Marinomonas
						Otu0081	35.7441	8.99265	2.04689	4.39332	1.11634e-05	6.50104e-05	T36 ICN vs Al Fahal	Acidaminobacteraceae	Fusibacter
						Otu0084	2.4288	5.14239	1.51997	3.38321	0.00071643	0.00240429	T36 ICN vs Al Fahal	Hyphomonadaceae	Oceanicaulis
						Otu0087	4.24588	-3.50803	1.28186	-2.73667	0.00620652	0.0149865	T36 ICN vs Al Fahal	Propionibacteriaceae	Propionibacterium
						Otu0089	3.50595	-5.2356	1.51184	-3.46306	0.000534076	0.00185521	T36 ICN vs Al Fahal	Microbacteriaceae	Candidatus_Rhodoluna
						Otu0090	5.20507	4.11294	1.15626	3.5571	0.000374972	0.00142778	T36 ICN vs Al Fahal	Pseudoalteromonadaceae	Pseudoalteromonas
						Otu0092	85.603	10.2544	2.17508	4.7145	2.42305e-06	1.7396e-05	T36 ICN vs Al Fahal	Peptostreptococcaceae	Tepidibacter
						Otu0095	52.5214	-9.13816	1.20748	-7.56795	3.79156e-14	1.07247e-12	T36 ICN vs Al Fahal	Proteobacteria_unclassified	Proteobacteria_unclassified
						Otu0096	4.88778	-4.12565	1.07117	-3.85155	0.000117372	0.000494459	T36 ICN vs Al Fahal	Alteromonadales_unclassified	Alteromonadales_unclassified
						Otu0097	10.1021	7.16519	1.34156	5.34093	9.24687e-08	8.71847e-07	T36 ICN vs Al Fahal	BD-_unclassified	BD-_unclassified
						Otu0102	45.6058	9.34517	2.27133	4.1144	3.88192e-05	0.000192155	T36 ICN vs Al Fahal	Clostridiaceae	Clostridiaceae_unclassified
						Otu0106	66.1002	9.99515	2.18097	4.58289	4.5859e-06	2.92906e-05	T36 ICN vs Al Fahal	Vibrionaceae	Photobacterium
						Otu0107	4.58475	6.00977	1.37131	4.38249	1.17329e-05	6.63748e-05	T36 ICN vs Al Fahal	Pseudoalteromonadaceae	Pseudoalteromonas
						Otu0109	3.87702	5.77167	1.24844	4.62311	3.78033e-06	2.49502e-05	T36 ICN vs Al Fahal	Flammeovirgaceae	Roseivirga
						Otu0114	1.41133	-3.92262	1.65669	-2.36775	0.0178964	0.0372999	T36 ICN vs Al Fahal	Flavobacteriaceae	Flavobacteriaceae_unclassified
						Otu0120	13.9247	-2.59825	0.915354	-2.83852	0.0045323	0.0118078	T36 ICN vs Al Fahal	Rhodobacteraceae	Rhodobacteraceae_unclassified
						Otu0121	6.36681	5.18742	1.5794	3.28443	0.00102188	0.0033722	T36 ICN vs Al Fahal	Oceanospirillaceae	Oceanospirillaceae_unclassified
						Otu0125	1.32688	-3.83434	1.41906	-2.70203	0.00689179	0.0161141	T36 ICN vs Al Fahal	Pirellulaceae	Pirellulaceae_unclassified
						Otu0130	1.62364	-4.12466	1.70716	-2.41609	0.0156883	0.0334008	T36 ICN vs Al Fahal	Vibrionaceae	Photobacterium
						Otu0137	15.8105	-3.1925	0.832171	-3.83635	0.000124875	0.000515108	T36 ICN vs Al Fahal	Rhodobacteraceae	Nautella
						Otu0138	18.3824	-5.8927	1.11948	-5.26378	1.41122e-07	1.2701e-06	T36 ICN vs Al Fahal	Proteobacteria_unclassified	Proteobacteria_unclassified
						Otu0142	1.62371	4.55706	1.45844	3.12461	0.00178041	0.00542339	T36 ICN vs Al Fahal	Endozoicimonaceae	Endozoicimonaceae_unclassified
						Otu0143	4.77193	4.08663	1.31251	3.1136	0.00184818	0.0054618	T36 ICN vs Al Fahal	Vibrionaceae	Photobacterium
						Otu0150	1.76997	4.65984	1.51798	3.06975	0.00214238	0.00622579	T36 ICN vs Al Fahal	Acidaminobacteraceae	Fusibacter
						Otu0151	9.18876	-3.29537	0.96803	-3.4042	0.000663579	0.00226532	T36 ICN vs Al Fahal	Alteromonadales_unclassified	Alteromonadales_unclassified
						Otu0153	5.75482	6.34658	1.81817	3.49063	0.00048188	0.00170379	T36 ICN vs Al Fahal	Flammeovirgaceae	Persicobacter
						Otu0154	11.5249	-3.32975	0.770865	-4.3195	1.56384e-05	8.36867e-05	T36 ICN vs Al Fahal	Rhodobacteraceae	Rhodobacteraceae_unclassified
						Otu0159	6.65182	-4.89138	1.21018	-4.04186	5.30292e-05	0.000249995	T36 ICN vs Al Fahal	Flavobacteriaceae	Tenacibaculum
						Otu0161	1.79337	-3.40003	1.36126	-2.4977	0.0125	0.0275001	T36 ICN vs Al Fahal	Micrococcaceae	Micrococcus
						Otu0162	4.18554	5.91789	1.36904	4.32267	1.54151e-05	8.36867e-05	T36 ICN vs Al Fahal	BD-_unclassified	BD-_unclassified
						Otu0170	17.2773	-7.53579	1.3322	-5.65665	1.54357e-08	1.69792e-07	T36 ICN vs Al Fahal	Rhodobacteraceae	Rhodobacteraceae_unclassified
						Otu0183	26.7908	8.57761	2.2408	3.82792	0.000129233	0.000522206	T36 ICN vs Al Fahal	Vibrionaceae	Vibrionaceae_unclassified
						Otu0196	3.89355	5.78512	2.02779	2.85292	0.00433196	0.0114364	T36 ICN vs Al Fahal	Flammeovirgaceae	Flammeovirga
						Otu0198	14.1998	7.66149	2.1623	3.54321	0.000395288	0.00147674	T36 ICN vs Al Fahal	Clostridiaceae	Clostridiaceae_unclassified
						Otu0203	1.37062	4.30437	1.55629	2.76579	0.00567856	0.0140544	T36 ICN vs Al Fahal	Flavobacteriaceae	Kordia
						Otu0204	2.10089	4.90247	1.56305	3.13648	0.00170988	0.00528994	T36 ICN vs Al Fahal	Bacteroidetes_unclassified	Bacteroidetes_unclassified
						Otu0227	2.79665	5.31231	1.51986	3.49525	0.000473617	0.00170379	T36 ICN vs Al Fahal	Alphaproteobacteria_unclassified	Alphaproteobacteria_unclassified
						Otu0233	7.53703	-6.33882	1.2826	-4.94216	7.72626e-07	6.11919e-06	T36 ICN vs Al Fahal	Rhodobacteraceae	Rhodobacteraceae_unclassified
						Otu0234	1.84006	4.68115	2.08889	2.24098	0.0250276	0.0495546	T36 ICN vs Al Fahal	Flammeovirgaceae	Flammeovirga
						Otu0241	11.6568	7.37517	2.40549	3.06598	0.00216959	0.00622579	T36 ICN vs Al Fahal	Clostridiaceae	Caloramator
						Otu0243	6.67553	3.8504	1.67623	2.29706	0.0216153	0.0432307	T36 ICN vs Al Fahal	Ferrimonadaceae	Ferrimonas
						Otu0245	7.9845	-6.42178	1.74626	-3.67745	0.000235581	0.00091461	T36 ICN vs Al Fahal	Rhodobacteraceae	Rhodobacteraceae_unclassified
						Otu0248	7.3705	-6.30846	1.40733	-4.48258	7.37465e-06	4.42479e-05	T36 ICN vs Al Fahal	Rhodobacteraceae	Rhodobacteraceae_unclassified
						Otu0250	2.2908	5.05118	1.70888	2.95585	0.0031181	0.00869554	T36 ICN vs Al Fahal	Oceanospirillaceae	Marinomonas
						Otu0254	6.73423	5.24943	1.65843	3.16531	0.0015492	0.00494743	T36 ICN vs Al Fahal	Alteromonadaceae	Alteromonadaceae_unclassified
						Otu0256	6.13536	-6.04452	1.48626	-4.06692	4.7639e-05	0.000230061	T36 ICN vs Al Fahal	BD-_unclassified	BD-_unclassified
						Otu0257	1.48801	4.44102	1.68922	2.62904	0.00856265	0.019266	T36 ICN vs Al Fahal	GMDH_unclassified	GMDH_unclassified
						Otu0260	1.22999	-3.7351	1.52942	-2.44217	0.0145994	0.0314204	T36 ICN vs Al Fahal	Alteromonadales_unclassified	Alteromonadales_unclassified
						Otu0264	5.20845	-5.80887	1.23294	-4.71141	2.46004e-06	1.7396e-05	T36 ICN vs Al Fahal	Alteromonadaceae	BD-
						Otu0265	6.06714	5.57143	2.00764	2.77511	0.00551826	0.0138306	T36 ICN vs Al Fahal	Vibrionaceae	Vibrio
						Otu0274	11.096	7.30606	2.74251	2.66401	0.00772158	0.0177776	T36 ICN vs Al Fahal	Gammaproteobacteria_unclassified	Gammaproteobacteria_unclassified
						Otu0290	6.76885	-6.17846	1.58843	-3.88966	0.000100385	0.000441693	T36 ICN vs Al Fahal	Flavobacteriaceae	Tenacibaculum
						Otu0291	7.23199	-6.27699	2.3786	-2.63894	0.00831657	0.0189274	T36 ICN vs Al Fahal	Vibrionaceae	Vibrio
						Otu0299	2.74409	5.28214	1.63701	3.22671	0.00125223	0.00406461	T36 ICN vs Al Fahal	Bacteria_unclassified	Bacteria_unclassified
						Otu0307	1.87298	4.7526	1.51029	3.14681	0.0016506	0.0051876	T36 ICN vs Al Fahal	Flammeovirgaceae	Roseivirga
						Otu0308	2.07943	4.83315	1.7318	2.79083	0.00525736	0.0133456	T36 ICN vs Al Fahal	Oceanospirillaceae	Oleibacter
						Otu0325	4.16583	-5.05	1.30353	-3.87409	0.000107024	0.000460669	T36 ICN vs Al Fahal	Rhodobacteraceae	Rhodobacteraceae_unclassified
						Otu0342	1.40601	4.33706	1.60398	2.70393	0.00685244	0.0161141	T36 ICN vs Al Fahal	Idiomarinaceae	Pseudidiomarina
						Otu0358	4.1656	-5.48603	1.38653	-3.95667	7.6001e-05	0.000342005	T36 ICN vs Al Fahal	Rhodobacteraceae	Thalassobius
						Otu0370	4.97516	5.27624	2.15757	2.44546	0.0144669	0.0314204	T36 ICN vs Al Fahal	Alteromonadaceae	Glaciecola
						Otu0373	2.97312	5.38867	2.08013	2.59054	0.0095825	0.0213184	T36 ICN vs Al Fahal	Flammeovirgaceae	Flammeovirgaceae_unclassified
						Otu0500	4.81954	6.09208	2.11516	2.8802	0.00397426	0.0107795	T36 ICN vs Al Fahal	Oceanospirillales_unclassified	Oceanospirillales_unclassified
						Otu0541	2.21807	-4.57294	1.59679	-2.86383	0.00418558	0.0111992	T36 ICN vs Al Fahal	Rhodobacteraceae	Rhodobacteraceae_unclassified
						Otu0001	6390.83	9.30508	0.787725	11.8126	3.36025e-32	6.04844e-30	T36 ICN vs Protected Site Tahala	Endozoicimonaceae	Endozoicimonaceae_unclassified
						Otu0002	5261.26	-3.34115	0.625925	-5.33794	9.40078e-08	5.28794e-07	T36 ICN vs Protected Site Tahala	Vibrionaceae	Photobacterium
						Otu0003	2013.24	6.38949	0.619343	10.3166	5.93092e-25	3.55855e-23	T36 ICN vs Protected Site Tahala	Alteromonadaceae	Alteromonas
						Otu0004	1208.66	5.56633	0.576018	9.66348	4.30968e-22	1.55148e-20	T36 ICN vs Protected Site Tahala	Alteromonadaceae	Alteromonas
						Otu0005	622.602	11.4983	1.09575	10.4936	9.24609e-26	8.32148e-24	T36 ICN vs Protected Site Tahala	Flavobacteriaceae	Flavobacteriaceae_unclassified
						Otu0006	2543	13.7692	1.6188	8.50579	1.80365e-17	4.63796e-16	T36 ICN vs Protected Site Tahala	Simkaniaceae	Simkaniaceae_unclassified
						Otu0007	518.634	2.21493	0.665015	3.33065	0.000866424	0.00210752	T36 ICN vs Protected Site Tahala	Rhodobacteraceae	Rhodobacteraceae_unclassified
						Otu0008	1477.23	-4.49711	0.583907	-7.70175	1.34211e-14	2.01316e-13	T36 ICN vs Protected Site Tahala	Rhodobacteraceae	Nautella
						Otu0010	216.871	8.49521	0.84736	10.0255	1.17767e-23	5.29953e-22	T36 ICN vs Protected Site Tahala	Alteromonadaceae	Alteromonas
						Otu0012	430.039	-1.90114	0.804596	-2.36285	0.018135	0.0294081	T36 ICN vs Protected Site Tahala	Flavobacteriaceae	Tenacibaculum
						Otu0013	202.079	11.3099	1.26466	8.94301	3.7871e-19	1.13613e-17	T36 ICN vs Protected Site Tahala	Endozoicimonaceae	Endozoicimonaceae_unclassified
						Otu0016	43.5397	5.38619	1.25803	4.28145	1.85677e-05	6.82079e-05	T36 ICN vs Protected Site Tahala	Rhodobacteraceae	Rhodobacteraceae_unclassified
						Otu0017	81.1772	8.28422	1.26593	6.54397	5.99052e-11	5.13473e-10	T36 ICN vs Protected Site Tahala	Rhodobacteraceae	Rhodobacteraceae_unclassified
						Otu0018	60.1737	2.03165	0.598289	3.39576	0.000684376	0.00173504	T36 ICN vs Protected Site Tahala	Oceanospirillaceae	Oleibacter
						Otu0019	159.268	-1.94127	0.729467	-2.66122	0.00778581	0.014909	T36 ICN vs Protected Site Tahala	Rhodobacteraceae	Rhodobacteraceae_unclassified
						Otu0020	16.1829	8.08408	1.17598	6.87434	6.22764e-12	5.89987e-11	T36 ICN vs Protected Site Tahala	Saprospiraceae	Saprospira
						Otu0022	47.8908	9.64761	1.27197	7.58479	3.33024e-14	4.61111e-13	T36 ICN vs Protected Site Tahala	Alteromonadaceae	Marinobacter
						Otu0025	49.7325	2.2509	0.955512	2.3557	0.0184878	0.0297126	T36 ICN vs Protected Site Tahala	Flavobacteriaceae	Tenacibaculum
						Otu0026	14.0475	4.37689	0.940459	4.65399	3.25571e-06	1.3953e-05	T36 ICN vs Protected Site Tahala	Pseudoalteromonadaceae	Pseudoalteromonas
						Otu0027	249.751	-8.77317	1.07131	-8.1892	2.62966e-16	5.25932e-15	T36 ICN vs Protected Site Tahala	Vibrionaceae	Photobacterium
						Otu0029	104.812	-5.48834	1.1165	-4.91567	8.84794e-07	4.19113e-06	T36 ICN vs Protected Site Tahala	Vibrionaceae	Vibrio
						Otu0030	41.6935	9.44703	1.2034	7.85031	4.14995e-15	6.79083e-14	T36 ICN vs Protected Site Tahala	Rhodobacteraceae	Anaerospora
						Otu0031	2.48169	-4.46944	1.71729	-2.60261	0.00925175	0.0171682	T36 ICN vs Protected Site Tahala	Cohaesibacteraceae	Cohaesibacter
						Otu0032	63.2359	10.0468	1.24321	8.08133	6.4062e-16	1.15312e-14	T36 ICN vs Protected Site Tahala	Flavobacteriaceae	Flavobacteriaceae_unclassified
						Otu0034	52.8665	9.78684	1.18474	8.26074	1.44768e-16	3.25727e-15	T36 ICN vs Protected Site Tahala	Endozoicimonaceae	Endozoicimonaceae_unclassified
						Otu0037	16.8837	6.89646	1.08946	6.33014	2.44938e-10	1.91691e-09	T36 ICN vs Protected Site Tahala	Flavobacteriaceae	Flavobacteriaceae_unclassified
						Otu0038	17.0052	2.67516	0.910496	2.93813	0.00330194	0.00675398	T36 ICN vs Protected Site Tahala	Amoebophilaceae	SGUS
						Otu0039	26.1621	3.02751	0.818893	3.69707	0.000218103	0.000594825	T36 ICN vs Protected Site Tahala	Pseudoalteromonadaceae	Pseudoalteromonas
						Otu0042	4.17857	-5.22639	1.49863	-3.48744	0.000487666	0.00129088	T36 ICN vs Protected Site Tahala	Clostridiales_unclassified	Clostridiales_unclassified
						Otu0046	39.4162	9.36512	1.25863	7.44075	1.00115e-13	1.28719e-12	T36 ICN vs Protected Site Tahala	GMDH_unclassified	GMDH_unclassified
						Otu0048	15.7156	8.04105	1.16621	6.89502	5.38558e-12	5.38558e-11	T36 ICN vs Protected Site Tahala	Idiomarinaceae	Idiomarina
						Otu0049	33.4223	-6.84871	1.20123	-5.70143	1.18809e-08	7.37434e-08	T36 ICN vs Protected Site Tahala	Campylobacteraceae	Arcobacter
						Otu0050	17.4473	8.19091	1.1343	7.22111	5.15666e-13	5.80124e-12	T36 ICN vs Protected Site Tahala	Alteromonadaceae	Glaciecola
						Otu0051	86.2949	-3.81213	0.765824	-4.97782	6.4303e-07	3.21515e-06	T36 ICN vs Protected Site Tahala	Rhodobacteraceae	Nautella
						Otu0052	34.4675	-8.27375	1.15402	-7.16951	7.52689e-13	7.96964e-12	T36 ICN vs Protected Site Tahala	Campylobacteraceae	Arcobacter
						Otu0053	58.7436	9.9409	1.35935	7.31298	2.61276e-13	3.13532e-12	T36 ICN vs Protected Site Tahala	Rhodothermaceae	Rubricoccus
						Otu0057	14.5296	7.91761	1.22217	6.47833	9.27413e-11	7.58793e-10	T36 ICN vs Protected Site Tahala	Flavobacteriaceae	Flavobacteriaceae_unclassified
						Otu0061	48.7603	-6.72145	1.08641	-6.18682	6.13901e-10	4.42009e-09	T36 ICN vs Protected Site Tahala	Ferrimonadaceae	Ferrimonas
						Otu0062	10.8627	5.29002	1.23715	4.27598	1.90302e-05	6.85088e-05	T36 ICN vs Protected Site Tahala	Alteromonadaceae	Glaciecola
						Otu0064	3.35804	-4.90357	1.46152	-3.35512	0.000793302	0.00197623	T36 ICN vs Protected Site Tahala	Flavobacteriaceae	Flavobacterium
						Otu0065	18.1921	8.25611	1.32192	6.24556	4.22285e-10	3.16713e-09	T36 ICN vs Protected Site Tahala	Alteromonadaceae	Glaciecola
						Otu0066	29.6238	8.9525	1.35215	6.62095	3.56906e-11	3.21215e-10	T36 ICN vs Protected Site Tahala	Rhodobacteraceae	Rhodobacteraceae_unclassified
						Otu0067	37.4696	-4.75103	1.04506	-4.54616	5.46328e-06	2.23498e-05	T36 ICN vs Protected Site Tahala	Flavobacteriaceae	Tenacibaculum
						Otu0073	9.61252	4.99257	1.17427	4.25163	2.12217e-05	7.34598e-05	T36 ICN vs Protected Site Tahala	Oceanospirillaceae	Oceanospirillum
						Otu0074	8.49533	7.13962	1.44593	4.93773	7.90353e-07	3.84496e-06	T36 ICN vs Protected Site Tahala	Hyphomonadaceae	Hyphomonadaceae_unclassified
						Otu0076	2.65177	-4.5606	1.66006	-2.74725	0.00600973	0.0116317	T36 ICN vs Protected Site Tahala	Cytophagaceae	Flectobacillus
						Otu0077	5.58015	6.55769	1.21432	5.40031	6.65267e-08	3.86284e-07	T36 ICN vs Protected Site Tahala	BD-_unclassified	BD-_unclassified
						Otu0078	4.27834	-5.2495	1.70545	-3.07807	0.00208345	0.00468776	T36 ICN vs Protected Site Tahala	Oxalobacteraceae	Polynucleobacter
						Otu0080	5.50361	6.53716	1.46611	4.45884	8.24029e-06	3.22446e-05	T36 ICN vs Protected Site Tahala	Oceanospirillaceae	Marinomonas
						Otu0084	2.97479	5.64983	1.40986	4.00736	6.14006e-05	0.000187324	T36 ICN vs Protected Site Tahala	Hyphomonadaceae	Oceanicaulis
						Otu0089	3.05396	-4.76748	1.46964	-3.24398	0.00117874	0.00275549	T36 ICN vs Protected Site Tahala	Microbacteriaceae	Candidatus_Rhodoluna
						Otu0090	5.72089	4.49966	1.07361	4.19117	2.77524e-05	9.2508e-05	T36 ICN vs Protected Site Tahala	Pseudoalteromonadaceae	Pseudoalteromonas
						Otu0091	5.81799	6.61236	1.28723	5.1369	2.79304e-07	1.52348e-06	T36 ICN vs Protected Site Tahala	BD-_unclassified	BD-_unclassified
						Otu0095	47.1001	-3.85068	1.26842	-3.03581	0.00239893	0.00526026	T36 ICN vs Protected Site Tahala	Proteobacteria_unclassified	Proteobacteria_unclassified
						Otu0096	4.44057	-3.25018	1.07179	-3.03248	0.00242556	0.00526026	T36 ICN vs Protected Site Tahala	Alteromonadales_unclassified	Alteromonadales_unclassified
						Otu0097	2.41497	5.32183	2.36164	2.25345	0.024231	0.0375998	T36 ICN vs Protected Site Tahala	BD-_unclassified	BD-_unclassified
						Otu0098	6.87237	6.83747	1.19781	5.7083	1.14112e-08	7.33579e-08	T36 ICN vs Protected Site Tahala	Hyphomonadaceae	Hyphomonas
						Otu0100	19.201	8.32682	1.83904	4.5278	5.96019e-06	2.38407e-05	T36 ICN vs Protected Site Tahala	Leptospiraceae	Leptospira
						Otu0104	14.5445	7.92458	1.2851	6.16649	6.98218e-10	4.83382e-09	T36 ICN vs Protected Site Tahala	Rhodobacteraceae	Marivita
						Otu0107	1.41363	4.60393	1.85885	2.47676	0.0132581	0.0233966	T36 ICN vs Protected Site Tahala	Pseudoalteromonadaceae	Pseudoalteromonas
						Otu0108	4.497	6.2505	1.21943	5.12576	2.96342e-07	1.56887e-06	T36 ICN vs Protected Site Tahala	Cryomorphaceae	Cryomorphaceae_unclassified
						Otu0109	9.5117	7.32295	1.25093	5.854	4.79891e-09	3.19927e-08	T36 ICN vs Protected Site Tahala	Flammeovirgaceae	Roseivirga
						Otu0111	5.23944	6.45125	1.34056	4.81237	1.49153e-06	6.88399e-06	T36 ICN vs Protected Site Tahala	Flavobacteriaceae	Winogradskyella
						Otu0113	14.1612	-3.80334	1.14762	-3.31412	0.000919317	0.00220636	T36 ICN vs Protected Site Tahala	Campylobacteraceae	Arcobacter
						Otu0120	12.4798	-3.99799	1.16112	-3.44321	0.000574858	0.00147821	T36 ICN vs Protected Site Tahala	Rhodobacteraceae	Rhodobacteraceae_unclassified
						Otu0121	1.61719	3.34771	1.53334	2.18329	0.0290147	0.0432612	T36 ICN vs Protected Site Tahala	Oceanospirillaceae	Oceanospirillaceae_unclassified
						Otu0122	1.36275	4.50955	1.93665	2.32854	0.0198836	0.0313952	T36 ICN vs Protected Site Tahala	Oceanospirillaceae	Oceanospirillaceae_unclassified
						Otu0125	1.17672	-3.38614	1.49203	-2.26948	0.0232391	0.0363743	T36 ICN vs Protected Site Tahala	Pirellulaceae	Pirellulaceae_unclassified
						Otu0126	4.99989	5.53091	1.35454	4.08325	4.44094e-05	0.00014534	T36 ICN vs Protected Site Tahala	Burkholderiaceae	Burkholderia
						Otu0127	2.86659	-2.62137	1.17016	-2.24019	0.0250786	0.0385825	T36 ICN vs Protected Site Tahala	Colwelliaceae	Thalassomonas
						Otu0128	3.64365	5.9072	1.47269	4.01117	6.04175e-05	0.000187324	T36 ICN vs Protected Site Tahala	Flavobacteriaceae	Winogradskyella
						Otu0130	1.47996	-3.71234	1.7079	-2.17363	0.0297326	0.0438678	T36 ICN vs Protected Site Tahala	Vibrionaceae	Photobacterium
						Otu0133	3.41907	5.82165	1.86794	3.11661	0.00182946	0.0041684	T36 ICN vs Protected Site Tahala	Flavobacteriaceae	Flavobacteriaceae_unclassified
						Otu0135	3.5986	5.90748	1.24766	4.73486	2.19208e-06	9.62378e-06	T36 ICN vs Protected Site Tahala	Hyphomonadaceae	Hyphomonadaceae_unclassified
						Otu0137	12.5194	-4.16934	1.03252	-4.038	5.3908e-05	0.000172615	T36 ICN vs Protected Site Tahala	Rhodobacteraceae	Nautella
						Otu0138	17.2581	-3.1618	1.25872	-2.51192	0.0120078	0.021614	T36 ICN vs Protected Site Tahala	Proteobacteria_unclassified	Proteobacteria_unclassified
						Otu0139	2.64124	5.44299	1.84356	2.95243	0.00315286	0.006599	T36 ICN vs Protected Site Tahala	Hyphomonadaceae	Maricaulis
						Otu0140	4.12994	6.1165	1.61034	3.79826	0.000145713	0.000419588	T36 ICN vs Protected Site Tahala	Alteromonadaceae	Alteromonas
						Otu0142	1.989	5.03695	1.74148	2.89234	0.00382387	0.00764773	T36 ICN vs Protected Site Tahala	Endozoicimonaceae	Endozoicimonaceae_unclassified
						Otu0146	3.16328	-4.80051	1.86236	-2.57765	0.00994742	0.0182708	T36 ICN vs Protected Site Tahala	Vibrionaceae	Vibrionaceae_unclassified
						Otu0151	7.25803	-5.13837	1.11417	-4.61183	3.99141e-06	1.67082e-05	T36 ICN vs Protected Site Tahala	Alteromonadales_unclassified	Alteromonadales_unclassified
						Otu0154	11.7568	-1.57659	0.710934	-2.21763	0.0265798	0.0405455	T36 ICN vs Protected Site Tahala	Rhodobacteraceae	Rhodobacteraceae_unclassified
						Otu0156	4.47662	6.21055	1.21751	5.10103	3.37818e-07	1.73735e-06	T36 ICN vs Protected Site Tahala	Kiloniellaceae	Thalassospira
						Otu0158	5.11699	6.41738	1.59053	4.03475	5.46613e-05	0.000172615	T36 ICN vs Protected Site Tahala	Halomonadaceae	Halomonas
						Otu0161	1.4492	-3.69632	1.55511	-2.37689	0.0174592	0.0287005	T36 ICN vs Protected Site Tahala	Micrococcaceae	Micrococcus
						Otu0165	2.44035	5.33146	2.0849	2.55717	0.0105527	0.0191867	T36 ICN vs Protected Site Tahala	Flavobacteriaceae	Ulvibacter
						Otu0167	1.61796	4.78099	1.70492	2.80424	0.00504352	0.00986775	T36 ICN vs Protected Site Tahala	Flammeovirgaceae	Roseivirga
						Otu0170	14.699	-7.04167	1.25191	-5.62475	1.8578e-08	1.11468e-07	T36 ICN vs Protected Site Tahala	Rhodobacteraceae	Rhodobacteraceae_unclassified
						Otu0172	2.72574	5.49611	1.44153	3.81269	0.000137462	0.000405627	T36 ICN vs Protected Site Tahala	Flavobacteriaceae	Polaribacter
						Otu0174	4.35322	6.17842	1.41056	4.38012	1.18614e-05	4.54267e-05	T36 ICN vs Protected Site Tahala	Cryomorphaceae	Owenweeksia
						Otu0193	3.08866	5.6918	1.78534	3.18807	0.00143226	0.00330521	T36 ICN vs Protected Site Tahala	Flammeovirgaceae	Roseivirga
						Otu0203	1.19154	4.3006	1.77187	2.42715	0.0152179	0.0260878	T36 ICN vs Protected Site Tahala	Flavobacteriaceae	Kordia
						Otu0204	2.29679	5.29082	1.84293	2.87088	0.0040933	0.00809663	T36 ICN vs Protected Site Tahala	Bacteroidetes_unclassified	Bacteroidetes_unclassified
						Otu0211	2.36548	5.33671	1.59196	3.35229	0.000801472	0.00197623	T36 ICN vs Protected Site Tahala	Rhizobiales_unclassified	Rhizobiales_unclassified
						Otu0214	2.52024	5.41152	1.81688	2.97846	0.00289699	0.0061348	T36 ICN vs Protected Site Tahala	GMDH_unclassified	GMDH_unclassified
						Otu0219	1.27093	4.39686	1.81442	2.42328	0.0153809	0.0261186	T36 ICN vs Protected Site Tahala	Alphaproteobacteria_unclassified	Alphaproteobacteria_unclassified
						Otu0228	1.78457	4.90423	1.68919	2.90331	0.0036924	0.00746779	T36 ICN vs Protected Site Tahala	Marinicellaceae	Marinicellaceae_unclassified
						Otu0233	6.87049	-5.94036	1.25244	-4.74304	2.10538e-06	9.4742e-06	T36 ICN vs Protected Site Tahala	Rhodobacteraceae	Rhodobacteraceae_unclassified
						Otu0245	6.71944	-5.90298	1.58475	-3.72486	0.000195425	0.000541177	T36 ICN vs Protected Site Tahala	Rhodobacteraceae	Rhodobacteraceae_unclassified
						Otu0248	6.25018	-5.8077	1.33632	-4.34603	1.38621e-05	5.19829e-05	T36 ICN vs Protected Site Tahala	Rhodobacteraceae	Rhodobacteraceae_unclassified
						Otu0256	5.28367	-5.10053	1.33481	-3.82115	0.000132831	0.000398492	T36 ICN vs Protected Site Tahala	BD-_unclassified	BD-_unclassified
						Otu0257	1.3685	4.52719	1.89463	2.38949	0.0168718	0.0281197	T36 ICN vs Protected Site Tahala	GMDH_unclassified	GMDH_unclassified
						Otu0258	4.47547	6.23069	1.46261	4.25998	2.04447e-05	7.21578e-05	T36 ICN vs Protected Site Tahala	Deltaproteobacteria_unclassified	Deltaproteobacteria_unclassified
						Otu0262	1.35395	4.52641	1.53582	2.94723	0.00320634	0.00663381	T36 ICN vs Protected Site Tahala	PB_unclassified	PB_unclassified
						Otu0263	2.34084	5.29371	1.53569	3.44711	0.000566611	0.00147811	T36 ICN vs Protected Site Tahala	Marinicellaceae	Marinicellaceae_unclassified
						Otu0264	4.68352	-4.92124	1.17313	-4.19495	2.72936e-05	9.2508e-05	T36 ICN vs Protected Site Tahala	Alteromonadaceae	BD-
						Otu0267	2.67121	5.4885	1.66055	3.30524	0.000948952	0.00224752	T36 ICN vs Protected Site Tahala	Saprospiraceae	Saprospiraceae_unclassified
						Otu0272	2.42476	-4.42187	2.01019	-2.19972	0.0278266	0.0420907	T36 ICN vs Protected Site Tahala	Erythrobacteraceae	Erythromicrobium
						Otu0273	1.91004	5.02808	1.63886	3.06803	0.00215478	0.0047884	T36 ICN vs Protected Site Tahala	Saprospiraceae	Saprospiraceae_unclassified
						Otu0281	1.1032	4.24551	1.99848	2.12437	0.033639	0.0488307	T36 ICN vs Protected Site Tahala	Cryomorphaceae	Owenweeksia
						Otu0290	5.35652	-5.5733	1.46808	-3.79633	0.000146856	0.000419588	T36 ICN vs Protected Site Tahala	Flavobacteriaceae	Tenacibaculum
						Otu0322	2.1365	5.13934	2.35492	2.18238	0.0290811	0.0432612	T36 ICN vs Protected Site Tahala	Flavobacteriaceae	Algibacter
						Otu0325	3.43726	-4.94531	1.32406	-3.73497	0.000187737	0.00052801	T36 ICN vs Protected Site Tahala	Rhodobacteraceae	Rhodobacteraceae_unclassified
						Otu0336	1.14475	4.2702	1.98855	2.1474	0.0317618	0.0464806	T36 ICN vs Protected Site Tahala	Oceanospirillaceae	Marinomonas
						Otu0344	1.40044	4.55462	1.71941	2.64894	0.00807442	0.0152989	T36 ICN vs Protected Site Tahala	GMDH_unclassified	GMDH_unclassified
						Otu0358	3.36801	-4.91939	1.33796	-3.67678	0.0002362	0.000634568	T36 ICN vs Protected Site Tahala	Rhodobacteraceae	Thalassobius
						Otu0359	2.05575	5.11009	2.12373	2.40618	0.0161202	0.0271181	T36 ICN vs Protected Site Tahala	Flavobacteriaceae	Flavobacteriaceae_unclassified
						Otu0369	1.52449	4.65459	1.90217	2.44698	0.0144058	0.0249331	T36 ICN vs Protected Site Tahala	Alcanivoracaceae	Alcanivorax
						Otu0371	1.18945	4.32264	1.73847	2.48647	0.0129018	0.0229933	T36 ICN vs Protected Site Tahala	Bdellovibrionaceae	Bdellovibrio
						Otu0474	1.67416	4.79703	1.59793	3.00203	0.00268183	0.00574678	T36 ICN vs Protected Site Tahala	Flavobacteriaceae	Flavobacteriaceae_unclassified
						Otu0482	1.42408	4.58489	1.86882	2.45337	0.0141526	0.0247328	T36 ICN vs Protected Site Tahala	Hyphomonadaceae	Maricaulis
						Otu0515	2.50137	5.38721	2.31333	2.32877	0.0198712	0.0313952	T36 ICN vs Protected Site Tahala	Campylobacterales_unclassified	Campylobacterales_unclassified
						Otu0541	2.01116	-4.15495	1.58014	-2.62948	0.00855157	0.0160342	T36 ICN vs Protected Site Tahala	Rhodobacteraceae	Rhodobacteraceae_unclassified
						Otu0543	1.4324	4.56543	2.1575	2.11607	0.0343388	0.0494479	T36 ICN vs Protected Site Tahala	Rhodobacteraceae	Roseovarius
						Otu0597	2.62421	5.45806	2.29793	2.37521	0.0175392	0.0287005	T36 ICN vs Protected Site Tahala	Alteromonadaceae	Marinobacter
						Otu0002	7574.87	-1.96283	0.639666	-3.06852	0.00215121	0.00496775	T36 ICN vs Exposed Site Tahala	Vibrionaceae	Photobacterium
						Otu0003	3268.89	6.71438	0.571017	11.7586	6.37593e-32	1.42821e-29	T36 ICN vs Exposed Site Tahala	Alteromonadaceae	Alteromonas
						Otu0004	2245.1	6.09602	0.575498	10.5926	3.22483e-26	1.80591e-24	T36 ICN vs Exposed Site Tahala	Alteromonadaceae	Alteromonas
						Otu0005	1129.28	11.9898	1.05474	11.3675	6.06867e-30	6.79691e-28	T36 ICN vs Exposed Site Tahala	Flavobacteriaceae	Flavobacteriaceae_unclassified
						Otu0006	9.76081	5.34932	1.24444	4.29857	1.71907e-05	6.21082e-05	T36 ICN vs Exposed Site Tahala	Simkaniaceae	Simkaniaceae_unclassified
						Otu0007	879.36	2.61125	0.640862	4.0746	4.60941e-05	0.000149639	T36 ICN vs Exposed Site Tahala	Rhodobacteraceae	Rhodobacteraceae_unclassified
						Otu0008	1984.34	-3.96331	0.646741	-6.12813	8.89203e-10	6.86833e-09	T36 ICN vs Exposed Site Tahala	Rhodobacteraceae	Nautella
						Otu0010	455.659	9.20158	0.837676	10.9847	4.52961e-28	3.38211e-26	T36 ICN vs Exposed Site Tahala	Alteromonadaceae	Alteromonas
						Otu0013	171.87	10.7166	1.27634	8.39633	4.60631e-17	1.47402e-15	T36 ICN vs Exposed Site Tahala	Endozoicimonaceae	Endozoicimonaceae_unclassified
						Otu0016	109.877	6.20676	1.05961	5.85762	4.69553e-09	3.3929e-08	T36 ICN vs Exposed Site Tahala	Rhodobacteraceae	Rhodobacteraceae_unclassified
						Otu0017	161.785	8.80282	1.43067	6.15292	7.60706e-10	6.08565e-09	T36 ICN vs Exposed Site Tahala	Rhodobacteraceae	Rhodobacteraceae_unclassified
						Otu0018	188.249	3.46688	0.641934	5.40068	6.63894e-08	3.81313e-07	T36 ICN vs Exposed Site Tahala	Oceanospirillaceae	Oleibacter
						Otu0020	45.0657	9.19724	1.29572	7.09817	1.26424e-12	1.66582e-11	T36 ICN vs Exposed Site Tahala	Saprospiraceae	Saprospira
						Otu0022	138.154	10.8141	1.17671	9.19012	3.92397e-20	1.75794e-18	T36 ICN vs Exposed Site Tahala	Alteromonadaceae	Marinobacter
						Otu0025	97.419	3.00012	0.892174	3.36271	0.00077181	0.00187919	T36 ICN vs Exposed Site Tahala	Flavobacteriaceae	Tenacibaculum
						Otu0026	60.4189	5.99091	0.955723	6.26846	3.6464e-10	3.14151e-09	T36 ICN vs Exposed Site Tahala	Pseudoalteromonadaceae	Pseudoalteromonas
						Otu0027	326.883	-7.43585	0.940685	-7.90472	2.68539e-15	5.44166e-14	T36 ICN vs Exposed Site Tahala	Vibrionaceae	Photobacterium
						Otu0029	136.383	-3.50928	0.984325	-3.56516	0.000363635	0.000958286	T36 ICN vs Exposed Site Tahala	Vibrionaceae	Vibrio
						Otu0030	100.975	10.3611	1.14115	9.07951	1.09063e-19	4.0717e-18	T36 ICN vs Exposed Site Tahala	Rhodobacteraceae	Anaerospora
						Otu0031	3.42313	-4.93256	1.68046	-2.93526	0.00333273	0.00717819	T36 ICN vs Exposed Site Tahala	Cohaesibacteraceae	Cohaesibacter
						Otu0032	68.0721	9.79106	1.20342	8.13601	4.08518e-16	1.01676e-14	T36 ICN vs Exposed Site Tahala	Flavobacteriaceae	Flavobacteriaceae_unclassified
						Otu0034	31.3542	8.67406	1.17938	7.35477	1.91257e-13	3.06011e-12	T36 ICN vs Exposed Site Tahala	Endozoicimonaceae	Endozoicimonaceae_unclassified
						Otu0037	52.3536	8.1991	1.12111	7.31338	2.60504e-13	3.89019e-12	T36 ICN vs Exposed Site Tahala	Flavobacteriaceae	Flavobacteriaceae_unclassified
						Otu0038	25.9119	2.9552	1.10032	2.68576	0.00723642	0.0144728	T36 ICN vs Exposed Site Tahala	Amoebophilaceae	SGUS
						Otu0039	39.3193	3.17164	0.814013	3.89631	9.76699e-05	0.000280488	T36 ICN vs Exposed Site Tahala	Pseudoalteromonadaceae	Pseudoalteromonas
						Otu0042	6.64751	-3.85754	1.45306	-2.65477	0.00793628	0.0155941	T36 ICN vs Exposed Site Tahala	Clostridiales_unclassified	Clostridiales_unclassified
						Otu0045	44.7029	2.43995	0.812394	3.0034	0.0026698	0.00598034	T36 ICN vs Exposed Site Tahala	Alteromonadales_unclassified	Alteromonadales_unclassified
						Otu0046	60.1739	9.61413	1.14878	8.369	5.81076e-17	1.62701e-15	T36 ICN vs Exposed Site Tahala	GMDH_unclassified	GMDH_unclassified
						Otu0048	21.5446	8.12863	1.20436	6.74936	1.48501e-11	1.58401e-10	T36 ICN vs Exposed Site Tahala	Idiomarinaceae	Idiomarina
						Otu0049	41.8799	-5.05979	1.11979	-4.51852	6.22727e-06	2.58317e-05	T36 ICN vs Exposed Site Tahala	Campylobacteraceae	Arcobacter
						Otu0050	36.8231	8.90601	1.12813	7.89448	2.91517e-15	5.44166e-14	T36 ICN vs Exposed Site Tahala	Alteromonadaceae	Glaciecola
						Otu0051	121.063	-3.24886	0.741774	-4.37985	1.18762e-05	4.50895e-05	T36 ICN vs Exposed Site Tahala	Rhodobacteraceae	Nautella
						Otu0052	52.8184	-2.30048	0.916429	-2.51026	0.0120642	0.0230972	T36 ICN vs Exposed Site Tahala	Campylobacteraceae	Arcobacter
						Otu0053	90.6997	10.2062	1.30521	7.81959	5.29955e-15	9.13153e-14	T36 ICN vs Exposed Site Tahala	Rhodothermaceae	Rubricoccus
						Otu0057	26.0063	8.40984	1.27167	6.6132	3.76087e-11	3.66276e-10	T36 ICN vs Exposed Site Tahala	Flavobacteriaceae	Flavobacteriaceae_unclassified
						Otu0061	61.5962	-8.2338	1.14588	-7.1856	6.6914e-13	9.36797e-12	T36 ICN vs Exposed Site Tahala	Ferrimonadaceae	Ferrimonas
						Otu0062	29.7229	6.35458	1.12542	5.64643	1.63811e-08	1.04839e-07	T36 ICN vs Exposed Site Tahala	Alteromonadaceae	Glaciecola
						Otu0064	4.53293	-5.33112	1.46403	-3.64141	0.000271149	0.0007407	T36 ICN vs Exposed Site Tahala	Flavobacteriaceae	Flavobacterium
						Otu0065	36.0818	8.87768	1.29709	6.84433	7.68329e-12	8.60528e-11	T36 ICN vs Exposed Site Tahala	Alteromonadaceae	Glaciecola
						Otu0066	55.1654	9.48844	1.19622	7.93204	2.15571e-15	4.82879e-14	T36 ICN vs Exposed Site Tahala	Rhodobacteraceae	Rhodobacteraceae_unclassified
						Otu0067	48.4203	-4.45961	1.02193	-4.36391	1.27756e-05	4.76955e-05	T36 ICN vs Exposed Site Tahala	Flavobacteriaceae	Tenacibaculum
						Otu0073	27.748	6.18782	1.11097	5.56973	2.55132e-08	1.54458e-07	T36 ICN vs Exposed Site Tahala	Oceanospirillaceae	Oceanospirillum
						Otu0074	17.1761	7.81109	1.43567	5.44072	5.30647e-08	3.12803e-07	T36 ICN vs Exposed Site Tahala	Hyphomonadaceae	Hyphomonadaceae_unclassified
						Otu0076	3.58137	-4.99232	1.6299	-3.06296	0.00219157	0.0050093	T36 ICN vs Exposed Site Tahala	Cytophagaceae	Flectobacillus
						Otu0077	12.18	7.31515	1.29712	5.63954	1.705e-08	1.06089e-07	T36 ICN vs Exposed Site Tahala	BD-_unclassified	BD-_unclassified
						Otu0078	6.00757	-5.7386	1.67215	-3.43188	0.000599418	0.00149188	T36 ICN vs Exposed Site Tahala	Oxalobacteraceae	Polynucleobacter
						Otu0080	7.38129	6.5715	1.31523	4.99648	5.83867e-07	2.84318e-06	T36 ICN vs Exposed Site Tahala	Oceanospirillaceae	Marinomonas
						Otu0084	12.133	7.31035	1.37252	5.32623	1.00272e-07	5.61523e-07	T36 ICN vs Exposed Site Tahala	Hyphomonadaceae	Oceanicaulis
						Otu0089	4.15367	-5.20439	1.47275	-3.53379	0.000409649	0.00105473	T36 ICN vs Exposed Site Tahala	Microbacteriaceae	Candidatus_Rhodoluna
						Otu0090	9.27007	4.74629	1.0652	4.45576	8.35965e-06	3.34386e-05	T36 ICN vs Exposed Site Tahala	Pseudoalteromonadaceae	Pseudoalteromonas
						Otu0091	10.9075	7.14972	1.24395	5.7476	9.05194e-09	5.96363e-08	T36 ICN vs Exposed Site Tahala	BD-_unclassified	BD-_unclassified
						Otu0094	16.6999	4.66435	1.33108	3.50418	0.000458021	0.00115277	T36 ICN vs Exposed Site Tahala	Oceanospirillaceae	Oleibacter
						Otu0095	54.8403	-7.17412	1.14808	-6.2488	4.13619e-10	3.43151e-09	T36 ICN vs Exposed Site Tahala	Proteobacteria_unclassified	Proteobacteria_unclassified
						Otu0097	5.48484	6.16256	1.52172	4.04974	5.12753e-05	0.00016177	T36 ICN vs Exposed Site Tahala	BD-_unclassified	BD-_unclassified
						Otu0098	13.5075	7.46204	1.158	6.44392	1.16429e-10	1.04321e-09	T36 ICN vs Exposed Site Tahala	Hyphomonadaceae	Hyphomonas
						Otu0104	37.5269	8.93263	1.28291	6.96281	3.33551e-12	4.15085e-11	T36 ICN vs Exposed Site Tahala	Rhodobacteraceae	Marivita
						Otu0107	6.29471	6.36496	1.19803	5.31285	1.07922e-07	5.89622e-07	T36 ICN vs Exposed Site Tahala	Pseudoalteromonadaceae	Pseudoalteromonas
						Otu0108	18.7391	7.93435	1.1578	6.85297	7.23305e-12	8.52738e-11	T36 ICN vs Exposed Site Tahala	Cryomorphaceae	Cryomorphaceae_unclassified
						Otu0109	17.7304	7.85041	1.17344	6.6901	2.23022e-11	2.27077e-10	T36 ICN vs Exposed Site Tahala	Flammeovirgaceae	Roseivirga
						Otu0111	18.1311	7.88682	1.2156	6.48799	8.69881e-11	8.11889e-10	T36 ICN vs Exposed Site Tahala	Flavobacteriaceae	Winogradskyella
						Otu0113	17.2016	-7.25817	1.23904	-5.85791	4.68723e-09	3.3929e-08	T36 ICN vs Exposed Site Tahala	Campylobacteraceae	Arcobacter
						Otu0114	1.65758	-3.87541	1.66548	-2.3269	0.0199705	0.035892	T36 ICN vs Exposed Site Tahala	Flavobacteriaceae	Flavobacteriaceae_unclassified
						Otu0120	15.5793	-3.14959	1.04999	-2.99964	0.00270298	0.00599473	T36 ICN vs Exposed Site Tahala	Rhodobacteraceae	Rhodobacteraceae_unclassified
						Otu0121	6.49175	5.10033	1.23134	4.1421	3.44134e-05	0.000120447	T36 ICN vs Exposed Site Tahala	Oceanospirillaceae	Oceanospirillaceae_unclassified
						Otu0122	19.0933	7.95885	2.85289	2.78975	0.00527484	0.0109404	T36 ICN vs Exposed Site Tahala	Oceanospirillaceae	Oceanospirillaceae_unclassified
						Otu0125	1.53227	-3.76362	1.50461	-2.5014	0.0123704	0.0234461	T36 ICN vs Exposed Site Tahala	Pirellulaceae	Pirellulaceae_unclassified
						Otu0126	4.67402	5.0594	1.25352	4.03616	5.43322e-05	0.000169034	T36 ICN vs Exposed Site Tahala	Burkholderiaceae	Burkholderia
						Otu0128	9.45539	6.95493	1.38291	5.0292	4.9253e-07	2.50742e-06	T36 ICN vs Exposed Site Tahala	Flavobacteriaceae	Winogradskyella
						Otu0130	1.91231	-4.08265	1.68199	-2.42728	0.0152124	0.0283965	T36 ICN vs Exposed Site Tahala	Vibrionaceae	Photobacterium
						Otu0133	8.92365	6.87028	1.68244	4.08352	4.4358e-05	0.000146121	T36 ICN vs Exposed Site Tahala	Flavobacteriaceae	Flavobacteriaceae_unclassified
						Otu0135	10.3047	7.06869	1.22507	5.77005	7.92464e-09	5.37915e-08	T36 ICN vs Exposed Site Tahala	Hyphomonadaceae	Hyphomonadaceae_unclassified
						Otu0137	18.5496	-2.68876	0.757234	-3.55076	0.000384117	0.00100049	T36 ICN vs Exposed Site Tahala	Rhodobacteraceae	Nautella
						Otu0140	4.63827	5.9167	1.31654	4.49413	6.98564e-06	2.84506e-05	T36 ICN vs Exposed Site Tahala	Alteromonadaceae	Alteromonas
						Otu0146	3.55263	-4.97705	1.7878	-2.7839	0.00537094	0.0110375	T36 ICN vs Exposed Site Tahala	Vibrionaceae	Vibrionaceae_unclassified
						Otu0151	11.0649	-2.25629	0.97881	-2.30514	0.0211588	0.0373194	T36 ICN vs Exposed Site Tahala	Alteromonadales_unclassified	Alteromonadales_unclassified
						Otu0156	7.96387	6.68989	1.37858	4.85275	1.21763e-06	5.68226e-06	T36 ICN vs Exposed Site Tahala	Kiloniellaceae	Thalassospira
						Otu0158	7.18579	6.53923	1.30405	5.01456	5.31555e-07	2.64596e-06	T36 ICN vs Exposed Site Tahala	Halomonadaceae	Halomonas
						Otu0161	2.19467	-3.25865	1.41182	-2.30812	0.0209922	0.0373194	T36 ICN vs Exposed Site Tahala	Micrococcaceae	Micrococcus
						Otu0162	2.75912	5.18363	1.73702	2.98421	0.00284313	0.00624374	T36 ICN vs Exposed Site Tahala	BD-_unclassified	BD-_unclassified
						Otu0163	9.33786	6.9288	1.75407	3.95013	7.81076e-05	0.000230212	T36 ICN vs Exposed Site Tahala	Alteromonadaceae	Glaciecola
						Otu0165	2.70083	5.16102	1.74057	2.96513	0.00302558	0.0065799	T36 ICN vs Exposed Site Tahala	Flavobacteriaceae	Ulvibacter
						Otu0167	3.25134	5.38611	1.49538	3.60183	0.000315986	0.000842629	T36 ICN vs Exposed Site Tahala	Flammeovirgaceae	Roseivirga
						Otu0169	3.44475	5.04068	1.76758	2.85174	0.0043481	0.00910256	T36 ICN vs Exposed Site Tahala	Gammaproteobacteria_unclassified	Gammaproteobacteria_unclassified
						Otu0170	20.3291	-7.498	1.28869	-5.81833	5.94383e-09	4.16068e-08	T36 ICN vs Exposed Site Tahala	Rhodobacteraceae	Rhodobacteraceae_unclassified
						Otu0171	4.51899	5.87145	1.42805	4.11151	3.93088e-05	0.000133412	T36 ICN vs Exposed Site Tahala	Bacteriovoracaceae	Bacteriovoracaceae_unclassified
						Otu0172	5.73015	6.22478	1.58377	3.93036	8.48196e-05	0.000246748	T36 ICN vs Exposed Site Tahala	Flavobacteriaceae	Polaribacter
						Otu0174	7.54517	6.61803	1.31293	5.04065	4.63964e-07	2.41872e-06	T36 ICN vs Exposed Site Tahala	Cryomorphaceae	Owenweeksia
						Otu0192	2.29154	4.88302	1.50094	3.25331	0.00114067	0.0027182	T36 ICN vs Exposed Site Tahala	Bacteria_unclassified	Bacteria_unclassified
						Otu0193	4.49672	5.86915	1.27246	4.61246	3.97926e-06	1.74775e-05	T36 ICN vs Exposed Site Tahala	Flammeovirgaceae	Roseivirga
						Otu0202	2.87203	3.95144	1.74593	2.26323	0.0236214	0.0413374	T36 ICN vs Exposed Site Tahala	Pelagibacteraceae	Pelagibacteraceae_unclassified
						Otu0203	5.03561	6.02252	1.65788	3.63267	0.000280503	0.00075702	T36 ICN vs Exposed Site Tahala	Flavobacteriaceae	Kordia
						Otu0204	4.02425	5.70099	1.41401	4.0318	5.53506e-05	0.000169843	T36 ICN vs Exposed Site Tahala	Bacteroidetes_unclassified	Bacteroidetes_unclassified
						Otu0211	2.8647	5.23189	1.48842	3.51507	0.000439641	0.00111909	T36 ICN vs Exposed Site Tahala	Rhizobiales_unclassified	Rhizobiales_unclassified
						Otu0214	5.25797	6.09149	1.28367	4.74537	2.08125e-06	9.5143e-06	T36 ICN vs Exposed Site Tahala	GMDH_unclassified	GMDH_unclassified
						Otu0219	3.31203	5.42142	1.63259	3.32075	0.000897752	0.00216233	T36 ICN vs Exposed Site Tahala	Alphaproteobacteria_unclassified	Alphaproteobacteria_unclassified
						Otu0221	3.7243	5.58736	1.45148	3.84941	0.000118401	0.00033572	T36 ICN vs Exposed Site Tahala	Rhizobiales_unclassified	Rhizobiales_unclassified
						Otu0228	4.31787	5.79751	1.33627	4.33857	1.43412e-05	5.26627e-05	T36 ICN vs Exposed Site Tahala	Marinicellaceae	Marinicellaceae_unclassified
						Otu0233	8.87066	-6.29983	1.27413	-4.9444	7.63801e-07	3.64024e-06	T36 ICN vs Exposed Site Tahala	Rhodobacteraceae	Rhodobacteraceae_unclassified
						Otu0239	1.91416	4.66812	2.0071	2.3258	0.020029	0.035892	T36 ICN vs Exposed Site Tahala	Flavobacteriaceae	Flavobacteriaceae_unclassified
						Otu0245	9.18769	-6.35245	1.56647	-4.05525	5.008e-05	0.000160256	T36 ICN vs Exposed Site Tahala	Rhodobacteraceae	Rhodobacteraceae_unclassified
						Otu0248	8.605	-5.85571	1.31637	-4.44838	8.65223e-06	3.40017e-05	T36 ICN vs Exposed Site Tahala	Rhodobacteraceae	Rhodobacteraceae_unclassified
						Otu0253	2.62134	5.09862	1.34927	3.77879	0.000157589	0.00044125	T36 ICN vs Exposed Site Tahala	Hyphomonadaceae	Hyphomonadaceae_unclassified
						Otu0256	7.39543	-5.59561	1.36524	-4.09861	4.1563e-05	0.000138957	T36 ICN vs Exposed Site Tahala	BD-_unclassified	BD-_unclassified
						Otu0257	1.71604	4.46828	1.78805	2.49896	0.0124557	0.0234461	T36 ICN vs Exposed Site Tahala	GMDH_unclassified	GMDH_unclassified
						Otu0258	4.61773	5.89265	1.29662	4.54462	5.5034e-06	2.32596e-05	T36 ICN vs Exposed Site Tahala	Deltaproteobacteria_unclassified	Deltaproteobacteria_unclassified
						Otu0262	3.59513	5.54246	1.32826	4.17273	3.00973e-05	0.000107013	T36 ICN vs Exposed Site Tahala	PB_unclassified	PB_unclassified
						Otu0263	8.36155	6.76479	1.44965	4.66651	3.06355e-06	1.37247e-05	T36 ICN vs Exposed Site Tahala	Marinicellaceae	Marinicellaceae_unclassified
[truncated: 168 more rows]
