# Supplementary figures and images for: Contrasting heat stress response patterns of coral holobionts across the Red Sea suggest distinct mechanisms of thermal tolerance
Source: Research Square preprint supplement (doi:10.21203/rs.3.rs-117181/v1), 2020-12-18

KS1-3ØB

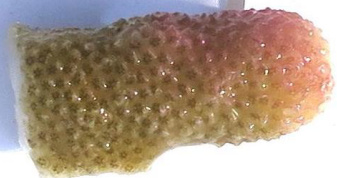

KS1-3ØB

KS2-3ØB

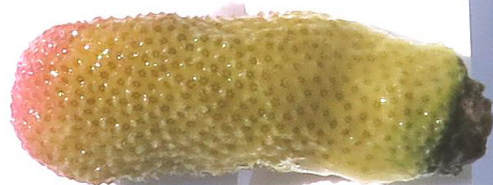

KS2-3ØB

KS3-3ØB

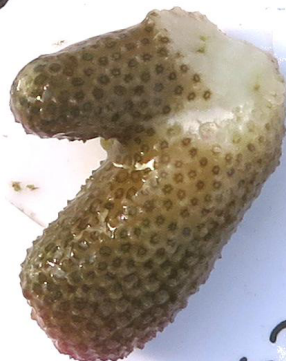

KS3-3ØB

KS4-3ØB

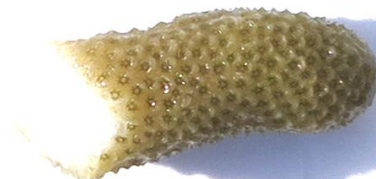

KS4-3ØB

KS5-3ØB

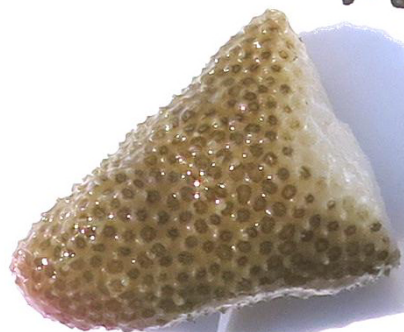

KS5-3ØB

KS6-3ØB

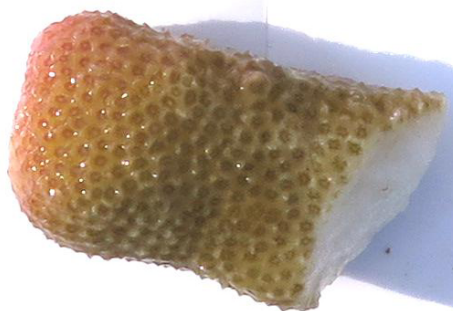

KS6-3ØB

KS7-3ØB

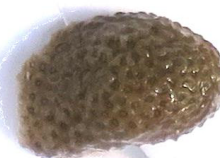

KS7-3ØB

Supplement: Supplementary file 1 [file AF-30.pdf › DataS1_CoralBleaching/AF-30.pdf]

KS1-33B

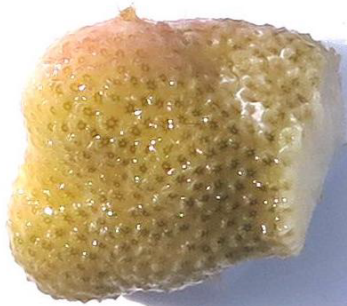

KS1-33B

KS2-33B

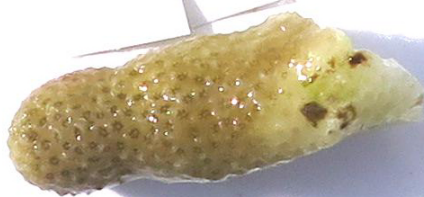

KS2-33B

KS3-33B

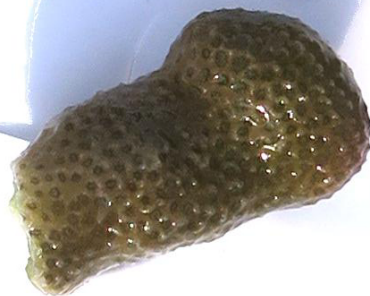

KS3-33B

KS4-33B

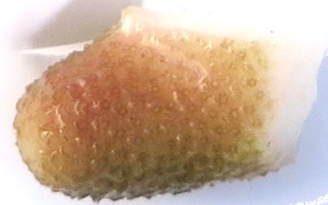

KS4-33B

KS5-33B

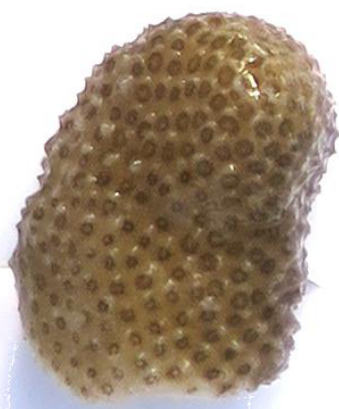

KS5-33B

KS6-33B

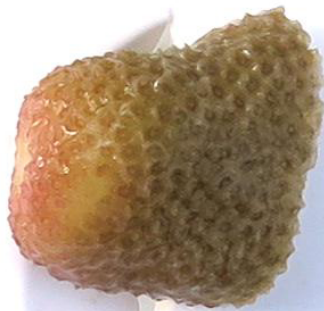

KS6-33B

KS7-33B

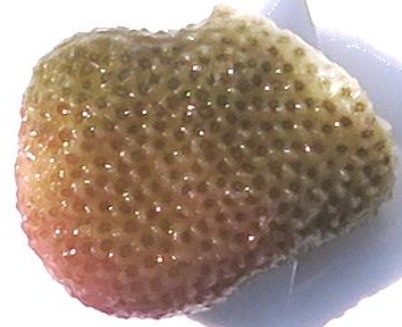

KS7-33B

Supplement: Supplementary file 2 [file AF-33.pdf › DataS1_CoralBleaching/AF-33.pdf]

KS1-36B

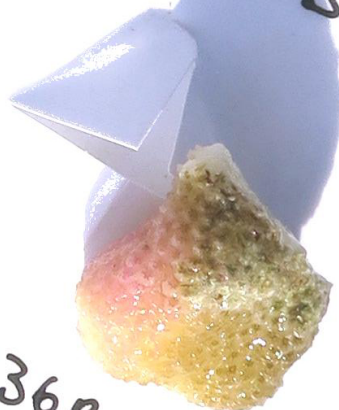

KS1-36B

KS2-36B

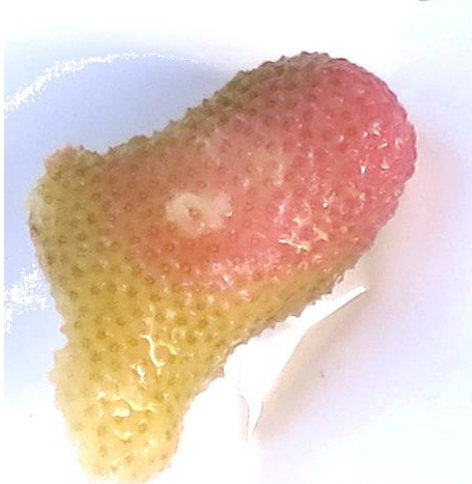

KS2-36B

KS3-36B

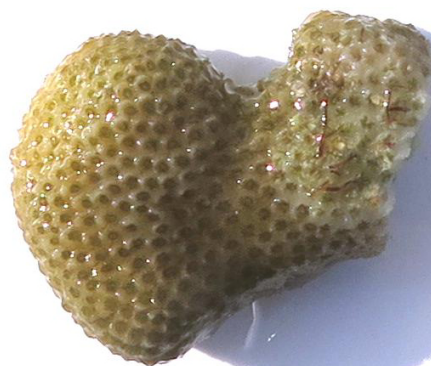

KS3-36B

KS4-36B

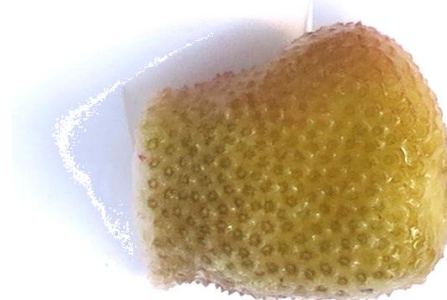

KS4-36B

KS5-36B

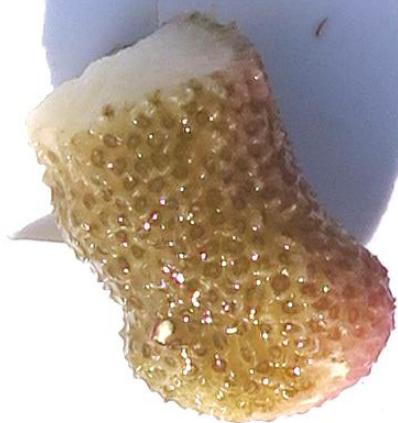

KS5-36B

KS6-36B

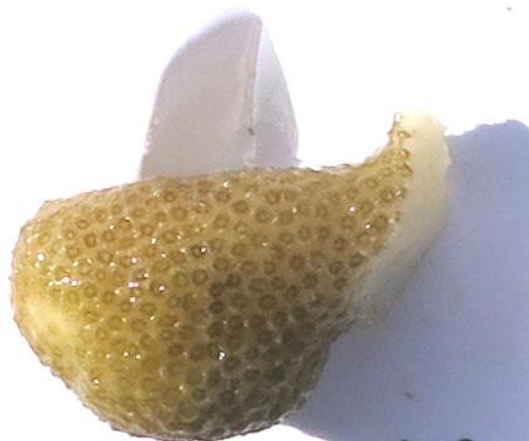

KS6-36B

KS7-36B

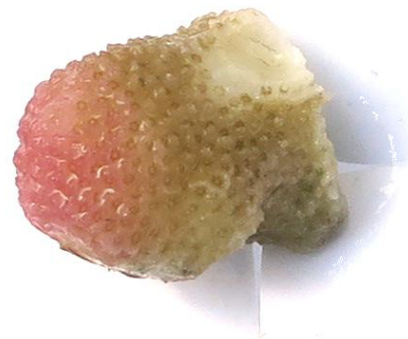

KS7-36B

Supplement: Supplementary file 3 [file AF-36.pdf › DataS1_CoralBleaching/AF-36.pdf]

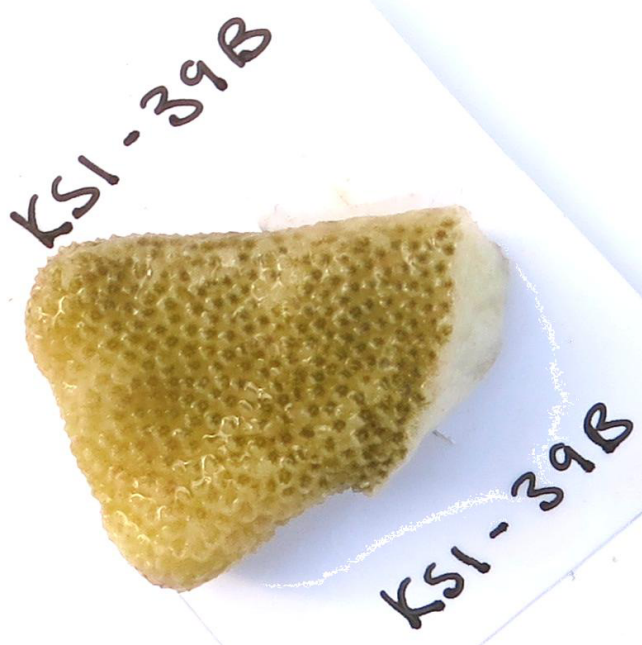

KS2-39B

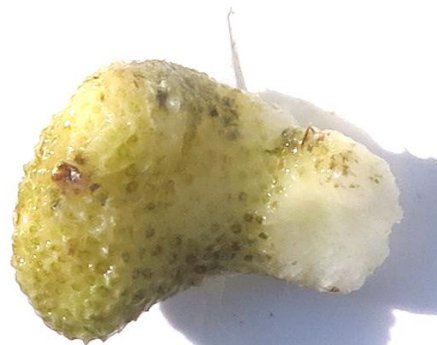

KS3-39B

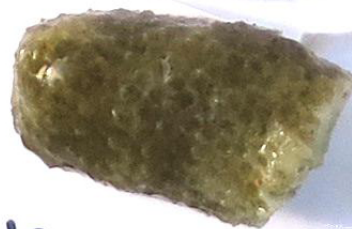

KS4-39B

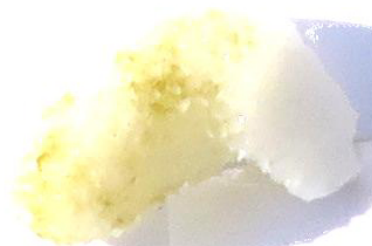

KS2-39B

KS3-39B

KS4-39B

KS5-39B

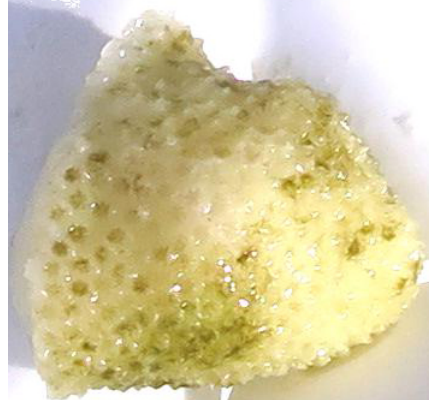

KS6-39B

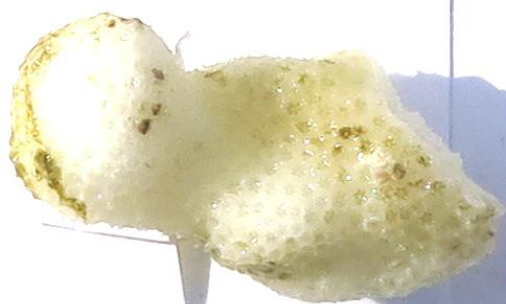

KS5-39B

KS6-39B

KS7-39B

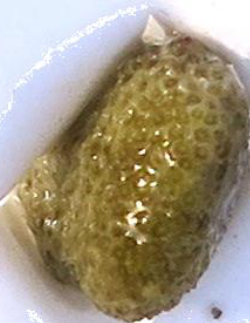

KS7-39B

Supplement: Supplementary file 4 [file AF-39.pdf › DataS1_CoralBleaching/AF-39.pdf]

S1-E-ST-30B

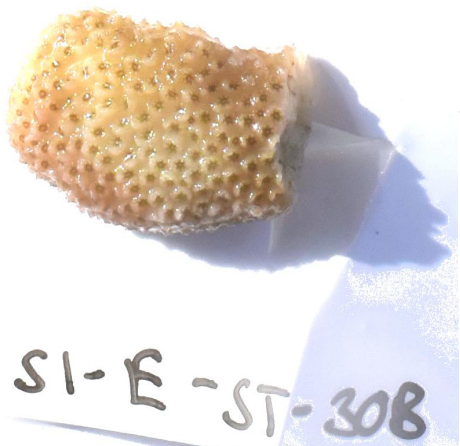

S2-E-ST-30B

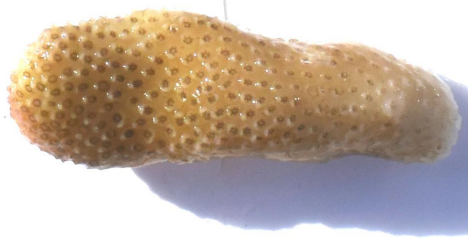

S2-E-ST-30B

S3-E-ST-30B

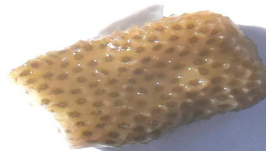

S3-E-ST-30B

S4-E-ST-30B

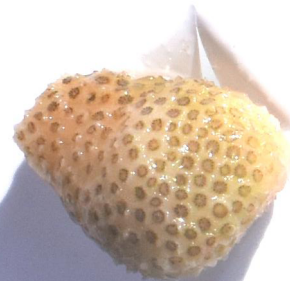

S4-E-ST-30B

S5-E-ST-30B

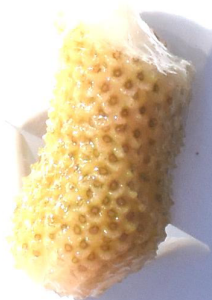

S5-E-ST-30B

S6-E-ST-30B

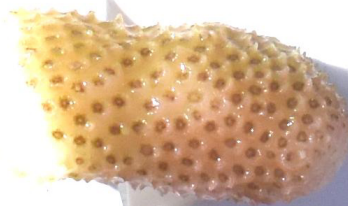

S6-E-ST-30B

S7-E-ST-30B

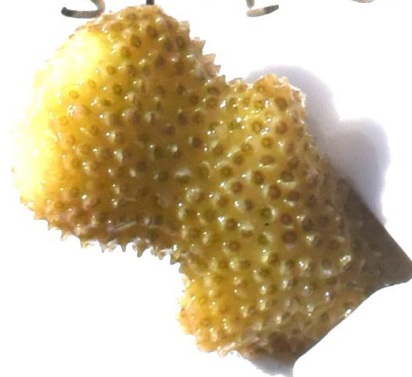

S7-E-ST-30B

Supplement: Supplementary file 5 [file ExT-30.pdf › DataS1_CoralBleaching/ExT-30.pdf]

S1-E-ST-33B

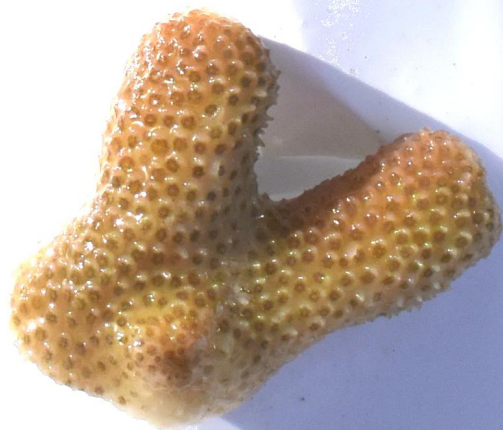

S1-E-ST-33B

S2-E-ST-33B

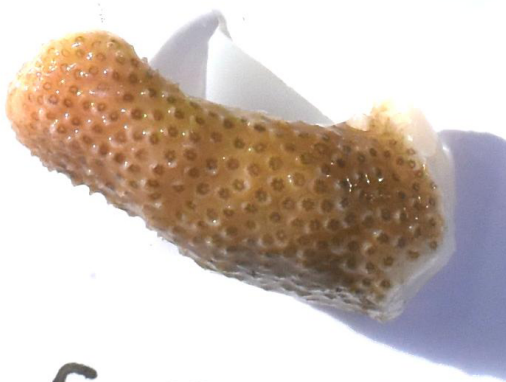

S2-E-ST-33B

S3-E-ST-33B

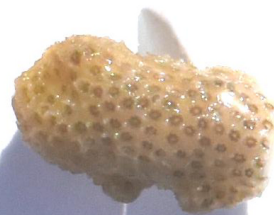

S3-E-ST-33B

S5-E-ST-33B

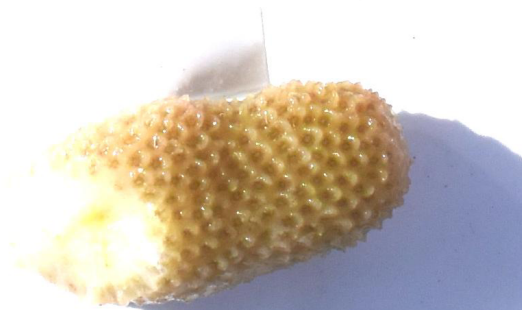

S5-E-ST-33B

S6-E-ST-33AB

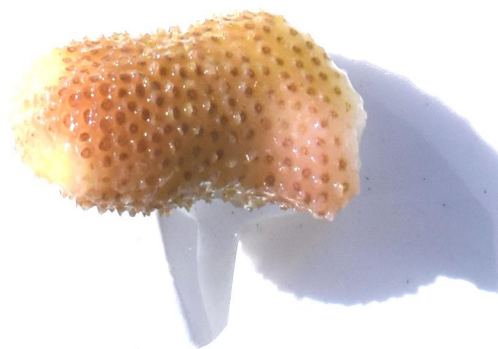

S6-E-ST-33B

S7-E-ST-33B

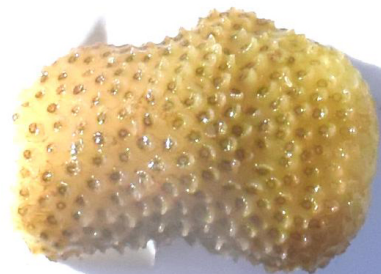

S7-E-ST-33B

Supplement: Supplementary file 6 [file ExT-33.pdf › DataS1_CoralBleaching/ExT-33.pdf]

S1-E-ST-36B

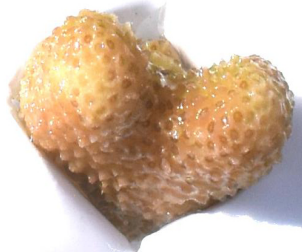

S2-E-ST-36B

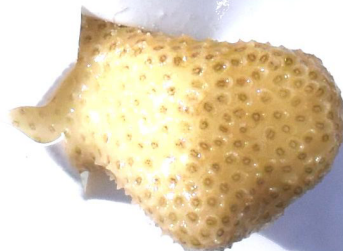

S3-E-ST-36B

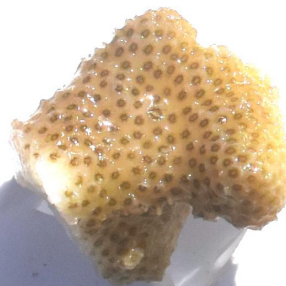

S4-E-ST-36B

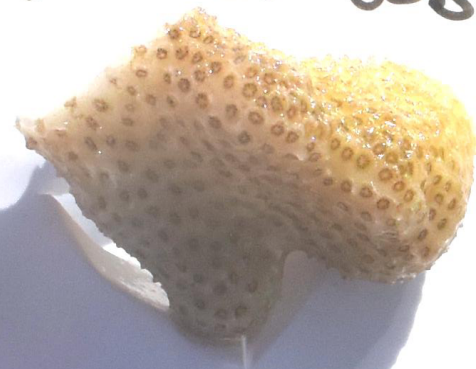

S1-E-ST-36B

S2-E-ST-36B

S3-E-ST-36B

S4-E-ST-36B

S5-E-ST-36B

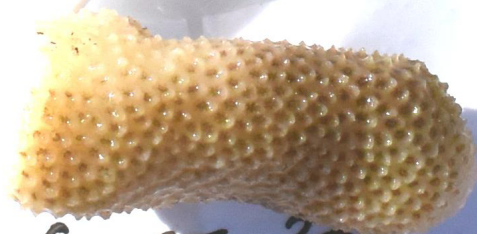

S5-E-ST-36B

S6-E-ST-36B

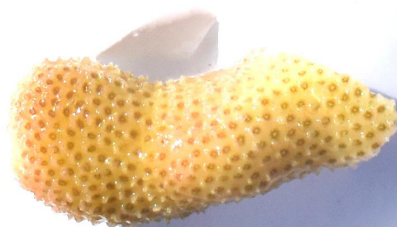

S6-E-ST-36B

S7-E-ST-36B

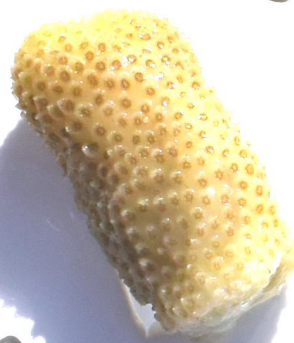

S7-E-ST-36B

Supplement: Supplementary file 7 [file ExT-36.pdf › DataS1_CoralBleaching/ExT-36.pdf]

S1-E-ST-39B

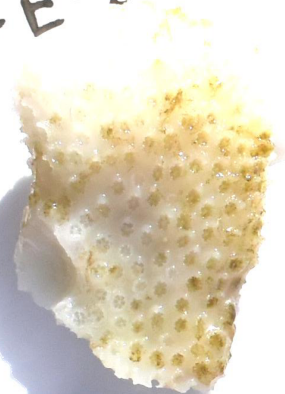

S2-E-ST-39B

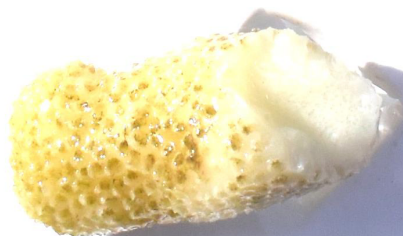

S3-E-ST-39B

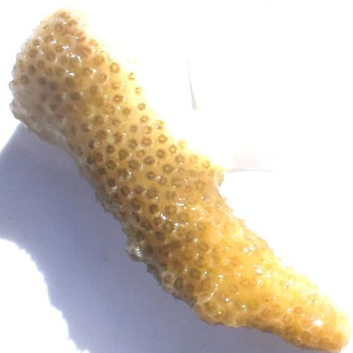

S4-E-ST-39B

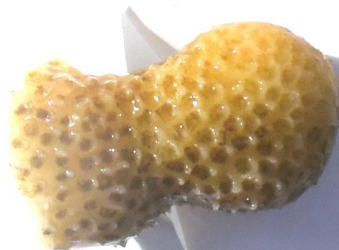

S1-E-ST-39B

S2-E-ST-39B

S3-E-ST-39B

S4-E-ST-39B

S5-E-ST-39B

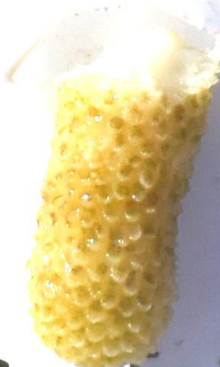

S6-E-ST-39B

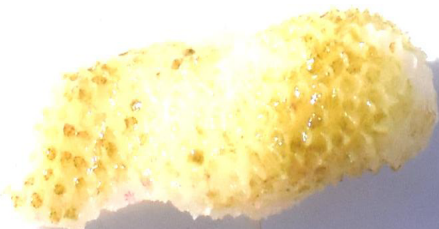

S7-E-ST-39B

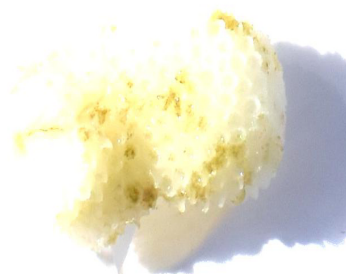

S5-E-ST-39B

S6-E-ST-39B

S7-E-ST-39B

Supplement: Supplementary file 8 [file ExT-39.pdf › DataS1_CoralBleaching/ExT-39.pdf]

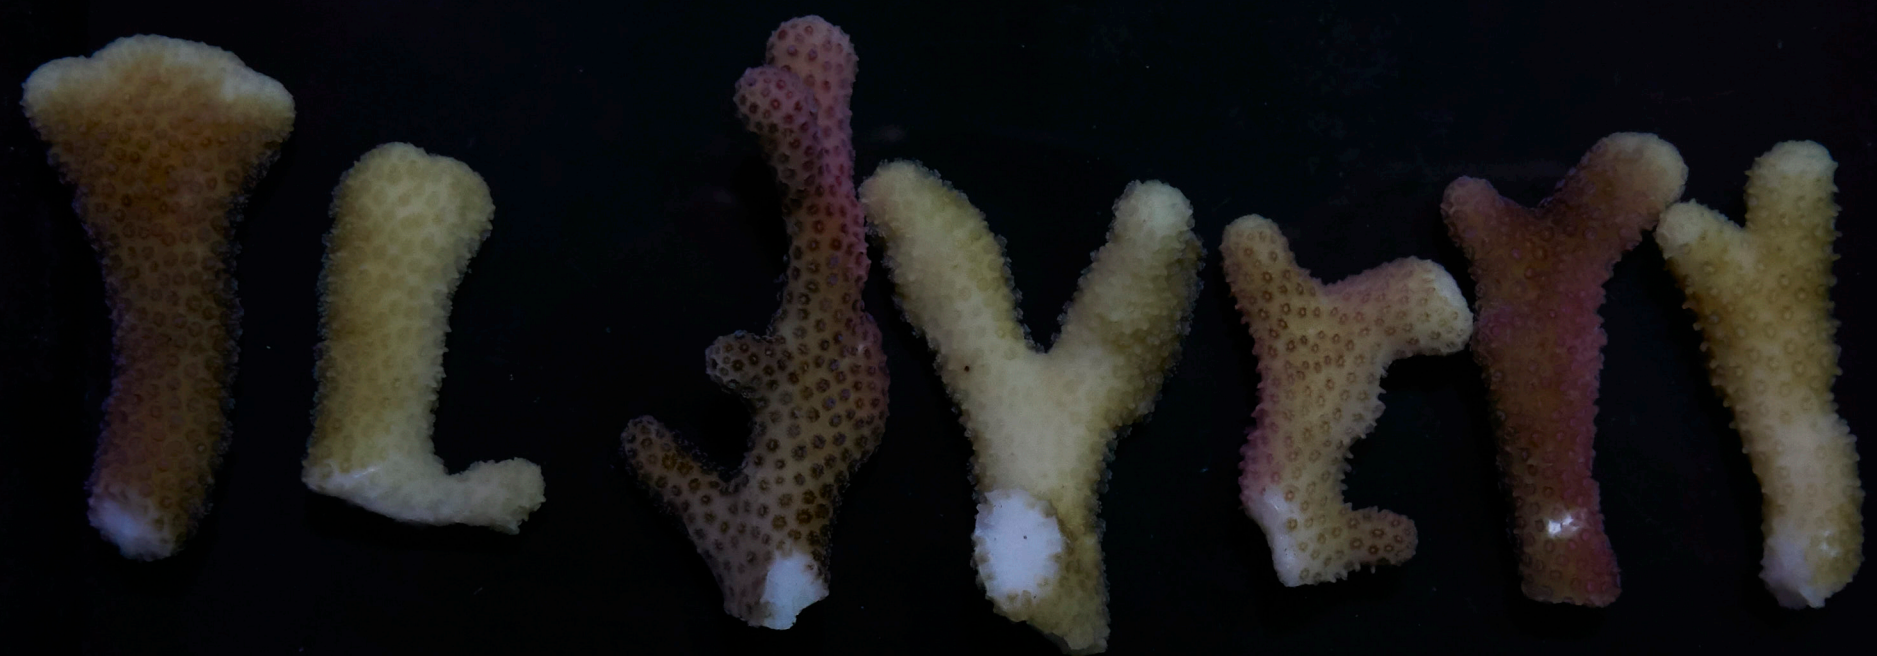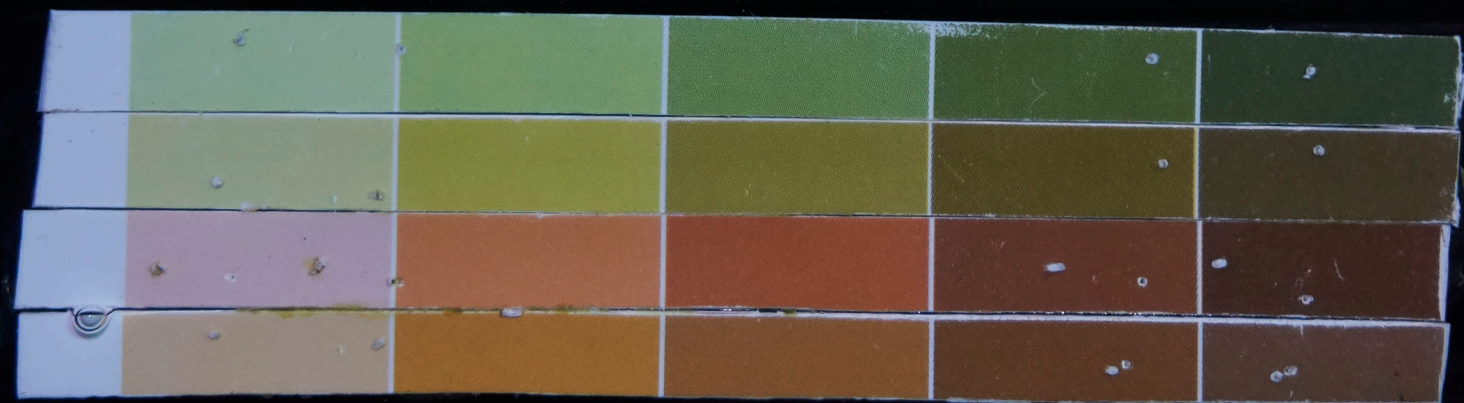

Supplement: Supplementary file 9 [file ICN-30.pdf › DataS1_CoralBleaching/ICN-30.pdf]

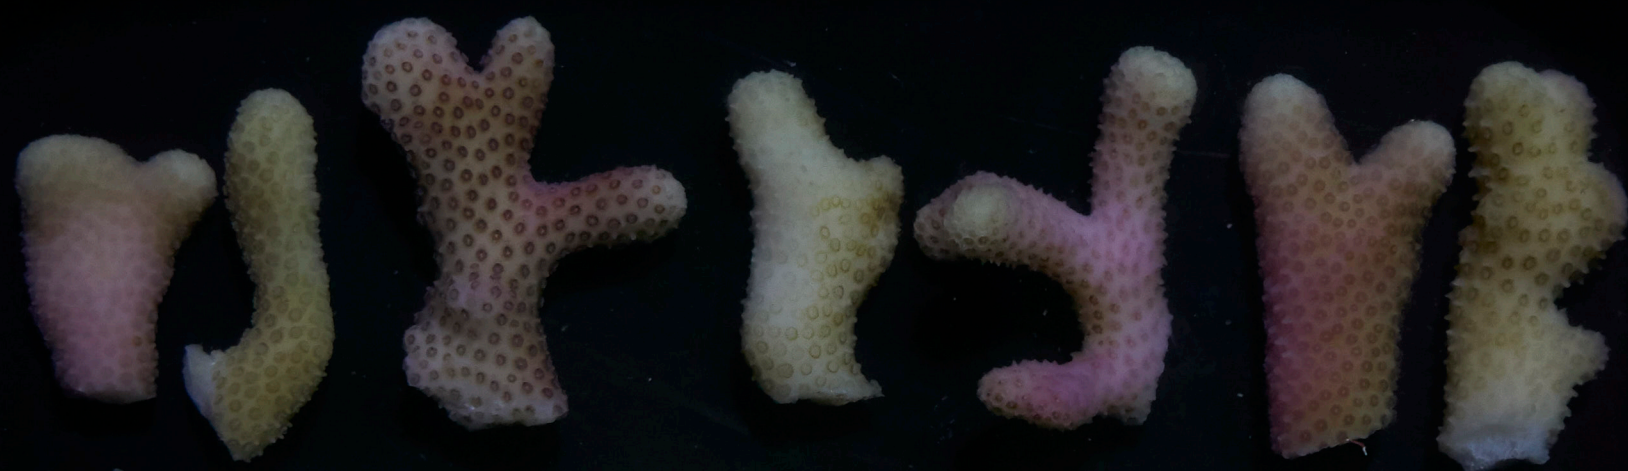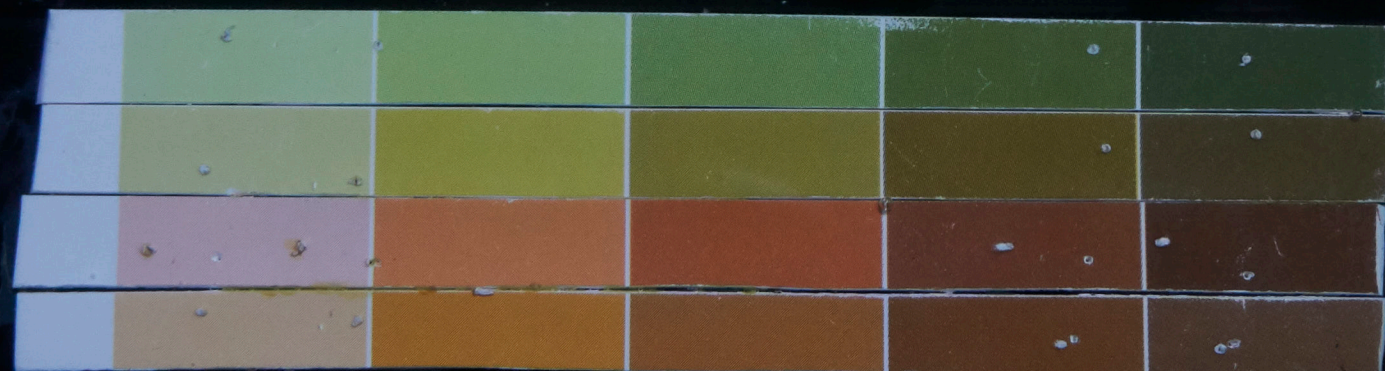

Supplement: Supplementary file 10 [file ICN-33.pdf › DataS1_CoralBleaching/ICN-33.pdf]

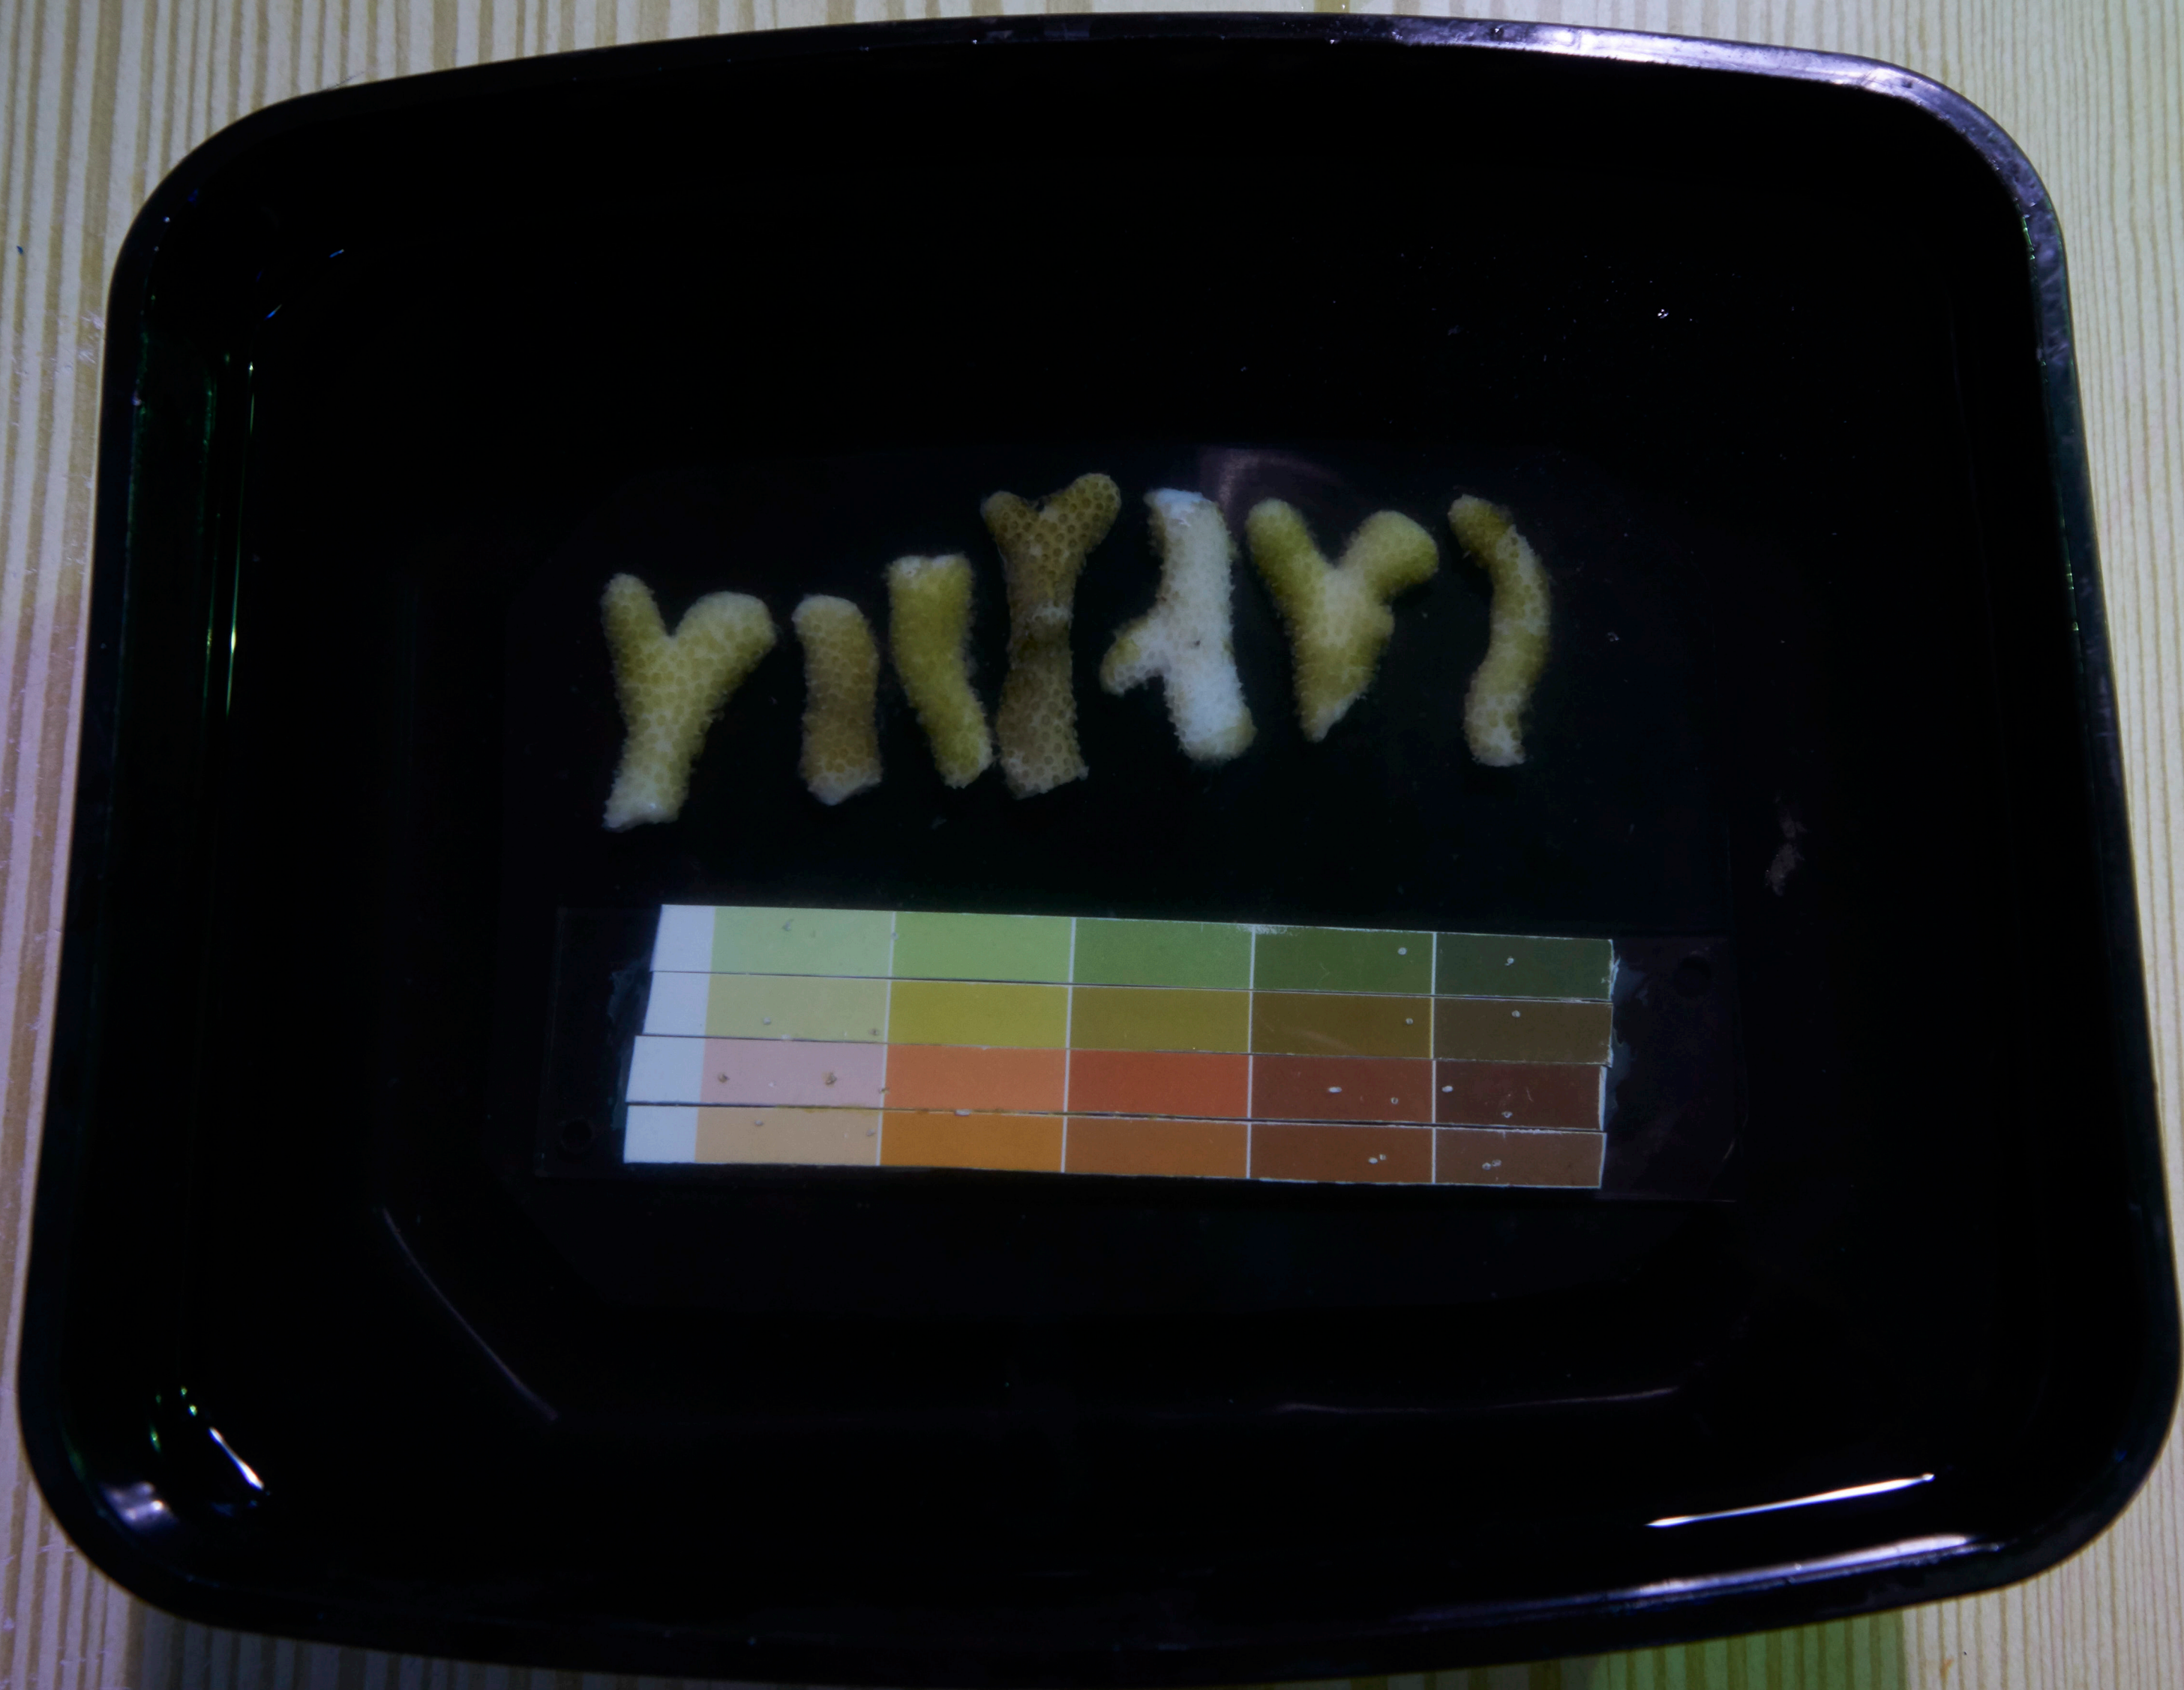

Supplement: Supplementary file 11 [file ICN-36.pdf › DataS1_CoralBleaching/ICN-36.pdf]

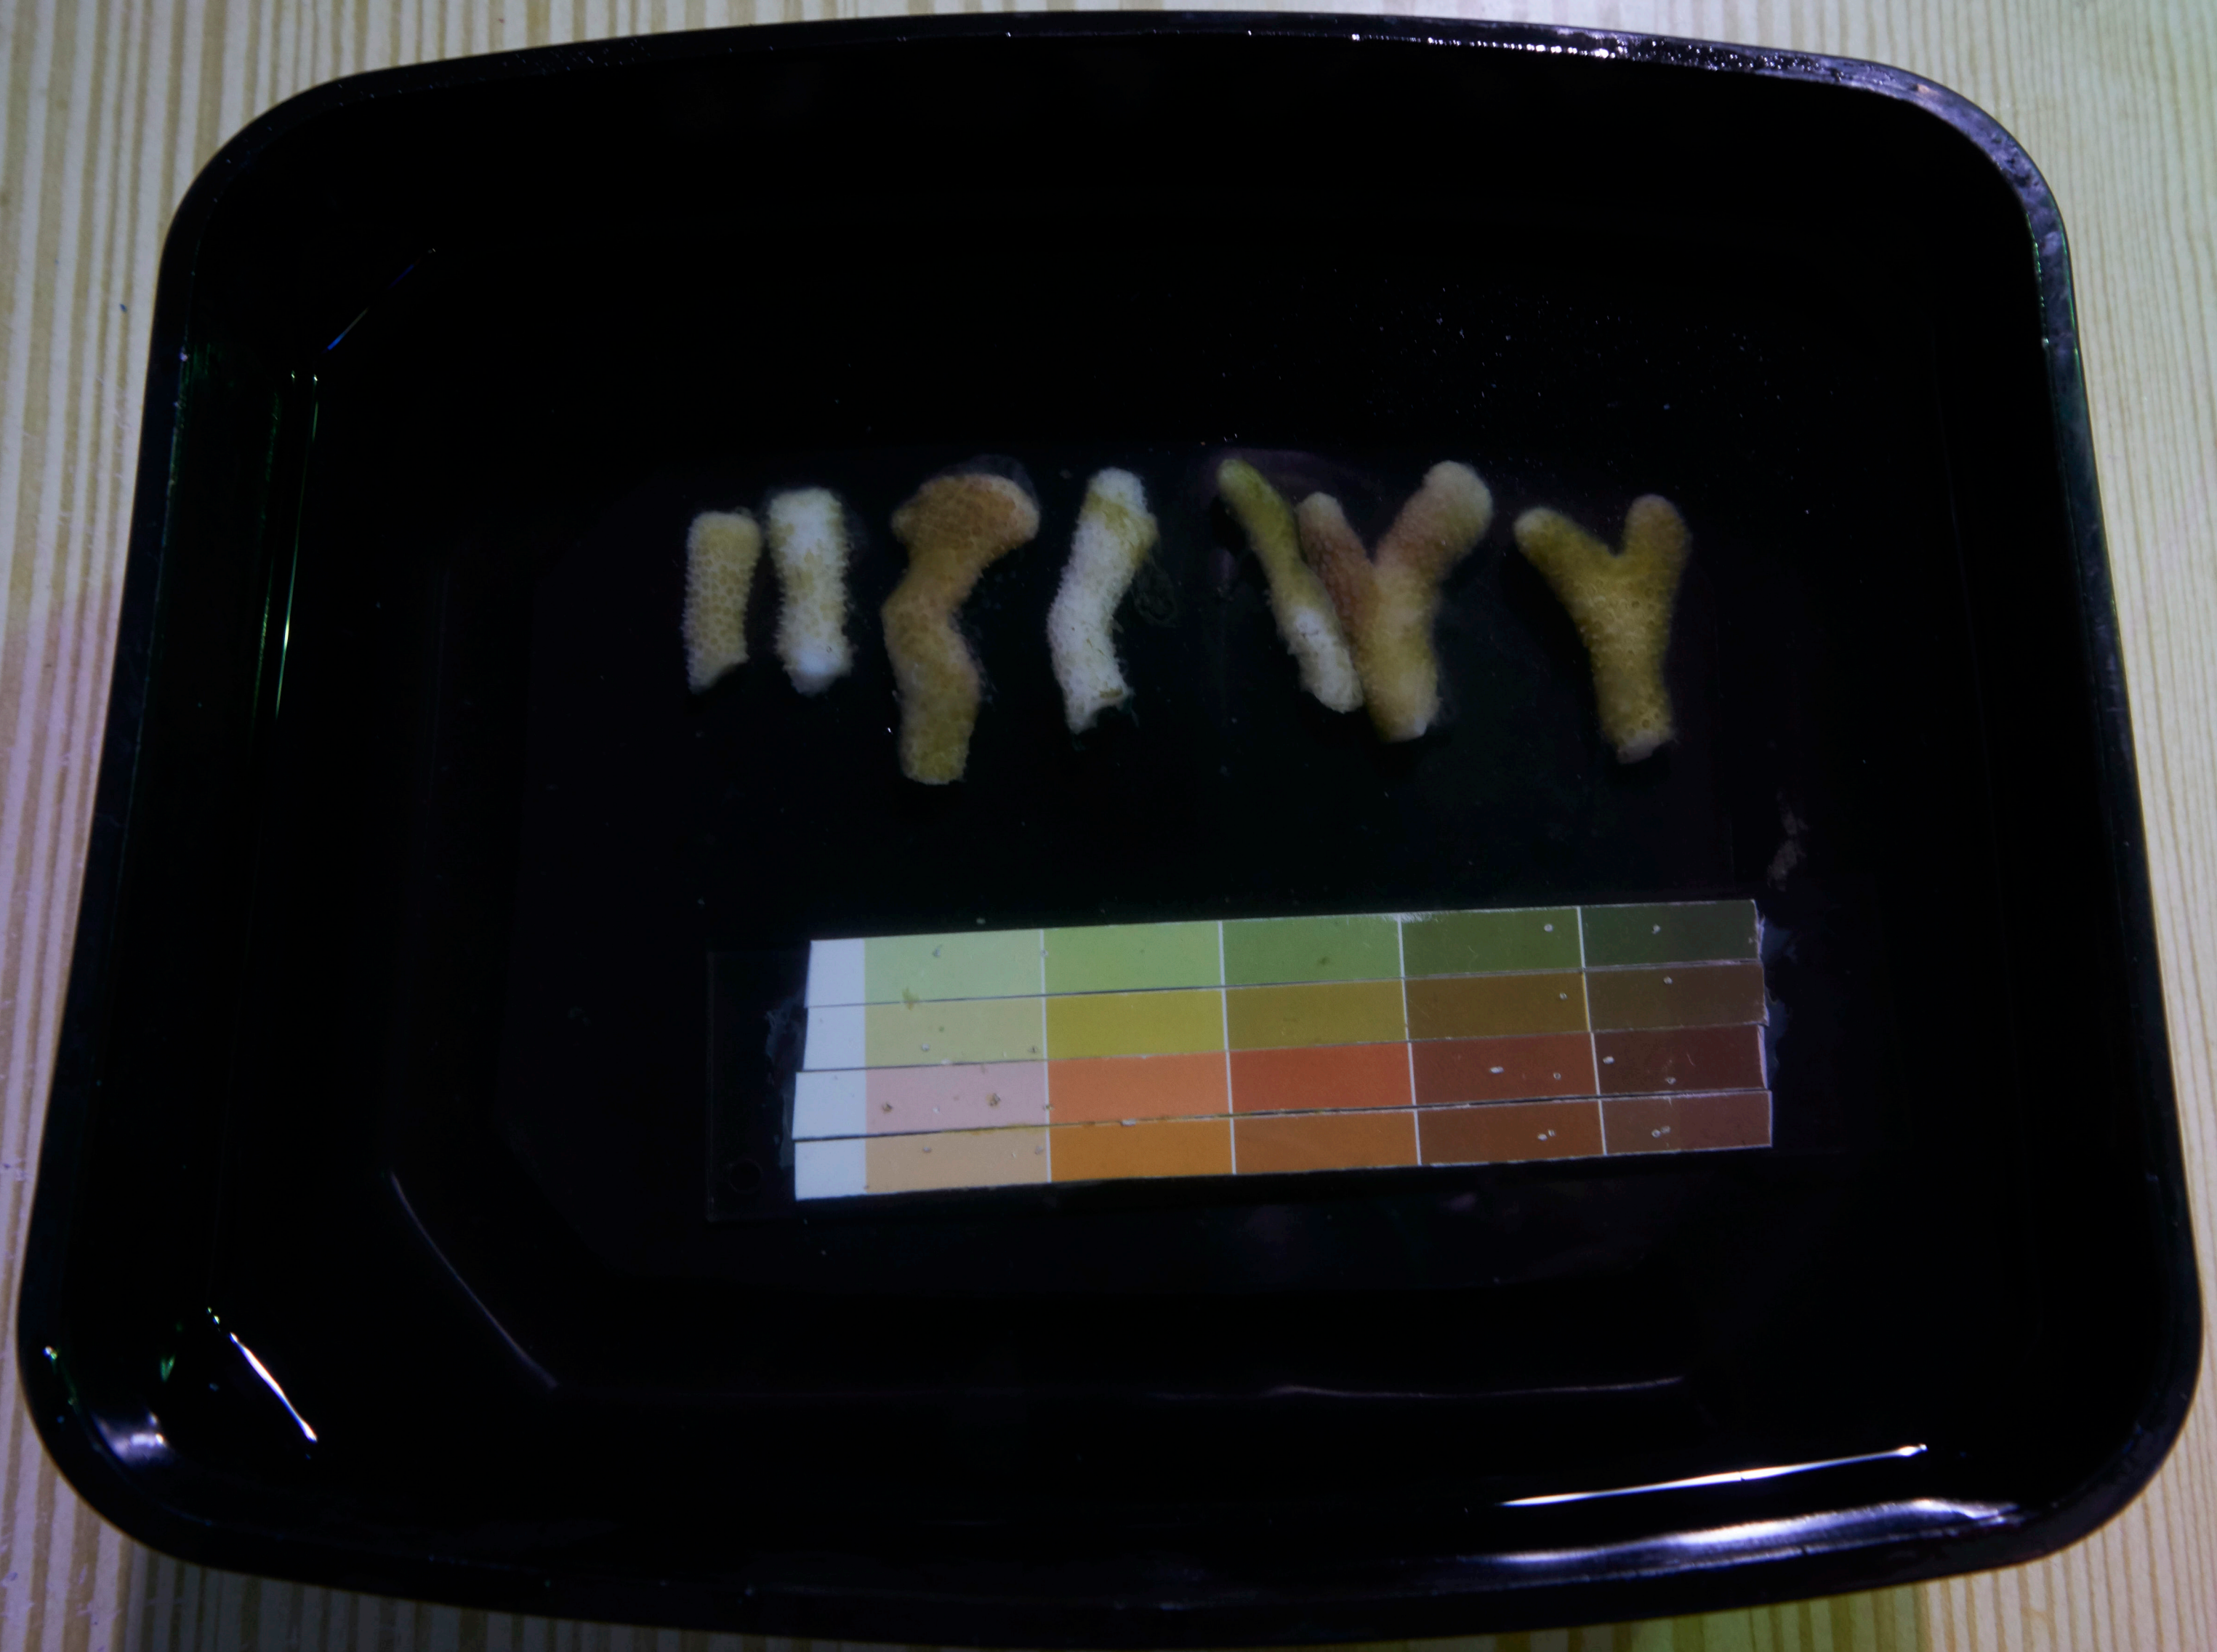

Supplement: Supplementary file 12 [file ICN-39.pdf › DataS1_CoralBleaching/ICN-39.pdf]

S1-P-ST-30B S2-P-ST-30B S3-P-ST-30B

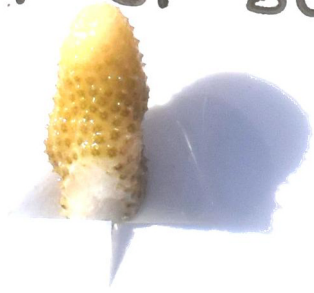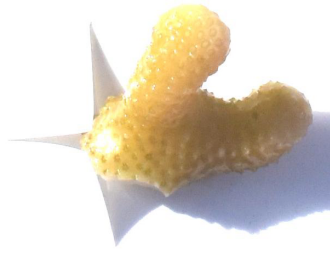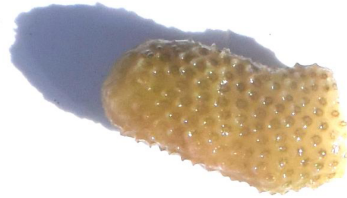

S4-P-ST-30B

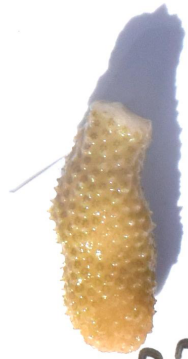

S4-P-ST-30B

S1-P-ST-30B

S2-P-ST-30B S3-P-ST-30B

S5-P-ST-30B

S6-P-ST-30B

S7-P-ST-30B

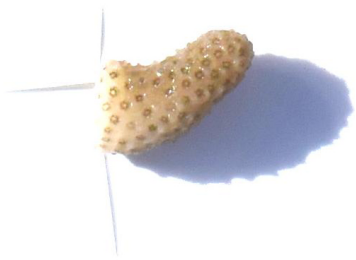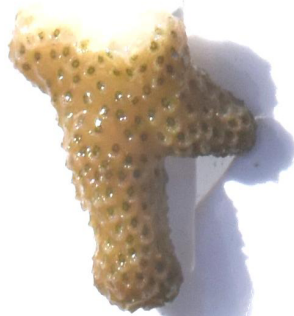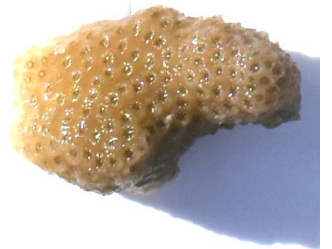

S5-P-ST-30B

S6-P-ST-30B

S7-P-ST-30B

Supplement: Supplementary file 13 [file PrT-30.pdf › DataS1_CoralBleaching/PrT-30.pdf]

S1-P-ST-33B

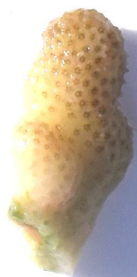

S1-P-ST-33B

S2-P-ST-33B

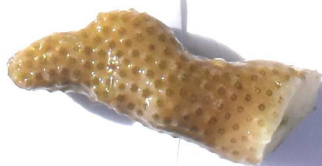

S2-P-ST-33B

S3-P-ST-33B

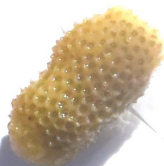

S3-P-ST-33B

S4-P-ST-33B

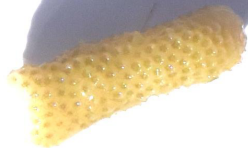

S4-P-ST-33B

S5-P-ST-33B

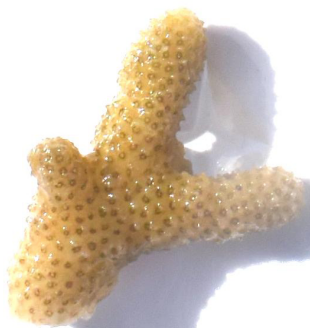

S5-P-ST-33B

S6-P-ST-33B

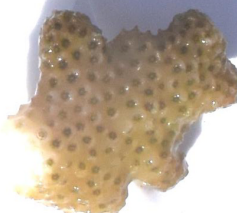

S6-P-ST-33B

S7-P-ST-33B

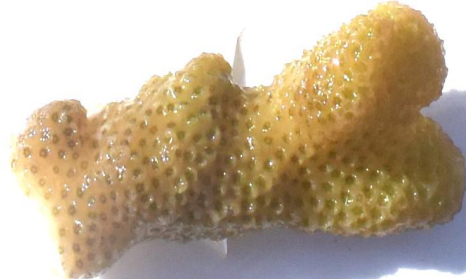

S7-P-ST-33B

Supplement: Supplementary file 14 [file PrT-33.pdf › DataS1_CoralBleaching/PrT-33.pdf]

S1-P-ST-36B S2-P-ST-36B S3-P-ST-36B S4-P-ST-36B

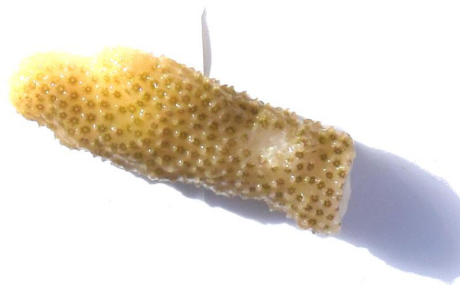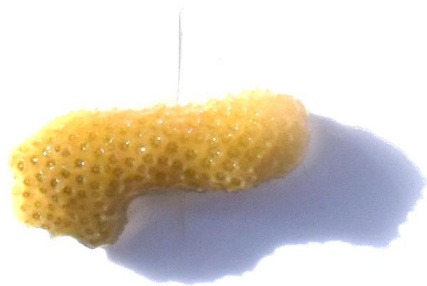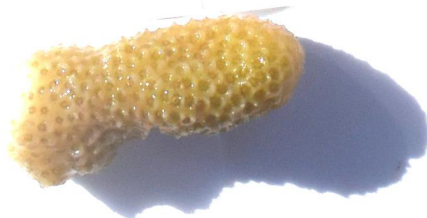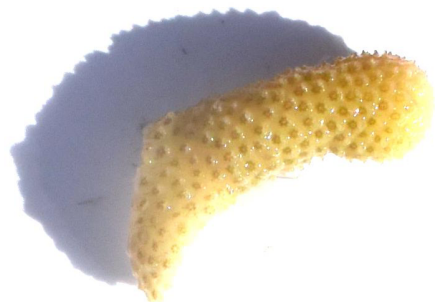

S1-P-ST-36B S2-P-ST-36B S3-P-ST-36B S4-P-ST-36B

S5-P-ST-36B

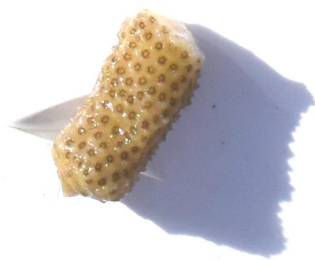

S6-P-ST-36B

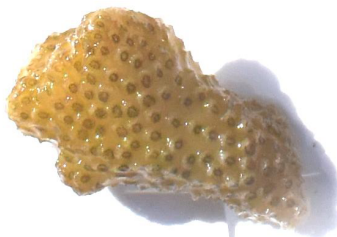

S7-P-ST-36B

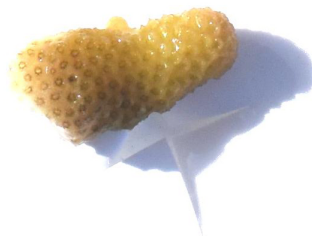

S5-P-ST-36B

S6-P-ST-36B

S7-P-ST-36B

Supplement: Supplementary file 15 [file PrT-36.pdf › DataS1_CoralBleaching/PrT-36.pdf]

S1-P-ST-39B

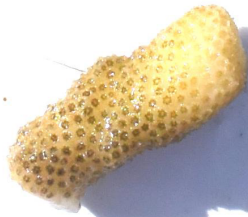

S2-P-ST-39B

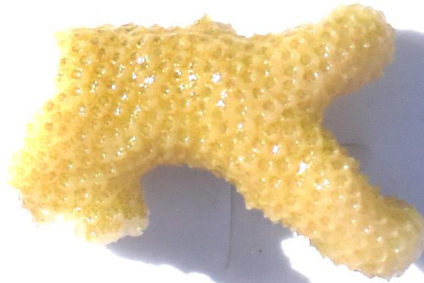

S3-P-ST-39B

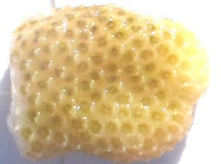

S1-P-ST-39B

S2-P-ST-39B

S3-P-ST-39B

S4-P-ST-39B

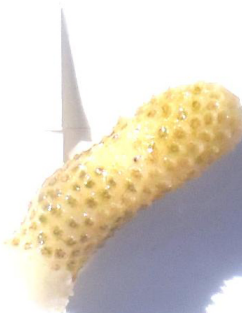

S5-P-ST-39B

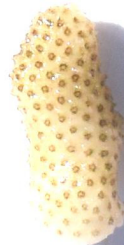

S7-P-ST-39B

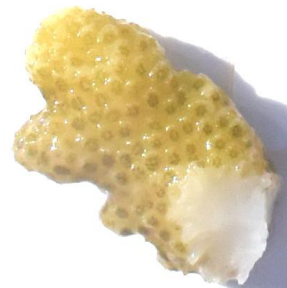

S4-P-ST-39B

S5-P-ST-39B

S7-P-ST-39<sup>a</sup>B

Supplement: Supplementary file 16 [file PrT-39.pdf › DataS1_CoralBleaching/PrT-39.pdf]
